# Supplementary material for: Fe-BPsalan complex catalyzed highly enantioselective Diels–Alder reaction of alkylidene β-ketoesters
Source: Royal Society of Chemistry journal article supplement (doi:10.1039/d1qo00158b), 2021-01-01
Supplement: d1qo00158b1.pdf [file d1qo00158b1.pdf]

**Electronic Supplementary Information**  
**Fe-BPsalan complexes catalyzed highly enantioselective**  
**Diels-Alder reaction of alkylidene  $\beta$ -ketoesters**

Yuan-Ji Ping,<sup>a</sup> Yi-Ming Zhou,<sup>ad</sup> Liang-Liang Wu,<sup>b</sup> Zong-Rui Li,<sup>a</sup> Xin Gu,<sup>a</sup>  
Xiao-Long Wan,<sup>a</sup> Zhen-Jiang Xu<sup>\*a</sup> and Chi-Ming Che<sup>\*a,b,c</sup>

<sup>a</sup> Shanghai-Hong Kong Joint Laboratory in Chemical Synthesis, Shanghai Institute of Organic Chemistry, 345 Lingling Road, Shanghai 200032, China

<sup>b</sup> State Key Laboratory of Synthetic Chemistry, Department of Chemistry, The University of Hong Kong, Pokfulam Road, Hong Kong SAR, China

<sup>c</sup> HKU Shenzhen Institute of Research and Innovation, Shenzhen, Guangdong 518057, China

<sup>d</sup> Shanghai Normal University, Shanghai, 200234, China

\* E-mail: xuzhenjiang@sioc.ac.cn (Z.-J. Xu), cmche@hku.hk (C.-M. Che).

**Table of Contents**

|                                                                                                                                                         |             |
|---------------------------------------------------------------------------------------------------------------------------------------------------------|-------------|
| <b>1. General experimental information</b>                                                                                                              | <b>S2</b>   |
| <b>2. General procedure for the synthesis of Fe-BPsalan complexes and starting materials</b>                                                            | <b>S3</b>   |
| <b>3. General experimental procedure for Fe-BPsalan complexes catalyzed asymmetric Diels-Alder reaction of alkylidene <math>\beta</math>-ketoesters</b> | <b>S22</b>  |
| <b>4. Mass spectrometry analysis</b>                                                                                                                    | <b>S44</b>  |
| <b>5. IR spectra</b>                                                                                                                                    | <b>S45</b>  |
| <b>6. X-ray crystal structure of compound 3s</b>                                                                                                        | <b>S46</b>  |
| <b>7. Computational details</b>                                                                                                                         | <b>S48</b>  |
| <b>8. References</b>                                                                                                                                    | <b>S58</b>  |
| <b>9. NMR spectra of new compounds (<sup>1</sup>H NMR, <sup>13</sup>C NMR, <sup>19</sup>F NMR)</b>                                                      | <b>S61</b>  |
| <b>10. HPLC data</b>                                                                                                                                    | <b>S106</b> |

## 1. General experimental information

All manipulations were carried out using standard Schlenk line or drybox techniques under an atmosphere of argon. Solvents were refluxed over magnesium (methanol, ethanol), sodium (toluene, THF, Et<sub>2</sub>O), or calcium hydride (DCM, DCE, EA, MeCN) under an argon atmosphere and collected by distillation. Flash column chromatography was performed with Huanghai silica gel (300-400 mesh). <sup>1</sup>H and <sup>13</sup>C NMR spectra were recorded on a Bruker AM 400 (400 MHz) spectrometer. <sup>1</sup>H and <sup>13</sup>C NMR spectra were referenced internally to residual protio-solvent (<sup>1</sup>H) or solvent (<sup>13</sup>C) resonances and are reported relative to tetramethylsilane. Data are reported as follows: chemical shift, multiplicity (s = singlet, d = doublet, t = triplet, q = quartet, m = multiplet), coupling constants (Hz) and integration. HPLC analyses were conducted on an Agilent 1100 Series chromatograph. Infrared spectra were prepared as KBr pellets or neat and were recorded on a Nicolet iN10 MX spectrometer. Optical rotations were measured with a Perkin-Elmer 241 polarimeter in a 1 dm cuvette. Mass spectra were recorded by the mass spectrometry service of Shanghai Institute of Organic Chemistry.

## 2. General procedure for the synthesis of Fe-BPsalan complexes and starting materials

### General procedure for the synthesis of Fe-BPsalan complexes.

Fe-BPsalan complexes (**4a-e**) with (*R,R*)-bipyrrolidine backbone BPsalan ligands were prepared by the corresponding literature procedures reported by our group.<sup>1</sup> Iron(III) complexes (**5**, **6**) were prepared by the corresponding literature procedures.<sup>2</sup>

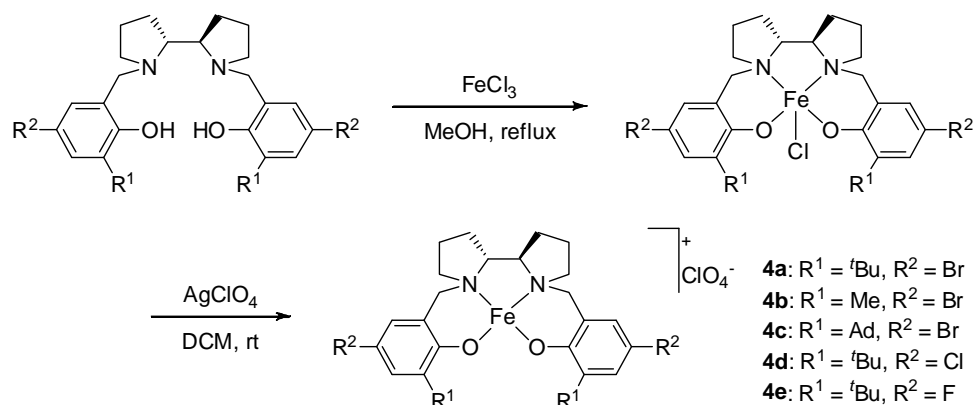

**Complex 4a:** IR (KBr):  $\nu_{\max}$  3418, 2957, 1622, 1575, 1539, 1463, 1430, 1407, 1295, 1250, 1168, 1096, 931, 879, 815, 734, 596, 497  $\text{cm}^{-1}$ . HRMS (MALDI) For  $[\text{C}_{30}\text{H}_{40}\text{N}_2\text{O}_2^{79}\text{Br}_2^{54}\text{Fe}]^+$  ( $[\text{M}-\text{ClO}_4]^+$ ): Calcd.: 672.0847, Found: 672.0839.

**Complex 4b:** IR (KBr):  $\nu_{\max}$  2957, 2922, 2852, 1607, 1475, 1443, 1204, 1089, 867, 800, 726, 622  $\text{cm}^{-1}$ . HRMS (MALDI) For  $[\text{C}_{24}\text{H}_{28}\text{N}_2\text{O}_2^{79}\text{Br}_2^{54}\text{Fe}]^+$  ( $[\text{M}-\text{ClO}_4]^+$ ): Calcd.: 587.9908, Found: 587.9880.

**Complex 4c:** IR (KBr):  $\nu_{\max}$  2900, 2846, 1571, 1428, 1406, 1248, 1228, 1099, 1077, 867, 804, 717, 651, 580, 494  $\text{cm}^{-1}$ . HRMS (MALDI) For  $[\text{C}_{42}\text{H}_{52}\text{N}_2\text{O}_2^{79}\text{Br}_2^{54}\text{Fe}]^+$  ( $[\text{M}-\text{ClO}_4]^+$ ): Calcd.: 828.1786, Found: 828.1799.

**Complex 4d:** IR (KBr):  $\nu_{\max}$  2956, 1581, 1432, 1411, 1293, 1249, 1090, 928, 874, 815, 753, 623, 598, 507  $\text{cm}^{-1}$ . HRMS (MALDI) For  $[\text{C}_{30}\text{H}_{40}\text{N}_2\text{O}_2^{35}\text{Cl}_2^{54}\text{Fe}]^+$  ( $[\text{M}-\text{ClO}_4]^+$ ): Calcd.: 584.1858, Found: 584.1839.

**Complex 4e:** IR (KBr):  $\nu_{\max}$  2959, 1597, 1422, 1296, 1203, 1094, 994, 871, 823, 797, 623, 548  $\text{cm}^{-1}$ . HRMS (MALDI) For  $[\text{C}_{30}\text{H}_{40}\text{N}_2\text{O}_2^{19}\text{F}_2^{54}\text{Fe}]^+$  ( $[\text{M}-\text{ClO}_4]^+$ ): Calcd.: 552.2449, Found: 552.2431.

## General procedure of trifluoromethanesulfonate

### Method 1<sup>3</sup>:

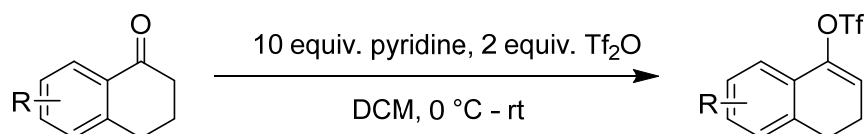

To a solution of 1-tetralone (1 equiv.) in DCM, Tf<sub>2</sub>O (2 equiv.) and pyridine (10 equiv.) were sequentially added at 0 °C. The mixture was allowed to warm to room temperature and stirred overnight. H<sub>2</sub>O was added and the aqueous layer was extracted by DCM 3 times, and the combined organic layer was dried over MgSO<sub>4</sub> and concentrated in vacuo. The residue was purified by flash column chromatography.

### Method 2<sup>4</sup>:

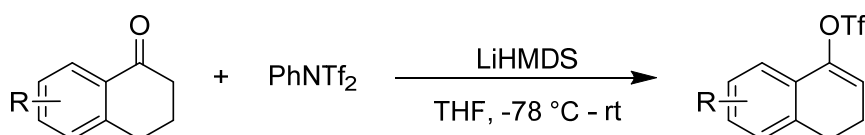

To a solution of 1-tetralone (1 equiv.) in dry THF, 1 M LiHMDS (1.5 equiv.) was added at -78 °C. After stirring for 1 h, PhNTf<sub>2</sub> (1 equiv.) was added and stirred at the same temperature for another hour. The reaction mixture was allowed to warm to room temperature and stirred overnight. Saturated NH<sub>4</sub>Cl solution was added to quench the reaction, and the reaction mixture was extracted with Et<sub>2</sub>O 3 times. The combined organic layer was dried over MgSO<sub>4</sub> and concentrated in vacuo. The residue was purified by flash column chromatography.

### 3,4-Dihydro-1H-naphthalen-1-yl trifluoromethanesulfonate<sup>3</sup>

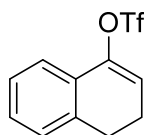

Method 1, prepared from 34.2 mmol of 1-tetralone to afford 9.05 g (32.5 mmol, 95% yield) of desired product as a yellow liquid. <sup>1</sup>H NMR (300 MHz, CDCl<sub>3</sub>): δ 7.39-7.31 (m, 1H), 7.31-7.22 (m, 2H), 7.22-7.13 (m, 1H), 6.02 (t, *J* = 4.8 Hz, 1H), 2.87 (t, *J* = 8.2 Hz, 2H), 2.51 (td, *J* = 8.1, 4.8 Hz, 2H). <sup>19</sup>F NMR (376 MHz, CDCl<sub>3</sub>): δ -74.09.

### 6-Methoxy-3,4-dihydronaphthalen-1-yl trifluoromethanesulfonate<sup>3</sup>

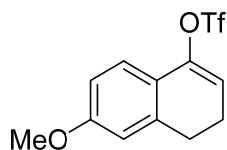

Method 1, prepared from 11.3 mmol of 6-methoxy-1-tetralone to afford 2.22 g (7.2 mmol, 63% yield) of desired product as a yellow liquid. <sup>1</sup>H NMR (400 MHz, CDCl<sub>3</sub>): δ 7.26 (d, *J* = 9.3 Hz, 1H), 6.75 (d, *J* = 8.3 Hz, 2H), 6.72 (s, 1H), 5.85 (t, *J* = 4.8 Hz, 1H), 3.80 (s, 3H), 2.82 (q, *J* = 8.1 Hz, 2H), 2.55-2.33 (m, 2H). <sup>19</sup>F NMR (376 MHz, CDCl<sub>3</sub>): δ -73.76.

### 7-Methoxy-3,4-dihydronaphthalen-1-yl trifluoromethanesulfonate<sup>5</sup>

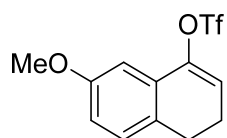

Method 1, prepared from 11.4 mmol of 7-methoxy-1-tetralone to afford 2.59 g (8.4 mmol, 74% yield) of desired product as a yellow liquid. <sup>1</sup>H NMR (400 MHz, CDCl<sub>3</sub>): δ 6.92 (d, *J* = 2.6 Hz, 1H), 6.81 (dd, *J* = 8.2, 2.2 Hz, 2H), 6.04 (t, *J* = 4.8 Hz, 1H), 3.81 (s, 3H), 2.80 (q, *J* = 8.2 Hz, 2H), 2.54-2.44 (m, 2H). <sup>13</sup>C NMR (101 MHz, CDCl<sub>3</sub>): δ 158.7, 146.3, 129.6, 128.8, 128.3, 118.74 (t, *J* = 321.2 Hz), 118.5, 114.5, 107.2, 55.4, 26.0, 22.8. <sup>19</sup>F NMR (376 MHz, CDCl<sub>3</sub>): δ -73.78.

### 5-Methoxy-3,4-dihydronaphthalen-1-yl trifluoromethanesulfonate<sup>6</sup>

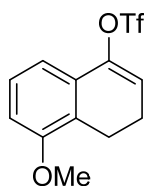

Method 1, prepared from 11.4 mmol of 5-methoxy-1-tetralone to afford 2.18 g (7.1 mmol, 62% yield) of desired product as a yellow liquid. <sup>1</sup>H NMR (400 MHz, CDCl<sub>3</sub>): δ 7.22 (t, *J* = 8.3 Hz, 1H), 7.00 (d, *J* = 7.8 Hz, 1H), 6.87 (d, *J* = 8.3 Hz, 1H), 6.00 (t, *J* = 4.6 Hz, 1H), 3.83 (s, 3H), 2.86 (t, *J* = 8.4 Hz, 2H), 2.47 (tdd, *J* = 8.2, 4.8, 1.3 Hz, 2H). <sup>13</sup>C NMR (101 MHz, CDCl<sub>3</sub>): δ 156.2, 146.4, 129.7, 127.3, 124.3, 118.7 (q, *J* = 322.2 Hz), 118.0, 113.9, 111.8, 55.6, 21.9, 19.2. <sup>19</sup>F NMR (376 MHz, CDCl<sub>3</sub>): δ -73.78.

### 6,7-Dimethoxy-3,4-dihydronaphthalen-1-yl trifluoromethanesulfonate<sup>7</sup>

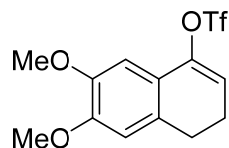

Method 1, prepared from 4.9 mmol of 6,7-dimethoxy-1-tetralone to afford 0.71 g (2.1 mmol, 43% yield) of desired product as a yellow liquid. **<sup>1</sup>H NMR** (400 MHz, CDCl<sub>3</sub>): δ 6.88 (s, 1H), 6.71 (s, 1H), 5.88 (t, *J* = 4.8 Hz, 1H), 3.89 (s, 3H), 3.87 (s, 3H), 2.79 (t, *J* = 8.3 Hz, 2H), 2.48 (ddd, *J* = 9.3, 7.6, 4.8 Hz, 2H). **<sup>13</sup>C NMR** (101 MHz, CDCl<sub>3</sub>): δ 149.56, 147.77, 146.24, 129.36, 121.26, 118.68 (q, *J* = 320.5 Hz), 115.13, 111.46, 105.24, 56.09, 26.67, 22.58. **<sup>19</sup>F NMR** (376 MHz, CDCl<sub>3</sub>): δ -73.79.

### 6-Isopropoxy-3,4-dihydronaphthalen-1-yl trifluoromethanesulfonate

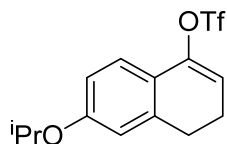

Method 1, prepared from 4.9 mmol of 6-isopropoxy-1-tetralone to afford 1.47 g (4.4 mmol, 89% yield) of desired product as a yellow liquid. **<sup>1</sup>H NMR** (400 MHz, CDCl<sub>3</sub>): δ 7.16 (dd, *J* = 8.7, 2.9 Hz, 1H), 6.69-6.59 (m, 2H), 5.75 (tt, *J* = 4.9, 1.4 Hz, 1H), 4.52-4.42 (m, 1H), 2.72 (t, *J* = 8.1 Hz, 2H), 2.37 (td, *J* = 8.1, 4.8, 2H), 1.25 (dd, *J* = 6.0, 1.4 Hz, 6H). **<sup>13</sup>C NMR** (101 MHz, CDCl<sub>3</sub>): δ 158.8, 146.5, 138.4, 122.8, 121.4, 118.7 (q, *J* = 320.1 Hz), 115.9, 114.7, 113.0, 70.0, 27.4, 22.4, 22.1. **<sup>19</sup>F NMR** (376 MHz, CDCl<sub>3</sub>): δ -73.81. **IR** (KBr):  $\nu_{\max}$  2979, 2940, 1654, 1609, 1568, 1497, 1419, 1249, 1212, 1142, 1008, 911, 886, 845, 605 cm<sup>-1</sup>. **MS** (EI): (relative intensity): *m/z* 336 (M<sup>+</sup>), 294 (68.87), 161 (65.82), 133 (100), 115 (28.46), 105 (27.43). **HRMS** (EI) For [C<sub>14</sub>H<sub>15</sub>O<sub>4</sub>F<sub>3</sub>S]<sup>+</sup> (M<sup>+</sup>): Calcd.: 336.0643, Found: 336.0645.

### 6-(Benzyloxy)-3,4-dihydronaphthalen-1-yl trifluoromethanesulfonate<sup>8</sup>

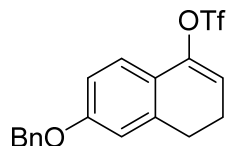

Method 1, prepared from 6.1 mmol of 6-benzyloxy-1-tetralone to afford 0.91 g (2.4 mmol, 39% yield) of desired product as a yellow liquid. **<sup>1</sup>H NMR** (400 MHz, CDCl<sub>3</sub>): δ 7.50-7.33 (m, 5H), 7.30 (d, *J* = 8.3 Hz, 1H), 6.92-6.83 (m, 2H), 5.89 (t, *J* = 4.8 Hz, 1H), 5.09 (s, 2H), 2.85 (t, *J* = 8.1

Hz, 2H), 2.49 (ddd,  $J = 9.3, 7.4, 4.8$  Hz, 2H).  $^{13}\text{C NMR}$  (101 MHz,  $\text{CDCl}_3$ ):  $\delta$  159.5, 146.4, 138.4, 136.7, 128.8, 128.2, 127.5, 122.8, 122.0, 118.7 (q,  $J = 320.2$  Hz), 115.2, 115.1, 112.3, 70.1, 27.4, 22.3.  $^{19}\text{F NMR}$  (376 MHz,  $\text{CDCl}_3$ ):  $\delta$  -73.72.

### 5,7-Dimethyl-3,4-dihydronaphthalen-1-yl trifluoromethanesulfonate

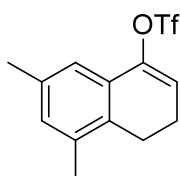

Method 1, prepared from 11.5 mmol of 5,7-dimethyl-1-tetralone to afford 2.35 g (7.7 mmol, 67% yield) of desired product as a yellow liquid.  $^1\text{H NMR}$  (400 MHz,  $\text{CDCl}_3$ ):  $\delta$  7.12 (s, 1H), 7.03 (s, 1H), 6.04 (t,  $J = 4.8$  Hz, 1H), 2.82 (t,  $J = 8.3$  Hz, 2H), 2.53 (td,  $J = 8.3, 4.8$  Hz, 2H), 2.38 (s, 3H), 2.31 (s, 3H).  $^{13}\text{C NMR}$  (101 MHz,  $\text{CDCl}_3$ ):  $\delta$  146.9, 135.8, 135.4, 132.1, 131.6, 128.5, 120.3, 119.9, 118.8 (q,  $J = 321$  Hz), 117.1, 117.0, 22.6, 22.1, 21.1, 19.4.  $^{19}\text{F NMR}$  (376 MHz,  $\text{CDCl}_3$ ):  $\delta$  -73.83. **IR** (KBr):  $\nu_{\text{max}}$  2956, 2942, 1659, 1605, 1412, 1249, 1226, 1142, 1091, 902, 605  $\text{cm}^{-1}$ . **MS** (EI): (relative intensity):  $m/z$  306 ( $\text{M}^+$ ), 173 (91.53), 145 (100), 130 (52.96), 115 (40.73), 105 (22.9), 91 (16.88), 69 (19.18). **HRMS** (EI) For  $[\text{C}_{13}\text{H}_{13}\text{F}_3\text{O}_3\text{S}]^+$  ( $\text{M}^+$ ): Calcd.: 306.0538, Found: 306.0539.

### 6-Phenyl-3,4-dihydronaphthalen-1-yl trifluoromethanesulfonate

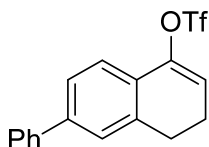

Method 1, prepared from 2.8 mmol of 6-phenyl-1-tetralone to afford 0.94 g (2.7 mmol, 94% yield) of desired product as a viscous liquid.  $^1\text{H NMR}$  (400 MHz,  $\text{CDCl}_3$ ):  $\delta$  7.61 (d,  $J = 7.4$  Hz, 2H), 7.55-7.48 (m, 2H), 7.48-7.44 (m, 2H), 7.43 (d,  $J = 2.0$  Hz, 1H), 7.42-7.34 (m, 1H), 6.06 (t,  $J = 4.8$  Hz, 1H), 2.95 (t,  $J = 8.2$  Hz, 2H), 2.57 (td,  $J = 8.2, 4.8$  Hz, 2H).  $^{13}\text{C NMR}$  (101 MHz,  $\text{CDCl}_3$ ):  $\delta$  146.4, 142.1, 140.3, 136.8, 129.0, 127.8, 127.7, 127.1, 126.7, 125.7, 121.8, 118.7 (q,  $J = 320.2$  Hz), 117.8 (t,  $J = 3.6$  Hz), 27.1, 22.5.  $^{19}\text{F NMR}$  (376 MHz,  $\text{CDCl}_3$ ):  $\delta$  -73.64. **IR** (KBr):  $\nu_{\text{max}}$  2076, 2831, 1404, 1200, 1139, 1003, 901, 759  $\text{cm}^{-1}$ . **MS** (EI): (relative intensity):  $m/z$  354

(M<sup>+</sup>), 221 (39.88), 193 (60.41), 178 (100), 165 (49.43), 115 (16.37). **HRMS** (EI) For [C<sub>17</sub>H<sub>13</sub>F<sub>3</sub>O<sub>3</sub>S]<sup>+</sup> (M<sup>+</sup>): Calcd.: 354.0537, Found: 354.0541.

### 7-Chloro-3,4-dihydronaphthalen-1-yl trifluoromethanesulfonate<sup>9</sup>

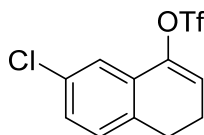

Method 2, prepared from 8.3 mmol of 7-chloro-1-tetralone to afford 0.89 g (2.8 mmol, 34% yield) of desired product as a yellow liquid. **<sup>1</sup>H NMR** (400 MHz, CDCl<sub>3</sub>): δ 7.31 (s, 1H), 7.29-7.20 (m, 1H), 7.11 (d, *J* = 8.0 Hz, 1H), 6.09 (q, *J* = 3.6 Hz, 1H), 2.84 (t, *J* = 8.3 Hz, 2H), 2.57-2.47 (m, 2H). **<sup>13</sup>C NMR** (101 MHz, CDCl<sub>3</sub>): δ 145.3, 134.5, 133.0, 130.3, 129.1, 121.6, 117.1 (q, *J* = 320.2 Hz), 119.2, 117.1, 26.4, 22.4. **<sup>19</sup>F NMR** (376 MHz, CDCl<sub>3</sub>): δ -73.54.

### 7-Fluoro-3,4-dihydronaphthalen-1-yl trifluoromethanesulfonate<sup>10</sup>

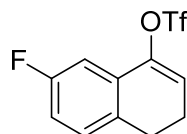

Method 2, prepared from 3.1 mmol of 7-fluoro-1-tetralone to afford 0.35 g (1.2 mmol, 39% yield) of desired product as a yellow liquid. **<sup>1</sup>H NMR** (400 MHz, CDCl<sub>3</sub>): δ 7.14 (dd, *J* = 8.1, 5.8 Hz, 1H), 7.06 (dd, *J* = 9.2, 2.6 Hz, 1H), 6.95 (td, *J* = 8.4, 2.0 Hz, 2H), 6.10 (t, *J* = 4.8 Hz, 1H), 2.83 (t, *J* = 8.2 Hz, 2H), 2.52 (td, *J* = 8.2, 4.9 Hz, 2H). **<sup>13</sup>C NMR** (101 MHz, CDCl<sub>3</sub>): δ 163.1, 160.6, 145.5 (d, *J* = 2.4 Hz), 131.7 (d, *J* = 3.4 Hz), 130.4 (d, *J* = 8.2 Hz), 129.2 (d, *J* = 7.9 Hz), 119.3, 118.7 (q, *J* = 320.2 Hz), 115.7 (d, *J* = 21.4 Hz), 108.8 (d, *J* = 24.7 Hz). **<sup>19</sup>F NMR** (376 MHz, CDCl<sub>3</sub>): δ -73.69 (s, 1F), -114.90 (q, *J* = 8.5 Hz, 3F).

### 1*H*-Inden-3-yl trifluoromethanesulfonate<sup>11</sup>

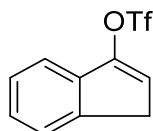

Method 1, prepared from 37.8 mmol of 1-indanone to afford 8.90 g (33.7 mmol, 89% yield) of desired product as a yellow liquid. **<sup>1</sup>H NMR** (400 MHz, CDCl<sub>3</sub>): δ 7.50-7.44 (m, 1H), 7.41 (ddd, *J* = 8.7, 7.4, 1.4 Hz, 1H), 7.38-7.28 (m, 2H), 6.37 (t, *J* = 2.3 Hz, 1H), 3.47 (d, *J* = 2.4 Hz, 2H). **<sup>13</sup>C**



**NMR** (101 MHz, CDCl<sub>3</sub>):  $\delta$  148.1, 141.3, 136.7, 127.1, 127.0, 124.6, 118.8 (q,  $J$  = 322.19 Hz), 118.3, 118.2, 34.9. **<sup>19</sup>F NMR** (376 MHz, CDCl<sub>3</sub>):  $\delta$  -73.15.

### 6,7-Dihydro-5H-benzo[7]annulen-9-yl trifluoromethanesulfonate<sup>12</sup>

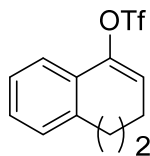

Method 1, prepared from 12.5 mmol of 1-benzosuberone to afford 3.46 g (11.9 mmol, 95% yield) of desired product as a yellow liquid. **<sup>1</sup>H NMR** (400 MHz, CDCl<sub>3</sub>):  $\delta$  7.54 - 7.52 (m, 1H), 7.32 - 7.29 (m, 2H), 7.25 - 7.23 (m, 1H), 6.24 (t,  $J$  = 6.3, 1H), 2.79 - 2.77 (m, 2H), 2.25 (q,  $J$  = 7.0, 2H), 2.12 - 2.06 (m, 2H). **<sup>13</sup>C NMR** (101 MHz, CDCl<sub>3</sub>):  $\delta$  146.3, 141.8, 132.2, 129.6, 129.4, 126.6, 126.5, 123.5, 118.7 (q,  $J$  = 318.6 Hz), 33.6, 30.7, 25.5. **<sup>19</sup>F NMR** (376 MHz, CDCl<sub>3</sub>):  $\delta$  -74.2 (t,  $J$  = 4.7 Hz).

### 3,4-Dihydronaphthalen-2-yl trifluoromethanesulfonate<sup>13</sup>

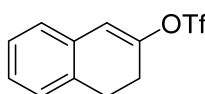

Method 1, prepared from 13.7 mmol of 2-tetralone to afford 3.23 g (11.6 mmol, 82% yield) of desired product as a yellow liquid. **<sup>1</sup>H NMR** (400 MHz, CDCl<sub>3</sub>):  $\delta$  7.24-7.20 (m, 2H), 7.18-7.13 (m, 1H), 7.11-7.06 (m, 1H), 6.50 (s, 1H), 3.07 (t,  $J$  = 8.4 Hz, 2H), 2.71 (td,  $J$  = 8.4, 1.3 Hz, 2H). **<sup>19</sup>F NMR** (376 MHz, CDCl<sub>3</sub>):  $\delta$  -73.59.

### General procedure of diene<sup>3</sup>

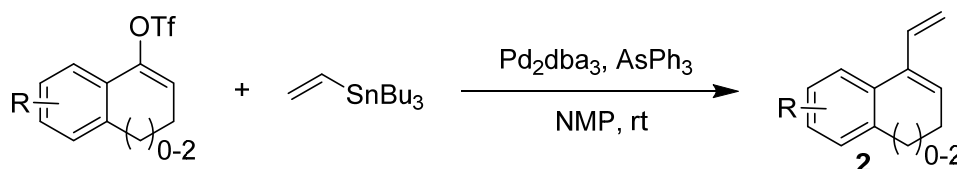

Pd<sub>2</sub>dba<sub>3</sub> (3 mol%) and AsPh<sub>3</sub> (10 mol%) were placed in 20 mL NMP under Ar atmosphere. After degassing for 20 min, corresponding trifluoromethanesulfonate (1 equiv.) and vinyl tributyltin (1.5 equiv.) were added and the reaction mixture was stirred at room temperature for 5 h. Adding of 2 M KF (5 equiv.) solution and H<sub>2</sub>O (100 mL) resulted in the formation of a precipitate.

The reaction mixture was stirred vigorously for 30 min, filtered through a pad of Celite, extracted with EtOAc (50 mL  $\times$  3). The combined organic layer was dried over MgSO<sub>4</sub>, concentrated in vacuo. The residue was purified by flash column chromatography.

#### 4-Vinyl-1,2-dihydronaphthalene (**2a**)<sup>3</sup>

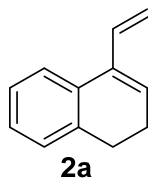

Prepared from 3.6 mmol of corresponding trifluoromethanesulfonate to afford 0.47 g (3.0 mmol, 84% yield) of **2a** as a colorless liquid. <sup>1</sup>H NMR (400 MHz, CDCl<sub>3</sub>):  $\delta$  7.34 (d,  $J$  = 7.3 Hz, 1H), 7.27-7.16 (m, 1H), 7.19-7.11 (m, 2H), 6.69-6.57 (m, 1H), 6.19 (t,  $J$  = 4.9 Hz, 1H), 5.53 (d,  $J$  = 17.4 Hz, 1H), 5.20 (d,  $J$  = 11.0 Hz, 1H), 2.75 (t,  $J$  = 7.9 Hz, 2H), 2.30 (td,  $J$  = 7.9, 5.0 Hz, 2H). <sup>13</sup>C NMR (101 MHz, CDCl<sub>3</sub>):  $\delta$  136.7, 136.6, 135.6, 134.2, 127.7, 127.1, 126.5, 126.4, 123.9, 115.3, 28.3, 23.3. MS (EI): (relative intensity):  $m/z$  156 (M<sup>+</sup>), 141 (99.53), 128 (100), 115 (77.39).

#### 7-Methoxy-4-vinyl-1,2-dihydronaphthalene (**2b**)<sup>3</sup>

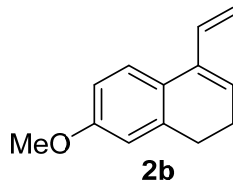

Prepared from 3.2 mmol of corresponding trifluoromethanesulfonate to afford 0.48 g (2.6 mmol, 79% yield) of **2b** as a colorless liquid. <sup>1</sup>H NMR (400 MHz, CDCl<sub>3</sub>):  $\delta$  7.26 (s, 1H), 6.74 (s, 1H), 6.66-6.54 (m, 2H), 6.07 (t,  $J$  = 4.7 Hz, 1H), 5.51 (dd,  $J$  = 17.4, 1.9 Hz, 1H), 5.17 (dd,  $J$  = 10.8, 1.9 Hz, 1H), 3.81 (s, 3H), 2.73 (t,  $J$  = 7.9 Hz, 2H), 2.34-2.24 (m, 2H). <sup>13</sup>C NMR (101 MHz, CDCl<sub>3</sub>):  $\delta$  158.6, 138.6, 136.3, 135.8, 127.3, 125.1, 124.2, 115.0, 113.9, 110.9, 55.3, 28.8, 23.2. MS (EI): (relative intensity):  $m/z$  186 (M<sup>+</sup>), 171 (69.44), 128 (69.26), 115 (73.56).

#### 6-Methoxy-4-vinyl-1,2-dihydronaphthalene (**2c**)<sup>14</sup>

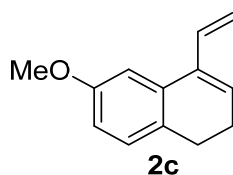

Prepared from 7.8 mmol of corresponding trifluoromethanesulfonate to afford 1.07 g (5.7 mmol, 74% yield) of **2c** as a colorless liquid.  $^1\text{H NMR}$  (400 MHz,  $\text{CDCl}_3$ ):  $\delta$  7.12 (d,  $J = 8.0$  Hz, 1H), 7.00-6.95 (m, 2H), 6.75 (dd,  $J = 8.2, 2.5$  Hz, 1H), 6.65 (dd,  $J = 16.8, 11.0$  Hz, 1H), 6.24 (t,  $J = 4.9$  Hz, 1H), 5.58 (d,  $J = 17.3$  Hz, 1H), 5.24 (d,  $J = 10.9$  Hz, 1H), 3.83 (s, 3H), 2.72 (t,  $J = 7.9$  Hz, 2H), 2.32 (td,  $J = 7.8, 5.0$  Hz, 2H).  $^{13}\text{C NMR}$  (101 MHz,  $\text{CDCl}_3$ ):  $\delta$  158.3, 136.6, 135.5, 135.1, 128.8, 128.3, 127.1, 115.4, 111.7, 110.4, 55.4, 27.3, 23.6.

### 8-Methoxy-4-vinyl-1,2-dihydronaphthalene (**2d**)

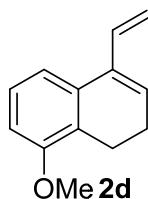

Prepared from 7.1 mmol of corresponding trifluoromethanesulfonate to afford 1.10 g (5.9 mmol, 84% yield) of **2d** as a colorless liquid.  $^1\text{H NMR}$  (400 MHz,  $\text{CDCl}_3$ ):  $\delta$  7.12 (t,  $J = 7.9$  Hz, 1H), 6.74 (dd,  $J = 10.3, 7.9$  Hz, 2H), 6.56 (dd,  $J = 17.4, 10.7$  Hz, 1H), 6.41 (s, 1H), 5.40-5.28 (m, 1H), 5.15 (d,  $J = 10.9$  Hz, 1H), 3.84 (s, 3H), 2.87 (t,  $J = 8.4$  Hz, 2H), 2.46 (dd,  $J = 9.1, 7.6$  Hz, 2H).  $^{13}\text{C NMR}$  (101 MHz,  $\text{CDCl}_3$ ):  $\delta$  156.1, 138.6, 137.7, 135.6, 128.1, 126.8, 123.3, 119.6, 113.0, 109.8, 55.6, 21.8, 20.0. **IR** (KBr):  $\nu_{\text{max}}$  2935, 2834, 1597, 1570, 1460, 1438, 1336, 1261, 1143, 1082, 1038, 913, 830, 790, 782, 729  $\text{cm}^{-1}$ . **MS** (EI): (relative intensity):  $m/z$  186 ( $\text{M}^+$ ), 171 (59.4), 155 (68.16), 141 (37.85), 128 (54.55), 115 (70.07). **HRMS** (EI) For  $[\text{C}_{13}\text{H}_{14}\text{O}]^+$  ( $\text{M}^+$ ): Calcd.: 186.1045, Found: 186.1043.

### 6,7-Dimethoxy-4-vinyl-1,2-dihydronaphthalene (**2e**)

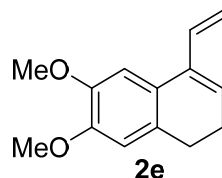

Prepared from 1.9 mmol of corresponding trifluoromethanesulfonate to afford 0.26 g (1.2 mmol, 62% yield) of **2e** as a colorless liquid.  $^1\text{H NMR}$  (400 MHz,  $\text{CDCl}_3$ ):  $\delta$  6.90 (s, 1H), 6.71 (s, 1H), 6.58 (ddd,  $J = 17.4, 10.9, 1.2$  Hz, 1H), 6.07 (t,  $J = 4.7$  Hz, 1H), 5.51 (dd,  $J = 17.4, 1.8$  Hz, 1H), 5.18 (dd,  $J = 10.9, 1.9$  Hz, 1H), 3.87 (s, 3H), 3.85 (s, 3H), 2.66 (t,  $J = 8.0$  Hz, 2H), 2.33-2.11 (m,

2H).  $^{13}\text{C}$  NMR (101 MHz,  $\text{CDCl}_3$ ):  $\delta$  147.9, 147.2, 136.4, 135.9, 129.5, 126.9, 124.7, 115.3, 111.6, 108.5, 56.3, 56.1, 28.0, 23.5. IR (KBr):  $\nu_{\text{max}}$  2929, 2831, 1602, 1569, 1509, 1402, 1355, 1273, 1264, 1234, 1143, 1032, 997, 911, 866, 799  $\text{cm}^{-1}$ . MS (EI): (relative intensity):  $m/z$  216 ( $\text{M}^+$ ), 201 (32.24), 185 (8.36), 158 (25.57), 141 (32.95), 128 (55.46), 115 (69.98). HRMS (ESI) For  $[\text{C}_{14}\text{H}_{17}\text{O}_2]^+$  ( $[\text{M}+\text{H}]^+$ ): Calcd.: 217.1233, Found: 217.1221.

### 7-Isopropoxy-4-vinyl-1,2-dihydronaphthalene (2f)

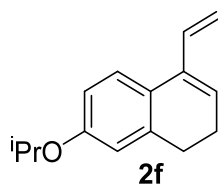

Prepared from 1.8 mmol of corresponding trifluoromethanesulfonate to afford 0.24 g (1.1 mmol, 64% yield) of **2f** as a colorless liquid.  $^1\text{H}$  NMR (400 MHz,  $\text{CDCl}_3$ ):  $\delta$  7.18 (d,  $J = 7.9$  Hz, 1H), 6.71-6.60 (m, 2H), 6.53 (ddd,  $J = 17.4, 10.9, 1.2$  Hz, 1H), 5.98 (t,  $J = 4.7$  Hz, 1H), 5.44 (dd,  $J = 17.4, 1.9$  Hz, 1H), 5.09 (dd,  $J = 10.9, 1.9$  Hz, 1H), 4.48 (p,  $J = 6.1$  Hz, 1H), 2.64 (t,  $J = 7.9$  Hz, 2H), 2.26-2.16 (m, 2H), 1.26 (d,  $J = 6.1$  Hz, 6H).  $^{13}\text{C}$  NMR (101 MHz,  $\text{CDCl}_3$ ):  $\delta$  151.6, 133.2, 130.9, 130.5, 121.7, 119.7, 118.7, 110.4, 109.6, 107.5, 72.0, 71.7, 71.4, 64.5, 23.4, 17.9, 16.9, 16.8. IR (KBr):  $\nu_{\text{max}}$  2976, 2932, 1606, 1496, 1383, 1275, 1249, 1115, 983, 823  $\text{cm}^{-1}$ . MS (EI): (relative intensity):  $m/z$  214 ( $\text{M}^+$ ), 186 (85.87), 172 (72.54), 157 (100), 145 (67.26), 133 (42.45), 128 (52.09), 115 (50.58). HRMS (EI) For  $[\text{C}_{15}\text{H}_{18}\text{O}]^+$  ( $\text{M}^+$ ): Calcd.: 214.1358, Found: 214.1354.

### 7-(Benzyloxy)-4-vinyl-1,2-dihydronaphthalene (2g)

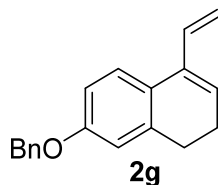

Prepared from 5.2 mmol of corresponding trifluoromethanesulfonate to afford 1.11 g (4.2 mmol, 81% yield) of **2g** as a colorless liquid.  $^1\text{H}$  NMR (400 MHz,  $\text{CDCl}_3$ )  $\delta$  7.53-7.29 (m, 6H), 6.99-6.75 (m, 2H), 6.73-6.56 (m, 1H), 6.12 (ddp,  $J = 1.5, 3.3, 4.9$ , 1H), 5.57 (dp,  $J = 17.4, 2.3$  Hz, 1H), 5.23 (dp,  $J = 10.9, 2.2$  Hz, 1H), 5.11 (s, 2H), 2.78 (t,  $J = 7.9$ , 2H), 2.32 (dt,  $J = 7.9, 4.3$  Hz, 2H).  $^{13}\text{C}$  NMR (101 MHz,  $\text{CDCl}_3$ )  $\delta$  157.9, 138.6, 137.2, 136.2, 135.8, 128.6, 128.0, 127.5, 125.1,

124.3, 115.0, 114.9, 111.9, 70.0, 28.8, 23.2. **IR** (KBr):  $\nu_{\max}$  3031, 2933, 2882, 2828, 1606, 1567, 1497, 1249, 1140, 1028, 912, 827, 735, 695  $\text{cm}^{-1}$ . **MS** (EI): (relative intensity):  $m/z$  262 ( $M^+$ ), 128 (12.06), 91 (100). **HRMS** (ESI) For  $[\text{C}_{19}\text{H}_{19}\text{O}]^+$  ( $[M+H]^+$ ): Calcd.: 263.1436, Found: 263.1429.

### 6,8-Dimethyl-4-vinyl-1,2-dihydronaphthalene (2h)

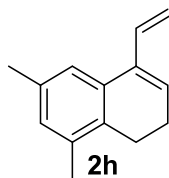

Prepared from 3.3 mmol of corresponding trifluoromethanesulfonate to afford 0.49 g (2.9 mmol, 88% yield) of **2h** as a colorless liquid.  **$^1\text{H}$  NMR** (400 MHz,  $\text{CDCl}_3$ ):  $\delta$  7.09 (s, 1H), 6.95 (s, 1H), 6.69 (ddq,  $J = 17.3, 10.8, 1.3$  Hz, 1H), 6.24 (td,  $J = 4.8, 1.2$  Hz, 1H), 5.57 (dd,  $J = 17.3, 2.0$  Hz, 1H), 5.24 (dd,  $J = 10.9, 2.0$  Hz, 1H), 2.72 (t,  $J = 8.0$  Hz, 2H), 2.38-2.34 (m, 4H), 2.34-2.31 (m, 4H)..  **$^{13}\text{C}$  NMR** (101 MHz,  $\text{CDCl}_3$ ):  $\delta$  137.0, 136.2, 135.0, 134.8, 134.0, 131.8, 130.0, 125.8, 122.7, 115.1, 23.6, 23.1, 21.2, 19.8. **IR** (KBr):  $\nu_{\max}$  2922, 2830, 1606, 1474, 1443, 1014, 911, 853  $\text{cm}^{-1}$ . **MS** (EI): (relative intensity):  $m/z$  184 ( $M^+$ ), 169 (100), 154 (33.19), 141 (20.99). **HRMS** (EI) For  $[\text{C}_{14}\text{H}_{16}]^+$  ( $M^+$ ): Calcd.: 184.1252, Found: 184.1254.

### 7-Phenyl-4-vinyl-1,2-dihydronaphthalene (2i)

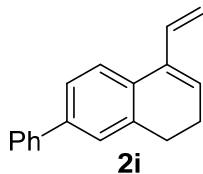

Prepared from 1.7 mmol of corresponding trifluoromethanesulfonate to afford 0.29 g (1.3 mmol, 75% yield) of **2i** as a colorless liquid.  **$^1\text{H}$  NMR** (400 MHz,  $\text{CDCl}_3$ ):  $\delta$  7.67 (d,  $J = 7.3$  Hz, 2H), 7.53-7.45 (m, 5H), 7.39 (t,  $J = 6.9$  Hz, 1H), 6.72 (dt,  $J = 16.5, 8.1$  Hz, 1H), 6.27 (t,  $J = 5.0$  Hz, 1H), 5.62 (dd,  $J = 17.4, 5.9$  Hz, 1H), 5.29 (d,  $J = 10.0$  Hz, 1H), 2.87 (q,  $J = 6.2, 4.8$  Hz, 2H), 2.41 (td,  $J = 7.8, 4.4$  Hz, 2H)..  **$^{13}\text{C}$  NMR** (101 MHz,  $\text{CDCl}_3$ ):  $\delta$  141.0, 139.8, 137.1, 136.4, 135.5, 133.3, 128.8, 127.2, 127.0, 126.6, 126.5, 125.1, 124.4, 115.4, 28.5, 23.4. **IR** (KBr):  $\nu_{\max}$  2931, 1736, 1593, 1479, 1264, 1241, 1099, 880, 813, 738  $\text{cm}^{-1}$ . **MS** (EI): (relative intensity):  $m/z$  232 ( $M^+$ ), 217 (48.53), 215 (31.85), 202 (35.57). **HRMS** (EI) For  $[\text{C}_{18}\text{H}_{16}]^+$  ( $M^+$ ): Calcd.: 232.1252, Found:

232.1247.

### 6-Chloro-4-vinyl-1,2-dihydronaphthalene (**2j**)

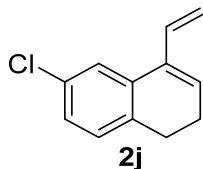

Prepared from 2.7 mmol of corresponding trifluoromethanesulfonate to afford 0.37 g (1.9 mmol, 70% yield) of **2j** as a colorless liquid.  $^1\text{H NMR}$  (400 MHz,  $\text{CDCl}_3$ ):  $\delta$  7.31 (d,  $J = 2.1$  Hz, 1H), 7.13 (dd,  $J = 8.0, 2.1$  Hz, 1H), 7.08 (d,  $J = 8.0$  Hz, 1H), 6.57 (ddq,  $J = 17.3, 10.9, 1.3$  Hz, 1H), 6.23 (t,  $J = 4.8$  Hz, 1H), 5.53 (dd,  $J = 17.3, 1.7$  Hz, 1H), 5.23 (dd,  $J = 10.9, 1.7$  Hz, 1H), 2.71 (t,  $J = 7.9$  Hz, 2H), 2.35-2.25 (m, 2H).  $^{13}\text{C NMR}$  (101 MHz,  $\text{CDCl}_3$ ):  $\delta$  136.0, 135.8, 135.0, 134.9, 132.1, 128.8, 127.6, 126.7, 124.1, 116.0, 27.6, 23.2. **IR** (KBr):  $\nu_{\text{max}}$  2931, 2835, 1611, 1574, 1486, 1425, 1249, 1161, 910, 872, 807  $\text{cm}^{-1}$ . **MS** (EI): (relative intensity):  $m/z$  190 ( $\text{M}^+$ ), 178 (26.09), 155 (100), 128 (34.84), 115 (24.73), 84 (24.62), 49 (26.07), 43 (31.23). **HRMS** (EI) For  $[\text{C}_{12}\text{H}_{11}^{35}\text{Cl}]^+$  ( $\text{M}^+$ ): Calcd.: 190.0549, Found: 190.0548.

### 6-Fluoro-4-vinyl-1,2-dihydronaphthalene (**2k**)

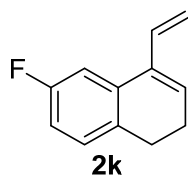

Prepared from 1.2 mmol of corresponding trifluoromethanesulfonate to afford 0.11 g (0.6 mmol, 52% yield) of **2k** as a colorless liquid.  $^1\text{H NMR}$  (400 MHz,  $\text{CDCl}_3$ ):  $\delta$  7.10 (t,  $J = 7.1$  Hz, 1H), 7.05 (dd,  $J = 10.4, 2.7$  Hz, 1H), 6.84 (td,  $J = 8.4, 2.8$  Hz, 1H), 6.56 (dd,  $J = 17.4, 10.9$  Hz, 1H), 6.23 (t,  $J = 4.9$  Hz, 1H), 5.53 (d,  $J = 17.3$  Hz, 1H), 5.22 (d,  $J = 10.9$  Hz, 1H), 2.71 (t,  $J = 7.9$  Hz, 2H), 2.30 (td,  $J = 7.9, 4.8$  Hz, 2H).  $^{13}\text{C NMR}$  (101 MHz,  $\text{CDCl}_3$ ):  $\delta$  161.8 (d,  $J = 242.2$  Hz), 136.1 (d,  $J = 2.2$  Hz), 135.9 (d,  $J = 7.5$  Hz), 135.1, 132.0 (d,  $J = 3.0$  Hz), 128.6 (d,  $J = 8.0$  Hz), 127.6, 115.8, 113.2 (d,  $J = 21.4$  Hz), 111.1 (d,  $J = 22.6$  Hz), 27.4, 23.4.  $^{19}\text{F NMR}$  (376 MHz,  $\text{CDCl}_3$ ):  $\delta$  -116.72 (q,  $J = 9.1$  Hz). **IR** (KBr):  $\nu_{\text{max}}$  2929, 1610, 1578, 1490, 1429, 1262, 1247, 1163, 904, 869, 810  $\text{cm}^{-1}$ . **MS** (EI): (relative intensity):  $m/z$  174 ( $\text{M}^+$ ), 159 (100), 146 (53.61), 133 (35.43). **HRMS**

(EI) For  $[C_{12}H_{11}F]^+$  ( $M^+$ ): Calcl.: 174.0845, Found: 174.0842.

### 3-Vinyl-1*H*-indene (**2l**)<sup>15</sup>

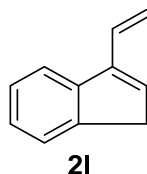

Prepared from 3.8 mmol of corresponding trifluoromethanesulfonate to afford 0.33 g (2.3 mmol, 61% yield) of **2l** as a colorless liquid.  $^1\text{H NMR}$  (400 MHz,  $\text{CDCl}_3$ ):  $\delta$  7.63 (d,  $J = 7.6$  Hz, 1H), 7.48 (d,  $J = 7.4$  Hz, 1H), 7.33 (t,  $J = 7.5$  Hz, 1H), 7.25 (d,  $J = 7.7$  Hz, 1H), 6.80 (dd,  $J = 17.9, 11.3$  Hz, 1H), 6.56 (s, 1H), 5.85 (d,  $J = 17.8$  Hz, 1H), 5.35 (d,  $J = 11.3$  Hz, 1H), 3.42 (s, 2H).  $^{13}\text{C NMR}$  (101 MHz,  $\text{CDCl}_3$ ):  $\delta$  144.7, 143.5, 131.6, 130.7, 126.2, 125.0, 124.1, 120.2, 115.9, 37.9. **MS** (EI): (relative intensity):  $m/z$  142 ( $M^+$ ), 141 (100), 115 (46.83).

### 9-Vinyl-6,7-dihydro-5*H*-benzo[7]annulene (**2m**)<sup>16</sup>

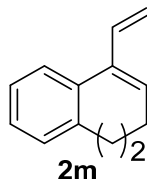

Prepared from 5.1 mmol of corresponding trifluoromethanesulfonate to afford 0.79 g (4.6 mmol, 90% yield) of **2m** as a colorless liquid.  $^1\text{H NMR}$  (400 MHz,  $\text{CDCl}_3$ ):  $\delta$  7.48-7.39 (m, 1H), 7.39-7.25 (m, 3H), 6.72-6.58 (m, 1H), 6.28 (q,  $J = 7.4, 6.8$  Hz, 1H), 5.34-5.23 (m, 1H), 5.17 (t,  $J = 8.9$  Hz, 1H), 2.71-2.60 (m, 2H), 2.23-2.10 (m, 2H), 2.04-1.91 (m, 2H).  $^{13}\text{C NMR}$  (101 MHz,  $\text{CDCl}_3$ ):  $\delta$  141.4, 141.2, 138.2, 137.4, 131.1, 128.8, 128.6, 127.1, 125.6, 114.2, 34.2, 31.9, 24.7.

### 3-Vinyl-1,2-dihydronaphthalene (**2n**)<sup>17</sup>

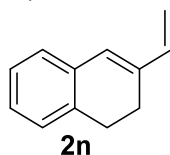

Prepared from 3.6 mmol of corresponding trifluoromethanesulfonate to afford 0.49 g (3.2 mmol, 87% yield) of **2n** as a colorless liquid.  $^1\text{H NMR}$  (400 MHz,  $\text{CDCl}_3$ ):  $\delta$  7.16 - 7.10 (m, 3H), 7.05 (ddd,  $J = 6.8, 1.5, 1.0$  Hz, 1H), 6.55 (ddd,  $J = 17.5, 10.5, 1.0$  Hz, 1H), 6.43 (dd,  $J = 1.3, 1.0$  Hz,

1H), 5.34 (dd,  $J = 17.5, 1.2$  Hz, 1H), 5.14 (dd,  $J = 10.5, 1.2$  Hz, 1H), 2.89 (t,  $J = 7.5$  Hz, 2H), 2.48 (dd,  $J = 7.5, 1.3$  Hz, 2H).  $^{13}\text{C}$  NMR (101 MHz,  $\text{CDCl}_3$ ):  $\delta$  138.5, 137.8, 135.7, 134.5, 128.2, 127.2, 127.0, 126.5, 112.7, 27.7, 22.3.

#### 4-(Prop-1-en-2-yl)-1,2-dihydronaphthalene (**2o**)<sup>18</sup>

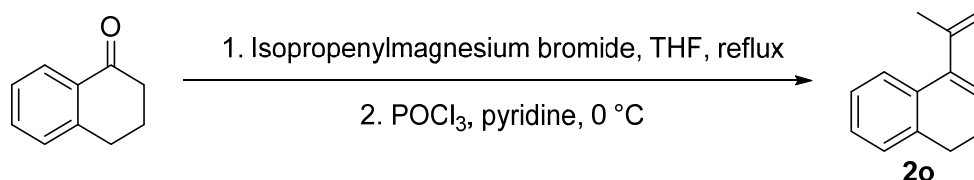

Step1:

To a solution of 1-tetralone (2.0 g, 13.7 mmol) in 20 mL dry THF, 2-propylmagnesium bromide (1.5 equiv.) was added dropwise. The reaction mixture was refluxed for 2 h. After cooling to room temperature, 30 mL saturated  $\text{NH}_4\text{Cl}$  solution was added to quench the reaction. The aqueous layer was extracted with  $\text{Et}_2\text{O}$  (15 mL  $\times$  3). The combined organic layer was dried over  $\text{MgSO}_4$ , concentrated in vacuo. The crude product was used without further purification.

Step2:

To a solution of the crude alcohol in 20 mL pyridine,  $\text{POCl}_3$  (1.5 equiv.) was added dropwise at 0 °C. the reaction mixture was allowed to warm to room temperature and stirred overnight. Ice water was carefully added to quench the reaction and the reaction mixture was extracted with  $\text{Et}_2\text{O}$ . The combined organic layer was dried over  $\text{MgSO}_4$ , concentrated in vacuo. The residue was purified by flash column chromatography to afford the desired product (1.1 g, 51% yield, 2 steps) as a colorless liquid.  $^1\text{H}$  NMR (400 MHz,  $\text{CDCl}_3$ ):  $\delta$  7.28-7.12 (m, 4H), 6.02 (t,  $J = 4.6$  Hz, 1H), 5.12 (s, 1H), 5.07 (s, 1H), 2.78 (t,  $J = 7.9$  Hz, 2H), 2.35-2.25 (m, 2H), 2.01-1.97 (m, 3H).  $^{13}\text{C}$  NMR (101 MHz,  $\text{CDCl}_3$ ):  $\delta$  144.6, 141.5, 136.9, 134.0, 127.6, 126.8, 126.3, 125.2, 125.0, 114.5, 28.4, 23.2, 22.9.

#### di-*tert*-butyl adipate<sup>19</sup>

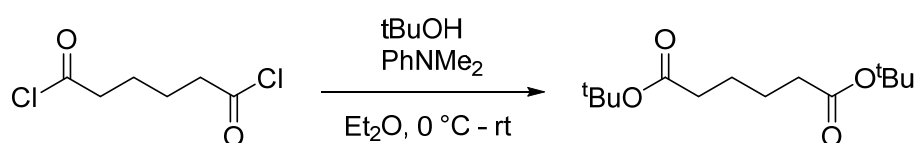



To a solution of <sup>t</sup>BuOH (41 mL, 437 mmol, 4 equiv.) and *N,N*-dimethylaniline (44 mL, 349 mmol, 4 equiv.) in Et<sub>2</sub>O (120 mL), adipoyl chloride (20 g, 109 mmol) in Et<sub>2</sub>O (20 mL) was added dropwise at 0 °C. The mixture was allowed to warm slowly to room temperature and stirred for 24 h. H<sub>2</sub>O (100 mL) was added and the aqueous layer was extracted with Et<sub>2</sub>O (30 mL × 3). The combined organic layer was washed sequentially with 1 M HCl (100 mL), 2 M NaOH (100 mL) and brine (100 mL), then dried over MgSO<sub>4</sub> and concentrated in vacuo. The residue was distilled in vacuo to give the desired product as a colorless liquid (20.5 g, 72% yield). **B.P.**: 103-105 °C (at 2.7 mbar). <sup>1</sup>H NMR (400 MHz, CDCl<sub>3</sub>): δ 2.27-2.21 (m, 4H), 1.66-1.59 (m, 4H), 1.45 (s, 18H).

### di-*tert*-Butyl heptanedioate<sup>20</sup>

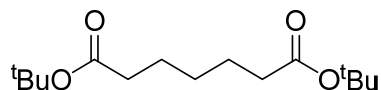

Prepared from 25.4 mmol of heptanedioyl dichloride to afford 5.34 g (19.6 mmol, 77% yield) of desired product as a colorless liquid. <sup>1</sup>H NMR (400 MHz, CDCl<sub>3</sub>): δ 2.35-2.31 (m, 4H), 1.72-1.68 (m, 6H), 1.52 (s, 18H).

### *tert*-Butyl 2-oxocyclopentanecarboxylate<sup>20</sup>

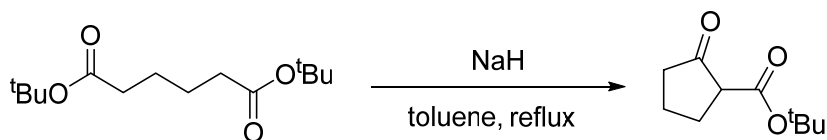

NaH (60% suspension in mineral oil, 6.7 g, 166.3 mmol) was suspended in toluene (80 mL). A solution of di-*tert*-butyladipate (1.3 g) in <sup>t</sup>BuOH (0.4 mL) and benzene (25 mL) was added. After refluxed for 30 min, more di-*tert*-butyladipate (19.2 g) a in benzene (40 mL) was added dropwise over 30 min. After the completion of the reaction, the reaction mixture was allowed to cool to room temperature before being cooled to 0 °C; AcOH (aq, 10%, 100 mL) was carefully added to the reaction mixture. The organic layer was separated, dried over MgSO<sub>4</sub> and concentrated in vacuo. The residue was distilled in vacuo to give the desired product as a colorless liquid (12.7 g, 87% yield). **B.P.**: 72-74 °C (at 2.7 mbar). <sup>1</sup>H NMR (400 MHz, CDCl<sub>3</sub>): δ 3.03 (td, *J* = 8.8, 0.6 Hz, 1H), 2.33-2.19 (m, 4H), 2.17-2.03 (m, 1H), 1.92-1.76 (m, 1H), 1.50 (s, 9H).

### ***tert*-Butyl 2-oxocyclohexanecarboxylate**<sup>21</sup>

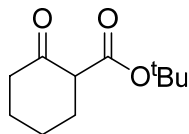

Prepared from 20.3 mmol of di-*tert*-butyl heptanedioate to afford 3.69 g (18.6 mmol, 92% yield) of desired product as a colorless liquid. <sup>1</sup>H NMR (400 MHz, CDCl<sub>3</sub>): δ 5.28 (s, 1H), 2.26-2.18 (m, 2H), 2.13 (d, *J* = 6.1 Hz, 2H), 1.70-1.59 (m, 2H), 1.55 (d, *J* = 6.3 Hz, 2H), 1.47 (s, 9H) ppm.

### **Adamantan-1-yl 2-oxocyclopentanecarboxylate**<sup>22</sup>

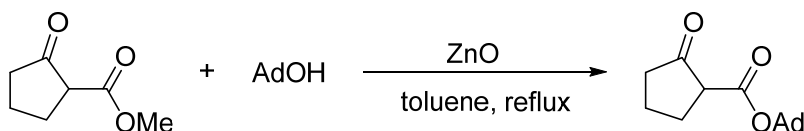

A solution of methyl 2-oxocyclopentanecarboxylate (2.7 g, 19.2 mmol), ZnO (2.33 g, 28.8 mmol, 1.5 equiv.) and 1-adamantanol (29.3 g, 96.0 mmol, 5 equiv.) in toluene (50 mL) was refluxed for 8 h. The reaction mixture was filtered and filtrate was concentrated, and was purified by flash column chromatography to give the desired product as a colorless liquid (3.5 g, 69% yield). <sup>1</sup>H NMR (400 MHz, CDCl<sub>3</sub>): δ 3.02 (t, *J* = 8.7 Hz, 1H), 2.31-2.18 (m, 4H), 2.19-2.02 (m, 10H), 1.82 (dp, *J* = 12.7, 8.3 Hz, 1H), 1.70-1.56 (m, 6H). <sup>13</sup>C NMR (101 MHz, CDCl<sub>3</sub>): δ 213.1, 168.5, 81.8, 55.9, 41.2, 38.2, 36.2, 30.9, 27.5, 21.0.

### ***tert*-Butyl 2-oxotetrahydrofuran-3-carboxylate**<sup>23</sup>

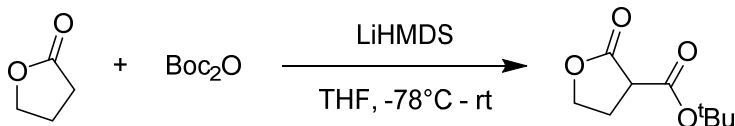

To a solution of  $\gamma$ -butyrolactone (3.0 g, 34.85 mmol) in 100 mL THF, LiHMDS (2 M, 26 mL, 1.5 equiv.) was added dropwise over 30 min at -78 °C. After stirring for 2 h at -78 °C, di-*tert*-butyl decarbonate was added in one portion, and the reaction mixture was allowed to warm to room temperature and stirred overnight. NH<sub>4</sub>Cl (50 mL) was added to the reaction mixture and the aqueous layer was extracted with Et<sub>2</sub>O (25 mL  $\times$  3). The combined organic layer was washed with brine (50 mL), then dried over MgSO<sub>4</sub> and concentrated in vacuo. The residue was purified by

flash column chromatography to give the desired product as a colorless liquid (5.32 g, 82% yield).

**<sup>1</sup>H NMR** (400 MHz, CDCl<sub>3</sub>) δ 4.44 (td, *J* = 5.7, 8.4 Hz, 1H), 4.35-4.24 (m, 1H), 3.43 (dd, *J* = 7.3, 9.4 Hz, 1H), 2.67-2.54 (m, 1H), 2.46 (dddd, *J* = 5.7, 7.7, 9.4, 13.2 Hz, 1H), 1.49 (s, 9H). **<sup>13</sup>C NMR** (101 MHz, CDCl<sub>3</sub>) δ 172.8, 166.9, 82.8, 67.2, 46.9, 27.8, 26.4.

### Synthesis of unsaturated β-keto esters

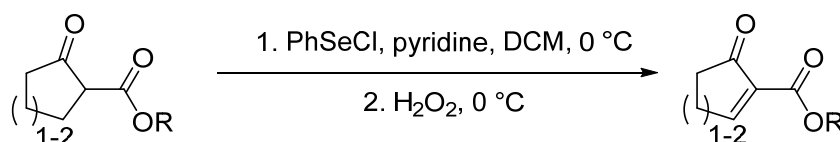

### General procedure<sup>24</sup>

To a solution of PhSeCl (1.1 equiv.) and pyridine (1.5 equiv.) in DCM (50 mL), 2-oxocyclopentane-1-carboxylate (1 equiv.) was added dropwise at 0 °C. After stirring for 5 h, 1 M HCl (50 mL) was added to quench the reaction. The separated organic layer was washed with saturated aqueous NaHCO<sub>3</sub> and dried over MgSO<sub>4</sub>. The solution was placed in round-bottom flask and cooled to 0 °C, and 35% H<sub>2</sub>O<sub>2</sub> (aq, 3 equiv.) was added dropwise. After stirring at the same temperature for another 5 h, the resulting mixture was washed with H<sub>2</sub>O (50 mL) and saturated aqueous NaHCO<sub>3</sub> (50 mL) and dried over MgSO<sub>4</sub> and concentrated in vacuo. The crude product was used without further purification.

### Adamantan-1-yl 5-oxocyclopent-1-enecarboxylate (**1a**)

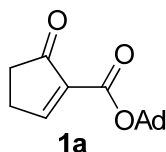

Prepared from 6.8 mmol of adamantan-1-yl 2-oxocyclopentane-1-carboxylate to afford 1.56 g (6.0 mmol, 88% yield) of **1a** as a viscous liquid. **<sup>1</sup>H NMR** (400 MHz, CDCl<sub>3</sub>): δ 8.26 (td, *J* = 2.7, 1.1, 1H), 2.72-2.64 (m, 2H), 2.55-2.48 (m, 2H), 2.18 (s, 9H), 1.73-1.65 (m, 6H). **<sup>13</sup>C NMR** (101 MHz, CDCl<sub>3</sub>): δ 203.3, 170.7, 160.8, 138.6, 82.0, 41.4, 36.2, 35.8, 30.9, 26.3. **IR** (KBr):  $\nu_{\max}$  2908, 2854, 1700, 1611, 1279, 1050, 825, 784 cm<sup>-1</sup>. **MS** (EI): (relative intensity): *m/z* 260 (M<sup>+</sup>), 135 (100), 109 (32.2), 92 (63.49), 79 (24.85), 53 (15.76). **HRMS** (ESI) For [C<sub>16</sub>H<sub>24</sub>NO<sub>3</sub>]<sup>+</sup> ([M+NH<sub>4</sub>]<sup>+</sup>): Calcd.: 278.1756, Found: 278.1746.

**Methyl 5-oxocyclopent-1-enecarboxylate (1b)**<sup>25</sup>

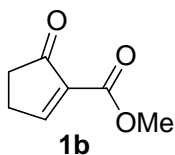

Prepared from 7.0 mmol of ethyl 2-oxocyclopentane-1-carboxylate to afford 0.83 g (5.9 mmol, 84% yield) of **1b** as a pale-yellow liquid. <sup>1</sup>H NMR (400 MHz, CDCl<sub>3</sub>): δ 8.40 (t, *J* = 2.7 Hz, 1H), 3.80 (s, 3H), 2.72 (dt, *J* = 7.3, 2.5 Hz, 2H), 2.53 (dt, *J* = 6.7, 2.2 Hz, 2H). <sup>13</sup>C NMR (101 MHz, CDCl<sub>3</sub>): δ 203.0, 172.7, 162.3, 137.1, 52.0, 35.7, 26.7.

***tert*-Butyl 5-oxocyclopent-1-enecarboxylate (1c)**<sup>25</sup>

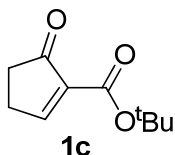

Prepared from 14.2 mmol of *tert*-butyl 2-oxocyclopentane-1-carboxylate to afford 2.52 g (13.8 mmol, 97% yield) of **1c** as a viscous liquid. <sup>1</sup>H NMR (400 MHz, CDCl<sub>3</sub>): δ 8.27 (tq, *J* = 2.5, 1.3 Hz, 1H), 2.74-2.64 (m, 2H), 2.55-2.47 (m, 2H), 1.49 (s, 9H).

***tert*-Butyl 6-oxocyclohex-1-enecarboxylate (1d)**<sup>26</sup>

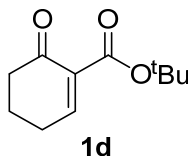

Prepared from 3.6 mmol of *tert*-butyl 2-oxocyclohexane-1-carboxylate to afford 0.85 g (3.3 mmol, 90% yield) of **1d** as a pale-yellow liquid. <sup>1</sup>H NMR (400 MHz, CDCl<sub>3</sub>): δ 7.51 (s, 1H), 2.50-2.33 (m, 4H), 2.07-1.94 (m, 2H), 1.45 (s, 9H).

***tert*-Butyl 2-oxo-2,5-dihydrofuran-3-carboxylate (1e)**

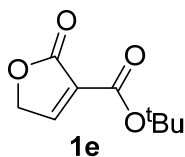

Prepared from 5.4 mmol of *tert*-butyl 2-oxotetrahydrofuran-3-carboxylate to afford 0.98 g (5.3 mmol, 99% yield) of **1e** as a pale-yellow liquid. <sup>1</sup>H NMR (400 MHz, CDCl<sub>3</sub>) δ 8.14 (d, *J* = 1.8 Hz, 1H), 4.87 (d, *J* = 1.7 Hz, 2H), 1.50 (s, 9H). <sup>13</sup>C NMR (101 MHz, CDCl<sub>3</sub>) δ 168.3, 159.0, 158.7, 126.8, 82.9, 69.0, 28.0, 27.8.

### *tert*-Butyl 2-benzoylacrylate (**1f**)<sup>27</sup>

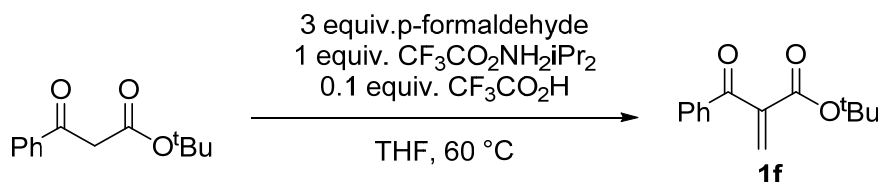

Unsaturated β keto ester **1f** was synthesized by a modified protocol reported in the literature.<sup>27</sup> To a solution of *tert*-butyl 3-oxo-3-phenylpropanoate (1.0 g, 4.5 mmol) and p-formaldehyde (0.41 g, 13.6 mmol, 3 equiv.) in dry THF (20 mL), CF<sub>3</sub>COONH<sub>2</sub><sup>i</sup>Pr<sub>2</sub> (0.98 g, 4.5 mmol, 1 equiv.) and CF<sub>3</sub>COOH (34 μL, 0.1 equiv.) were added and the mixture was warmed to 60 °C and stirred overnight. H<sub>2</sub>O (30 mL) was added to the mixture, and the aqueous layer was extracted with Et<sub>2</sub>O (10 mL × 3). The combined organic layer was washed sequentially with 1 M HCl (50 mL), 1 M NaOH (50 mL) and brine (50 mL), then dried over MgSO<sub>4</sub> and concentrated in vacuo. The residue was purified by flash column chromatography to give the desired product as a colorless liquid (0.9 g, 85% yield). <sup>1</sup>H NMR (400 MHz, CDCl<sub>3</sub>): δ 7.83 (d, *J* = 7.3 Hz, 2H), 7.60-7.55 (m, 1H), 7.48-7.42 (m, 2H), 6.58 (s, 1H), 6.05 (s, 1H), 1.34 (s, 9H). <sup>13</sup>C NMR (101 MHz, CDCl<sub>3</sub>): δ 193.7, 163.4, 143.3, 136.7, 133.3, 130.7, 129.0, 128.4, 82.3, 27.7.

### Adamantan-1-yl 2-benzoylacrylate (**1g**)

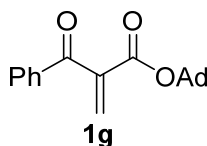

Prepared from 3.35 mmol of adamantan-1-yl 3-oxo-3-phenylpropanoate to afford 0.84 g (2.71 mmol, 81% yield) of **1g** as a colorless liquid. <sup>1</sup>H NMR (400 MHz, CDCl<sub>3</sub>): δ 7.86-7.80 (m, 2H), 7.57 (t, *J* = 7.3 Hz, 1H), 7.46 (t, *J* = 7.6 Hz, 2H), 6.56 (s, 1H), 6.02 (s, 1H), 2.16-2.02 (m, 3H), 2.00-1.95 (m, 6H), 1.66-1.49 (m, 6H). <sup>13</sup>C NMR (101 MHz, CDCl<sub>3</sub>): δ 193.8, 163.2, 143.6, 136.9, 133.3, 130.5, 129.2, 128.5, 82.4, 41.1, 36.1, 30.9. IR (KBr): ν<sub>max</sub> 2911, 2854, 1712, 1668, 1329,

1227, 1156, 1051, 972, 964, 726  $\text{cm}^{-1}$ . **MS** (EI): (relative intensity):  $m/z$  310 ( $\text{M}^+$ ), 135 (100), 105 (63.1), 92 (34.15), 77 (40.8). **HRMS** (EI) For  $[\text{C}_{20}\text{H}_{22}\text{O}_3]^+$  ( $\text{M}^+$ ): Calcd.: 310.1569, Found: 310.1564.

### 3. General experimental procedure for Fe-BPsalan complexes catalyzed asymmetric Diels-Alder reaction of alkylidene $\beta$ -ketoesters

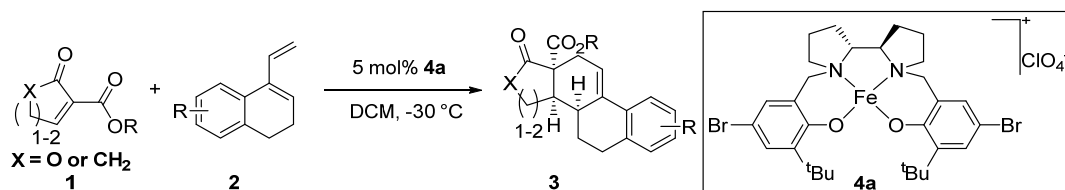

The unsaturated  $\beta$ -keto ester (0.2 mmol) and Fe-BPsalan complex (0.01 mmol, 5 mol%) were dissolved in dry DCM under Ar atmosphere at room temperature. After stirring for 30 min, diene (**2** equiv.) was added at the given temperature. After the completion of the reaction, the reaction mixture was concentrated, and the product was purified by flash column chromatography. The ee of the product was determined by chiral HPLC.

#### (8*S*,13*R*,14*R*)-Adamantan-1-yl 17-oxo-7,8,12,13,14,15,16,17-octahydro-6*H*-cyclopenta[*a*]phenanthrene-13-carboxylate (**3a**)

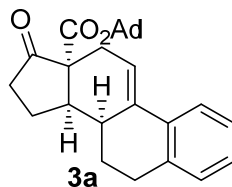

81 mg, viscous liquid, 97% yield, 8:1 dr, 90%, >99% ee.  $^1\text{H}$  NMR (400 MHz, Chloroform-*d*)  $\delta$  7.65 – 7.56 (m, 1H), 7.23 – 7.03(m, 2H), 6.32 (q,  $J = 3.7$  Hz, 1H), 3.00 (dt,  $J = 12.3, 6.1$  Hz, 1H), 2.92 – 2.81 (m, 3H), 2.65 – 2.54 (m, 1H), 2.54 – 2.21 (m, 4H), 2.21 – 2.07 (m, 9H), 2.07 – 1.90 (m, 3H), 1.73-1.48 (m, 7H).  $^{13}\text{C}$  NMR (101 MHz, Chloroform-*d*)  $\delta$  214.26, 170.28, 136.83, 133.95, 133.92, 129.26, 127.04, 126.28, 123.31, 116.73, 81.85, 59.90, 44.76, 41.27, 37.10, 36.24, 34.75, 30.95, 30.21, 26.61, 25.47, 21.52. **IR** (KBr):  $\nu_{\text{max}}$  2911, 2852, 1749, 1723, 1456, 1231, 1054  $\text{cm}^{-1}$ . **MS** (EI): (relative intensity):  $m/z$  416 ( $\text{M}^+$ ), 135 (100), 93 (8.36), 79 (8.9). **HRMS** (ESI) For  $[\text{C}_{28}\text{H}_{33}\text{O}_3]^+$  ( $[\text{M}+\text{H}]^+$ ): Calcd.: 417.2430, Found: 417.2425. **HPLC**: Daicel Chiral AD-H, Hexane/ $i$ PrOH = 99/1, 0.7 mL/min,

214 nm, retention times  $t_R$  (*exo* diastereoisomer, minor) = 29.6 min,  $t_R$  (*exo* diastereoisomer, major) = 41.5 min,  $t_R$  (*endo* diastereoisomer, major) = 46.1 min,  $t_R$  (*endo* diastereoisomer, minor) = 65.8 min, 90% ee (*exo*), >99% ee (*endo*), dr (*exo:endo*) = 8:1.  $[\alpha]_D^{20} = 100.44$  ( $c = 0.95$ ,  $\text{CHCl}_3$ ).

**(8*S*,13*R*,14*R*)-Adamantan-1-yl 3-methoxy-17-oxo-7,8,12,13,14,15,16,17-octahydro-6*H*-cyclopenta[*a*]phenanthrene-13-carboxylate (3b)**

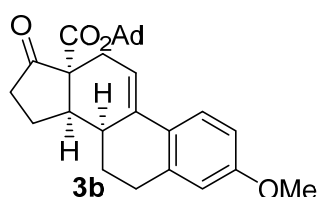

89 mg, viscous liquid, 99% yield, 12:1 dr, 91%, 94% ee.  $^1\text{H NMR}$  (400 MHz, Chloroform-*d*)  $\delta$  7.53 (d,  $J = 8.8$  Hz, 1H), 6.73 (dd,  $J = 8.8, 2.7$  Hz, 1H), 6.61 (d,  $J = 2.7$  Hz, 1H), 6.16 (q,  $J = 3.7$  Hz, 1H), 3.79 (s, 3H), 2.98 (dt,  $J = 12.2, 6.1$  Hz, 1H), 2.93 – 2.76 (m, 3H), 2.61 – 2.21 (m, 4H), 2.17 – 2.05 (m, 9H), 2.05 – 1.90 (m, 2H), 1.67 – 1.51 (m, 8H).  $^{13}\text{C NMR}$  (101 MHz, Chloroform-*d*)  $\delta$  214.19, 170.23, 158.57, 138.14, 133.36, 126.86, 124.65, 114.29, 113.23, 112.77, 81.67, 59.84, 55.29, 44.61, 41.19, 37.00, 36.17, 34.61, 30.87, 30.42, 26.62, 25.22, 21.42. **IR** (KBr):  $\nu_{\text{max}}$  2908, 2851, 1749, 1717, 1603, 1497, 1456, 1232, 1202, 1167, 1058, 826  $\text{cm}^{-1}$ . **MS** (EI): (relative intensity):  $m/z$  446 ( $\text{M}^+$ ), 267 (40.2), 135 (100). **HRMS** (ESI) For  $[\text{C}_{29}\text{H}_{35}\text{O}_4]^+$  ( $[\text{M}+\text{H}]^+$ ): Calcd.: 447.2535, Found: 447.2526. **HPLC**: Daicel Chiral IF3, Hexane/ $i$ PrOH = 90/10, 0.7 mL/min, 214 nm, retention times  $t_R$  (*exo* diastereoisomer, minor) = 16.5 min,  $t_R$  (*exo* diastereoisomer, major) = 21.2 min,  $t_R$  (*endo* diastereoisomer, minor) = 24.6 min,  $t_R$  (*endo* diastereoisomer, major) = 26.4 min. 91% ee (*exo*), 94% ee (*endo*), dr (*exo:endo*) = 12:1.  $[\alpha]_D^{20} = 141.50$  ( $c = 1.01$ ,  $\text{CHCl}_3$ ).

**(8*S*,13*R*,14*R*)-Adamantan-1-yl 2-methoxy-17-oxo-7,8,12,13,14,15,16,17-octahydro-6*H*-cyclopenta[*a*]phenanthrene-13-carboxylate (3c)**

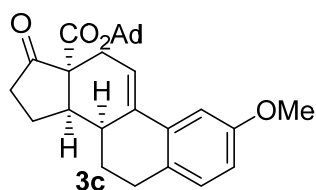

78 mg, viscous liquid, 87% yield, 9:1 dr, 90%, 85% ee.  $^1\text{H NMR}$  (400 MHz, Chloroform-*d*)  $\delta$  7.11 (d,  $J = 2.7$  Hz, 1H), 7.01 (d,  $J = 8.6$  Hz, 1H), 6.73 (dd,  $J = 8.4, 2.7$  Hz, 1H), 6.30 (q,  $J = 3.8$  Hz, 1H), 3.79 (s, 3H), 3.00 (dt,  $J = 12.3, 6.1$  Hz, 1H), 2.94 – 2.69 (m, 3H), 2.57 (dd,  $J = 13.1, 5.9$  Hz, 1H), 2.52 – 2.35 (m, 2H), 2.29 (dt,  $J = 18.8, 3.6$  Hz, 1H), 2.23 – 2.04 (m, 9H), 2.04 – 1.81 (m, 2H), 1.77 – 1.38 (m, 8H).  $^{13}\text{C NMR}$  (101 MHz, Chloroform-*d*)  $\delta$  214.22, 170.23, 158.07, 134.77, 134.08, 130.10, 129.36, 116.92, 113.87, 107.52, 81.80, 59.84, 55.39, 44.75, 41.21, 37.06, 36.19, 34.67, 30.90, 29.33, 26.85, 25.43, 21.50. **IR** (KBr):  $\nu_{\text{max}}$  2906, 2849, 1741, 1719, 1610, 1572, 1492, 1282, 1232, 1054  $\text{cm}^{-1}$ . **MS** (EI): (relative intensity):  $m/z$  446( $\text{M}^+$ ), 135(100), 93(11.91), 79(12.01), 44(20.82). **HRMS** (ESI) For  $[\text{C}_{29}\text{H}_{35}\text{O}_4]^+$  ( $[\text{M}+\text{H}]^+$ ): Calcd.: 447.2535, Found: 447.2525. **HPLC**: Daicel Chiral IA, Hexane/ $^i$ PrOH = 85/15, 0.7 mL/min, 214 nm, retention times  $t_{\text{R}}$  (*exo* diastereoisomer, minor) = 9.8 min,  $t_{\text{R}}$  (*endo* diastereoisomer, minor) = 15.0 min,  $t_{\text{R}}$  (*endo* diastereoisomer, major) = 16.0 min,  $t_{\text{R}}$  (*exo* diastereoisomer, major) = 18.8 min. 90% ee (*exo*), 85% ee (*endo*), dr (*exo:endo*) = 9:1.  $[\alpha]_{\text{D}}^{20} = 135.64$  ( $c = 1.02$ ,  $\text{CHCl}_3$ ).

**(8*S*,13*R*,14*R*)-Adamantan-1-yl 4-methoxy-17-oxo-7,8,12,13,14,15,16,17-octahydro-6*H*-cyclopenta[*a*]phenanthrene-13-carboxylate (3d)**

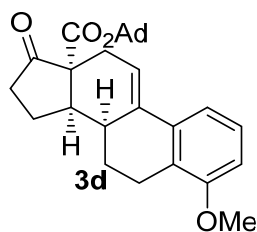

82 mg, viscous liquid, 92% yield, 6:1 dr, 90%, 78% ee.  $^1\text{H NMR}$  (400 MHz, Chloroform-*d*)  $\delta$  7.24 (d,  $J = 7.8$  Hz, 1H), 7.12 (t,  $J = 7.9$  Hz, 1H), 6.71 (d,  $J = 8.0$  Hz, 1H), 6.33 (q,  $J = 3.6$  Hz, 1H), 3.82 (s, 3H), 3.10 (ddd,  $J = 17.2, 4.9, 2.2$  Hz, 1H), 3.00 (dt,  $J = 12.4, 6.2$  Hz, 1H), 2.94 – 2.83 (m, 1H), 2.51 (dp,  $J = 17.4, 5.6$  Hz, 3H), 2.37 (ddd,  $J = 19.2, 11.5, 8.8$  Hz, 1H), 2.22 (dt,  $J = 18.8, 3.4$  Hz, 1H), 2.16 – 2.06 (m, 9H), 2.00 (dd,  $J = 19.3, 6.5$  Hz, 2H), 1.69 – 1.54 (m, 8H).  $^{13}\text{C NMR}$  (101 MHz, Chloroform-*d*)  $\delta$  214.09, 170.10, 157.24, 135.08, 133.73, 126.31,



125.74, 116.85, 115.69, 108.09, 81.74, 59.69, 55.51, 44.34, 41.23, 36.84, 36.22, 33.61, 30.92, 26.11, 25.15, 23.03, 21.44. **IR** (KBr):  $\nu_{\max}$  2910, 2853, 1750, 1724, 1575, 1259, 1055, 781  $\text{cm}^{-1}$ . **MS** (EI): (relative intensity):  $m/z$  446 ( $\text{M}^+$ ), 340 (34.19), 267 (100), 238 (25.12), 210 (47.39), 171 (25.23), 165 (34.93), 152 (21.52), 97 (22.6), 85 (25.14), 71 (36.81), 57 (54.93). **HRMS** (ESI) For  $[\text{C}_{29}\text{H}_{35}\text{O}_4]^+$  ( $[\text{M}+\text{H}]^+$ ): Calcd.: 447.2535, Found: 447.2528. **HPLC**: Daicel Chiral IG, Hexane/ $i$ PrOH = 80/20, 0.7 mL/min, 214 nm, retention times  $t_R$  (*exo* diastereoisomer, minor) = 11.8 min,  $t_R$  (*endo* diastereoisomer, minor) = 14.1 min,  $t_R$  (*endo* diastereoisomer, major) = 14.9 min,  $t_R$  (*exo* diastereoisomer, major) = 19.9 min. 90% ee (*exo*), 78% ee (*endo*), dr (*exo:endo*) = 6:1.  $[\alpha]_{\text{D}}^{20} = 122.45$  ( $c = 1.05$ ,  $\text{CHCl}_3$ ).

**(8*S*,13*R*,14*R*)-Adamantan-1-yl 2,3-dimethoxy-17-oxo-7,8,12,13,14,15,16,17-octahydro-6*H*-cyclopenta[*a*]phenanthrene-13-carboxylate (3e)**

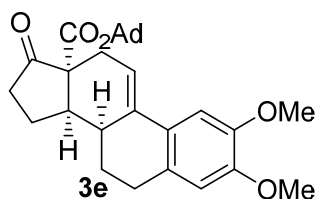

90 mg, viscous liquid, 94% yield, 10:1 dr, 90%, 96% ee.  $^1\text{H NMR}$  (400 MHz, Chloroform-*d*)  $\delta$  7.07 (s, 1H), 6.56 (s, 1H), 6.13 (q,  $J = 3.7$  Hz, 1H), 3.86 (d,  $J = 6.8$  Hz, 6H), 2.98 (dt,  $J = 12.2$ , 6.1 Hz, 1H), 2.92 – 2.70 (m, 3H), 2.44 (dddd,  $J = 50.5$ , 19.0, 12.1, 7.0 Hz, 3H), 2.25 (dt,  $J = 18.8$ , 3.4 Hz, 1H), 2.19 – 2.06 (m, 9H), 2.06 – 1.90 (m, 2H), 1.73 – 1.53 (m, 8H).  $^{13}\text{C NMR}$  (101 MHz, Chloroform-*d*)  $\delta$  214.22, 170.26, 148.52, 147.60, 133.63, 129.54, 126.34, 114.45, 111.41, 105.96, 81.80, 59.85, 55.99, 55.94, 44.67, 41.25, 37.03, 36.21, 34.41, 30.92, 29.75, 26.94, 25.22, 21.50. **MS** (EI): (relative intensity):  $m/z$  476 ( $\text{M}^+$ ), 297 (100), 135 (95.46), 93 (28.17), 79 (29.52), 67 (12.96). **HRMS** (ESI) For  $[\text{C}_{30}\text{H}_{37}\text{O}_5]^+$  ( $[\text{M}+\text{H}]^+$ ): Calcd.: 477.2641, Found: 477.2633. **HPLC**: Daicel Chiral AD-H, Hexane/ $i$ PrOH = 80/20, 0.7 mL/min, 254 nm, retention times  $t_R$  (*exo* diastereoisomer, minor) = 16.6 min,  $t_R$  (*endo* diastereoisomer, minor) = 30.9 min,  $t_R$  (*endo* diastereoisomer, major) = 33.9 min,  $t_R$  (*exo* diastereoisomer, major) = 36.5 min. 90% ee (*exo*), 96% ee (*endo*), dr (*exo:endo*) = 10:1.  $[\alpha]_{\text{D}}^{20} = 175.33$  ( $c = 1.08$ ,  $\text{CHCl}_3$ ).

**(8*S*,13*R*,14*R*)-Adamantan-1-yl 3-isopropoxy-17-oxo-7,8,12,13,14,15,16,17-octahydro-6*H*-cyclopenta[*a*]phenanthrene-13-carboxylate (3f)**

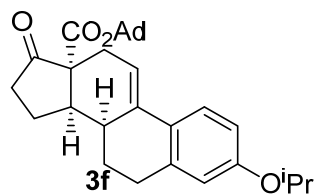

89 mg, viscous liquid, 94% yield, 10:1 dr, 90%, 96% ee.  $^1\text{H NMR}$  (400 MHz, Chloroform-*d*)  $\delta$  7.51 (d,  $J = 8.8$  Hz, 1H), 6.70 (dd,  $J = 8.8, 2.7$  Hz, 1H), 6.60 (d,  $J = 2.6$  Hz, 1H), 6.15 (q,  $J = 3.8$  Hz, 1H), 4.53 (hept,  $J = 6.0$  Hz, 1H), 2.98 (dt,  $J = 12.2, 6.2$  Hz, 1H), 2.92 – 2.71 (m, 3H), 2.64 – 2.20 (m, 5H), 2.19 – 1.86 (m, 11H), 1.64 (s, 7H), 1.32 (dd,  $J = 6.1, 2.2$  Hz, 6H).  $^{13}\text{C NMR}$  (101 MHz, Chloroform-*d*)  $\delta$  214.28, 170.28, 156.93, 138.19, 133.44, 126.70, 124.66, 115.45, 114.35, 114.21, 81.73, 69.80, 59.90, 44.66, 41.25, 37.05, 36.23, 34.65, 30.93, 30.45, 26.70, 25.27, 22.23, 22.18, 21.47. **IR** (KBr):  $\nu_{\text{max}}$  2973, 2911, 2853, 1750, 1724, 1605, 1495, 1232, 1115, 1055, 1007, 967  $\text{cm}^{-1}$ . **MS** (EI): (relative intensity):  $m/z$  474 ( $\text{M}^+$ ), 295 (100), 253 (25.26), 135 (87.96), 107 (10.36), 93 (21.73), 79 (23.81). **HRMS** (ESI) For  $[\text{C}_{31}\text{H}_{39}\text{O}_4]^+$  ( $[\text{M}+\text{H}]^+$ ): Calcd.: 475.2843, Found: 475.2841. **HPLC**: Daicel Chiral IA, Hexane/ $^i\text{PrOH} = 98/2$ , 0.7 mL/min, 214 nm, retention times  $t_{\text{R}}$  (*exo* diastereoisomer, minor) = 17.1 min,  $t_{\text{R}}$  (*endo* diastereoisomer, minor) = 18.9 min,  $t_{\text{R}}$  (*exo* diastereoisomer, major) = 23.0 min,  $t_{\text{R}}$  (*endo* diastereoisomer, major) = 26.6 min. 90% ee (*exo*), 96% ee (*endo*), dr (*exo:endo*) = 10:1.  $[\alpha]_{\text{D}}^{20} = 87.54$  ( $c = 0.95$ ,  $\text{CHCl}_3$ ).

**(8*S*,13*R*,14*R*)-Adamantan-1-yl 3-(benzyloxy)-17-oxo-7,8,12,13,14,15,16,17-octahydro-6*H*-cyclopenta[*a*]phenanthrene-13-carboxylate (3g)**

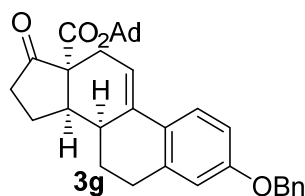

74 mg, viscous liquid, 94% yield, 13:1 dr, 90%, 95% ee.  $^1\text{H NMR}$  (400 MHz, Chloroform-*d*)  $\delta$  7.54 (d,  $J = 8.8$  Hz, 1H), 7.51 – 7.28 (m, 5H), 6.81 (d,  $J = 8.8$  Hz, 1H), 6.71 (s, 1H), 6.17 (s, 1H), 5.05 (s, 2H), 3.00 (dt,  $J = 12.2, 6.0$  Hz, 1H), 2.86 (d,  $J = 17.3$  Hz, 3H), 2.44 (ddt,  $J = 66.4, 47.8, 11.9$  Hz, 4H), 2.13 (d,  $J = 21.0$  Hz, 9H), 2.04 – 1.87 (m, 2H), 1.65 (s, 8H).  $^{13}\text{C NMR}$  (101 MHz, Chloroform-*d*)  $\delta$  214.23, 170.26, 157.83, 138.21, 137.09, 133.37, 128.66, 128.02, 127.52, 127.15,

124.69, 114.48, 114.35, 113.53, 81.73, 69.99, 59.87, 44.63, 41.22, 37.03, 36.20, 34.62, 30.90, 30.44, 26.63, 25.26, 21.45. **IR** (KBr):  $\nu_{\max}$  2909, 2851, 1747, 1718, 1606, 1569, 1497, 1455, 1237, 1100, 1061, 804, 696  $\text{cm}^{-1}$ . **MS** (EI): (relative intensity):  $m/z$  522 ( $\text{M}^+$ ), 343 (91.63), 135 (100), 91 (97.1), 79 (23.59). **HRMS** (ESI) For  $[\text{C}_{35}\text{H}_{39}\text{O}_4]^+$  ( $[\text{M}+\text{H}]^+$ ): Calcd.: 523.2848, Found: 523.2844. **HPLC**: Daicel Chiral IC, Hexane/ $i$ PrOH = 80/20, 0.7 mL/min, 214 nm, retention times  $t_R$  (*exo* diastereoisomer, minor) = 17.1 min,  $t_R$  (*endo* diastereoisomer, major) = 19.5 min,  $t_R$  (*exo* diastereoisomer, major) = 20.8 min  $t_R$  (*endo* diastereoisomer, minor) = 26.8 min, 90% ee (*exo*), 95% ee (*endo*), dr (*exo:endo*) = 13:1.  $[\alpha]_{\text{D}}^{20} = 130.02$  ( $c = 0.96$ ,  $\text{CHCl}_3$ ).

**(8*S*,13*R*,14*R*)-Adamantan-1-yl 2,4-dimethyl-17-oxo-7,8,12,13,14,15,16,17-octahydro-6*H*-cyclopenta[*a*]phenanthrene-13-carboxylate (3h)**

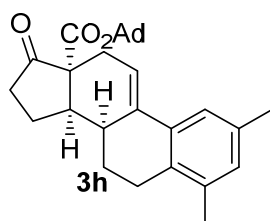

87 mg, viscous liquid, 98% yield, 9:1 dr, 90%, 95% ee.  **$^1\text{H}$  NMR** (400 MHz, Chloroform-*d*)  $\delta$  7.32 (s, 1H), 6.88 (s, 1H), 6.31 (d,  $J = 4.6$  Hz, 1H), 3.00 (dt,  $J = 12.4, 6.2$  Hz, 1H), 2.94 – 2.74 (m, 2H), 2.74 – 2.32 (m, 5H), 2.28 (s, 4H), 2.21 (s, 3H), 2.18 (s, 1H), 2.17 – 1.99 (m, 11H), 1.64 (s, 7H).  **$^{13}\text{C}$  NMR** (126 MHz, Chloroform-*d*)  $\delta$  214.16, 170.13, 136.37, 135.09, 134.33, 133.83, 132.30, 129.78, 121.87, 116.09, 81.74, 59.77, 44.40, 41.28, 36.92, 36.26, 33.78, 30.96, 26.63, 26.46, 25.30, 21.48, 21.24, 19.83. **IR** (KBr):  $\nu_{\max}$  2907, 2854, 1749, 1724, 1455, 1325, 1171, 1054, 831, 802  $\text{cm}^{-1}$ . **MS** (EI): (relative intensity):  $m/z$  444 ( $\text{M}^+$ ), 191 (14.75), 135 (100), 95 (29.71). **HRMS** (ESI) For  $[\text{C}_{30}\text{H}_{37}\text{O}_3]^+$  ( $[\text{M}+\text{H}]^+$ ): Calcd.: 445.2743, Found: 445.2732. **HPLC**: Daicel Chiral IF3, Hexane/ $i$ PrOH = 96/4, 0.7 mL/min, 214 nm, retention times  $t_R$  (*exo* diastereoisomer, minor) = 10.9 min,  $t_R$  (*endo* diastereoisomer, minor) = 12.2 min,  $t_R$  (*exo* diastereoisomer, major) = 14.9 min.,  $t_R$  (*endo* diastereoisomer, major) = 15.9 min. 90% ee (*exo*), 95% ee (*endo*), dr (*exo:endo*) = 9:1.  $[\alpha]_{\text{D}}^{20} = 138.25$  ( $c = 1.10$ ,  $\text{CHCl}_3$ ).

**(8*S*,13*R*,14*R*)-Adamantan-1-yl 17-oxo-3-phenyl-7,8,12,13,14,15,16,17-octahydro-**

### 6*H*-cyclopenta[*a*]phenanthrene-13-carboxylate (**3i**)

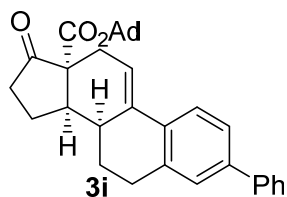

89 mg, viscous liquid, 90% yield, 7:1 dr, 90%, 95% ee. **<sup>1</sup>H NMR** (400 MHz, Chloroform-*d*) δ 7.68 (d, *J* = 8.3 Hz, 1H), 7.59 (d, *J* = 7.5 Hz, 2H), 7.42 (q, *J* = 7.5 Hz, 3H), 7.33 (dd, *J* = 7.3, 4.3 Hz, 2H), 6.37 (q, *J* = 3.6 Hz, 1H), 3.02 (dt, *J* = 12.1, 6.1 Hz, 1H), 2.98 – 2.84 (m, 3H), 2.69 – 2.57 (m, 1H), 2.57 – 2.21 (m, 4H), 2.19 – 2.05 (m, 11H), 1.65 (s, 7H). **<sup>13</sup>C NMR** (101 MHz, Chloroform-*d*) δ 214.22, 170.28, 140.83, 139.76, 137.19, 133.65, 133.07, 128.86, 127.80, 127.35, 127.02, 125.13, 123.84, 116.91, 81.90, 59.90, 44.73, 41.29, 37.09, 36.25, 34.77, 30.96, 30.40, 26.66, 25.51, 21.52. **IR** (KBr):  $\nu_{\max}$  2909, 2852, 1745, 1720, 1483, 1271, 1232, 1205, 1057, 905, 726, 699 cm<sup>-1</sup>. **MS** (EI): (relative intensity): *m/z* 492 (M<sup>+</sup>), 314 (10.79), 135 (100), 95 (13.02), 79 (12.67). **HRMS** (ESI) For [C<sub>34</sub>H<sub>37</sub>O<sub>3</sub>]<sup>+</sup> ([M+H]<sup>+</sup>): Calcd.: 493.2743, Found: 493.2736. **HPLC**: Daicel Chiral AD-H, Hexane/<sup>i</sup>PrOH = 90/10, 0.7 mL/min, 214 nm, retention times *t<sub>R</sub>* (*exo* diastereoisomer, minor) = 12.9 min, *t<sub>R</sub>* (*endo* diastereoisomer, minor) = 15.5 min, *t<sub>R</sub>* (*exo* diastereoisomer, major) = 16.9 min, *t<sub>R</sub>* (*endo* diastereoisomer, major) = 19.6 min. 90% ee (*exo*), 95% ee (*endo*), dr (*exo:endo*) = 7:1. [ $\alpha$ ]<sub>D</sub><sup>20</sup> = 98.37 (*c* = 1.00, CHCl<sub>3</sub>).

### (8*S*,13*R*,14*R*)-Adamantan-1-yl 2-chloro-17-oxo-7,8,12,13,14,15,16,17-octahydro-6*H*-cyclopenta[*a*]phenanthrene-13-carboxylate (**3j**)

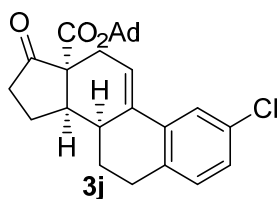

70 mg, viscous liquid, 78% yield, 5:1 dr, 84%, 86% ee. **<sup>1</sup>H NMR** (400 MHz, Chloroform-*d*) δ 7.55 (d, *J* = 2.1 Hz, 1H), 7.07 (dd, *J* = 8.2, 2.1 Hz, 1H), 7.01 (d, *J* = 8.4 Hz, 1H), 6.28 (dq, *J* = 14.6, 3.4, 2.9 Hz, 1H), 3.00 (dt, *J* = 12.2, 6.1 Hz, 1H), 2.94 – 2.71 (m, 3H), 2.63 – 2.22 (m, 4H), 2.19 – 1.91 (m, 11H), 1.68 – 1.46 (m, 8H). **<sup>13</sup>C NMR** (101 MHz, Chloroform-*d*) δ 213.94, 170.17, 135.14, 133.12, 132.08, 130.54, 126.93, 123.31, 118.15, 81.99, 77.16, 59.75, 44.60, 41.27, 37.03, 36.22, 34.50, 30.95, 29.65, 26.39, 25.46, 21.48. **IR** (KBr):  $\nu_{\max}$  2912,

2853, 1951, 1705, 1478, 1204, 1053, 800  $\text{cm}^{-1}$ . **MS** (EI): (relative intensity):  $m/z$  450 ( $\text{M}^+$ ), 135 (100), 93 (10.9), 79 (12.5). **HRMS** (ESI) For  $[\text{C}_{28}\text{H}_{32}^{35}\text{ClO}_3]^+$  ( $[\text{M}+\text{H}]^+$ ): Calcd.: 451.2040, Found: 451.2032. **HPLC**: Daicel Chiral AD-H, Hexane/ $i$ PrOH = 80/20, 0.7 mL/min, 214 nm, retention times  $t_R$  (*exo* diastereoisomer, minor) = 8.8 min,  $t_R$  (*endo* diastereoisomer, minor) = 11.6 min,  $t_R$  (*endo* diastereoisomer, major) = 12.6 min,  $t_R$  (*exo* diastereoisomer, major) = 13.7 min. 84% ee (*exo*), 86% ee (*endo*), dr (*exo:endo*) = 5:1.  $[\alpha]_{\text{D}}^{20} = 96.4$  ( $c = 1.06$ ,  $\text{CHCl}_3$ ).

**(8*S*,13*R*,14*R*)-Adamantan-1-yl 2-fluoro-17-oxo-7,8,12,13,14,15,16,17-octahydro-6*H*-cyclopenta[*a*]phenanthrene-13-carboxylate (3k)**

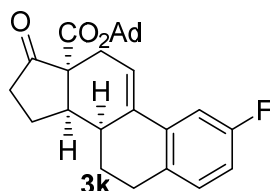

47 mg, viscous liquid, 54% yield, 6:1 dr, 87%, 94% ee.  $^1\text{H NMR}$  (400 MHz, Chloroform-*d*)  $\delta$  7.32 – 7.21 (m, 1H), 7.04 (dd,  $J = 8.7, 6.1$  Hz, 1H), 6.82 (td,  $J = 8.3, 2.8$  Hz, 1H), 6.26 (dq,  $J = 11.2, 3.3$  Hz, 1H), 3.00 (dt,  $J = 12.2, 6.1$  Hz, 1H), 2.94 – 2.71 (m, 3H), 2.60 – 2.23 (m, 4H), 2.22 – 1.84 (m, 11H), 1.75 – 1.41 (m, 8H).  $^{13}\text{C NMR}$  (126 MHz, Chloroform-*d*)  $\delta$  213.95, 170.22, 161.69 (d,  $J = 242.5$  Hz), 135.74 (d,  $J = 7.2$  Hz), 133.41 (d,  $J = 2.5$  Hz), 132.45 (d,  $J = 2.7$  Hz), 130.59 (d,  $J = 8.0$  Hz), 118.06, 114.14 (d,  $J = 21.5$  Hz), 109.51 (d,  $J = 22.1$  Hz), 81.98, 59.78, 44.68, 41.30, 37.05, 36.26, 34.51, 30.98, 29.54, 26.64, 25.47, 21.49.  $^{19}\text{F NMR}$  (376 MHz, Chloroform-*d*)  $\delta$  -117.06 (q,  $J = 8.3$  Hz, 1F) **IR** (KBr):  $\nu_{\text{max}}$  2913, 2857, 1751, 1720, 1490, 1263, 1229, 1203, 1052, 866  $\text{cm}^{-1}$ . **MS** (EI): (relative intensity):  $m/z$  434 ( $\text{M}^+$ ), 135 (100), 93 (9.12), 79 (9.28). **HRMS** (ESI) For  $[\text{C}_{28}\text{H}_{32}\text{FO}_3]^+$  ( $[\text{M}+\text{H}]^+$ ): Calcd.: 435.2335, Found: 435.2327. **HPLC**: Daicel Chiral IG, Hexane/ $i$ PrOH = 90/10, 0.7 mL/min, 214 nm, retention times  $t_R$  (*exo* diastereoisomer, minor) = 15.2 min,  $t_R$  (*endo* diastereoisomer, minor) = 19.1 min,  $t_R$  (*endo* diastereoisomer, major) = 22.6 min,  $t_R$  (*exo* diastereoisomer, major) = 29.5 min. 87% ee (*exo*), 94% ee (*endo*), dr (*exo:endo*) = 6:1.  $[\alpha]_{\text{D}}^{20} = 91.33$  ( $c = 1.05$ ,  $\text{CHCl}_3$ ).

**(3*aR*,10*aS*,10*bR*)-Adamantan-1-yl 3-oxo-1,2,3,3*a*,4,10,10*a*,10*b*-octahydro-**

### cyclopenta[a]fluorene-3a-carboxylate (**3l**)

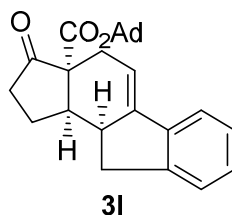

80 mg, viscous liquid, 99% yield, >99:1 dr, 59% ee.  $^1\text{H NMR}$  (400 MHz, Chloroform-*d*)  $\delta$  7.40 (q,  $J = 4.6$  Hz, 1H), 7.27 (d,  $J = 3.3$  Hz, 1H), 7.23 – 7.15 (m, 2H), 6.04 (dt,  $J = 5.6, 3.2$  Hz, 1H), 3.27 – 3.18 (m, 1H), 3.14 – 3.03 (m, 2H), 2.94 – 2.80 (m, 2H), 2.47 – 2.32 (m, 3H), 2.19 – 1.96 (m, 10H), 1.64 (d,  $J = 3.0$  Hz, 6H), 1.39 (qd,  $J = 12.1, 9.4$  Hz, 1H).  $^{13}\text{C NMR}$  (126 MHz, Chloroform-*d*)  $\delta$  214.67, 170.81, 144.63, 142.87, 140.28, 128.10, 126.83, 125.39, 120.40, 113.37, 81.98, 60.55, 43.86, 41.29, 39.49, 37.82, 36.26, 33.24, 30.98, 26.08, 21.29. **IR** (KBr):  $\nu_{\text{max}}$  2922, 2850, 1734, 1604, 1458, 1263, 736  $\text{cm}^{-1}$ . **MS** (EI): (relative intensity):  $m/z$  402 ( $\text{M}^+$ ), 238 (27.28), 224 (56.19), 191 (65.55), 181 (41.01), 167 (72.09), 160 (43.06), 152 (44.52), 111 (45.64), 97 (66.37), 83 (76.63), 69 (72.83), 57 (100), 43 (74.17). **HRMS** (ESI) For  $[\text{C}_{27}\text{H}_{31}\text{O}_3]^+$  ( $[\text{M}+\text{H}]^+$ ): Calcd.: 403.2273, Found: 403.2268. **HPLC**: Daicel Chiral PA2, Hexane/ $^i\text{PrOH}$  = 90/10, 0.7 mL/min, 214 nm, retention times  $t_R$  (*exo* diastereoisomer, minor) = 22.6 min,  $t_R$  (*exo* diastereoisomer, major) = 29.6 min, 59% ee (*exo*), dr (*exo:endo*) >99:1.  $[\alpha]_{\text{D}}^{20} = 113.37$  ( $c = 0.98, \text{CHCl}_3$ ).

### (3a*R*,3b*S*,12a*R*)-Adamantan-1-yl 1-oxo-1,2,3,3a,3b,4,5,6,12,12a-decahydrobenzo-[3,4]cyclohepta[1,2-*e*]indene-12a-carboxylate (**3m**)

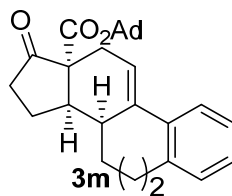

64 mg, viscous liquid, 74% yield, >99:1 dr, 88% ee.  $^1\text{H NMR}$  (400 MHz, Chloroform-*d*)  $\delta$  7.18 (h,  $J = 6.9, 6.2$  Hz, 2H), 7.12 – 7.03 (m, 2H), 5.88 (dt,  $J = 6.7, 3.1$  Hz, 1H), 2.94 (td,  $J = 8.9, 4.4$  Hz, 1H), 2.81 – 2.69 (m, 2H), 2.67 – 2.51 (m, 3H), 2.50 – 2.40 (m, 1H), 2.28 – 2.13 (m, 4H), 2.10 (d,  $J = 2.9$  Hz, 6H), 1.89 (ddt,  $J = 18.5, 13.7, 7.6$  Hz, 2H), 1.77 (tt,  $J = 12.7, 5.9$  Hz, 1H), 1.66 (s, 5H), 1.57 – 1.27 (m, 4H).  $^{13}\text{C NMR}$  (101 MHz, Chloroform-*d*)  $\delta$  216.19, 171.33, 146.42, 141.59,

137.88, 128.15, 127.77, 127.14, 126.89, 124.24, 82.11, 60.93, 49.27, 41.23, 38.87, 38.16, 36.20, 31.49, 30.95, 27.64, 26.35, 26.15, 21.86. **IR** (KBr):  $\nu_{\max}$  2911, 2850, 1742, 1720, 1236, 1199, 1054, 763  $\text{cm}^{-1}$ . **MS** (EI): (relative intensity):  $m/z$  430 ( $\text{M}^+$ ), 135 (100). **HRMS** (ESI) For  $[\text{C}_{29}\text{H}_{35}\text{O}_3]^+$  ( $[\text{M}+\text{H}]^+$ ): Calcd.: 431.2586, Found: 431.2578. **HPLC**: Daicel Chiral AD-H, Hexane/ $i$ PrOH = 99/1, 0.7 mL/min, 254 nm, retention times  $t_{\text{R}}$  (*exo* diastereoisomer, major) = 13.6 min,  $t_{\text{R}}$  (*exo* diastereoisomer, minor) = 15.1 min, 88% ee (*exo*), dr (*exo:endo*) > 99:1.  $[\alpha]_{\text{D}}^{20} = 3.26$  ( $c = 0.45$ ,  $\text{CHCl}_3$ ).

**(3a*R*,11b*S*,11c*R*)-Adamantan-1-yl 3-oxo-2,3,3a,4,6,7,11b,11c-octahydro-1*H*-cyclopenta[*c*]phenanthrene-3a-carboxylate (3n)**

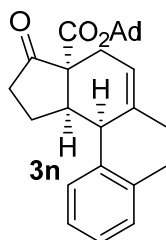

47 mg, viscous liquid, 56% yield, >99:1 dr, 99% ee.  **$^1\text{H}$  NMR** (400 MHz, Chloroform-*d*)  $\delta$  7.36 – 7.29 (m, 1H), 7.16 – 7.05 (m, 3H), 5.61 (h,  $J = 2.5$  Hz, 1H), 4.20 (s, 1H), 2.99 (dq,  $J = 10.3$ , 5.1 Hz, 1H), 2.67 (dddd,  $J = 18.7$ , 14.8, 11.3, 4.1 Hz, 2H), 2.47 (dt,  $J = 13.7$ , 5.2 Hz, 2H), 2.31 (ddd,  $J = 20.5$ , 10.5, 5.1 Hz, 2H), 2.23 – 2.12 (m, 9H), 2.03 (dtt,  $J = 34.6$ , 10.6, 6.2 Hz, 3H), 1.69 (d,  $J = 4.4$  Hz, 7H).  **$^{13}\text{C}$  NMR** (101 MHz, Chloroform-*d*)  $\delta$  212.23, 172.91, 140.64, 138.35, 135.90, 128.86, 128.15, 126.05, 125.77, 120.09, 82.88, 66.04, 43.17, 41.54, 41.21, 36.90, 36.17, 33.13, 30.96, 30.81, 28.57, 26.83. **IR** (KBr):  $\nu_{\max}$  2909, 2849, 1752, 1718, 1227, 1057, 744  $\text{cm}^{-1}$ . **MS** (EI): (relative intensity):  $m/z$  416 ( $\text{M}^+$ ), 135 (100). **HRMS** (ESI) For  $[\text{C}_{28}\text{H}_{36}\text{NO}_3]^+$  ( $[\text{M}+\text{NH}_4]^+$ ): Calcd.: 434.2695, Found: 434.2681. **HPLC**: Daicel Chiral AD-H, Hexane/ $i$ PrOH = 99/1, 0.7 mL/min, 254 nm, retention times  $t_{\text{R}}$  (*exo* diastereoisomer, minor) = 24.7 min,  $t_{\text{R}}$  (*exo* diastereoisomer, major) = 37.5 min. 99% ee (*exo*), dr (*exo:endo*) > 99:1.  $[\alpha]_{\text{D}}^{20} = -44.84$  ( $c = 1.05$ ,  $\text{CHCl}_3$ ).

**(8*S*,13*R*,14*R*)-Adamantan-1-yl 11-methyl-17-oxo-7,8,12,13,14,15,16,17-octahydro-6*H*-cyclopenta[*a*]phenanthrene-13-carboxylate (3o)**

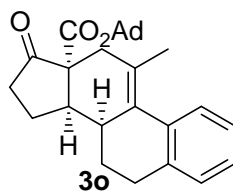

41 mg, viscous liquid, 48% yield, 14:1 dr, 74%, 54% ee.  $^1\text{H NMR}$  (400 MHz, Chloroform-*d*)  $\delta$  7.31 – 7.24 (m, 1H), 7.19 – 7.06 (m, 3H), 2.85 – 2.72 (m, 2H), 2.68 – 2.49 (m, 2H), 2.43 – 2.30 (m, 3H), 2.23 – 2.02 (m, 6H), 1.97 (dd,  $J = 13.4, 2.2$  Hz, 8H), 1.76 (dtd,  $J = 12.5, 10.6, 5.4$  Hz, 2H), 1.58 (d,  $J = 3.3$  Hz, 7H).  $^{13}\text{C NMR}$  (126 MHz, Chloroform-*d*)  $\delta$  214.04, 169.66, 139.35, 136.65, 130.41, 128.95, 128.68, 127.70, 126.22, 125.05, 81.86, 64.47, 41.23, 40.17, 37.98, 36.20, 35.95, 30.90, 30.17, 25.77, 25.40, 21.87. **IR** (KBr):  $\nu_{\text{max}}$  2912, 2853, 1745, 1721, 1456, 1234, 1055, 765, 737  $\text{cm}^{-1}$ . **MS** (ESI):  $m/z$  431 ( $[\text{M}+\text{H}]^+$ ). **HRMS** (ESI) For  $[\text{C}_{29}\text{H}_{35}\text{O}_3]^+$  ( $[\text{M}+\text{H}]^+$ ): Calcd.: 431.2581, Found: 431.2579. **HPLC**: Daicel Chiral AD-H, Hexane/ $^i$ PrOH = 99/1, 0.7 mL/min, 254 nm, retention times  $t_{\text{R}}$  (*exo* diastereoisomer, major) = 17.3 min.  $t_{\text{R}}$  (*endo* diastereoisomer, major) = 19.7 min,  $t_{\text{R}}$  (*endo* diastereoisomer, minor) = 22.5 min,  $t_{\text{R}}$  (*exo* diastereoisomer, minor) = 25.3 min, 74% ee (*exo*), 54% ee (*endo*), dr (*exo:endo*) 14:1.  $[\alpha]_{\text{D}}^{20} = 41.80$  ( $c = 0.67$ ,  $\text{CHCl}_3$ , 74% ee).

**(3a*R*,7a*R*)-tert-Butyl-5,6-dimethyl-3-oxo-2,3,3a,4,7,7a-hexahydro-1H-indene-3a-carboxylate (3p)**

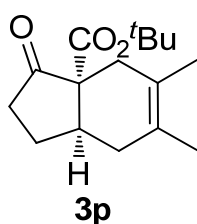

50 mg, colourless liquid, 95%, 92% ee.  $^1\text{H NMR}$  (400 MHz, Chloroform-*d*)  $\delta$  2.86 – 2.75 (m, 1H), 2.46 – 2.32 (m, 3H), 2.31 – 2.17 (m, 1H), 2.07 – 1.95 (m, 2H), 1.79 (d,  $J = 17.8$  Hz, 1H), 1.69 – 1.57 (m, 7H), 1.42 (s, 9H).  $^{13}\text{C NMR}$  (101 MHz, Chloroform-*d*)  $\delta$  214.40, 171.05, 123.44, 122.38, 81.50, 60.48, 38.57, 36.33, 32.56, 30.31, 28.05, 25.90, 19.28, 19.00. **IR** (neat): 2917, 1721, 1451, 1368, 1244, 1147, 1036, 847, 522  $\text{cm}^{-1}$ . **HRMS** (ESI) For  $[\text{C}_{16}\text{H}_{24}\text{O}_3\text{N}]^+$  ( $[\text{M}+\text{NH}_4]^+$ ): Calcd. 282.2069, Found: 282.2065. **HPLC**: Daicel Chiral ADRH, Acetone/Water = 50/50, 0.5 mL/min, 214 nm,  $t_{\text{R}}$  (major) = 11.7 min,  $t_{\text{R}}$  (minor) = 12.8 min (92% ee).  $[\alpha]_{\text{D}}^{20} = 100.04$  ( $c = 0.763$ ,



CHCl<sub>3</sub>).

**(3a*R*,7a*R*)-Adamantan-1-yl-5,6-dimethyl-3-oxo-2,3,3a,4,7,7a-hexahydro-1H-inden e-3a-carboxylate (3q)**

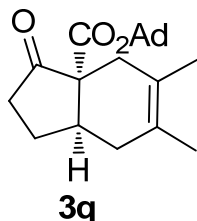

67 mg, colourless liquid, 98%, 96% ee. <sup>1</sup>H NMR (400 MHz, Chloroform-*d*) δ 2.79 (dtd, *J* = 10.0, 6.8, 3.5 Hz, 1H), 2.44 – 2.30 (m, 3H), 2.30 – 2.16 (m, 1H), 2.16 – 2.09 (m, 3H), 2.09 – 1.95 (m, 9H), 1.83 – 1.67 (m, 2H), 1.63 (s, 11H). <sup>13</sup>C NMR (101 MHz, Chloroform-*d*) δ 214.41, 170.77, 123.39, 122.41, 81.52, 60.55, 41.24, 38.63, 36.31, 36.23, 32.59, 30.91, 30.32, 25.89, 19.26, 18.98. IR (neat): 2911, 1751, 1457, 1369, 1238, 1155, 1057, 804, 519 cm<sup>-1</sup>. HRMS (ESI) For [C<sub>22</sub>H<sub>30</sub>O<sub>3</sub>Na]<sup>+</sup> ([M+Na]<sup>+</sup>): Calcd. 365.2093, Found: 365.2082. HPLC: Daicel Chiral ADRH, Acetone/Water = 60/40, 0.7 mL/min, 214 nm, *t<sub>R</sub>* (major) = 33.3 min, *t<sub>R</sub>* (minor) = 51.0 min (96% ee). [α]<sub>D</sub><sup>20</sup> = 75.13 (c = 0.948, CHCl<sub>3</sub>).

**(3a*R*,7a*R*)-Adamantan-1-yl-5,6-dibenzyl-3-oxo-2,3,3a,4,7,7a-hexahydro-1H-inden e-3a-carboxylate (3r)**

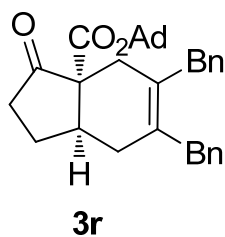

22 mg, colourless liquid, 22%, 72% ee. <sup>1</sup>H NMR (400 MHz, Chloroform-*d*) δ 7.32 – 7.23 (m, 4H), 7.17 (dtd, *J* = 18.2, 11.1, 4.3 Hz, 6H), 3.63 (dd, *J* = 15.2, 6.4 Hz, 2H), 3.48 (t, *J* = 13.9 Hz, 2H), 2.77 (dtd, *J* = 10.2, 6.9, 3.5 Hz, 1H), 2.53 (d, *J* = 17.3 Hz, 1H), 2.36 – 2.20 (m, 3H), 2.14 (s, 3H), 2.07 – 1.95 (m, 8H), 1.88 (d, *J* = 18.2 Hz, 1H), 1.70 – 1.52 (m, 7H). <sup>13</sup>C NMR (101 MHz, Chloroform-*d*) δ 214.22, 170.46, 139.93, 139.80, 128.95, 128.71, 128.57, 128.54, 128.43, 126.18, 81.71, 60.57, 41.18, 39.35, 38.97, 38.71, 36.53, 36.24, 30.95, 30.88, 29.85, 29.06, 25.98. IR (neat): 2912, 2851, 1746, 1717, 1453, 1053, 1015, 698 cm<sup>-1</sup>. HRMS (ESI) For [C<sub>32</sub>H<sub>38</sub>O<sub>3</sub>Na]<sup>+</sup> ([M+Na]<sup>+</sup>): Calcd. 517.2719, Found: 517.2709. HPLC: Daicel Chiral AD-H, Hexane/*i*PrOH = 96/4, 0.7

mL/min, 214 nm,  $t_R$  (major) = 18.8 min,  $t_R$  (minor) = 15.4 min (72% ee).  $[\alpha]_D^{20} = 29.77$  ( $c = 0.55$ ,  $\text{CHCl}_3$ , 72% ee).

**(8*S*,13*R*,14*R*)-Methyl 17-oxo-7,8,12,13,14,15,16,17-octahydro-6*H*-cyclopenta[*a*]phenanthrene-13-carboxylate (3s)**

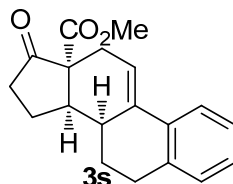

61 mg, viscous liquid, 98% yield, 5:1 dr, 11%, 39% ee.  $^1\text{H NMR}$  (400 MHz, Chloroform-*d*)  $\delta$  7.65 – 7.47 (m, 1H), 7.20 – 7.03 (m, 3H), 6.30 (dq,  $J = 20.5, 3.5, 3.0$  Hz, 1H), 3.73 (d,  $J = 15.9$  Hz, 3H), 3.17 – 2.69 (m, 4H), 2.67 – 2.20 (m, 4H), 2.18 – 2.03 (m, 1H), 2.02 – 1.83 (m, 1H), 1.70 – 1.53 (m, 2H).  $^{13}\text{C NMR}$  (101 MHz, Chloroform-*d*)  $\delta$  213.40, 171.81, 136.76, 133.88, 133.65, 129.38, 127.19, 126.27, 123.29, 115.94, 59.20, 52.92, 44.15, 36.83, 34.34, 30.17, 26.63, 25.42, 21.29. **IR** (KBr):  $\nu_{\text{max}}$  2952, 2912, 2834, 1749, 1728, 1605, 1498, 1234, 1166, 1036, 803  $\text{cm}^{-1}$ . **MS** (EI): (relative intensity):  $m/z$  326 ( $\text{M}^+$ ), 267 (100), 238 (29.61), 210 (57.69), 171 (31.63), 165 (37.66). **HRMS** (ESI) For  $[\text{C}_{20}\text{H}_{23}\text{O}_4]^+$  ( $[\text{M}+\text{H}]^+$ ): Calcd.: 327.1591, Found: 327.1587. **HPLC**: Daicel Chiral IG, Hexane/ $i$ PrOH = 90/10, 0.7 mL/min, 214 nm, retention times  $t_R$  (*endo* diastereoisomer, major) = 20.9 min,  $t_R$  (*endo* diastereoisomer, minor) = 22.8 min,  $t_R$  (*exo* diastereoisomer, minor) = 23.8 min,  $t_R$  (*exo* diastereoisomer, major) = 26.2 min. 11% ee (*exo*), 39% ee (*endo*), dr (*exo:endo*) = 5:1.  $[\alpha]_D^{20} = 29.58$  ( $c = 1.01$ ,  $\text{CHCl}_3$ ).

**(8*S*,13*R*,14*R*)-Methyl 3-methoxy-17-oxo-7,8,12,13,14,15,16,17-octahydro-6*H*-cyclopenta[*a*]phenanthrene-13-carboxylate (3t)**

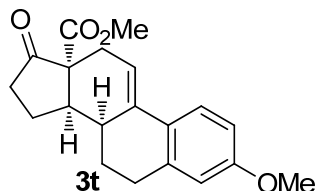

64 mg, viscous liquid, 98% yield, 6:1 dr, 13%, 24% ee.  $^1\text{H NMR}$  (400 MHz, Chloroform-*d*)  $\delta$  7.49 (dd,  $J = 39.4, 8.8$  Hz, 1H), 6.73 (dd,  $J = 8.7, 2.9$  Hz, 1H), 6.61 (d,  $J = 2.8$  Hz, 1H), 6.16 (q,  $J = 3.7$  Hz, 1H), 3.84 – 3.67 (m, 6H), 3.05 (dt,  $J = 12.2, 6.1$  Hz, 1H), 2.99 – 2.76 (m, 3H), 2.54 (dd,

$J = 19.1, 8.8$  Hz, 2H), 2.46 – 2.24 (m, 2H), 2.12 – 1.87 (m, 2H), 1.70 – 1.55 (m, 2H).  $^{13}\text{C NMR}$  (126 MHz, Chloroform- $d$ )  $\delta$  213.43, 171.85, 158.76, 138.19, 133.43, 126.69, 124.72, 113.67, 113.38, 112.92, 59.25, 55.38, 52.89, 44.12, 36.83, 34.33, 30.47, 26.71, 25.31, 21.27. **IR** (KBr):  $\nu_{\text{max}}$  2952, 2912, 2834, 1749, 1728, 1605, 1498, 1234, 1166, 1036, 803  $\text{cm}^{-1}$ . **MS** (EI): (relative intensity):  $m/z$  326 ( $\text{M}^+$ ), 267 (100), 238 (29.61), 210 (57.69), 171 (31.63), 165 (37.66). **HRMS** (ESI) For  $[\text{C}_{20}\text{H}_{23}\text{O}_4]^+$  ( $[\text{M}+\text{H}]^+$ ): Calcd.: 327.1591, Found: 327.1587. **HPLC**: Daicel Chiral IE3, Hexane/ $i$ PrOH = 85/15, 0.7 mL/min, 214 nm, retention times  $t_{\text{R}}$  (*endo* diastereoisomer, minor) = 29.5 min,  $t_{\text{R}}$  (*exo* diastereoisomer, minor) = 31.3 min,  $t_{\text{R}}$  (*exo* diastereoisomer, major) = 33.0 min,  $t_{\text{R}}$  (*endo* diastereoisomer, major) = 35.1 min. 13% ee (*exo*), 24% ee (*endo*), dr (*exo:endo*) = 6:1.  $[\alpha]_{\text{D}}^{20} = 29.58$  ( $c = 0.90$ ,  $\text{CHCl}_3$ ).

**(8*S*,13*R*,14*R*)-*tert*-Butyl 17-oxo-7,8,12,13,14,15,16,17-octahydro-6*H*-cyclopenta[*a*]phenanthrene-13-carboxylate (3u)**

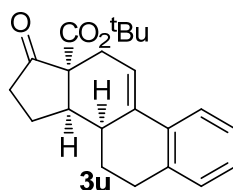

65 mg, viscous liquid, 96% yield, 14:1 dr, 89%, 88% ee.  $^1\text{H NMR}$  (400 MHz, Chloroform- $d$ )  $\delta$  7.69 – 7.57 (m, 1H), 7.12 (tdd,  $J = 14.1, 9.4, 6.0$  Hz, 3H), 6.33 (q,  $J = 3.7$  Hz, 1H), 3.01 (dt,  $J = 12.2, 6.1$  Hz, 1H), 2.88 (dt,  $J = 10.3, 4.8$  Hz, 3H), 2.61 (dd,  $J = 17.8, 10.1$  Hz, 1H), 2.54 – 2.34 (m, 2H), 2.29 (dt,  $J = 19.2, 3.5$  Hz, 1H), 2.10 – 1.92 (m, 2H), 1.69 – 1.52 (m, 2H), 1.44 (d,  $J = 5.5$  Hz, 9H).  $^{13}\text{C NMR}$  (126 MHz, Chloroform- $d$ )  $\delta$  214.16, 170.58, 136.83, 133.96, 133.91, 129.28, 127.07, 126.29, 123.32, 116.67, 81.82, 59.83, 44.65, 37.04, 34.74, 30.21, 28.10, 26.63, 25.46, 21.51. **IR** (KBr):  $\nu_{\text{max}}$  2973, 2935, 1746, 1705, 1367, 1326, 1269, 1153, 850, 743  $\text{cm}^{-1}$ . **MS** (EI): (relative intensity):  $m/z$  338 ( $\text{M}^+$ ), 282 (51.73), 237 (100), 218 (26.65), 193 (30.19), 179 (47.02), 165 (42.69), 141 (39.55), 128 (30.38), 115 (20.61), 109 (13.52), 57 (58.01). **HRMS** (ESI) For  $[\text{C}_{22}\text{H}_{30}\text{NO}_3]^+$  ( $[\text{M}+\text{NH}_4]^+$ ): Calcd.: 356.2226, Found: 356.2215. **HPLC**: Daicel Chiral AD-H, Hexane/ $i$ PrOH = 98/2, 0.7 mL/min, 254 nm, retention times  $t_{\text{R}}$  (*exo* diastereoisomer, minor) = 11.9 min,  $t_{\text{R}}$  (*endo* diastereoisomer, minor) = 15.7 min,  $t_{\text{R}}$  (*endo* diastereoisomer, major) = 16.6 min,  $t_{\text{R}}$  (*exo* diastereoisomer, major) = 18.0 min. 89% ee (*exo*), 88% ee (*endo*), dr (*exo:endo*) = 14:1.  $[\alpha]_{\text{D}}^{20} = 130.81$  ( $c = 0.99$ ,  $\text{CHCl}_3$ ).

**(8*S*,13*R*,14*R*)-*tert*-Butyl 3-methoxy-17-oxo-7,8,12,13,14,15,16,17-octahydro-6*H*-cyclopenta[*a*]phenanthrene-13-carboxylate (3v)**

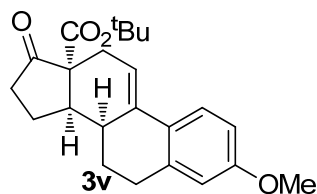

61 mg, viscous liquid, 83% yield, >99:1 dr, 89% ee. <sup>1</sup>H NMR (400 MHz, Chloroform-*d*) δ 7.53 (d, *J* = 8.8 Hz, 1H), 6.72 (dd, *J* = 8.8, 2.7 Hz, 1H), 6.61 (d, *J* = 2.8 Hz, 1H), 6.15 (q, *J* = 3.6 Hz, 1H), 3.77 (s, 3H), 2.99 (dt, *J* = 12.2, 6.1 Hz, 1H), 2.93 – 2.74 (m, 3H), 2.62 – 2.18 (m, 4H), 2.09 – 1.88 (m, 2H), 1.60 (ddt, *J* = 25.9, 12.4, 6.9 Hz, 2H), 1.44 (s, 9H). <sup>13</sup>C NMR (101 MHz, Chloroform-*d*) δ 214.04, 170.47, 158.54, 138.07, 133.25, 126.75, 124.60, 114.13, 113.18, 112.74, 81.58, 59.69, 55.22, 44.41, 36.86, 34.50, 30.36, 27.97, 26.59, 25.11, 21.34. IR (KBr): ν<sub>max</sub> 2973, 2910, 2834, 1749, 1724, 1604, 1499, 1231, 1151, 846 cm<sup>-1</sup>. MS (EI): (relative intensity): *m/z* 368 (M<sup>+</sup>), 267 (100), 211 (32.19), 171 (23.27), 165 (33.53), 115 (19.51), 57 (26.18), 44 (31.6). HRMS (ESI) For [C<sub>23</sub>H<sub>32</sub>NO<sub>4</sub>]<sup>+</sup> ([M+NH<sub>4</sub>]<sup>+</sup>): Calcd.: 386.2331, Found: 386.2321. HPLC: Daicel Chiral IF3, Hexane/<sup>i</sup>PrOH = 90/10, 0.7 mL/min, 214 nm, retention times *t<sub>R</sub>* (*endo* diastereoisomer, minor) = 9.2 min, *t<sub>R</sub>* (*endo* diastereoisomer, minor) = 10.2 min, *t<sub>R</sub>* (*exo* diastereoisomer, minor) = 10.8 min, *t<sub>R</sub>* (*exo* diastereoisomer, major) = 12.9 min. 89% ee (*exo*), dr (*exo:endo*) > 99:1. [*α*]<sub>D</sub><sup>20</sup> = 147.27 (*c* = 0.94, CHCl<sub>3</sub>).

**(6*aR*,10*aR*,10*bS*)-*tert*-Butyl 2-methoxy-7-oxo-6,6*a*,7,8,9,10,10*a*,10*b*,11,12-decahydrochrysen-6*a*-carboxylate (3w)**

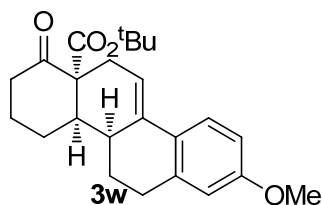

65 mg, viscous liquid, 85% yield, >99:1 dr, 90% ee. <sup>1</sup>H NMR (400 MHz, Chloroform-*d*) δ 7.58 (d, *J* = 8.8 Hz, 1H), 6.72 (dd, *J* = 8.8, 2.7 Hz, 1H), 6.59 (d, *J* = 2.8 Hz, 1H), 6.18 (d, *J* = 5.5 Hz, 1H), 3.78 (s, 3H), 3.00 – 2.87 (m, 1H), 2.87 – 2.76 (m, 2H), 2.72 – 2.56 (m, 2H), 2.55 – 2.43 (m, 1H), 2.43 – 2.32 (m, 2H), 2.10 (s, 1H), 1.89 – 1.62 (m, 5H), 1.44 (s, 9H). <sup>13</sup>C NMR (126 MHz, Chloroform-*d*) δ 210.01, 170.82, 158.57, 138.15, 132.38, 126.68, 124.71, 113.34, 112.88, 81.38,

62.48, 55.37, 43.07, 37.33, 36.69, 31.19, 29.85, 28.08, 27.97, 27.60, 24.66, 21.07. **IR** (KBr):  $\nu_{\max}$  2931, 2831, 1732, 1703, 1604, 1497, 1456, 1366, 1298, 1234, 1164, 1139, 852, 804  $\text{cm}^{-1}$ . **MS** (EI): (relative intensity):  $m/z$  382 ( $\text{M}^+$ ), 326 (22.72), 281 (100), 211 (16.84), 123 (17.79), 165 (33.53), 115 (19.51), 57 (26.18), 44 (31.6). **HRMS** (EI) For  $[\text{C}_{24}\text{H}_{30}\text{O}_4]^+$  ( $\text{M}^+$ ): Calcd.: 382.2144, Found: 382.2151. **HPLC**: Daicel Chiral AD-H, Hexane/ $i$ PrOH = 90/10, 0.7 mL/min, 254 nm, retention times  $t_R$  (*exo* diastereoisomer, minor) = 9.1 min,  $t_R$  (*exo* diastereoisomer, major) = 14.0 min. 90% ee (*exo*), dr (*exo:endo*) > 99:1.  $[\alpha]_{\text{D}}^{20} = 71.16$  ( $c = 1.01$ ,  $\text{CHCl}_3$ ).

***tert*-Butyl (3*aR*,3*bS*,11*aR*)-1-oxo-3,3*a*,3*b*,4,5,11-hexahydrophenanthro[1,2-*c*]furan-11*a*(1*H*)-carboxylate (3*x*)**

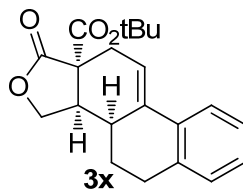

72 mg, viscous liquid, 97% yield, >99:1 dr, 87% ee.  **$^1\text{H}$  NMR** (400 MHz, Chloroform-*d*)  $\delta$  7.49 (d,  $J = 8.7$  Hz, 1H), 6.75 (dd,  $J = 8.7, 2.7$  Hz, 1H), 6.62 (d,  $J = 2.7$  Hz, 1H), 6.26 (s, 1H), 4.35 (t,  $J = 8.9$  Hz, 1H), 3.91 (dd,  $J = 9.0, 7.8$  Hz, 1H), 3.79 (s, 3H), 3.34 (ddd,  $J = 9.0, 7.8, 5.1$  Hz, 1H), 2.83 – 2.71 (m, 4H), 2.62 (d,  $J = 13.2$  Hz, 1H), 1.98 (dd,  $J = 12.7, 4.3$  Hz, 1H), 1.49 (s, 9H), 1.38 (ddd,  $J = 12.7, 8.5, 4.2$  Hz, 1H).  **$^{13}\text{C}$  NMR** (126 MHz, Chloroform-*d*)  $\delta$  176.98, 169.32, 159.01, 138.57, 135.66, 126.66, 124.89, 116.39, 113.26, 112.97, 83.02, 68.82, 55.84, 55.41, 44.30, 35.75, 30.13, 28.22, 27.99, 25.58. **IR** (neat):  $\nu_{\max}$  2963, 2921, 2844, 1765, 1735, 1632, 1598, 1567, 1486, 1368, 1247, 1147, 1098, 1027, 895, 849, 809, 768, 711, 624, 547, 460  $\text{cm}^{-1}$ . **MS** (ESI):  $m/z$  393.1 ( $[\text{M}+\text{Na}]^+$ ). **HRMS** (ESI) For  $[\text{C}_{22}\text{H}_{27}\text{O}_5]^+$  ( $[\text{M}+\text{H}]^+$ ): Calcd.: 371.1858, Found: 371.1854. **HPLC**: Daicel Chiral AD-H, Hexane/ $i$ PrOH = 97/3, 0.7 mL/min, 254 nm, retention times  $t_R$  (*exo* diastereoisomer, major) = 32.2 min,  $t_R$  (*exo* diastereoisomer, minor) = 33.7 min. 87% ee (*exo*), dr (*exo:endo*) > 99:1.  $[\alpha]_{\text{D}}^{20} = 116.34$  ( $c = 0.92$ ,  $\text{CHCl}_3$ ).

**(2R,10aS)-tert-Butyl 2-benzoyl-7-methoxy-1,2,3,9,10,10a-hexahydrophenanthrene-2-carboxylate (3y)**

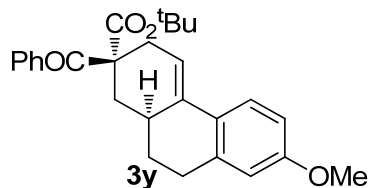

42 mg, viscous liquid, 97% yield, 2:1 dr, 67%, 72% ee. **Mixture of two isomers:**  $^1\text{H}$  NMR (400 MHz, Chloroform-*d*)  $\delta$  7.92 (dd,  $J = 29.2, 7.8$  Hz, 2H), 7.61 – 7.48 (m, 2H), 7.43 (td,  $J = 7.6, 3.9$  Hz, 2H), 6.71 (ddd,  $J = 16.9, 7.9, 3.7$  Hz, 1H), 6.58 (dd,  $J = 26.8, 2.8$  Hz, 1H), 6.20 – 6.11 (m, 1H), 3.78 (d,  $J = 10.5$  Hz, 3H), 3.11 (ddd,  $J = 22.2, 18.5, 5.4$  Hz, 1H), 2.98 – 2.15 (m, 5H), 1.96 (ddt,  $J = 34.0, 25.0, 13.5$  Hz, 2H), 1.60 – 1.31 (m, 5H), 1.26 (s, 5H).  $^{13}\text{C}$  NMR (101 MHz, Chloroform-*d*)  $\delta$  197.98, 195.96, 173.12, 171.93, 158.59, 158.53, 137.88, 137.65, 136.24, 135.37, 135.22, 134.33, 132.79, 132.62, 128.84, 128.72, 128.52, 128.45, 126.83, 126.79, 125.07, 125.05, 115.23, 114.84, 113.26, 113.19, 112.80, 112.71, 82.22, 81.83, 57.52, 57.10, 55.33, 55.30, 36.85, 36.75, 32.99, 32.91, 32.62, 30.84, 30.24, 30.00, 27.75, 27.69. **IR** (KBr):  $\nu_{\text{max}}$  2930, 2836, 1728, 1682, 1607, 1499, 1449, 1369, 1253, 1152, 1038, 843, 811, 700  $\text{cm}^{-1}$ . **MS** (EI): (relative intensity):  $m/z$  418 ( $\text{M}^+$ ), 318 (18.28), 239 (37.1), 105 (100), 77 (51.27), 57 (26.66). **HRMS** (ESI) For  $[\text{C}_{27}\text{H}_{31}\text{NO}_4]^+$  ( $[\text{M}+\text{H}]^+$ ): Calc.: 419.2217, Found: 419.2214. **HPLC**: Daicel Chiral AD-H, Hexane/*i*PrOH = 80/20, 0.7 mL/min, 214 nm, retention times  $t_{\text{R}}$  (*exo* diastereoisomer, minor) = 7.4 min,  $t_{\text{R}}$  (*endo* diastereoisomer, major) = 8.5 min,  $t_{\text{R}}$  (*exo* diastereoisomer, major) = 9.5 min,  $t_{\text{R}}$  (*endo* diastereoisomer, minor) = 11.3 min. 67% ee (*exo*), 72% ee (*endo*), dr (*exo:endo*) = 2:1.  $[\alpha]_{\text{D}}^{20} = 6.73$  ( $c = 1.08, \text{CHCl}_3$ ).

**(3S,5S,7S)-Adamantan-1-yl (2R,10aS)-2-benzoyl-7-methoxy-1,2,3,9,10,10a-hexahydrophenanthrene-2-carboxylate (3z)**

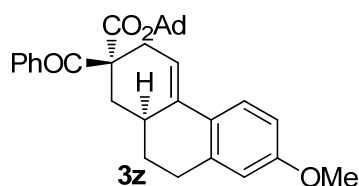

93 mg, viscous liquid, 94% yield, 1.6:1 dr, 68%, 78% ee. **Mixture of two isomers:**  
 $^1\text{H NMR}$  (400 MHz, Chloroform-*d*)  $\delta$  7.92 (dd,  $J = 31.4, 7.7$  Hz, 2H), 7.54 (dt,  $J = 13.5, 9.0$  Hz, 2H), 7.43 (q,  $J = 7.0$  Hz, 2H), 6.78 – 6.67 (m, 1H), 6.58 (dd,  $J = 26.7, 2.7$  Hz, 1H), 6.24 – 6.06 (m, 1H), 3.77 (d,  $J = 10.5$  Hz, 3H), 3.10 (td,  $J = 15.7, 13.3, 5.0$  Hz, 1H), 2.82 (dddd,  $J = 62.4, 28.1, 16.6, 5.0$  Hz, 2H), 2.60 (ddt,  $J = 17.0, 10.1, 5.9$  Hz, 1H), 2.53 – 2.26 (m, 2H), 2.16 – 1.84 (m, 11H), 1.58 (d,  $J = 23.4$  Hz, 7H).  $^{13}\text{C NMR}$  (101 MHz, Chloroform-*d*)  $\delta$  197.94, 196.04, 172.82, 171.65, 158.55, 158.50, 137.85, 137.63, 136.19, 135.41, 135.19, 134.30, 132.77, 132.56, 128.85, 128.76, 128.50, 128.42, 126.84, 126.79, 125.07, 125.04, 115.28, 114.86, 113.23, 113.17, 112.77, 112.69, 82.23, 81.84, 57.52, 57.16, 55.31, 55.29, 40.95, 40.87, 36.86, 36.71, 36.09, 36.06, 33.01, 32.96, 32.61, 30.83, 30.76, 30.25, 30.00. **IR** (KBr):  $\nu_{\text{max}}$  2913, 2853, 1725, 1683, 1606, 1498, 1449, 1235, 1052, 965, 736, 701  $\text{cm}^{-1}$ . **MS** (EI): (relative intensity):  $m/z$  496 ( $\text{M}^+$ ), 317 (14.59), 239 (38.59) 135 (100), 105 (36.94). **HRMS** (ESI) For  $[\text{C}_{33}\text{H}_{37}\text{NO}_4]^+$  ( $[\text{M}+\text{H}]^+$ ): Calcl.: 497.2686, Found: 497.2685. **HPLC**: Daicel Chiral AD-H, Hexane/ $^i$ PrOH = 90/10, 0.7 mL/min, 254 nm, retention times  $t_{\text{R}}$  (*exo* diastereoisomer, minor) = 10.4 min,  $t_{\text{R}}$  (*endo* diastereoisomer, minor) = 15.8 min,  $t_{\text{R}}$  (*endo* diastereoisomer, major) = 17.0 min,  $t_{\text{R}}$  (*exo* diastereoisomer, major) = 20.0 min. 67% ee (*exo*), 72% ee (*endo*), dr: (*exo:endo*) = 2:1.  $[\alpha]_{\text{D}}^{20} = 31.11$  ( $c = 0.90, \text{CHCl}_3$ ).

#### Gram scale and transformation of products:

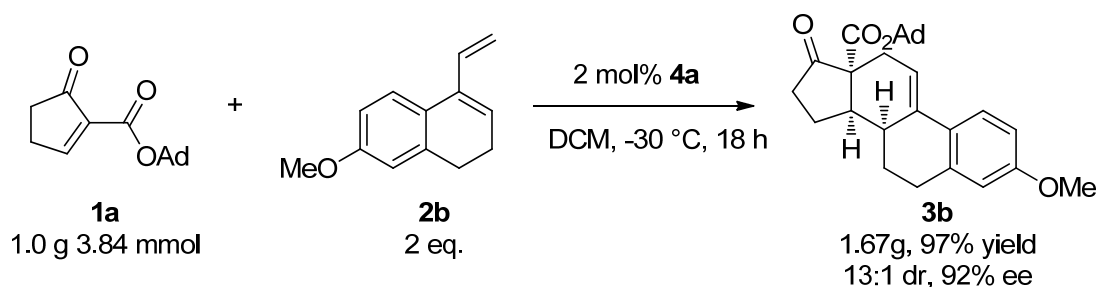

The unsaturated  $\beta$ -keto ester **1a** (1.0 g, 3.8 mmol) and **4a** (60 mg, 2 mol%) were dissolved in dry DCM (38 mL, 0.1 M) under Ar atmosphere at room temperature. After stirring for 30 min, diene **2b** (2 equiv.) was added at  $-30\text{ }^\circ\text{C}$ . After the completion of the reaction (18 h), the reaction mixture

was concentrated, and the product was purified by flash column chromatography to afford the desired product (1.67 g, 97% yield, 13:1 dr, 92% ee) as viscous liquid.

**(8*S*,13*R*,14*R*,17*R*)-Adamantan-1-yl 17-hydroxy-3-methoxy-7,8,12,13,14,15,16,17-octahydro-6*H*-cyclopenta[*a*]phenanthrene-13-carboxylate (**7**)<sup>28</sup>**

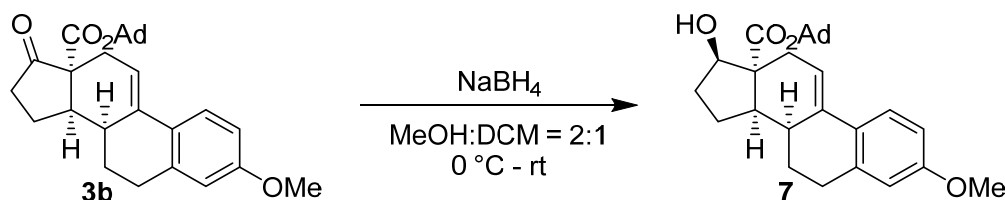

NaBH<sub>4</sub> (12.2 mg, 0.32 mmol, 2 equiv.) was suspended in 2 mL dry MeOH, and the solution was cooled to 0 °C. Then **3b** (72 mg, 0.16 mmol, in 1 mL DCM) was added. The reaction mixture was allowed to warm to room temperature, stirred overnight. H<sub>2</sub>O (5 mL) was added to quench the reaction, and MeOH was evaporated in vacuo. The mixture was neutralized by 1 M AcOH, and extracted by DCM (5 mL × 3). The combined organic layer was dried over MgSO<sub>4</sub> and concentrated in vacuo. the product was purified by flash column chromatography to afford a viscous liquid (68 mg, 94%). <sup>1</sup>H NMR (400 MHz, Chloroform-*d*) δ 7.58 (d, *J* = 8.8 Hz, 1H), 6.72 (dd, *J* = 8.8, 2.8 Hz, 1H), 6.59 (d, *J* = 2.8 Hz, 1H), 6.21 (q, *J* = 3.7 Hz, 1H), 4.40 (t, *J* = 8.3 Hz, 1H), 3.78 (s, 3H), 2.93 – 2.73 (m, 2H), 2.67 (ddt, *J* = 13.0, 6.0, 3.1 Hz, 1H), 2.54 – 2.39 (m, 3H), 2.19 – 2.11 (m, 4H), 2.08 (d, *J* = 3.0 Hz, 7H), 1.87 – 1.75 (m, 1H), 1.69 – 1.55 (m, 8H), 1.48 (dddt, *J* = 15.9, 12.9, 7.9, 3.8 Hz, 2H). <sup>13</sup>C NMR (101 MHz, Chloroform-*d*) δ 175.70, 158.27, 138.08, 132.30, 127.35, 124.58, 114.90, 113.26, 112.67, 80.98, 78.43, 55.27, 53.68, 43.08, 41.39, 36.19, 35.29, 30.86, 30.78, 28.92, 27.29, 24.54, 22.33. IR (KBr): ν<sub>max</sub> 3482, 2910, 2852, 1708, 1607, 1497, 1233, 1054, 803 cm<sup>-1</sup>. MS (EI): (relative intensity): *m/z* 448 (M<sup>+</sup>), 313 (70.0), 135 (100). HRMS (ESI) For [C<sub>29</sub>H<sub>37</sub>O<sub>4</sub>]<sup>+</sup> ([M+H]<sup>+</sup>): Calcd.: 449.2692, Found: 449.2681. [α]<sub>D</sub><sup>20</sup> = 32.52 (*c* = 1.00, CHCl<sub>3</sub>).

**(8*S*,13*R*,14*R*,17*R*)-Adamantan-1-yl 17-((4-bromobenzoyl)oxy)-3-methoxy-7,8,12,13,14,15,16,17-octahydro-6*H*-cyclopenta[*a*]phenanthrene-13-carboxylate (**8**)<sup>29</sup>**



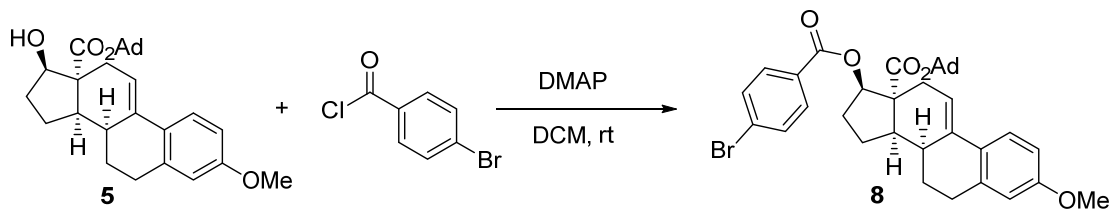

To a solution of **4-6** (55 mg, 0.12 mmol), DMAP (1.5 mg, 10% mol), and pyridine (20  $\mu$ L, 0.24 mmol, 2 equiv.) in 2 mL DCM, 4-bromobenzoyl chloride (40.4 mg, 0.18 mmol, 1.5 equiv.) was added at 0 °C. the reaction mixture was allowed to warm to room temperature and stirred overnight. The reaction was quenched by H<sub>2</sub>O and extracted by DCM (5 mL  $\times$  3). The combined organic layer was dried by MgSO<sub>4</sub>, concentrated in vacuo. The product was purified by flash column chromatography to afford a viscous liquid (69 mg, 89%). <sup>1</sup>H NMR (400 MHz, Chloroform-*d*)  $\delta$  8.01 – 7.80 (m, 2H), 7.59 (d, *J* = 8.5 Hz, 3H), 6.74 (dd, *J* = 8.8, 2.7 Hz, 1H), 6.60 (d, *J* = 2.7 Hz, 1H), 6.23 (dt, *J* = 5.2, 2.8 Hz, 1H), 5.65 (dd, *J* = 9.4, 6.3 Hz, 1H), 3.79 (s, 3H), 2.95 – 2.71 (m, 3H), 2.64 (dd, *J* = 12.2, 6.5 Hz, 1H), 2.59 – 2.50 (m, 1H), 2.42 (ddt, *J* = 25.9, 17.5, 6.1 Hz, 2H), 2.07 (dd, *J* = 24.2, 3.1 Hz, 9H), 1.93 – 1.72 (m, 3H), 1.69 – 1.47 (m, 8H). <sup>13</sup>C NMR (101 MHz, Chloroform-*d*)  $\delta$  173.65, 165.22, 158.37, 137.94, 131.84, 131.78, 131.25, 129.32, 128.11, 127.16, 124.66, 114.95, 113.26, 112.77, 80.96, 80.86, 55.30, 53.74, 44.73, 41.17, 36.21, 34.69, 30.84, 30.68, 28.38, 27.41, 24.68, 23.30. IR (KBr):  $\nu_{\max}$  2915, 2852, 1720, 1606, 1590, 1497, 1274, 1116, 1103, 1055, 1012, 757, 737 cm<sup>-1</sup>. MS (EI): (relative intensity): *m/z* 630 (M<sup>+</sup>), 495 (13.3), 251 (40.9), 183 (21.6), 135 (100), 93 (21.5), 79 (20.0). HRMS (EI) For [C<sub>36</sub>H<sub>39</sub>O<sub>5</sub>Br]<sup>+</sup> (M<sup>+</sup>): Calcd.: 630.1981, Found: 630.1988. [ $\alpha$ ]<sub>D</sub><sup>20</sup> = 32.79 (*c* = 1.10, CHCl<sub>3</sub>).

**(8*S*,13*R*,14*R*,17*R*)-Adamantan-1-yl 17-(benzylamino)-3-methoxy-7,8,12,13,14,15,16,17-octahydro-6*H*-cyclopenta[*a*]phenanthrene-13-carboxylate (**9**)<sup>30</sup>**

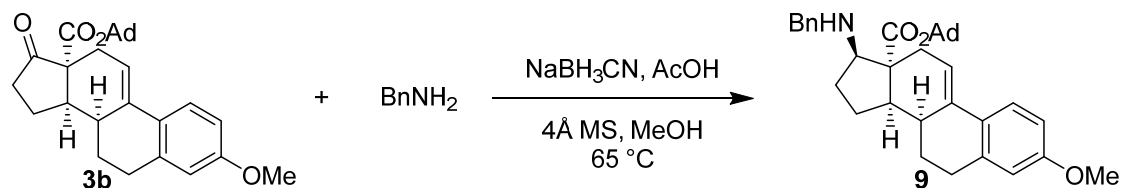

200 mg pre-activated 4 Å Molecular sieves, **3b** (44.7 mg, 0.1 mmol), benzylamine (22  $\mu\text{L}$ , 0.2 mmol, 2 equiv.) and 2 mL MeOH were placed to a dry Schlenk tube, and the reaction mixture was heated to 65 °C and stirred overnight.  $\text{NaBH}_3\text{CN}$  (25.1 mg, 0.4 mmol, 4 equiv.) and acetic acid (23  $\mu\text{L}$ , 0.4 mmol, 4 equiv.) were added sequentially. The reaction mixture was stirred overnight, and then filtered and concentrated in vacuo. The product was purified by flash column chromatography to afford a viscous liquid (44 mg, 82%). **<sup>1</sup>H NMR** (400 MHz, Chloroform-*d*)  $\delta$  7.60 (d,  $J = 8.9$  Hz, 1H), 7.33 (d,  $J = 4.4$  Hz, 4H), 6.72 (dd,  $J = 8.8, 2.8$  Hz, 1H), 6.58 (d,  $J = 2.7$  Hz, 1H), 6.23 (dd,  $J = 5.3, 2.7$  Hz, 1H), 3.78 (s, 4H), 3.71 (d,  $J = 13.1$  Hz, 1H), 3.58 (t,  $J = 8.3$  Hz, 1H), 2.93 – 2.63 (m, 3H), 2.50 (dd,  $J = 18.8, 12.1$  Hz, 2H), 2.33 – 2.22 (m, 1H), 2.12 (d,  $J = 5.1$  Hz, 4H), 2.03 (d,  $J = 2.9$  Hz, 6H), 1.89 – 1.65 (m, 5H), 1.62 (d,  $J = 3.1$  Hz, 5H), 1.49 (ddt,  $J = 12.4, 9.6, 5.0$  Hz, 3H). **<sup>13</sup>C NMR** (101 MHz, Chloroform-*d*)  $\delta$  175.79, 158.23, 140.54, 137.81, 131.38, 128.47, 128.20, 127.40, 127.02, 124.74, 115.43, 113.27, 112.68, 80.39, 65.93, 55.29, 53.13, 52.44, 46.32, 41.27, 36.25, 34.93, 30.85, 30.79, 29.16, 27.62, 23.95, 22.94. **IR** (KBr):  $\nu_{\text{max}}$  2915, 28531709, 1607, 1496, 1456, 1279, 1233, 1210, 1175, 1057, 754  $\text{cm}^{-1}$ . **MS** (EI): (relative intensity):  $m/z$  537 ( $\text{M}^+$ ), 251 (100), 135 (69.82), 91 (49.31). **HRMS** (ESI) For  $[\text{C}_{36}\text{H}_{44}\text{NO}_3]^+$  ( $[\text{M}+\text{H}]^+$ ): Calcd.: 538.3321, Found: 538.3305.  $[\alpha]_{\text{D}}^{20} = 55.27$  ( $c = 1.10, \text{CHCl}_3$ ).

The absolute configuration of 9 was confirmed by NOE

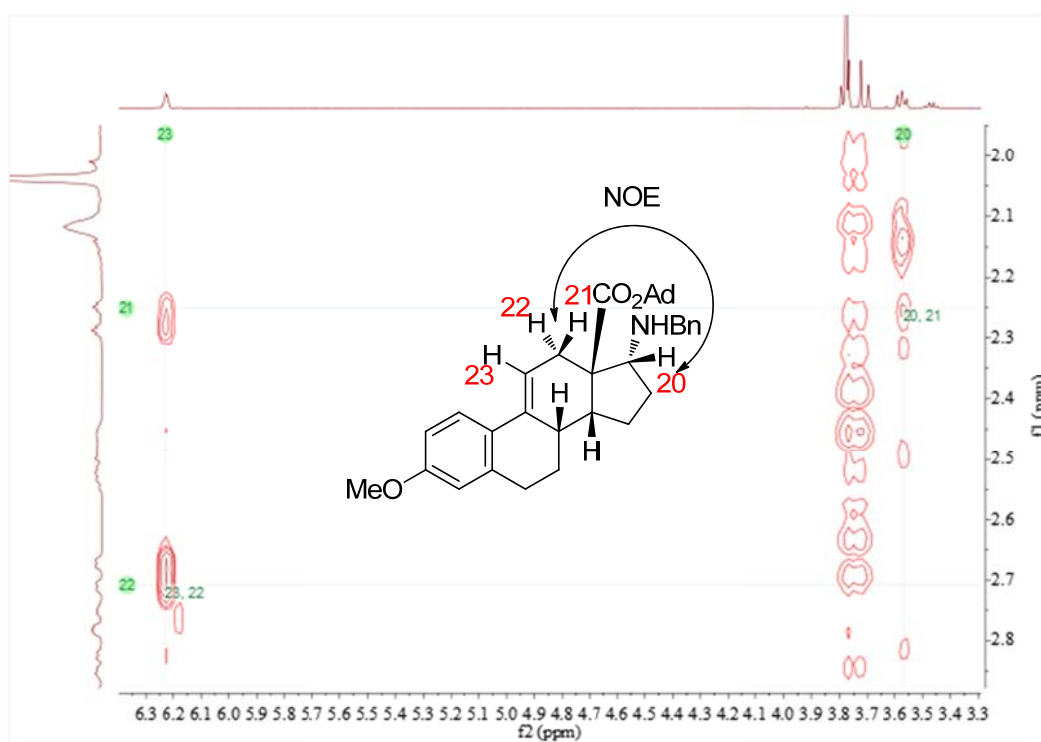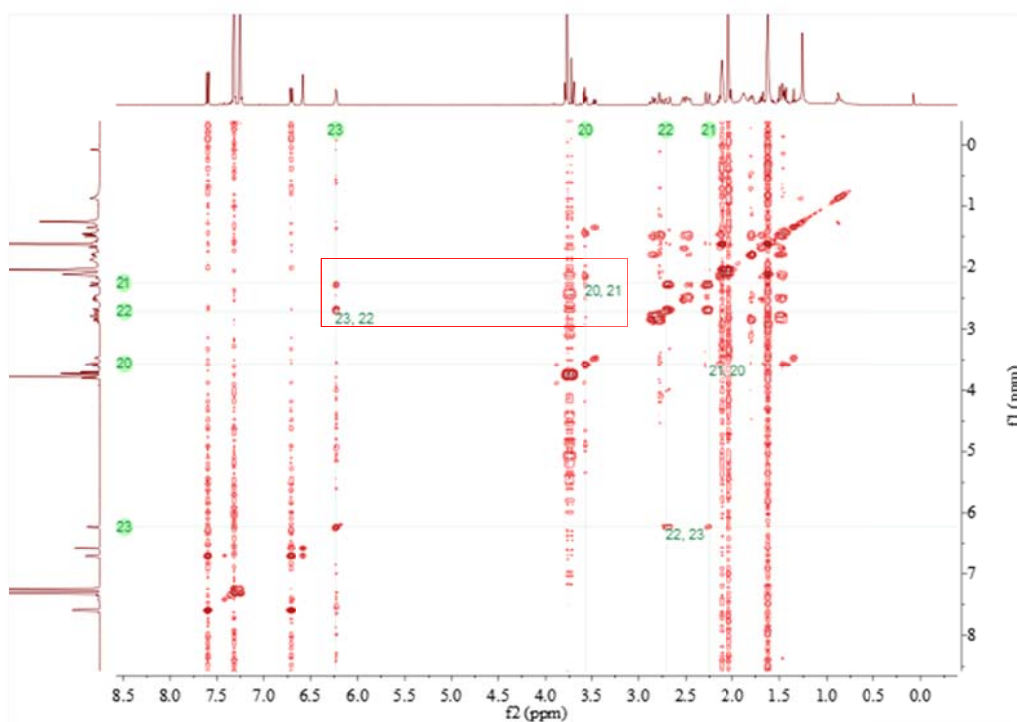

#### 4. High resolution ESI-MS spectrum

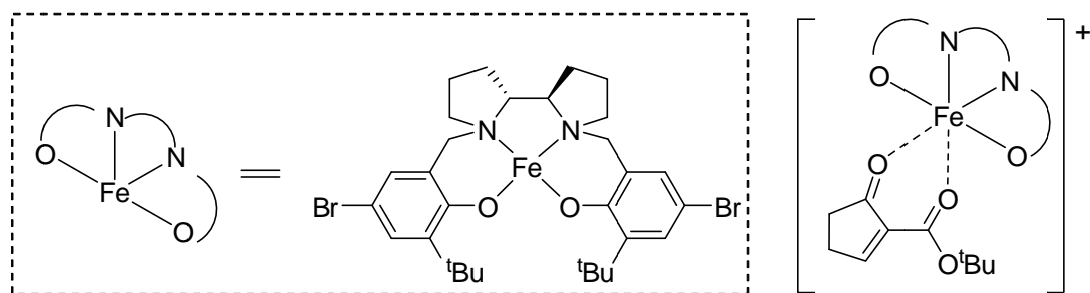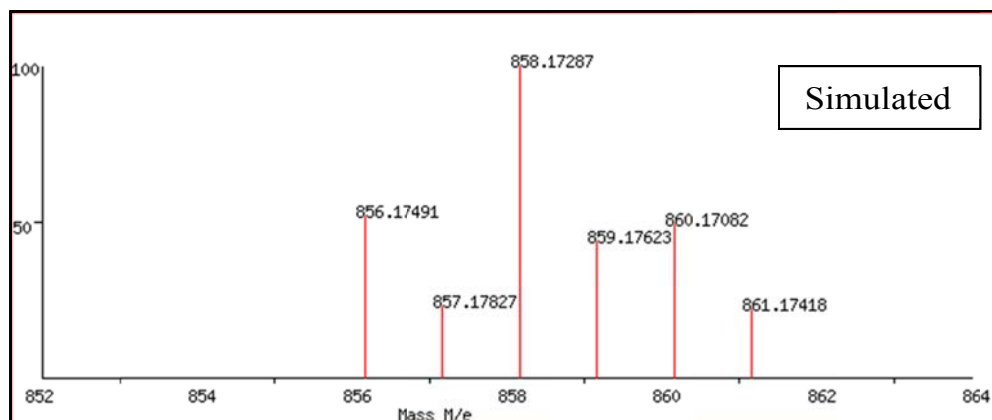

| Sample Name   | 2013105-13-47-1   | Position    | Vial 1 | Instrument Name | Instrument 1 | User Name              |                       |
|---------------|-------------------|-------------|--------|-----------------|--------------|------------------------|-----------------------|
| Inj Vol       | 0.2               | InjPosition |        | SampleType      | Sample       | IRM Calibration Status | Success               |
| Data Filename | 2013105-13-47-1.d | ACQ Method  | TEST.m | Comment         |              | Acquired Time          | 12/18/2017 9:49:32 AM |

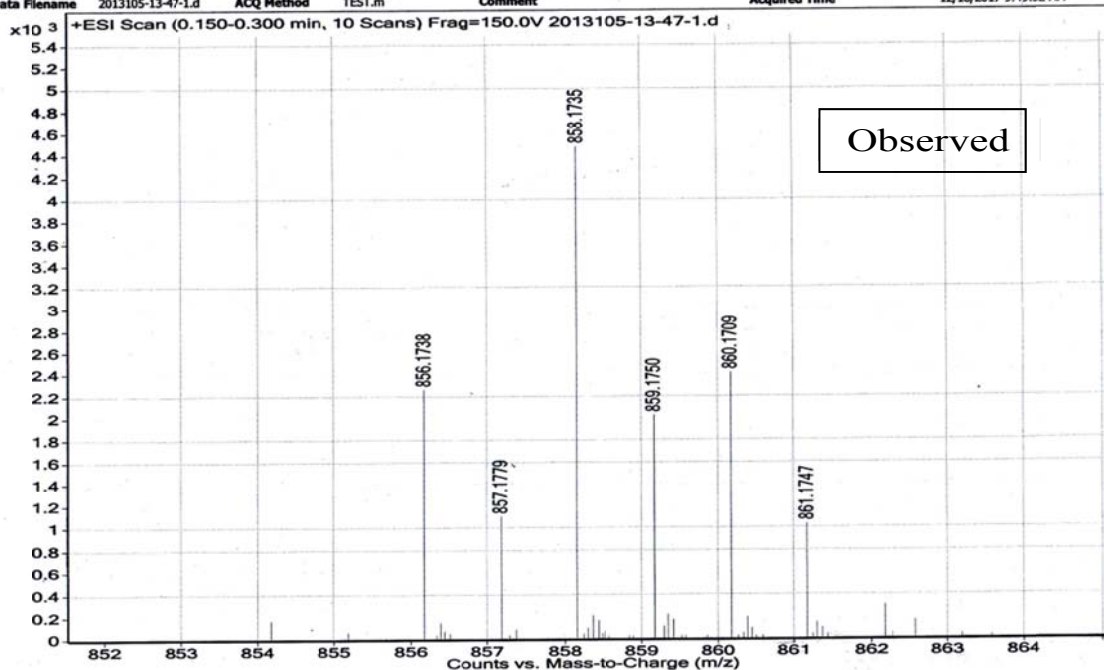

**Fig. S1** Upper: Simulated isotopic distribution pattern for the adduct formed between the deprotonated form of substrate **1c** with catalyst **4a** (with  $\text{ClO}_4$  as counter anion). Lower: Observed isotopic distribution pattern for the peak at  $m/z$  858.2 detected by high-resolution ESI-MS analysis of a reaction mixture of **1c** and **4a** in DCM/MeOH.

## 5. IR spectra

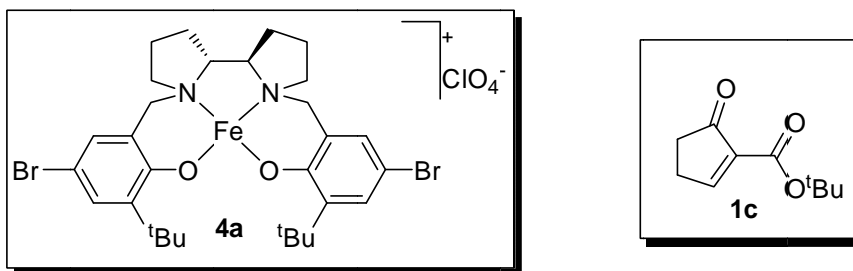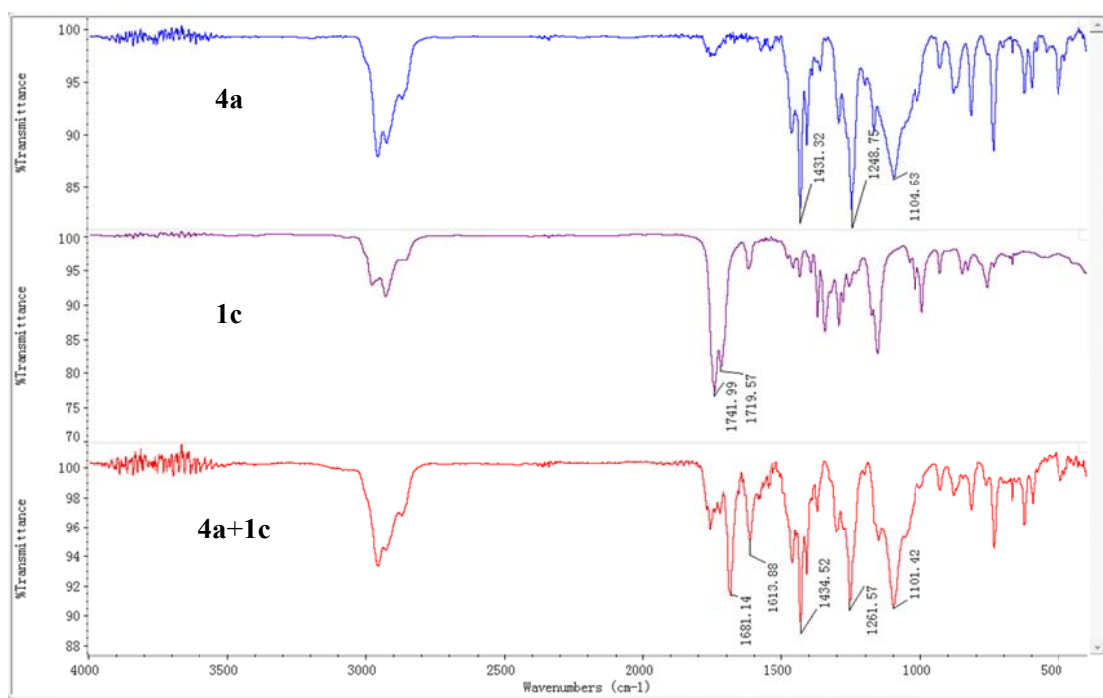

**Fig. S2** Upper: IR spectrum of catalyst **4a**. Middle: IR spectrum of substrate **1c**. Lower: IR spectrum of the adduct formed between catalyst **4a** and substrate **1c**.

## 6. Crystal data of 3s (CCDC 1948562)

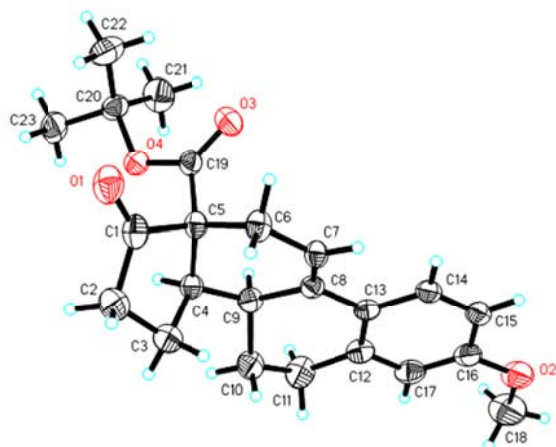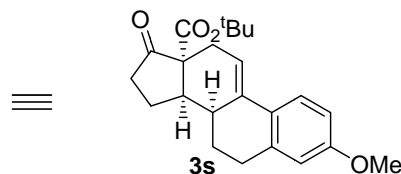

|                                   |                                                |          |
|-----------------------------------|------------------------------------------------|----------|
| Identification code               | cu_d8v17496_0m                                 |          |
| Empirical formula                 | C <sub>23</sub> H <sub>28</sub> O <sub>4</sub> |          |
| Formula weight                    | 368.45                                         |          |
| Temperature                       | 296(2) K                                       |          |
| Wavelength                        | 1.54178 Å                                      |          |
| Crystal system                    | Orthorhombic                                   |          |
| Space group                       | P 21 21 21                                     |          |
| Unit cell dimensions              | a = 8.98190(10) Å                              | α = 90°. |
|                                   | b = 11.9988(2) Å                               | β = 90°. |
|                                   | c = 18.9538(3) Å                               | γ = 90°. |
| Volume                            | 2042.69(5) Å <sup>3</sup>                      |          |
| Z                                 | 4                                              |          |
| Density (calculated)              | 1.198 Mg/m <sup>3</sup>                        |          |
| Absorption coefficient            | 0.647 mm <sup>-1</sup>                         |          |
| F(000)                            | 792                                            |          |
| Crystal size                      | 0.180 x 0.150 x 0.120 mm <sup>3</sup>          |          |
| Theta range for data collection   | 4.666 to 65.974°.                              |          |
| Index ranges                      | -10 ≤ h ≤ 10, -11 ≤ k ≤ 14, -22 ≤ l ≤ 19       |          |
| Reflections collected             | 15052                                          |          |
| Independent reflections           | 3529 [R(int) = 0.0341]                         |          |
| Completeness to theta = 67.679°   | 95.6 %                                         |          |
| Absorption correction             | Semi-empirical from equivalents                |          |
| Max. and min. transmission        | 0.7533 and 0.5750                              |          |
| Refinement method                 | Full-matrix least-squares on F <sup>2</sup>    |          |
| Data / restraints / parameters    | 3529 / 0 / 249                                 |          |
| Goodness-of-fit on F <sup>2</sup> | 1.069                                          |          |
| Final R indices [I > 2σ(I)]       | R1 = 0.0328, wR2 = 0.0867                      |          |

|                              |                                    |
|------------------------------|------------------------------------|
| R indices (all data)         | R1 = 0.0346, wR2 = 0.0887          |
| Absolute structure parameter | 0.08(8)                            |
| Extinction coefficient       | 0.0110(19)                         |
| Largest diff. peak and hole  | 0.132 and -0.086 e.Å <sup>-3</sup> |

## 7. Computational details

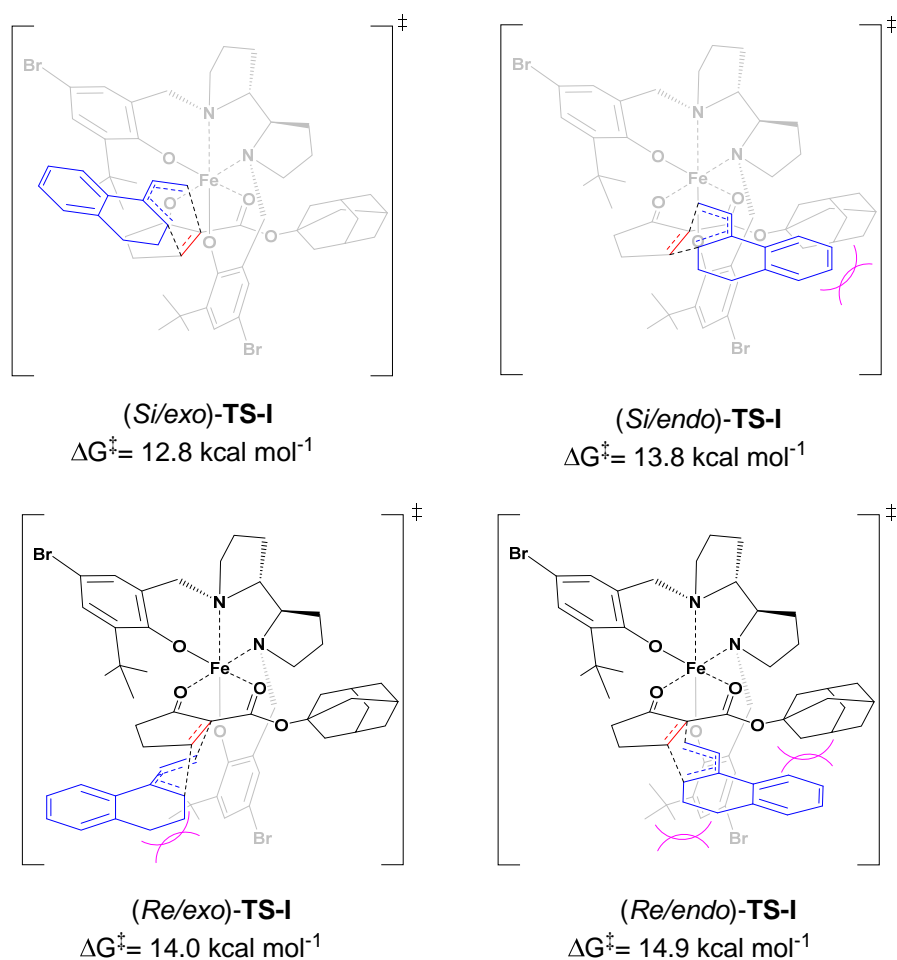

**Fig. S3** Structures and corresponding energies at transition state that account for the stereoselectivity and enantioselectivity in the reaction between **1a** and **2a** using intermediate **I** as catalytic precursor. Steric hindrance was shown in purple.

In this work, all DFT calculations were performed using GAUSSIAN09.<sup>31</sup> Geometries were optimized using the B3LYP functional<sup>32</sup> in combination with def2-SVP basis set.<sup>33</sup> Dispersion correction with Grimme's D3 version was employed.<sup>34, 35</sup> Frequency calculations were carried out for these optimized structures to verify the stationary points or transition states at the same level. Solvent effect was considered by means of the polarizable continuum model (PCM).<sup>36</sup> An alternative set of single-point energies was refined with the triple- $\zeta$  basis set def2-TZVP. The method employed has been proved successful in treating the Fe-catalyzed systems.<sup>37,38</sup> The open-shell unrestricted U-B3LYP is adopted by default in the calculations of doublet ( $S = 1/2$ ), quartet ( $S = 3/2$ ), and sextet ( $S = 5/2$ ) spin states. The stereoselectivity and enantioselectivity was evaluated by

$$ee \text{ or } de = \frac{\exp(-\Delta\Delta G^\ddagger / RT) - 1}{\exp(-\Delta\Delta G^\ddagger / RT) + 1} \quad (1)$$

where  $\Delta\Delta G^\ddagger$  is given by



$$\Delta\Delta G^\ddagger = \Delta G_{\text{favored}}^\ddagger - \Delta G_{\text{disfavored}}^\ddagger \quad (2)$$

$\Delta G^\ddagger$  is the activation Gibbs free energy,  $R$  is the gas constant ( $8.317 \text{ J mol}^{-1} \text{ K}^{-1}$ ), and  $T$  is temperature (298 K) in Kelvin.

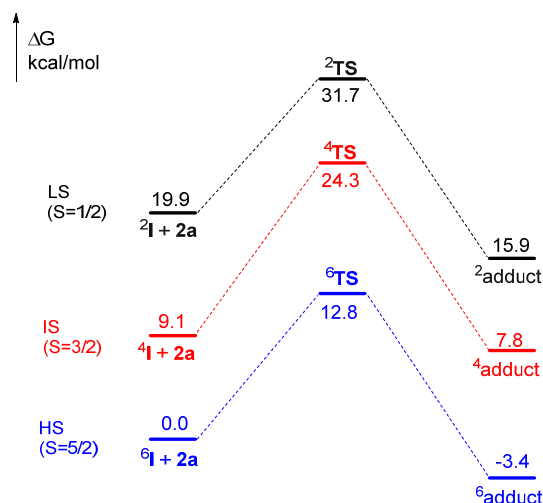

**Fig. S4** The examination of multi-state reactivity for the Fe-BPsalan catalyzed Diels-Alder reaction. HS, high-spin; IS, intermediate-spin; LS, low-spin.

#### Cartesian coordinates of DFT-calculated structures

##### (*Si/exo*)-TS-I

|    |              |              |              |
|----|--------------|--------------|--------------|
| Fe | 1.093228000  | 11.807471000 | 5.212583000  |
| Br | 7.633456000  | 14.326922000 | 3.825484000  |
| Br | -1.408133000 | 8.296685000  | 11.331790000 |
| O  | 2.671091000  | 11.966302000 | 6.301632000  |
| O  | 0.467001000  | 10.183404000 | 5.925036000  |
| N  | 1.311428000  | 13.949617000 | 4.690472000  |
| N  | -0.349981000 | 12.705030000 | 6.673035000  |
| C  | 2.479313000  | 14.536140000 | 5.417402000  |
| H  | 2.235241000  | 14.551516000 | 6.486393000  |
| C  | 3.755118000  | 13.761601000 | 5.248339000  |
| C  | 4.885823000  | 14.323346000 | 4.655415000  |
| H  | 4.842553000  | 15.321677000 | 4.216053000  |
| C  | 6.071567000  | 13.591654000 | 4.655971000  |
| C  | 6.148512000  | 12.339590000 | 5.271070000  |
| H  | 7.105515000  | 11.822345000 | 5.272705000  |
| C  | 5.030607000  | 11.749724000 | 5.877192000  |
| C  | 3.801981000  | 12.465940000 | 5.819269000  |
| C  | 5.127156000  | 10.397152000 | 6.602274000  |
| C  | 4.673120000  | 10.571261000 | 8.068805000  |
| H  | 3.629061000  | 10.904450000 | 8.120420000  |
| H  | 5.305585000  | 11.309103000 | 8.587950000  |
| H  | 4.759163000  | 9.612102000  | 8.604659000  |
| C  | 4.227876000  | 9.356280000  | 5.906419000  |
| H  | 4.286328000  | 8.392492000  | 6.437383000  |
| H  | 4.558530000  | 9.193577000  | 4.869043000  |
| H  | 3.182602000  | 9.679696000  | 5.890161000  |
| C  | 6.565142000  | 9.853917000  | 6.612920000  |
| H  | 7.262423000  | 10.540726000 | 7.117394000  |
| H  | 6.942678000  | 9.664382000  | 5.596076000  |
| H  | 6.588091000  | 8.897331000  | 7.156938000  |
| C  | 0.144827000  | 12.182640000 | 7.979274000  |
| H  | -0.320100000 | 12.735038000 | 8.811474000  |
| H  | 1.224643000  | 12.388660000 | 8.008155000  |
| C  | -0.122223000 | 10.704932000 | 8.169379000  |
| C  | -0.561362000 | 10.258893000 | 9.419016000  |

|   |              |              |              |
|---|--------------|--------------|--------------|
| H | -0.69596000  | 10.971676000 | 10.234553000 |
| C | -0.832169000 | 8.907830000  | 9.611517000  |
| C | -0.718506000 | 7.993225000  | 8.562014000  |
| H | -0.972591000 | 6.952380000  | 8.749290000  |
| C | -0.303499000 | 8.400607000  | 7.290106000  |
| C | 0.041235000  | 9.773883000  | 7.104948000  |
| C | -0.254275000 | 7.416564000  | 6.106376000  |
| C | 1.177084000  | 7.327143000  | 5.535458000  |
| H | 1.516339000  | 8.297227000  | 5.157805000  |
| H | 1.207017000  | 6.595575000  | 4.711428000  |
| H | 1.886171000  | 6.994436000  | 6.309249000  |
| C | -1.227143000 | 7.900817000  | 5.006401000  |
| H | -2.262325000 | 7.920014000  | 5.382171000  |
| H | -1.191261000 | 7.218488000  | 4.141314000  |
| H | -0.963549000 | 8.907932000  | 4.664889000  |
| C | -0.681826000 | 5.999895000  | 6.523129000  |
| H | -0.013082000 | 5.577179000  | 7.288720000  |
| H | -0.643535000 | 5.335727000  | 5.646184000  |
| H | -1.711306000 | 5.976210000  | 6.912179000  |
| C | 1.354516000  | 14.373270000 | 3.269365000  |
| H | 0.708196000  | 13.694883000 | 2.699741000  |
| H | 2.634576000  | 15.578220000 | 5.103378000  |
| C | 0.790991000  | 15.822242000 | 3.257162000  |
| H | 1.592838000  | 16.567454000 | 3.162887000  |
| H | 0.119273000  | 15.961218000 | 2.398711000  |
| C | 0.035935000  | 15.973123000 | 4.607175000  |
| H | -0.976822000 | 16.376331000 | 4.478448000  |
| H | 0.570062000  | 16.639122000 | 5.301149000  |
| C | 0.008340000  | 14.533195000 | 5.129826000  |
| H | -0.743295000 | 13.999044000 | 4.528927000  |
| C | -0.306238000 | 14.203970000 | 6.584266000  |
| H | 0.480420000  | 14.574006000 | 7.252355000  |
| C | -1.703910000 | 14.716614000 | 7.029886000  |
| H | -1.633402000 | 15.328579000 | 7.938350000  |
| H | -2.142030000 | 15.351061000 | 6.246739000  |
| C | -2.550321000 | 13.446028000 | 7.242877000  |
| H | -3.583784000 | 13.557126000 | 6.886179000  |
| H | -2.600814000 | 13.172569000 | 8.307459000  |
| C | -1.786137000 | 12.386116000 | 6.453946000  |
| H | -2.002252000 | 11.353567000 | 6.746726000  |
| H | -1.988290000 | 12.479406000 | 5.382123000  |
| C | 2.744115000  | 9.112035000  | 2.248446000  |
| C | 1.753306000  | 8.110588000  | 1.628907000  |
| C | 0.440149000  | 8.877878000  | 1.495592000  |
| C | 0.535356000  | 10.020738000 | 2.354982000  |
| C | 1.861717000  | 10.177934000 | 2.856196000  |
| H | 3.400904000  | 9.576833000  | 1.495176000  |
| H | 1.576902000  | 7.273168000  | 2.322943000  |
| H | 2.116185000  | 7.676162000  | 0.690599000  |
| H | -0.492389000 | 8.308553000  | 1.511012000  |
| H | 3.398780000  | 8.676459000  | 3.015782000  |
| O | 2.262102000  | 11.020840000 | 3.692357000  |
| C | -0.550354000 | 10.880997000 | 2.757971000  |
| O | -1.632409000 | 10.719782000 | 2.013835000  |
| O | -0.470139000 | 11.707223000 | 3.684713000  |
| C | -3.777123000 | 10.937338000 | 1.045330000  |
| C | -2.932525000 | 11.354132000 | 2.253857000  |
| C | -2.839267000 | 12.884202000 | 2.307341000  |
| C | -4.261456000 | 13.457466000 | 2.462346000  |
| C | -4.882879000 | 12.913748000 | 3.761615000  |
| C | -4.970786000 | 11.378179000 | 3.694448000  |
| C | -5.833299000 | 10.964897000 | 2.489298000  |
| C | -5.199804000 | 11.505589000 | 1.194943000  |
| C | -5.125221000 | 13.040704000 | 1.260702000  |
| C | -3.557027000 | 10.787397000 | 3.532280000  |
| H | -3.302898000 | 11.313701000 | 0.124659000  |
| H | -3.797841000 | 9.837751000  | 0.984008000  |
| H | -2.212602000 | 13.201973000 | 3.148532000  |
| H | -2.368191000 | 13.253203000 | 1.381682000  |

|   |              |              |              |
|---|--------------|--------------|--------------|
| H | -4.195149000 | 14.555907000 | 2.512889000  |
| H | -4.275784000 | 13.222661000 | 4.628295000  |
| H | -5.888381000 | 13.341156000 | 3.905466000  |
| H | -5.414247000 | 10.988858000 | 4.624450000  |
| H | -5.915428000 | 9.866385000  | 2.442248000  |
| H | -6.855126000 | 11.362285000 | 2.602065000  |
| H | -5.801917000 | 11.196098000 | 0.326183000  |
| H | -6.137996000 | 13.464266000 | 1.358577000  |
| H | -4.694285000 | 13.440952000 | 0.327885000  |
| H | -3.601565000 | 9.689669000  | 3.454180000  |
| H | -2.931885000 | 11.027712000 | 4.400201000  |
| H | 2.377768000  | 14.282626000 | 2.884036000  |
| C | 3.396172000  | 7.046232000  | -3.389383000 |
| C | 2.177320000  | 6.688364000  | -2.809939000 |
| C | 1.479984000  | 7.573240000  | -1.983314000 |
| C | 2.033323000  | 8.858816000  | -1.720005000 |
| C | 3.264995000  | 9.205380000  | -2.323113000 |
| C | 3.938844000  | 8.313885000  | -3.148767000 |
| H | 0.399678000  | 6.603608000  | -0.414450000 |
| H | 3.919676000  | 6.339047000  | -4.036521000 |
| H | 1.751724000  | 5.701437000  | -3.006479000 |
| C | 0.177997000  | 7.149945000  | -1.348622000 |
| C | 1.316242000  | 9.800150000  | -0.857359000 |
| H | 3.694693000  | 10.193108000 | -2.161569000 |
| H | 4.884616000  | 8.605994000  | -3.608902000 |
| C | 0.032001000  | 9.460803000  | -0.373142000 |
| C | -0.723272000 | 8.342828000  | -1.048901000 |
| H | -0.600217000 | 10.284258000 | -0.040801000 |
| H | -1.586133000 | 8.040560000  | -0.436982000 |
| H | -0.335159000 | 6.428140000  | -2.000307000 |
| H | -1.137973000 | 8.746208000  | -1.990625000 |
| C | 1.950065000  | 11.014889000 | -0.403049000 |
| H | 3.021134000  | 11.125305000 | -0.576338000 |
| C | 1.329843000  | 11.988729000 | 0.303926000  |
| H | 0.250368000  | 12.017584000 | 0.448616000  |
| H | 1.899807000  | 12.835560000 | 0.689563000  |

*(Si/endo)*-TS-I

|    |              |              |              |
|----|--------------|--------------|--------------|
| Fe | 1.050371000  | 11.689070000 | 5.043862000  |
| Br | 7.689777000  | 13.814355000 | 3.499453000  |
| Br | -1.548772000 | 8.794227000  | 11.437739000 |
| O  | 2.622691000  | 11.889794000 | 6.133127000  |
| O  | 0.356606000  | 10.155498000 | 5.883817000  |
| N  | 1.349601000  | 13.776569000 | 4.343164000  |
| N  | -0.351994000 | 12.760499000 | 6.420791000  |
| C  | 2.541472000  | 14.374428000 | 5.020945000  |
| H  | 2.298365000  | 14.496319000 | 6.083151000  |
| C  | 3.784090000  | 13.535755000 | 4.930138000  |
| C  | 4.939299000  | 13.995019000 | 4.297798000  |
| H  | 4.937496000  | 14.947189000 | 3.763903000  |
| C  | 6.096605000  | 13.223655000 | 4.382981000  |
| C  | 6.122989000  | 12.038590000 | 5.122577000  |
| H  | 7.060927000  | 11.491553000 | 5.189031000  |
| C  | 4.979543000  | 11.552640000 | 5.771742000  |
| C  | 3.777346000  | 12.300058000 | 5.623034000  |
| C  | 5.024293000  | 10.284871000 | 6.640472000  |
| C  | 4.568636000  | 10.636571000 | 8.074471000  |
| H  | 3.536353000  | 11.008573000 | 8.079568000  |
| H  | 5.223431000  | 11.405650000 | 8.514485000  |
| H  | 4.618011000  | 9.740638000  | 8.714254000  |
| C  | 4.092010000  | 9.205688000  | 6.056806000  |
| H  | 4.114799000  | 8.305216000  | 6.691352000  |
| H  | 4.419703000  | 8.918253000  | 5.045927000  |
| H  | 3.059513000  | 9.562485000  | 5.997403000  |
| C  | 6.442015000  | 9.696768000  | 6.724059000  |
| H  | 7.160372000  | 10.409423000 | 7.158154000  |
| H  | 6.818355000  | 9.385098000  | 5.737317000  |
| H  | 6.427583000  | 8.804603000  | 7.368544000  |
| C  | 0.113509000  | 12.329239000 | 7.769475000  |

|   |              |              |              |
|---|--------------|--------------|--------------|
| H | -0.338461000 | 12.963517000 | 8.548849000  |
| H | 1.199349000  | 12.500817000 | 7.793142000  |
| C | -0.203825000 | 10.882092000 | 8.078746000  |
| C | -0.653031000 | 10.558593000 | 9.362078000  |
| H | -0.769074000 | 11.343554000 | 10.111452000 |
| C | -0.955373000 | 9.236777000  | 9.672836000  |
| C | -0.856970000 | 8.229875000  | 8.710051000  |
| H | -1.129189000 | 7.214794000  | 8.989982000  |
| C | -0.432663000 | 8.512748000  | 7.407742000  |
| C | -0.067873000 | 9.858624000  | 7.098592000  |
| C | -0.385885000 | 7.418335000  | 6.324795000  |
| C | 1.050712000  | 7.256679000  | 5.785131000  |
| H | 1.408797000  | 8.184528000  | 5.327435000  |
| H | 1.079587000  | 6.453882000  | 5.030334000  |
| H | 1.745315000  | 6.985033000  | 6.594777000  |
| C | -1.335242000 | 7.805439000  | 5.169007000  |
| H | -2.373618000 | 7.883530000  | 5.527504000  |
| H | -1.304492000 | 7.038142000  | 4.378219000  |
| H | -1.047361000 | 8.766738000  | 4.729943000  |
| C | -0.838974000 | 6.054256000  | 6.870055000  |
| H | -0.186358000 | 5.697743000  | 7.681778000  |
| H | -0.799556000 | 5.308550000  | 6.061385000  |
| H | -1.873526000 | 6.082294000  | 7.245077000  |
| C | 1.404617000  | 14.092820000 | 2.894616000  |
| H | 0.732255000  | 13.398639000 | 2.376730000  |
| H | 2.741348000  | 15.376807000 | 4.616698000  |
| C | 0.896545000  | 15.557050000 | 2.772712000  |
| H | 1.724679000  | 16.261851000 | 2.617330000  |
| H | 0.224793000  | 15.654877000 | 1.908631000  |
| C | 0.156398000  | 15.839122000 | 4.109023000  |
| H | -0.838961000 | 16.274744000 | 3.953432000  |
| H | 0.721899000  | 16.530904000 | 4.750932000  |
| C | 0.071590000  | 14.444420000 | 4.737323000  |
| H | -0.704593000 | 13.898098000 | 4.178850000  |
| C | -0.246704000 | 14.243853000 | 6.213671000  |
| H | 0.559972000  | 14.630502000 | 6.847066000  |
| C | -1.617519000 | 14.847943000 | 6.625193000  |
| H | -1.514971000 | 15.511076000 | 7.493879000  |
| H | -2.028209000 | 15.452739000 | 5.804688000  |
| C | -2.521062000 | 13.634110000 | 6.920165000  |
| H | -3.545886000 | 13.763237000 | 6.545621000  |
| H | -2.592021000 | 13.441658000 | 8.000975000  |
| C | -1.799120000 | 12.486002000 | 6.219583000  |
| H | -2.058403000 | 11.488807000 | 6.589667000  |
| H | -1.994539000 | 12.505974000 | 5.142650000  |
| C | 2.631145000  | 8.589114000  | 2.425605000  |
| C | 1.588011000  | 7.632790000  | 1.819236000  |
| C | 0.396960000  | 8.524207000  | 1.497275000  |
| C | 0.510548000  | 9.687862000  | 2.292201000  |
| C | 1.812752000  | 9.779135000  | 2.880610000  |
| H | 3.379417000  | 8.921516000  | 1.684581000  |
| H | 1.252748000  | 6.910315000  | 2.582379000  |
| H | 1.960510000  | 7.045734000  | 0.970721000  |
| H | -0.586215000 | 8.096841000  | 1.301118000  |
| H | 3.194006000  | 8.167053000  | 3.269249000  |
| O | 2.229393000  | 10.657675000 | 3.663636000  |
| C | -0.565967000 | 10.601469000 | 2.611378000  |
| O | -1.659773000 | 10.353713000 | 1.916584000  |
| O | -0.473780000 | 11.500141000 | 3.467387000  |
| C | -3.914716000 | 10.246866000 | 1.189780000  |
| C | -2.989616000 | 10.900834000 | 2.220012000  |
| C | -3.019106000 | 12.424687000 | 2.064328000  |
| C | -4.461355000 | 12.914596000 | 2.292650000  |
| C | -4.906871000 | 12.517607000 | 3.711535000  |
| C | -4.870783000 | 10.985556000 | 3.859827000  |
| C | -5.817221000 | 10.351439000 | 2.826292000  |
| C | -5.355577000 | 10.738780000 | 1.410971000  |
| C | -5.395218000 | 12.269163000 | 1.254883000  |
| C | -3.436718000 | 10.472179000 | 3.620485000  |

|   |              |              |              |
|---|--------------|--------------|--------------|
| H | -3.573638000 | 10.493923000 | 0.177213000  |
| H | -3.853292000 | 9.152623000  | 1.300257000  |
| H | -2.335899000 | 12.893109000 | 2.784503000  |
| H | -2.671832000 | 12.694688000 | 1.054467000  |
| H | -4.485370000 | 14.010971000 | 2.187464000  |
| H | -4.249487000 | 12.989791000 | 4.459295000  |
| H | -5.926950000 | 12.887703000 | 3.903787000  |
| H | -5.181539000 | 10.702460000 | 4.878005000  |
| H | -5.819444000 | 9.254547000  | 2.937724000  |
| H | -6.849747000 | 10.697939000 | 2.996218000  |
| H | -6.011079000 | 10.269825000 | 0.660176000  |
| H | -6.424928000 | 12.636860000 | 1.393480000  |
| H | -5.082139000 | 12.554193000 | 0.236447000  |
| H | -3.406627000 | 9.373929000  | 3.683772000  |
| H | -2.752964000 | 10.861424000 | 4.380838000  |
| H | 2.423801000  | 13.937598000 | 2.518896000  |
| C | -3.461959000 | 9.896447000  | -3.354299000 |
| C | -2.542551000 | 8.844229000  | -3.344181000 |
| C | -1.409748000 | 8.886512000  | -2.527470000 |
| C | -1.197710000 | 10.013291000 | -1.688896000 |
| C | -2.124837000 | 11.075487000 | -1.728106000 |
| C | -3.248130000 | 11.019026000 | -2.547230000 |
| H | 0.428970000  | 8.105953000  | -3.275349000 |
| H | -4.343879000 | 9.842810000  | -3.996472000 |
| H | -2.702062000 | 7.976330000  | -3.988383000 |
| C | -0.365777000 | 7.800474000  | -2.569841000 |
| C | 0.023220000  | 10.059174000 | -0.874263000 |
| H | -1.984357000 | 11.948186000 | -1.091844000 |
| H | -3.962485000 | 11.844570000 | -2.548708000 |
| C | 0.692340000  | 8.867919000  | -0.555012000 |
| C | 0.236031000  | 7.564277000  | -1.186601000 |
| H | 1.759368000  | 8.966218000  | -0.352592000 |
| H | 1.077805000  | 6.861000000  | -1.249269000 |
| H | -0.797230000 | 6.870418000  | -2.967269000 |
| H | -0.529017000 | 7.084397000  | -0.551715000 |
| C | 0.516091000  | 11.332784000 | -0.396483000 |
| H | -0.105388000 | 12.210504000 | -0.578397000 |
| C | 1.672890000  | 11.515961000 | 0.276599000  |
| H | 2.401768000  | 10.720798000 | 0.427537000  |
| H | 1.962297000  | 12.505670000 | 0.629431000  |

*(Re/exo)*-TS-I

|    |              |              |              |
|----|--------------|--------------|--------------|
| Fe | 0.971229000  | 11.519556000 | 5.262822000  |
| Br | 7.910574000  | 13.070123000 | 3.861138000  |
| Br | -1.274925000 | 10.804240000 | 12.349571000 |
| O  | 2.578710000  | 11.669578000 | 6.300739000  |
| O  | 0.128804000  | 10.346009000 | 6.489795000  |
| N  | 1.565933000  | 13.411539000 | 4.206828000  |
| N  | -0.317795000 | 13.049837000 | 6.298204000  |
| C  | 2.713338000  | 14.032433000 | 4.935231000  |
| H  | 2.377177000  | 14.269916000 | 5.951556000  |
| C  | 3.910709000  | 13.131687000 | 5.035581000  |
| C  | 5.132186000  | 13.472606000 | 4.455721000  |
| H  | 5.227351000  | 14.385555000 | 3.865254000  |
| C  | 6.224790000  | 12.632075000 | 4.656746000  |
| C  | 6.114776000  | 11.478220000 | 5.436459000  |
| H  | 6.999901000  | 10.860550000 | 5.572300000  |
| C  | 4.901239000  | 11.106768000 | 6.030918000  |
| C  | 3.774592000  | 11.949230000 | 5.804975000  |
| C  | 4.782577000  | 9.823893000  | 6.870774000  |
| C  | 4.197363000  | 10.148879000 | 8.262812000  |
| H  | 3.194635000  | 10.584561000 | 8.180132000  |
| H  | 4.846511000  | 10.858439000 | 8.800823000  |
| H  | 4.130874000  | 9.227708000  | 8.864132000  |
| C  | 3.862275000  | 8.823907000  | 6.140129000  |
| H  | 3.768932000  | 7.896929000  | 6.728246000  |
| H  | 4.274495000  | 8.566491000  | 5.151867000  |
| H  | 2.862814000  | 9.244869000  | 5.994550000  |
| C  | 6.147250000  | 9.147335000  | 7.081550000  |

|   |              |              |              |
|---|--------------|--------------|--------------|
| H | 6.860036000  | 9.810545000  | 7.596012000  |
| H | 6.601552000  | 8.822341000  | 6.132882000  |
| H | 6.014619000  | 8.250996000  | 7.706490000  |
| C | 0.186755000  | 12.989945000 | 7.697540000  |
| H | -0.204785000 | 13.841548000 | 8.277123000  |
| H | 1.279529000  | 13.102250000 | 7.646735000  |
| C | -0.170368000 | 11.713023000 | 8.422577000  |
| C | -0.500681000 | 11.811952000 | 9.777757000  |
| H | -0.491881000 | 12.787202000 | 10.267746000 |
| C | -0.846160000 | 10.669921000 | 10.489616000 |
| C | -0.914148000 | 9.428212000  | 9.856569000  |
| H | -1.220297000 | 8.563644000  | 10.440773000 |
| C | -0.611929000 | 9.288261000  | 8.498631000  |
| C | -0.189308000 | 10.446204000 | 7.771890000  |
| C | -0.751808000 | 7.926344000  | 7.798688000  |
| C | 0.627486000  | 7.473732000  | 7.277132000  |
| H | 1.058345000  | 8.214540000  | 6.595852000  |
| H | 0.542484000  | 6.508812000  | 6.751223000  |
| H | 1.330658000  | 7.341785000  | 8.113967000  |
| C | -1.764697000 | 8.058195000  | 6.638653000  |
| H | -2.758923000 | 8.330241000  | 7.027576000  |
| H | -1.862962000 | 7.098890000  | 6.104832000  |
| H | -1.455534000 | 8.828879000  | 5.924102000  |
| C | -1.271978000 | 6.834236000  | 8.747599000  |
| H | -0.586430000 | 6.658220000  | 9.590538000  |
| H | -1.364030000 | 5.887527000  | 8.193420000  |
| H | -2.265313000 | 7.078891000  | 9.154099000  |
| C | 1.842040000  | 13.411102000 | 2.749739000  |
| H | 1.169559000  | 12.685594000 | 2.276282000  |
| H | 3.000407000  | 14.981346000 | 4.458255000  |
| C | 1.518458000  | 14.850389000 | 2.267326000  |
| H | 2.432743000  | 15.447113000 | 2.142041000  |
| H | 1.017315000  | 14.822564000 | 1.289941000  |
| C | 0.604064000  | 15.446098000 | 3.372895000  |
| H | -0.325341000 | 15.870118000 | 2.970749000  |
| H | 1.112993000  | 16.244843000 | 3.932948000  |
| C | 0.325541000  | 14.233765000 | 4.270810000  |
| H | -0.437181000 | 13.622637000 | 3.762649000  |
| C | -0.159573000 | 14.421490000 | 5.697252000  |
| H | 0.576299000  | 14.979165000 | 6.289379000  |
| C | -1.548622000 | 15.110141000 | 5.765944000  |
| H | -1.490644000 | 16.091970000 | 6.253568000  |
| H | -1.935111000 | 15.272489000 | 4.748744000  |
| C | -2.445291000 | 14.116357000 | 6.519464000  |
| H | -3.491749000 | 14.147027000 | 6.185067000  |
| H | -2.440864000 | 14.313245000 | 7.602590000  |
| C | -1.780357000 | 12.777732000 | 6.217562000  |
| H | -2.060062000 | 11.966025000 | 6.896623000  |
| H | -2.003227000 | 12.450531000 | 5.196306000  |
| C | 2.926823000  | 9.430683000  | 1.837280000  |
| C | 2.216485000  | 9.342344000  | 0.474985000  |
| C | 0.729533000  | 9.405094000  | 0.810138000  |
| C | 0.614359000  | 9.972010000  | 2.121126000  |
| C | 1.890278000  | 10.026570000 | 2.762044000  |
| H | 3.841983000  | 10.040030000 | 1.837682000  |
| H | 2.497298000  | 8.454809000  | -0.107797000 |
| H | 2.465736000  | 10.220626000 | -0.142079000 |
| H | 0.038353000  | 9.758409000  | 0.040779000  |
| H | 3.207311000  | 8.439472000  | 2.230656000  |
| O | 2.156930000  | 10.493548000 | 3.887736000  |
| C | -0.573334000 | 10.516206000 | 2.730016000  |
| O | -1.678427000 | 10.216087000 | 2.071212000  |
| O | -0.562420000 | 11.192055000 | 3.776651000  |
| C | -3.938231000 | 9.964203000  | 1.428139000  |
| C | -3.032783000 | 10.610751000 | 2.481418000  |
| C | -3.198281000 | 12.133851000 | 2.435762000  |
| C | -4.666385000 | 12.478671000 | 2.754734000  |
| C | -5.025610000 | 11.939456000 | 4.151382000  |
| C | -4.851230000 | 10.410473000 | 4.180042000  |

|   |              |              |              |
|---|--------------|--------------|--------------|
| C | -5.772709000 | 9.769573000  | 3.129126000  |
| C | -5.406851000 | 10.306610000 | 1.734328000  |
| C | -5.586940000 | 11.834498000 | 1.704347000  |
| C | -3.384148000 | 10.055593000 | 3.867070000  |
| H | -3.650626000 | 10.330714000 | 0.430064000  |
| H | -3.782196000 | 8.873570000  | 1.440783000  |
| H | -2.527820000 | 12.614323000 | 3.160000000  |
| H | -2.921974000 | 12.498714000 | 1.433504000  |
| H | -4.784858000 | 13.573693000 | 2.736065000  |
| H | -4.387425000 | 12.408906000 | 4.916057000  |
| H | -6.066916000 | 12.202752000 | 4.397902000  |
| H | -5.099229000 | 10.026052000 | 5.181976000  |
| H | -5.669826000 | 8.671966000  | 3.153218000  |
| H | -6.825554000 | 10.001807000 | 3.358255000  |
| H | -6.049704000 | 9.838902000  | 0.972061000  |
| H | -6.637111000 | 12.094926000 | 1.914029000  |
| H | -5.349407000 | 12.224924000 | 0.700805000  |
| H | -3.247355000 | 8.962321000  | 3.866415000  |
| H | -2.717251000 | 10.471521000 | 4.631113000  |
| H | 2.873330000  | 13.089822000 | 2.561382000  |
| C | 3.429569000  | 4.189444000  | -0.772783000 |
| C | 2.191510000  | 4.573529000  | -1.294782000 |
| C | 1.353102000  | 5.438197000  | -0.587979000 |
| C | 1.766262000  | 5.919286000  | 0.684274000  |
| C | 3.016976000  | 5.516854000  | 1.200566000  |
| C | 3.845491000  | 4.666502000  | 0.476186000  |
| H | -0.778203000 | 5.230167000  | -0.651333000 |
| H | 4.075390000  | 3.518870000  | -1.343998000 |
| H | 1.870851000  | 4.196747000  | -2.268768000 |
| C | 0.005350000  | 5.856449000  | -1.115373000 |
| C | 0.845730000  | 6.783891000  | 1.425272000  |
| H | 3.358994000  | 5.892049000  | 2.165618000  |
| H | 4.816881000  | 4.376820000  | 0.881254000  |
| C | -0.066328000 | 7.594486000  | 0.699373000  |
| C | -0.242401000 | 7.328336000  | -0.788309000 |
| H | -0.972711000 | 7.895339000  | 1.229470000  |
| H | -1.249082000 | 7.640491000  | -1.100792000 |
| H | -0.051053000 | 5.683067000  | -2.199474000 |
| H | 0.472464000  | 7.934450000  | -1.370137000 |
| C | 0.938793000  | 6.889974000  | 2.853852000  |
| H | 1.773532000  | 6.389954000  | 3.348732000  |
| C | 0.095211000  | 7.623950000  | 3.620391000  |
| H | -0.836278000 | 8.032601000  | 3.233076000  |
| H | 0.275499000  | 7.747622000  | 4.686773000  |

*(Re/endo)*-TS-I

|    |              |              |              |
|----|--------------|--------------|--------------|
| Fe | 1.004734000  | 11.394984000 | 5.201835000  |
| Br | 7.932333000  | 13.087981000 | 3.940172000  |
| Br | -1.554142000 | 10.465575000 | 12.173053000 |
| O  | 2.590429000  | 11.548883000 | 6.273810000  |
| O  | 0.163841000  | 10.171216000 | 6.385134000  |
| N  | 1.583263000  | 13.333263000 | 4.206773000  |
| N  | -0.334313000 | 12.873976000 | 6.247315000  |
| C  | 2.709251000  | 13.947858000 | 4.973239000  |
| H  | 2.353755000  | 14.148929000 | 5.990583000  |
| C  | 3.917934000  | 13.062084000 | 5.065347000  |
| C  | 5.141489000  | 13.435558000 | 4.510668000  |
| H  | 5.231027000  | 14.365924000 | 3.947169000  |
| C  | 6.243065000  | 12.604502000 | 4.701793000  |
| C  | 6.139096000  | 11.427810000 | 5.447461000  |
| H  | 7.030468000  | 10.817964000 | 5.576743000  |
| C  | 4.923634000  | 11.024231000 | 6.016583000  |
| C  | 3.788917000  | 11.858160000 | 5.801509000  |
| C  | 4.812098000  | 9.718644000  | 6.821136000  |
| C  | 4.230767000  | 10.007194000 | 8.222854000  |
| H  | 3.227159000  | 10.443526000 | 8.152591000  |
| H  | 4.880046000  | 10.703932000 | 8.777099000  |
| H  | 4.166148000  | 9.071031000  | 8.800800000  |

|   |              |              |              |
|---|--------------|--------------|--------------|
| C | 3.890384000  | 8.734500000  | 6.070907000  |
| H | 3.814229000  | 7.788326000  | 6.630147000  |
| H | 4.289007000  | 8.513256000  | 5.068599000  |
| H | 2.884810000  | 9.150188000  | 5.955185000  |
| C | 6.179618000  | 9.041171000  | 7.007606000  |
| H | 6.892418000  | 9.691614000  | 7.538053000  |
| H | 6.630551000  | 8.745814000  | 6.047628000  |
| H | 6.052984000  | 8.126744000  | 7.606985000  |
| C | 0.132185000  | 12.776971000 | 7.658358000  |
| H | -0.275220000 | 13.612720000 | 8.249682000  |
| H | 1.225872000  | 12.890484000 | 7.638510000  |
| C | -0.246762000 | 11.481588000 | 8.335902000  |
| C | -0.649669000 | 11.543914000 | 9.673199000  |
| H | -0.673430000 | 12.506163000 | 10.187608000 |
| C | -1.026169000 | 10.381934000 | 10.335503000 |
| C | -1.051946000 | 9.157474000  | 9.667159000  |
| H | -1.383792000 | 8.275873000  | 10.210346000 |
| C | -0.675118000 | 9.054553000  | 8.324424000  |
| C | -0.221723000 | 10.232951000 | 7.651137000  |
| C | -0.761624000 | 7.708858000  | 7.586413000  |
| C | 0.652461000  | 7.277280000  | 7.148157000  |
| H | 1.131640000  | 8.044727000  | 6.531873000  |
| H | 0.609830000  | 6.335092000  | 6.578051000  |
| H | 1.292061000  | 7.111828000  | 8.028967000  |
| C | -1.701943000 | 7.857184000  | 6.368042000  |
| H | -2.719679000 | 8.116303000  | 6.700421000  |
| H | -1.761244000 | 6.904464000  | 5.817334000  |
| H | -1.357271000 | 8.643025000  | 5.685773000  |
| C | -1.334031000 | 6.591636000  | 8.474608000  |
| H | -0.702233000 | 6.398371000  | 9.354845000  |
| H | -1.383960000 | 5.658027000  | 7.893421000  |
| H | -2.352674000 | 6.821451000  | 8.823106000  |
| C | 1.884128000  | 13.384681000 | 2.755489000  |
| H | 1.232388000  | 12.664548000 | 2.245866000  |
| H | 2.990450000  | 14.914879000 | 4.530533000  |
| C | 1.545819000  | 14.833688000 | 2.313898000  |
| H | 2.452786000  | 15.447564000 | 2.223543000  |
| H | 1.061199000  | 14.829793000 | 1.327856000  |
| C | 0.604417000  | 15.379668000 | 3.422106000  |
| H | -0.324695000 | 15.802114000 | 3.017714000  |
| H | 1.091678000  | 16.167481000 | 4.015802000  |
| C | 0.329612000  | 14.135182000 | 4.275489000  |
| H | -0.414278000 | 13.530004000 | 3.734000000  |
| C | -0.179380000 | 14.267840000 | 5.699649000  |
| H | 0.544359000  | 14.808082000 | 6.321892000  |
| C | -1.574715000 | 14.943140000 | 5.777414000  |
| H | -1.533705000 | 15.892244000 | 6.327555000  |
| H | -1.939301000 | 15.170153000 | 4.764628000  |
| C | -2.483192000 | 13.901697000 | 6.449956000  |
| H | -3.516928000 | 13.934557000 | 6.078280000  |
| H | -2.522098000 | 14.048455000 | 7.540201000  |
| C | -1.789934000 | 12.585611000 | 6.114029000  |
| H | -2.077058000 | 11.744059000 | 6.752198000  |
| H | -1.978649000 | 12.294706000 | 5.075253000  |
| C | 3.093666000  | 9.472383000  | 1.744994000  |
| C | 2.388828000  | 9.363331000  | 0.379610000  |
| C | 0.892029000  | 9.363423000  | 0.702773000  |
| C | 0.759385000  | 9.916958000  | 2.017845000  |
| C | 2.025050000  | 10.006619000 | 2.672455000  |
| H | 3.969041000  | 10.137913000 | 1.749668000  |
| H | 2.714345000  | 8.496312000  | -0.210003000 |
| H | 2.601729000  | 10.256777000 | -0.229478000 |
| H | 0.192786000  | 9.703539000  | -0.061044000 |
| H | 3.444518000  | 8.497421000  | 2.127009000  |
| O | 2.258875000  | 10.455704000 | 3.812942000  |
| C | -0.447757000 | 10.463137000 | 2.590430000  |
| O | -1.507549000 | 10.259837000 | 1.833225000  |
| O | -0.482961000 | 11.081722000 | 3.671883000  |
| C | -3.695920000 | 10.268857000 | 0.935481000  |



|   |              |              |              |
|---|--------------|--------------|--------------|
| C | -2.869985000 | 10.717498000 | 2.144996000  |
| C | -2.937382000 | 12.243937000 | 2.265477000  |
| C | -4.408112000 | 12.655557000 | 2.480868000  |
| C | -4.943772000 | 11.988118000 | 3.760699000  |
| C | -4.864918000 | 10.457720000 | 3.621692000  |
| C | -5.703311000 | 10.006167000 | 2.413456000  |
| C | -5.164845000 | 10.676616000 | 1.137274000  |
| C | -5.252873000 | 12.205800000 | 1.276985000  |
| C | -3.396534000 | 10.038483000 | 3.413626000  |
| H | -3.281520000 | 10.731527000 | 0.025765000  |
| H | -3.610706000 | 9.181475000  | 0.822085000  |
| H | -2.322418000 | 12.589377000 | 3.104245000  |
| H | -2.535811000 | 12.699685000 | 1.346178000  |
| H | -4.455536000 | 13.751342000 | 2.584565000  |
| H | -4.362612000 | 12.318991000 | 4.635681000  |
| H | -5.987441000 | 12.296558000 | 3.934105000  |
| H | -5.241779000 | 9.979897000  | 4.539828000  |
| H | -5.660321000 | 8.909511000  | 2.309974000  |
| H | -6.760484000 | 10.278304000 | 2.565667000  |
| H | -5.749422000 | 10.343417000 | 0.265181000  |
| H | -6.301669000 | 12.514420000 | 1.417187000  |
| H | -4.890523000 | 12.692575000 | 0.356326000  |
| H | -3.327761000 | 8.947357000  | 3.291802000  |
| H | -2.785238000 | 10.317261000 | 4.281832000  |
| H | 2.923920000  | 13.087357000 | 2.575262000  |
| C | -4.611686000 | 6.608341000  | -0.375615000 |
| C | -3.522858000 | 7.000769000  | -1.157679000 |
| C | -2.259749000 | 7.193345000  | -0.592322000 |
| C | -2.088623000 | 7.002876000  | 0.804453000  |
| C | -3.195332000 | 6.582892000  | 1.576916000  |
| C | -4.443014000 | 6.386520000  | 0.996226000  |
| H | -1.093136000 | 8.749297000  | -1.469768000 |
| H | -5.590444000 | 6.463854000  | -0.838066000 |
| H | -3.654559000 | 7.160591000  | -2.230433000 |
| C | -1.095331000 | 7.645176000  | -1.436012000 |
| C | -0.779792000 | 7.238275000  | 1.416088000  |
| H | -3.077569000 | 6.389756000  | 2.642595000  |
| H | -5.284339000 | 6.060039000  | 1.610145000  |
| C | 0.365880000  | 7.436852000  | 0.595614000  |
| C | 0.231553000  | 7.133560000  | -0.879475000 |
| H | 1.301955000  | 7.101368000  | 1.048641000  |
| H | 1.075640000  | 7.558546000  | -1.441464000 |
| H | -1.233411000 | 7.313248000  | -2.475007000 |
| H | 0.291731000  | 6.038325000  | -1.012526000 |
| C | -0.666241000 | 7.371459000  | 2.838461000  |
| H | -1.583677000 | 7.425899000  | 3.423038000  |
| C | 0.500044000  | 7.595733000  | 3.494509000  |
| H | 1.472759000  | 7.460534000  | 3.025473000  |
| H | 0.504375000  | 7.833323000  | 4.557350000  |

## 8. References

- 1 X. Gu, Y. Zhang, Z.-J. Xu and C.-M. Che, *Chem. Commun.*, 2014, **50**, 7870.
- 2 R. L. Oliveira, T. Nijholt, M. Shakeri, P. E. de Jongh, R. J. M. Klein Gebbink and K. P. de Jong, *Catal. Sci. Technol.*, 2016, **6**, 5124.
- 3 K. Pal, *Synthesis*, 1995, **1995**, 1485.
- 4 Y. S. Hon, T. W. Tseng and C. Y. Cheng, *Chem. Commun.*, 2009, 5618.
- 5 E. Richmond, N. Duguet, A. M. Slawin, T. Lebl and A. D. Smith, *Org. Lett.*, 2012, **14**, 2762.
- 6 Y. Yu, Z. Wang and X. Zhang, *Sci. China Chem.*, 2013, **57**, 276.
- 7 A. Arcadi, S. Cacchi, G. Fabrizi and L. Moro, *Eur. J. Org. Chem.*, 1999, **1999**, 1137.
- 8 I. Genentech, J. Liang, D. F. Ortwine, X. Wang and J. Zbieg, US2017/129855, 2017.
- 9 K. Nogi, T. Fujihara, J. Terao and Y. Tsuji, *J. Org. Chem.*, 2015, **80**, 11618.
- 10 S. Wang, B. Zhou, Y. Hu, C. Y. Yang and C. Qin, WO2017142881, 2017.
- 11 X. Su, H. Huang, Y. Yuan and Y. Li, *Angew. Chem. Int. Ed.*, 2017, **56**, 1338.
- 12 T. Si, B. Li, W. Xiong, B. Xu and W. Tang, *Org. Biomol. Chem.*, 2017, **15**, 9903.
- 13 H. Konishi, T. Ueda and K. Manabe, *Org. Synth.*, 2014, **91**, 39.
- 14 C. I. Stathakis, E. Neokosmidis and T. V. Koftis, *Eur. J. Org. Chem.*, 2014, **2014**, 6376.
- 15 L. D. Quin, A. N. Hughes, H. F. Lawson and A. L. Good, *Tetrahedron*, 1983, **39**, 401.
- 16 J. A. Hyatt, G. S. Kottas and J. Effler, *Org. Proc. Res. Dev.*, 2002, **6**, 782.
- 17 D. Fiorito, S. Folliet, Y. Liu and C. Mazet, *ACS Catal.*, 2018, **8**, 1392.
- 18 R. R. Juo and W. Herz, *J. Org. Chem.*, 1985, **50**, 700.
- 19 M. E. Bunnage, S. G. Davies, R. M. Parkin, P. M. Roberts, A. D. Smith and J. M. Withey, *Org. Biomol. Chem.*, 2004, **2**, 3337.
- 20 J. H. Babler and S. J. Sarussi, *J. Org. Chem.*, 1987, **52**, 3462.
- 21 C. Palomo, M. Oiarbide, J. M. Garcia, P. Banuelos, J. M. Odriozola, J. Razkin and A. Linden, *Org. Lett.*, 2008, **10**, 2637.
- 22 J. Comelles, A. Pericas, M. Moreno-Manas, A. Vallribera, G. Drudis-Sole, A. Lledos, T. Parella, A. Roglans, S. Garcia-Granda and L. Roces-Fernandez, *J. Org. Chem.*, 2007, **72**, 2077.
- 23 M. Szostak, M. Spain, K. A. Choquette, R. A. Flowers and D. J. Procter, *J. Am. Chem. Soc.*, 2013, **135**, 15702.

- 24 T. Ohfusa and A. Nishida, *Tetrahedron*, 2011, **67**, 1893.
- 25 C. Schotes and A. Mezzetti, *J. Am. Chem. Soc.*, 2010, **132**, 3652.
- 26 M. Kato, V. P. Kamat and A. Yoshikoshi, *Synthesis*, 1988, **1988**, 699.
- 22 J. Comelles, A. Pericas, M. Moreno-Manas, A. Vallribera, G. Drudis-Sole, A. Lledos, T. Parella, A. Roglans, S. Garcia-Granda and L. Roces-Fernandez, *J. Org. Chem.*, 2007, **72**, 2077.
- 23 M. Szostak, M. Spain, K. A. Choquette, R. A. Flowers and D. J. Procter, *J. Am. Chem. Soc.*, 2013, **135**, 15702.
- 24 T. Ohfusa and A. Nishida, *Tetrahedron*, 2011, **67**, 1893.
- 25 C. Schotes and A. Mezzetti, *J. Am. Chem. Soc.*, 2010, **132**, 3652.
- 26 M. Kato, V. P. Kamat and A. Yoshikoshi, *Synthesis*, 1988, **1988**, 699.
- 27 A. Bugarin, K. D. Jones and B. T. Connell, *Chem. Commun.*, 2010, **46**, 1715.
- 28 T. Ooi, T. Miki, M. Taniguchi, M. Shiraishi, M. Takeuchi and K. Maruoka, *Angew. Chem. Int. Ed.*, 2003, **42**, 3796.
- 29 E. Kleinpeter, P. Werner and T. Linker, *Tetrahedron*, 2017, **73**, 3801.
- 30 J. K. Pokorski, M. A. Witschi, B. L. Purnell and D. H. Appella, *J. Am. Chem. Soc.*, 2004, **126**, 15067.
- 31 M. J. Frisch, G. W. Trucks, H. B. Schlegel, G. E. Scuseria, M. A. Robb, J. R. Cheeseman, G. Scalmani, V. Barone, B. Mennucci, G. A. Petersson, H. Nakatsuji, M. Caricato, X. Li, H. P. Hratchian, A. F. Izmaylov, J. Bloino, G. Zheng, J. L. Sonnenberg, M. Hada, M. Ehara, K. Toyota, R. Fukuda, J. Hasegawa, M. Ishida, T. Nakajima, Y. Honda, O. Kitao, H. Nakai, T. Vreven, J. A. Montgomery, Jr., J. E. Peralta, F. Ogliaro, M. Bearpark, J. J. Heyd, E. Brothers, K. N. Kudin, V. N. Staroverov, R. Kobayashi, J. Normand, K. Raghavachari, A. Rendell, J. C. Burant, S. S. Iyengar, J. Tomasi, M. Cossi, N. Rega, J. M. Millam, M. Klene, J. E. Knox, J. B. Cross, V. Bakken, C. Adamo, J. Jaramillo, R. Gomperts, R. E. Stratmann, O. Yazyev, A. J. Austin, R. Cammi, C. Pomelli, J. W. Ochterski, R. L. Martin, K. Morokuma, V. G. Zakrzewski, G. A. Voth, P. Salvador, J. J. Dannenberg, S. Dapprich, A. D. Daniels, Ö. Farkas, J. B. Foresman, J. V. Ortiz, J. Cioslowski and D. J. Fox, *Gaussian 09 Revision D.01*, Gaussian Inc., Wallingford CT, 2013.
- 32 (a) A. D. Becke, *J. Chem. Phys.*, 1993, **98**, 1372; (b) C. Lee, W. T. Yang and R. G. Parr, *Phys. Rev. B*, 1988, **37**, 785.
- 33 F. Weigend and R. Ahlrichs, *Phys. Chem. Chem. Phys.*, 2005, **7**, 3297.
- 34 S. Grimme, J. Antony, S. Ehrlich and H. Krieg, *J. Chem. Phys.*, 2010, **132**, 154104.
- 35 S. Grimme, S. Ehrlich and L. Goerigk, *J. Comput. Chem.*, 2011, **32**, 1456.
- 36 M. Cossi, G. Scalmani, N. Rega and V. Barone, *J. Chem. Phys.*, 2002, **117**, 43.

37 J. Wei, L. Wu, H.-X. Wang, X. Zhang, C.-W. Tse, C.-Y. Zhou, J.-S. Huang and C.-M. Che, *Angew. Chem. Int. Ed.*, 2020, **59**, 16561.

38 C. Wang and H. Chen, *J. Am. Chem. Soc.*, 2017, **139**, 13038.

## 9. NMR spectra

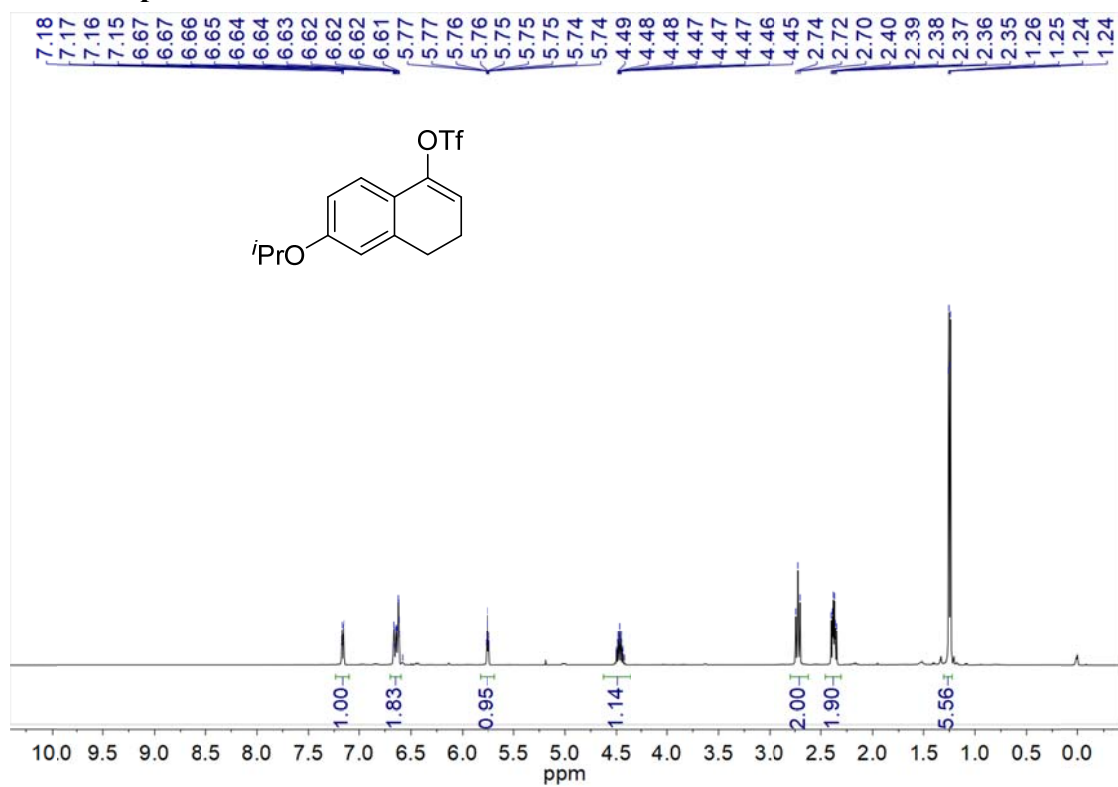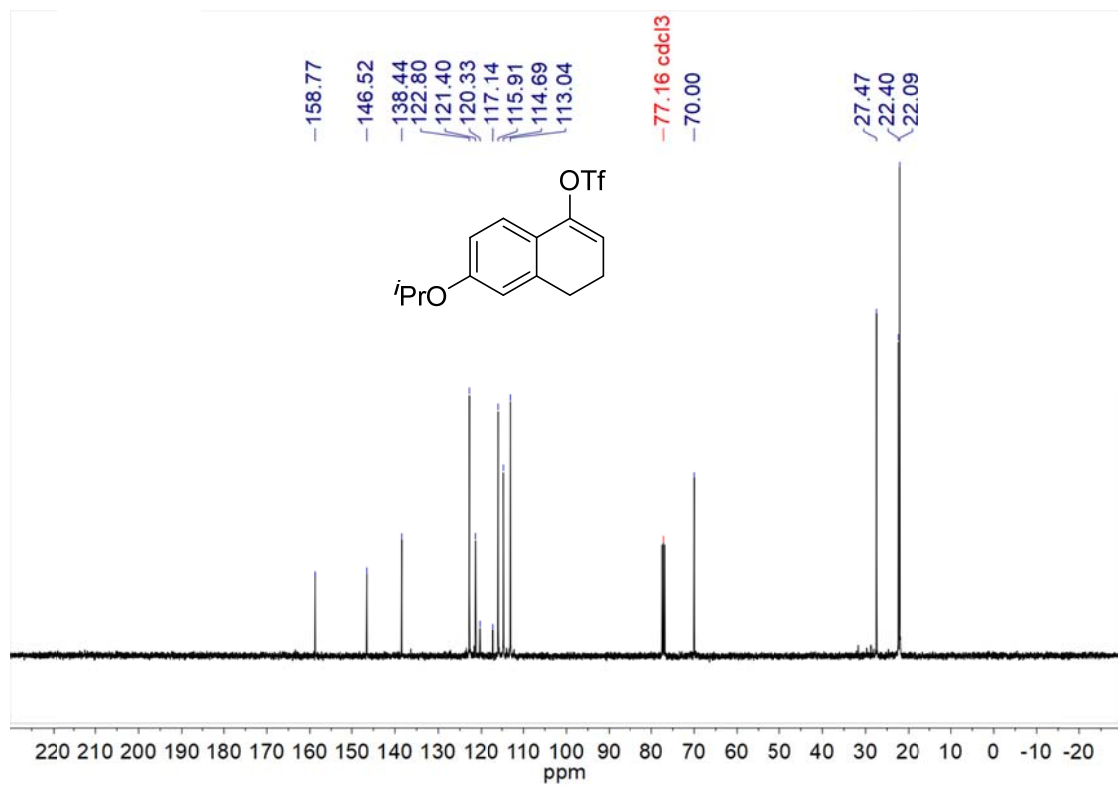

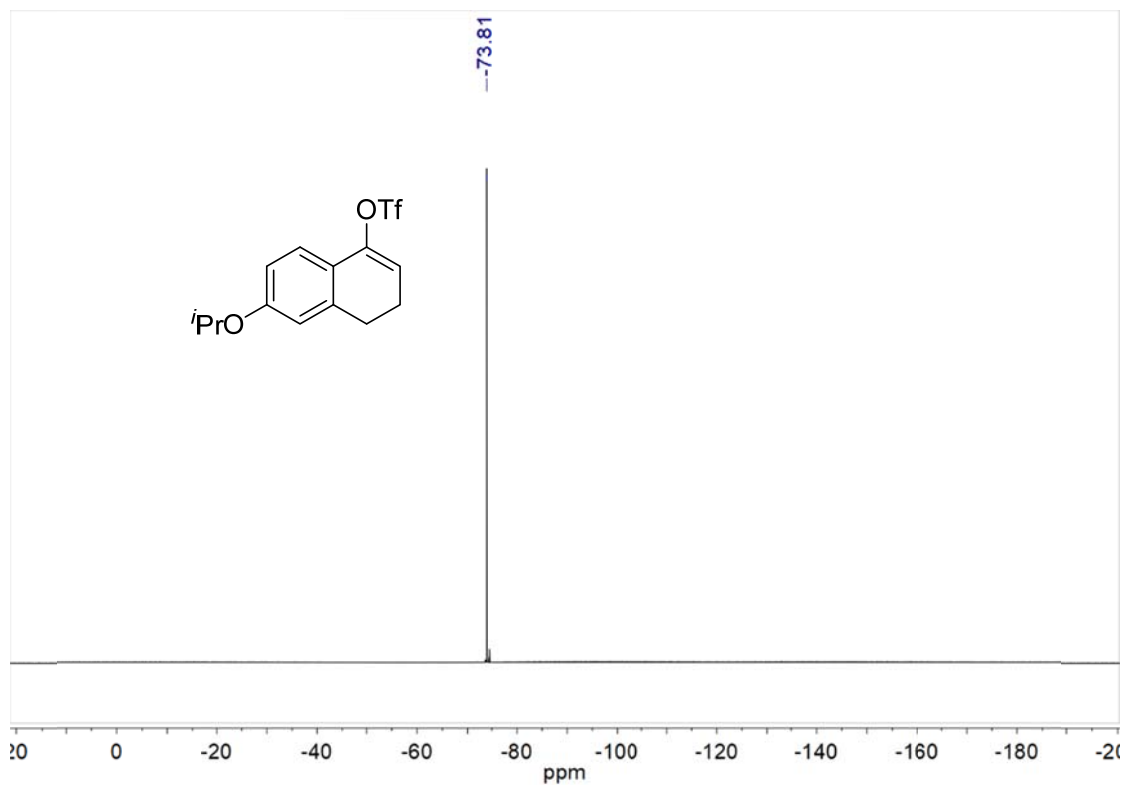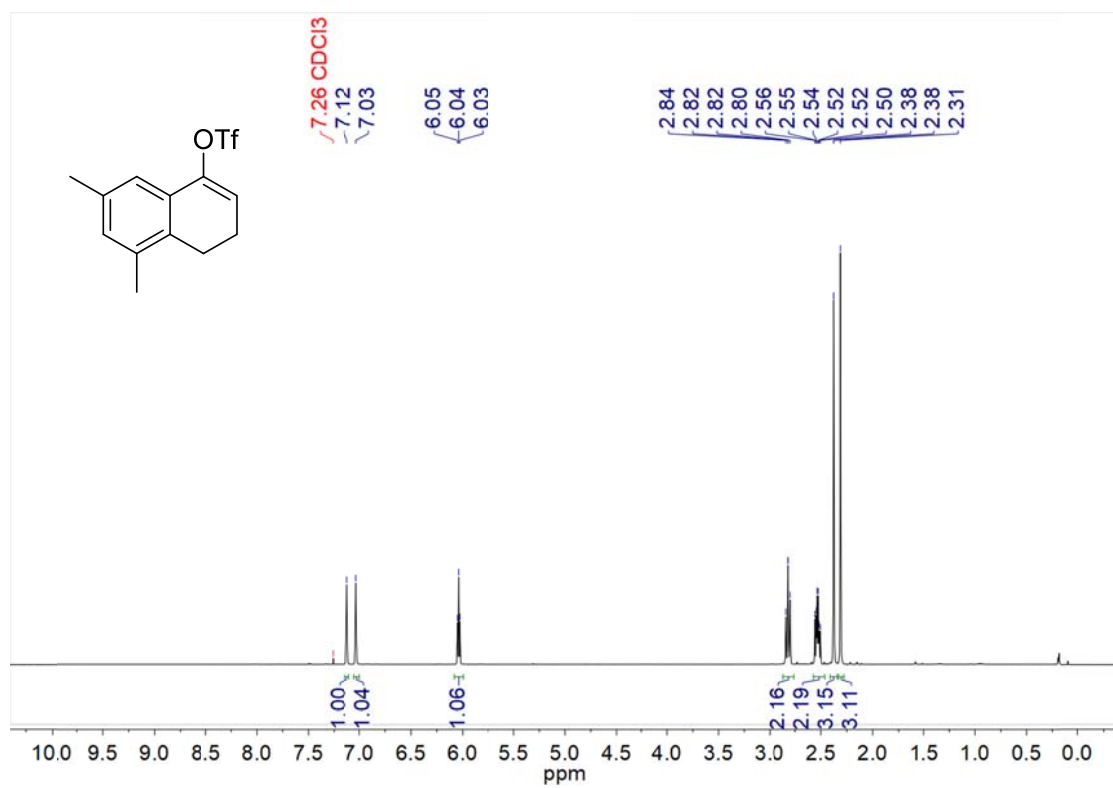

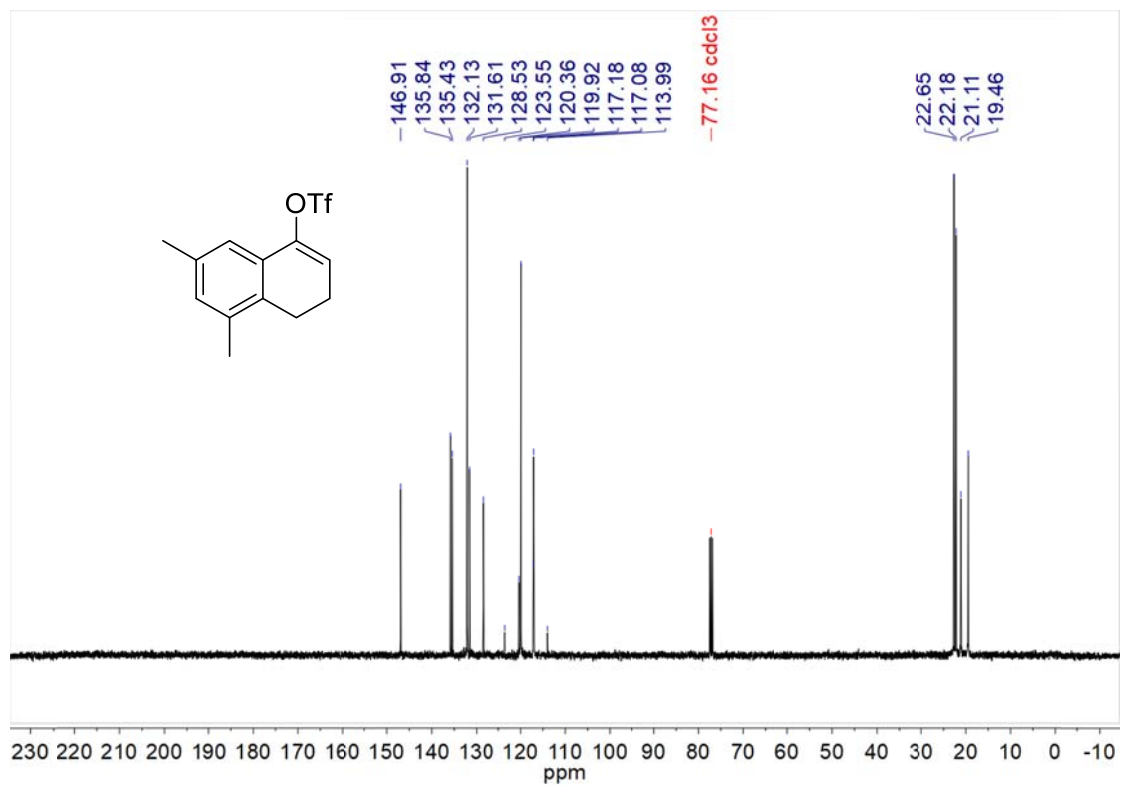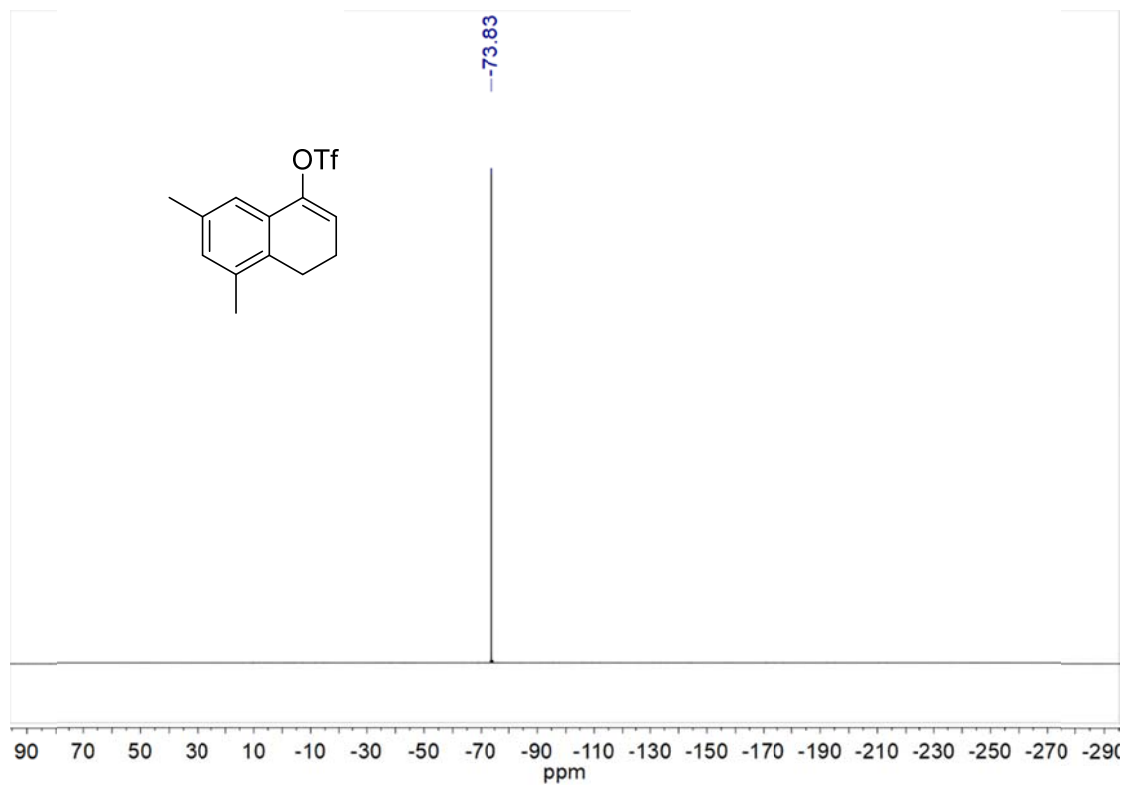

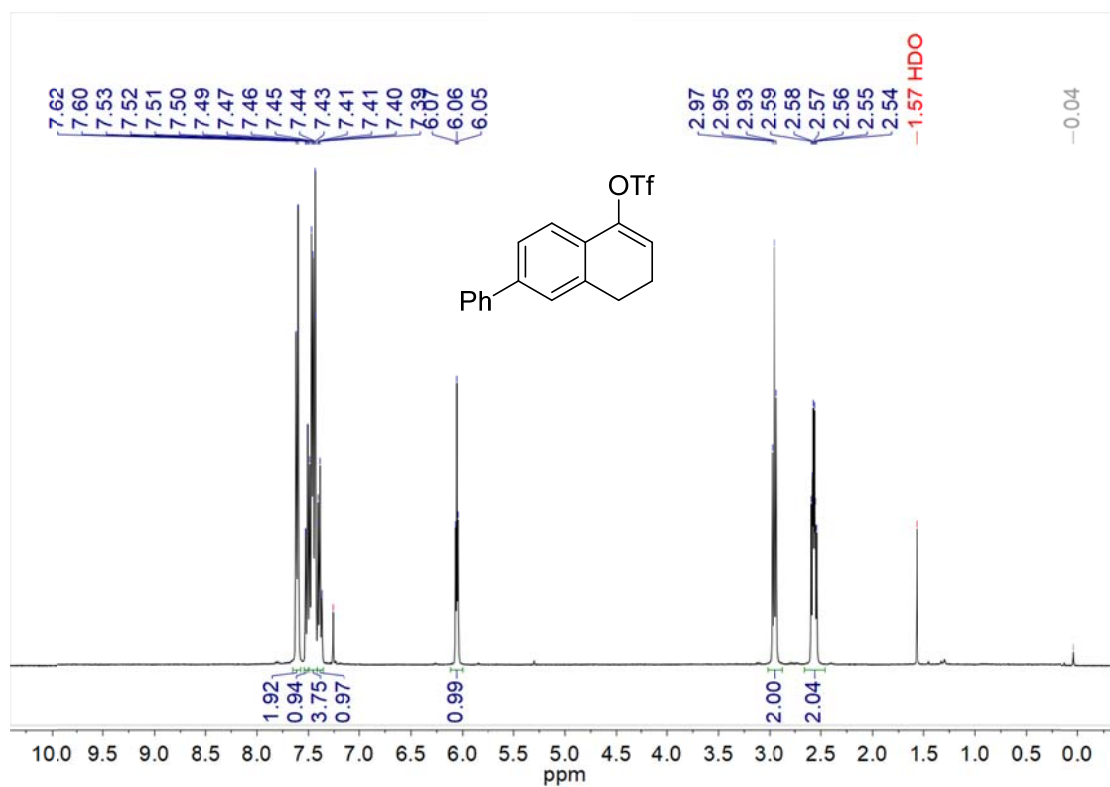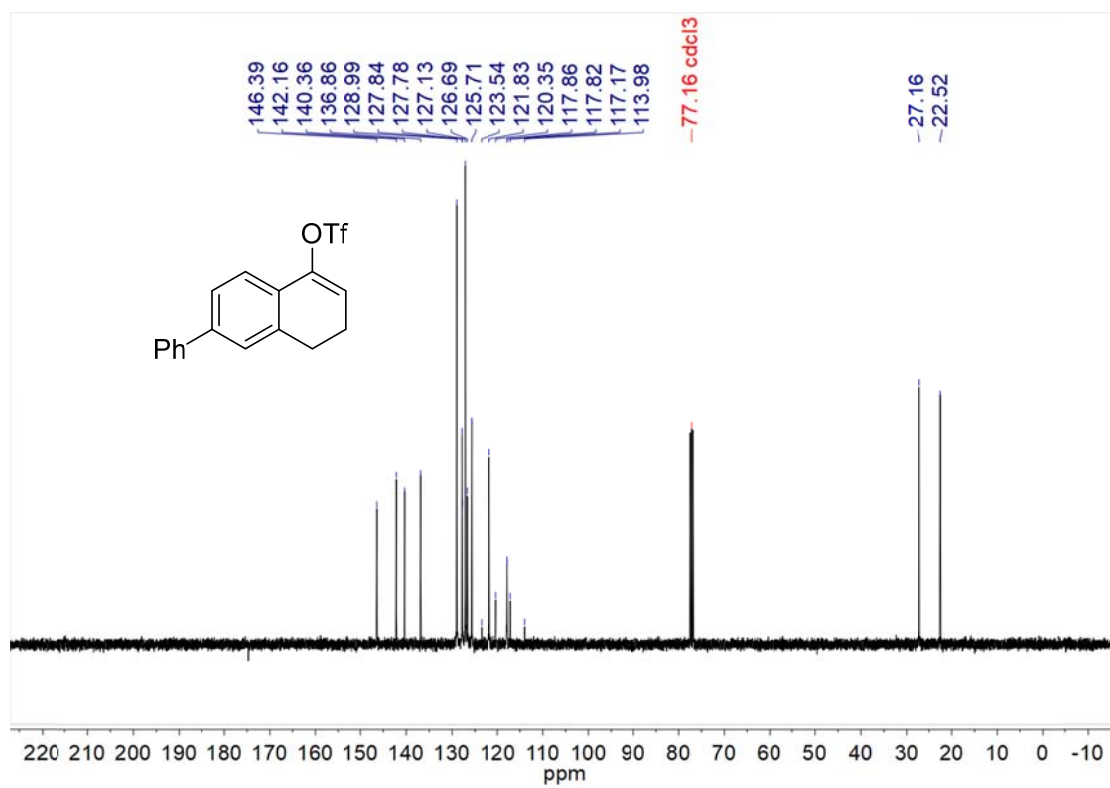



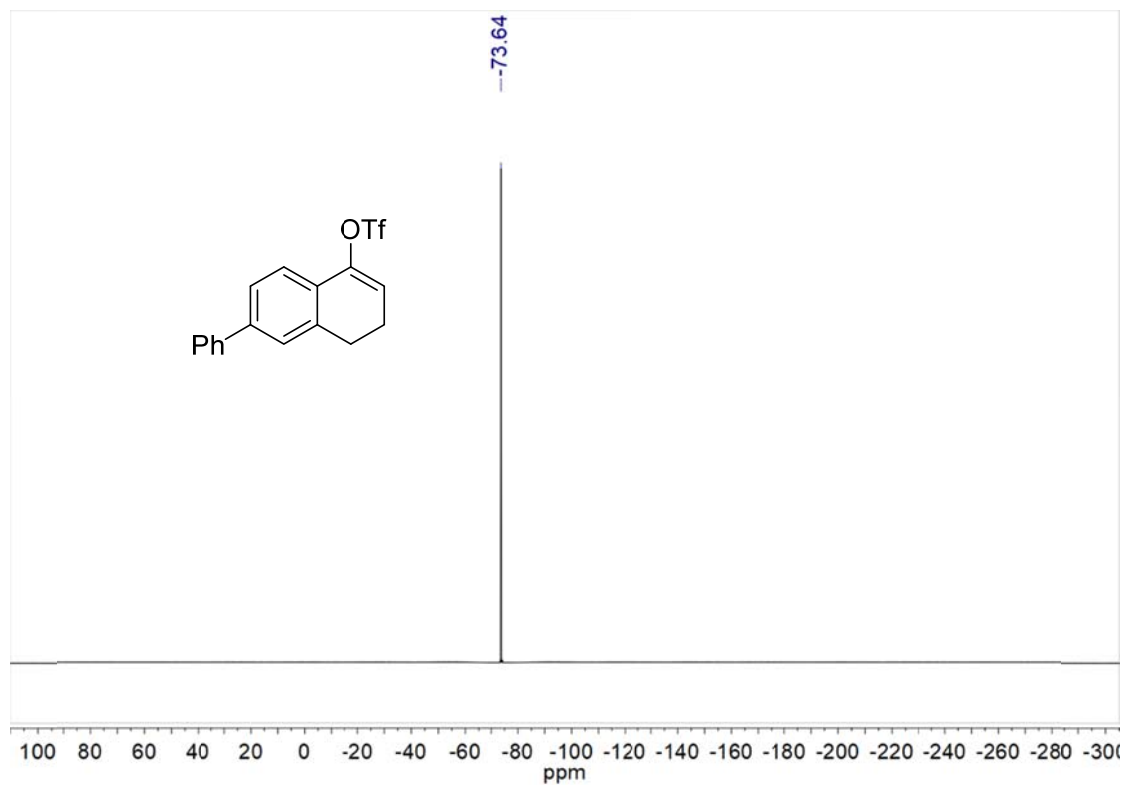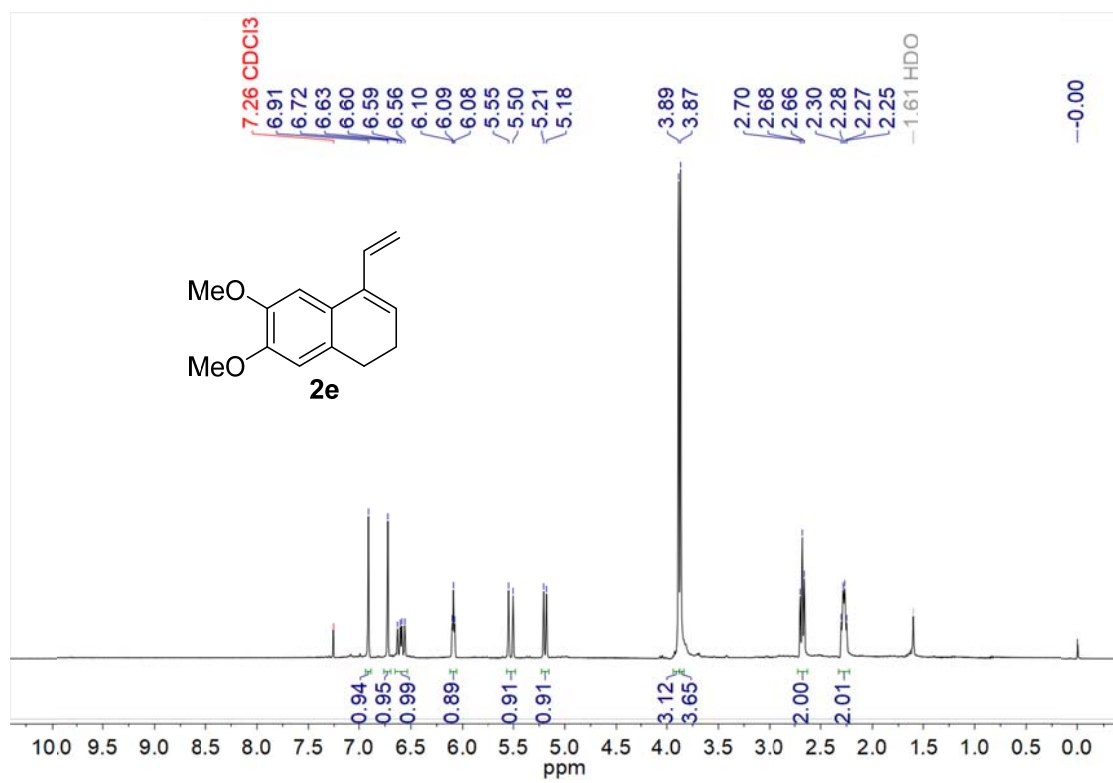

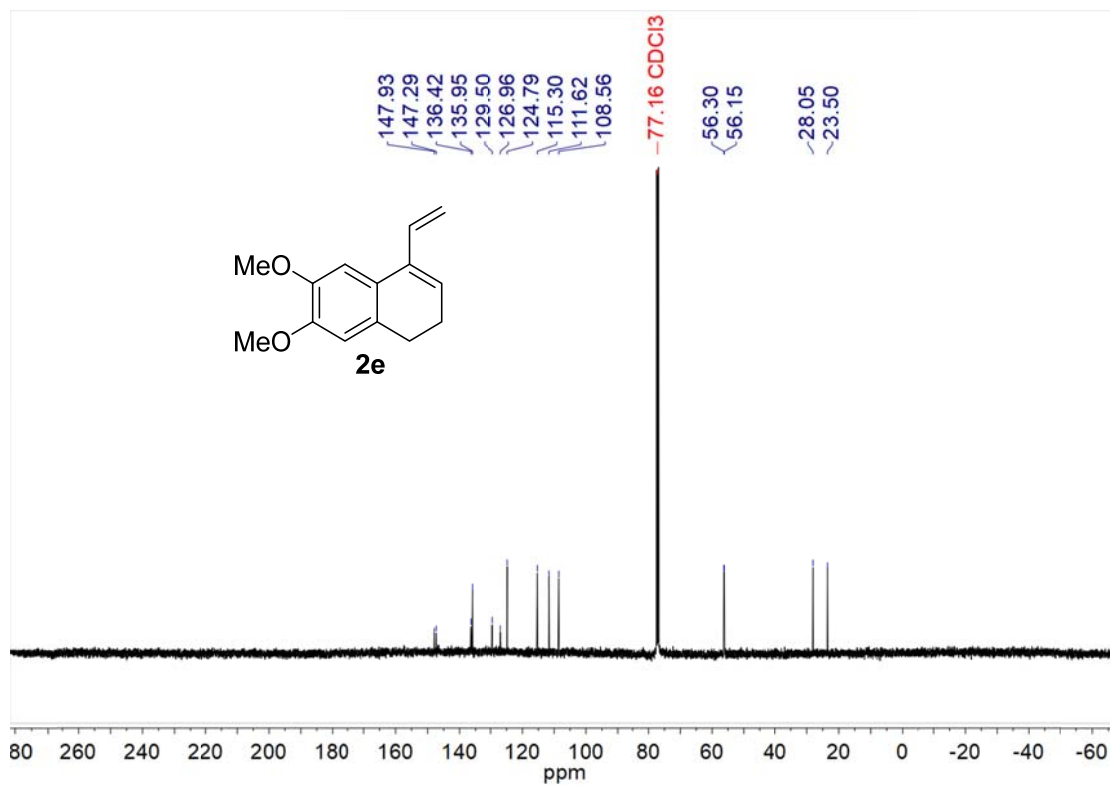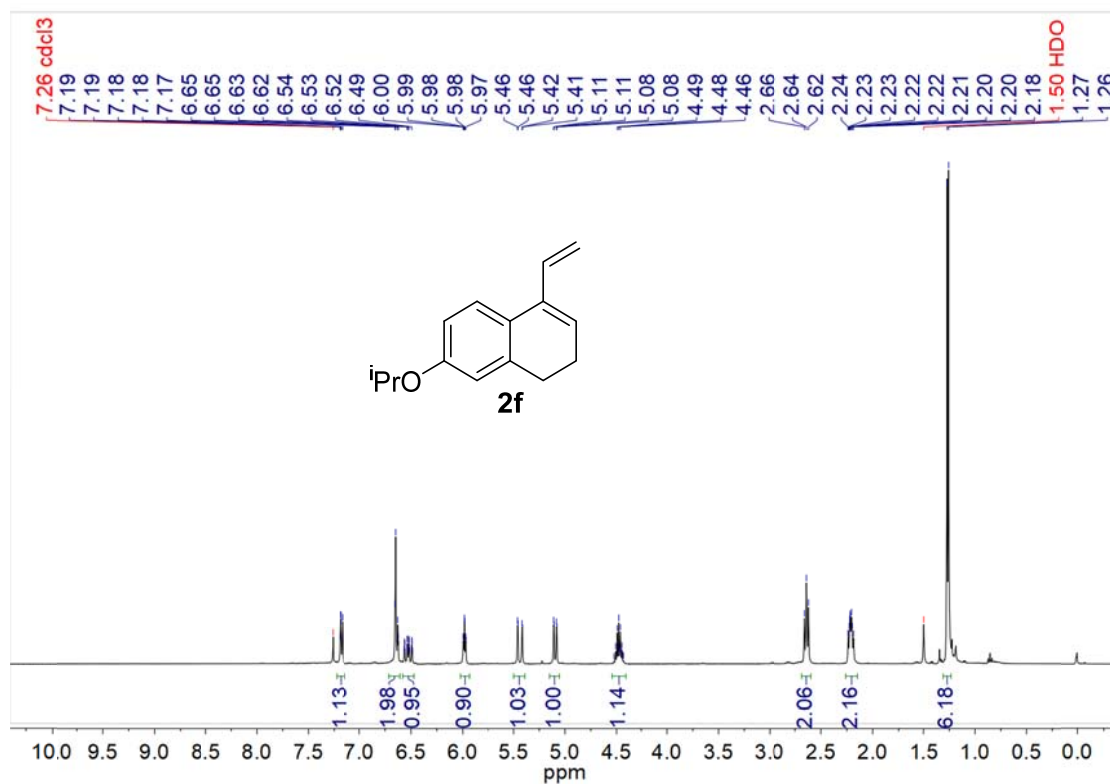

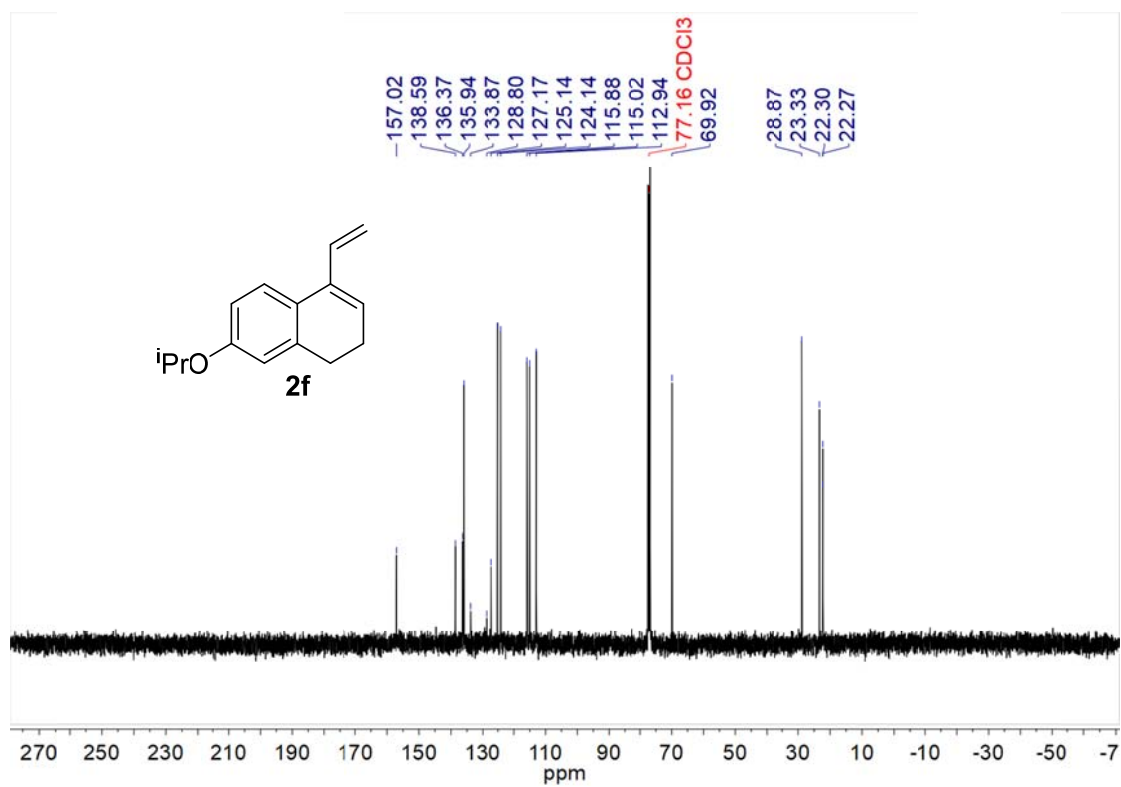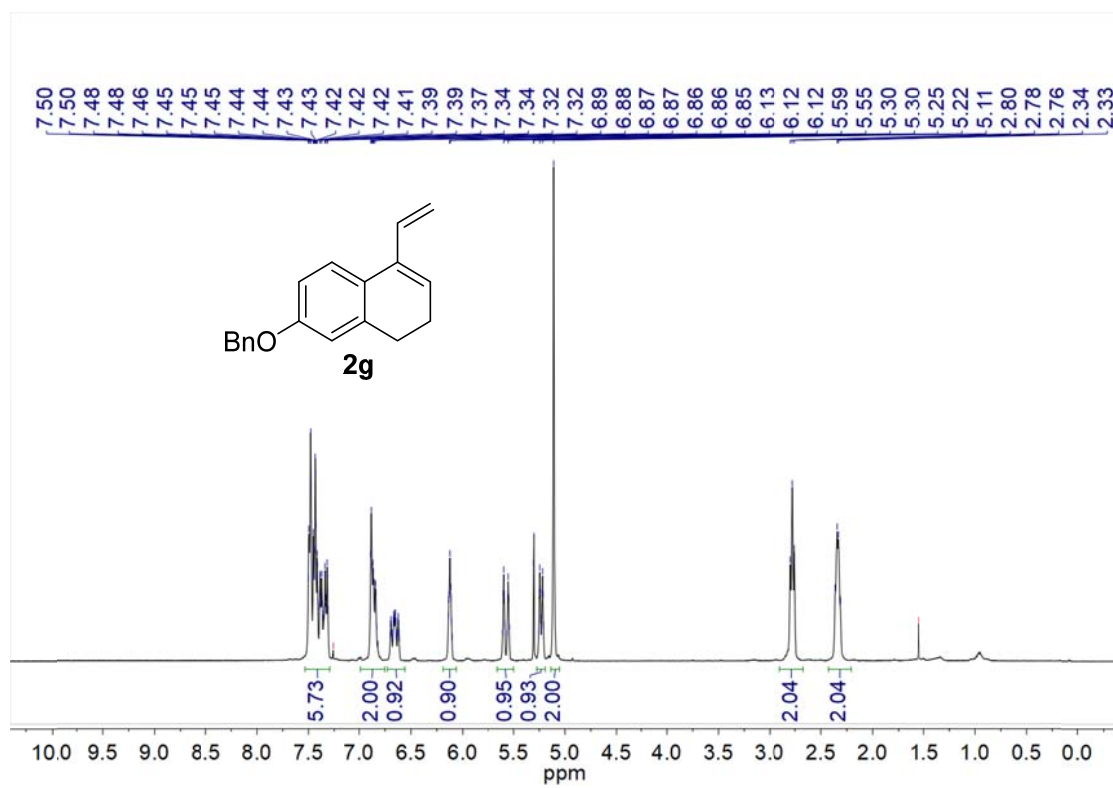

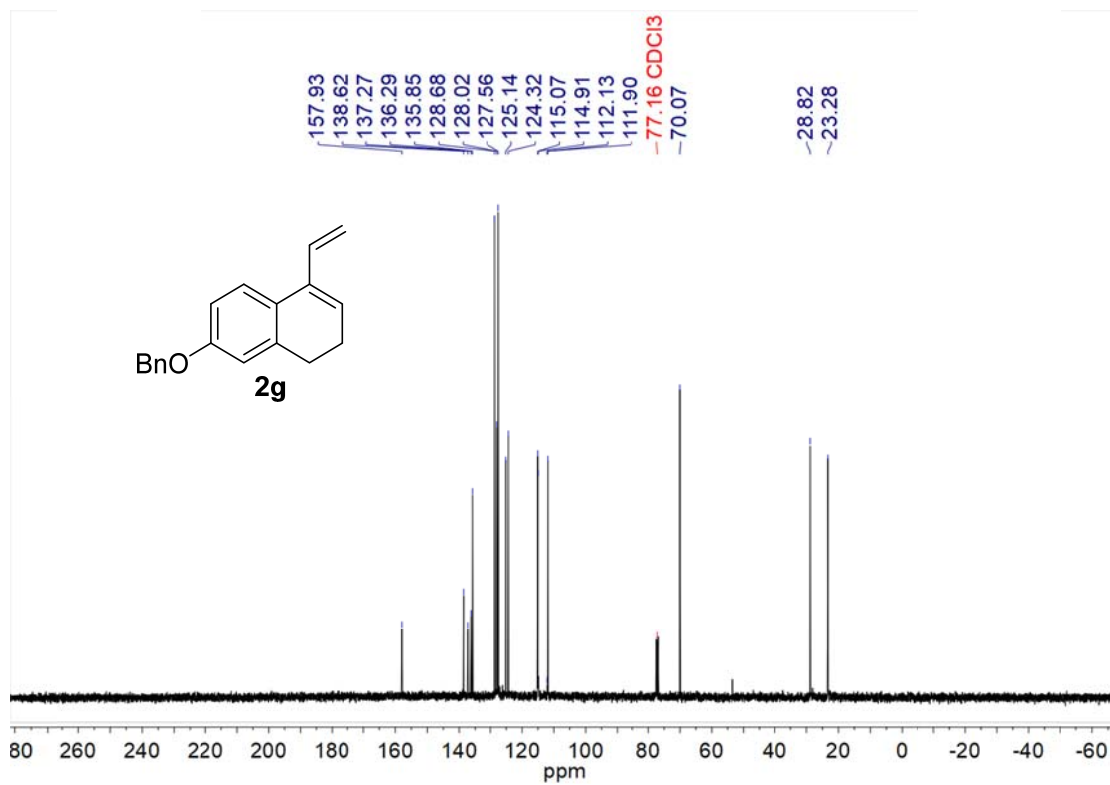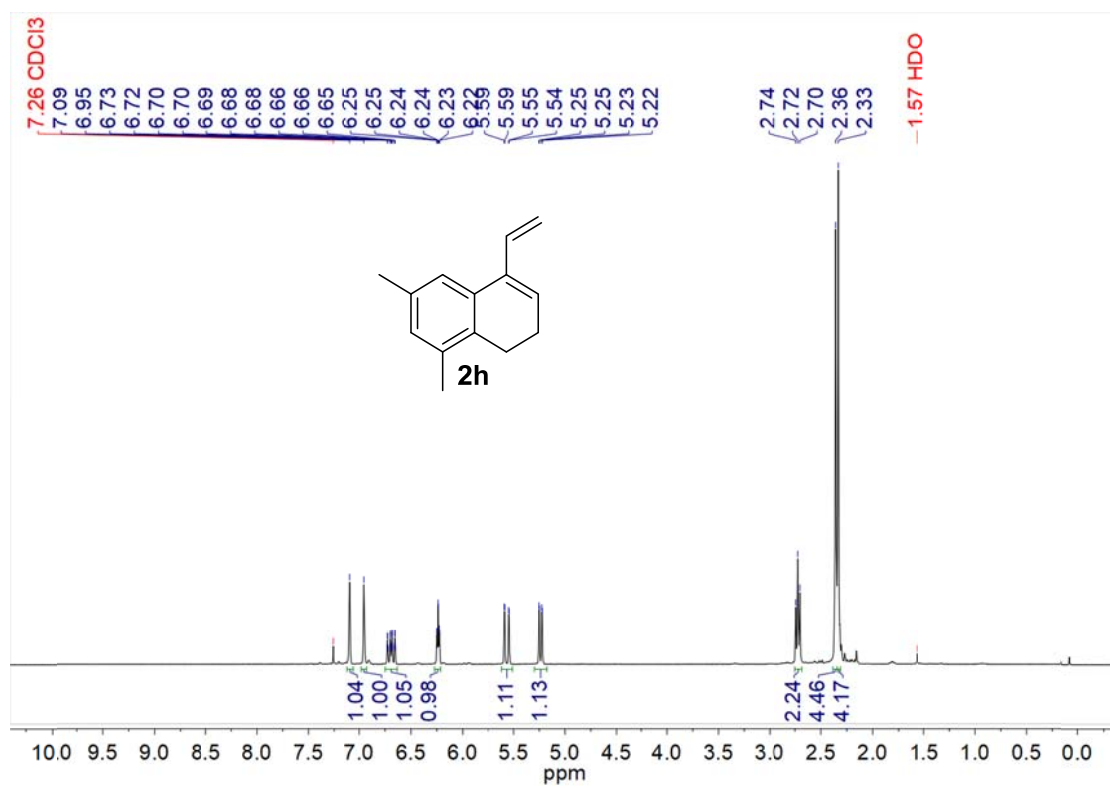

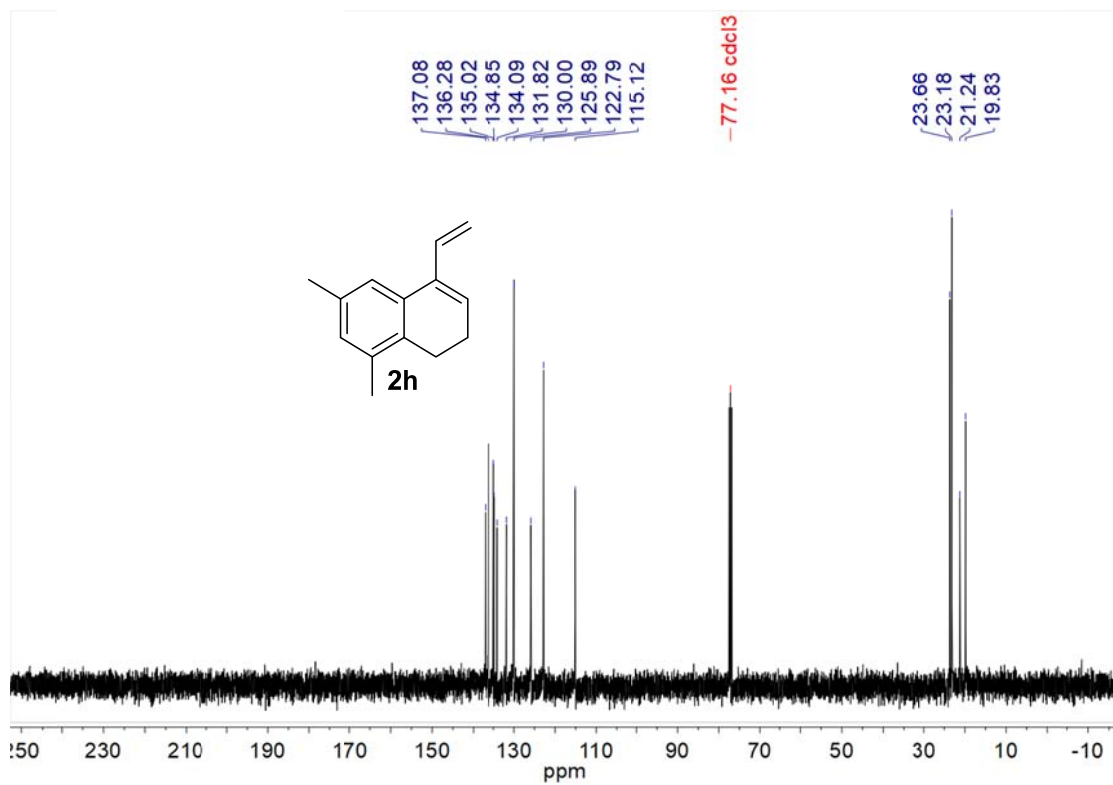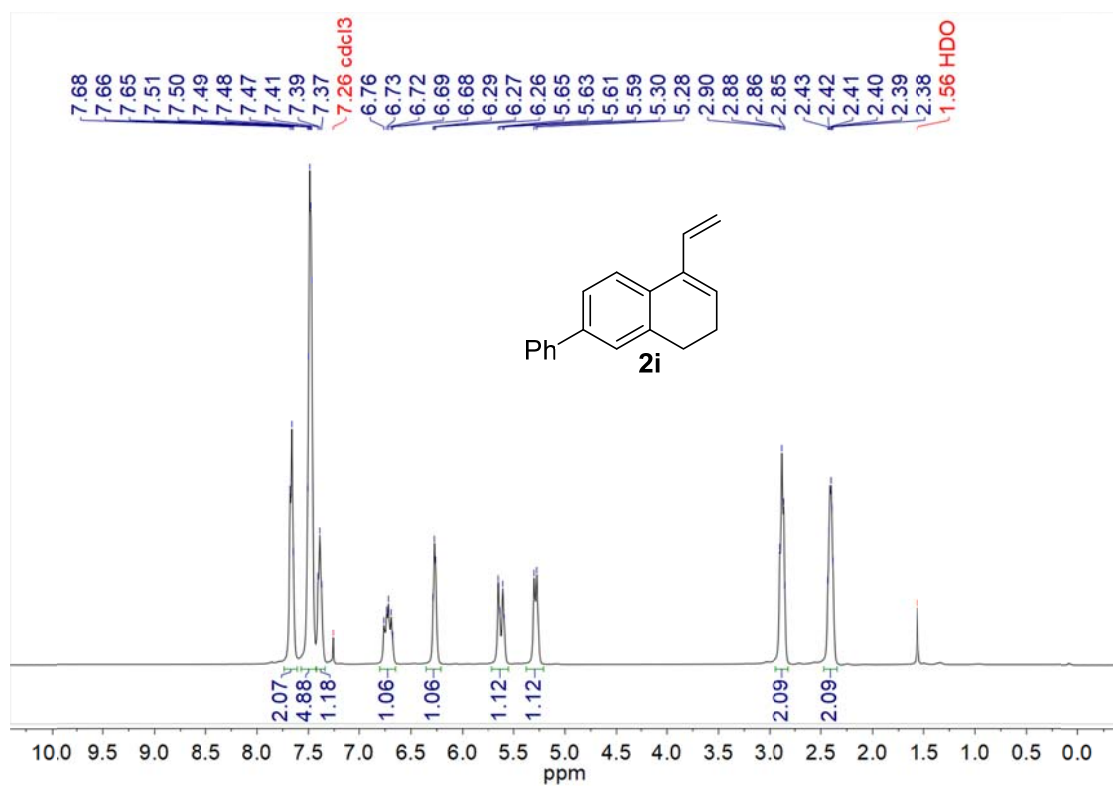

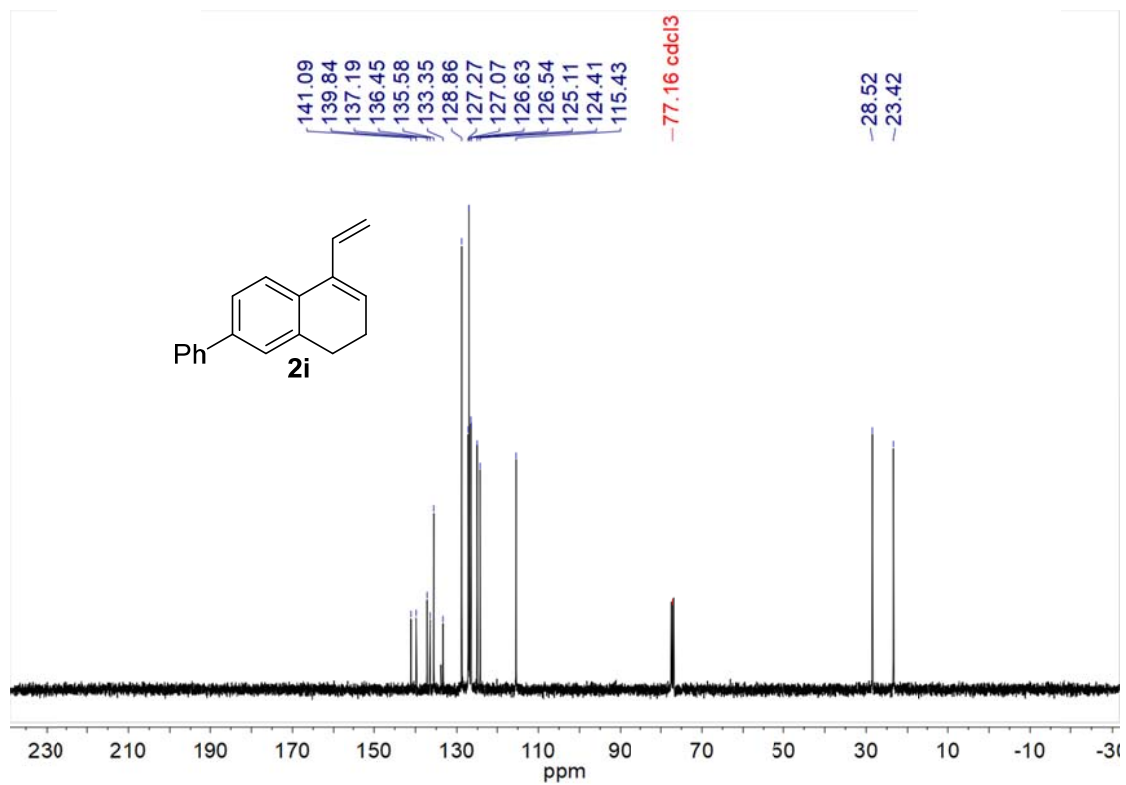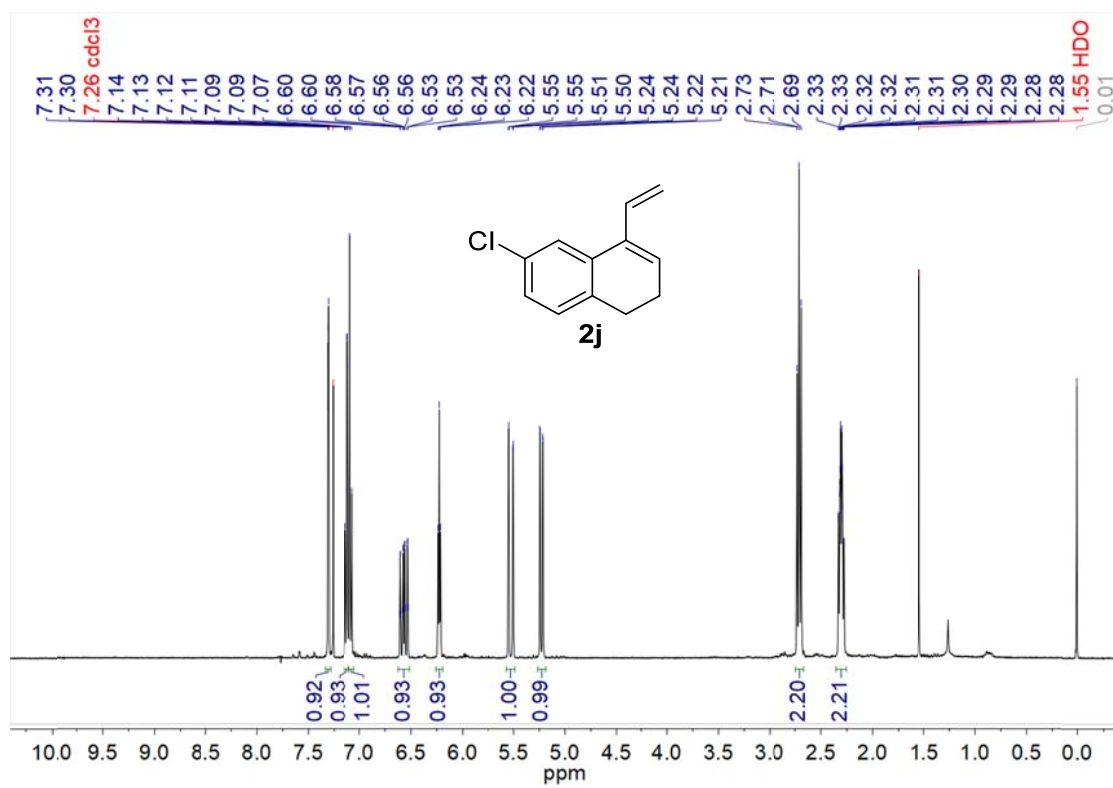

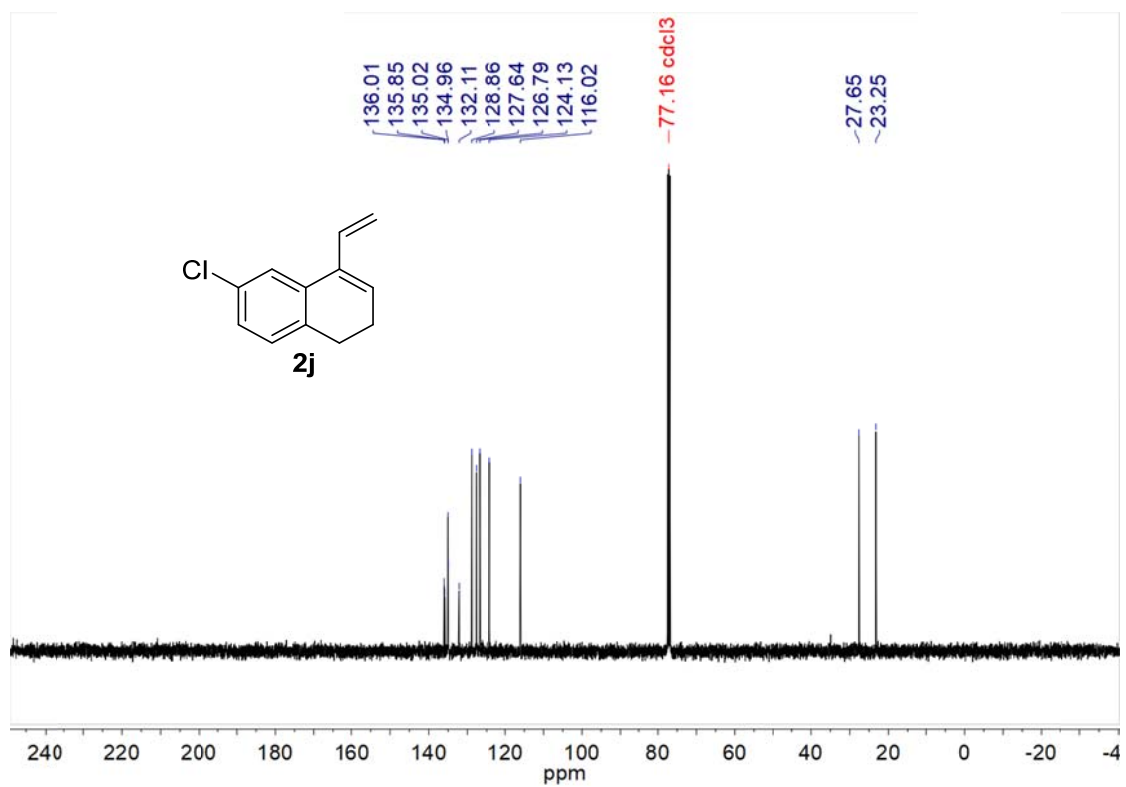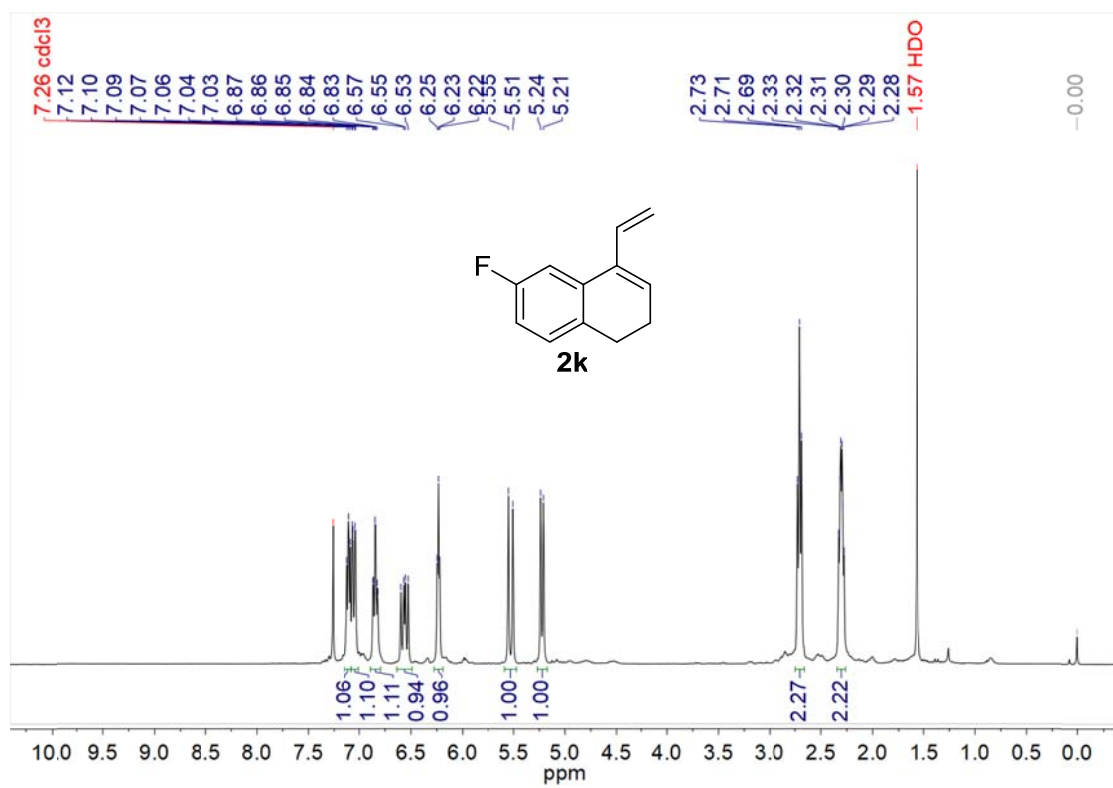

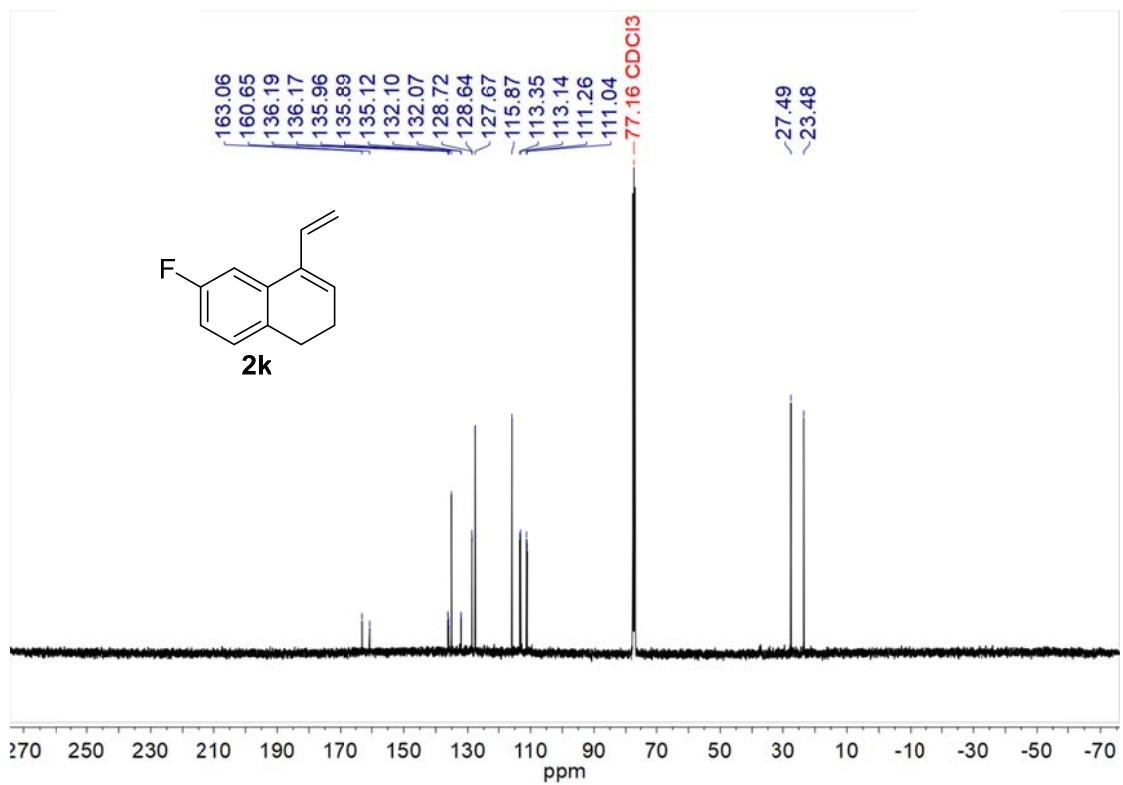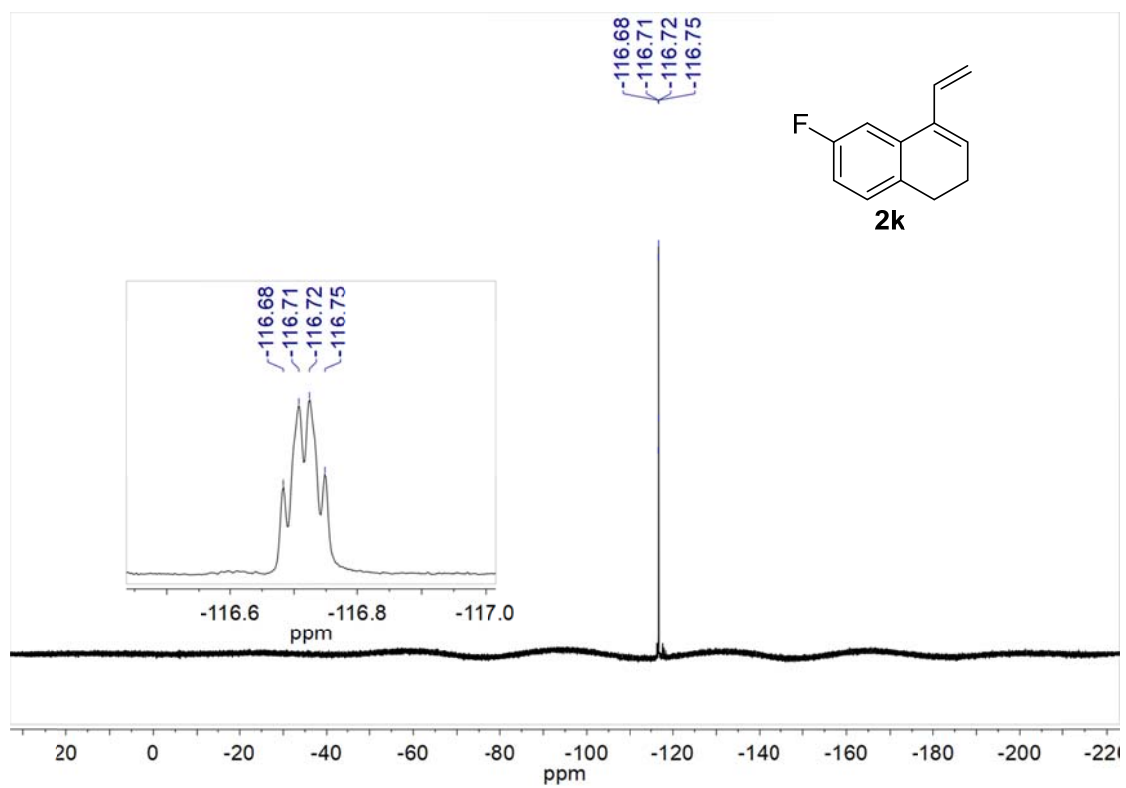



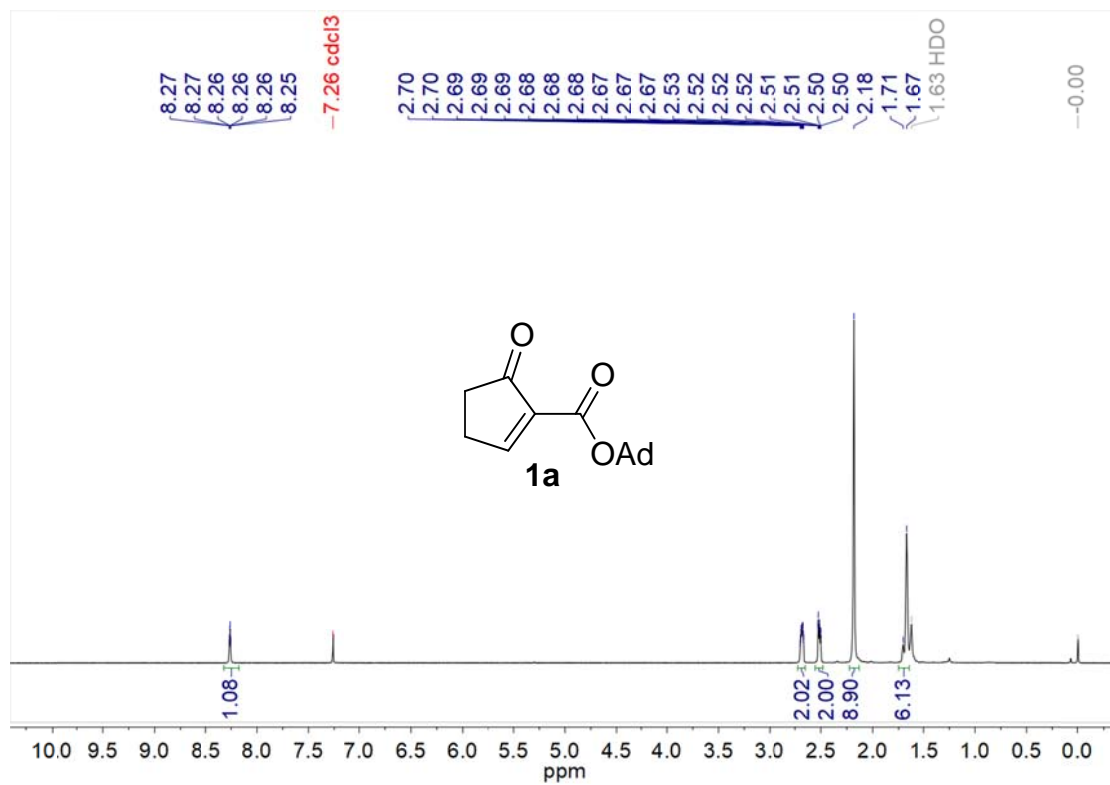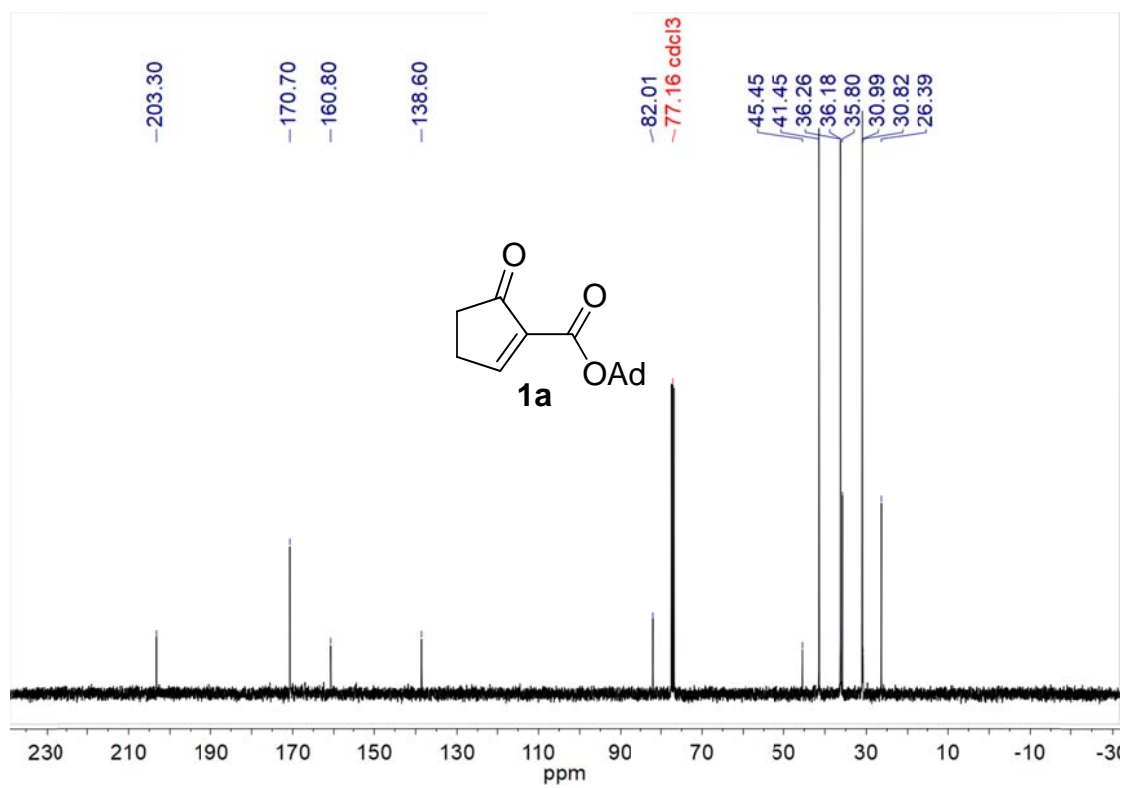

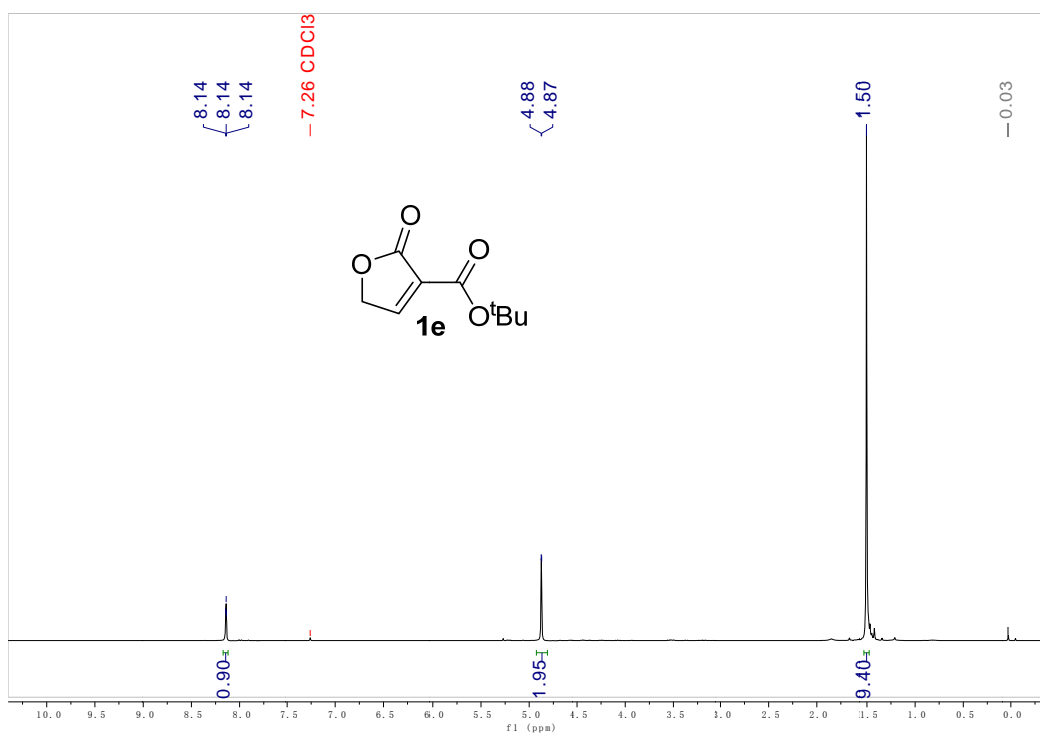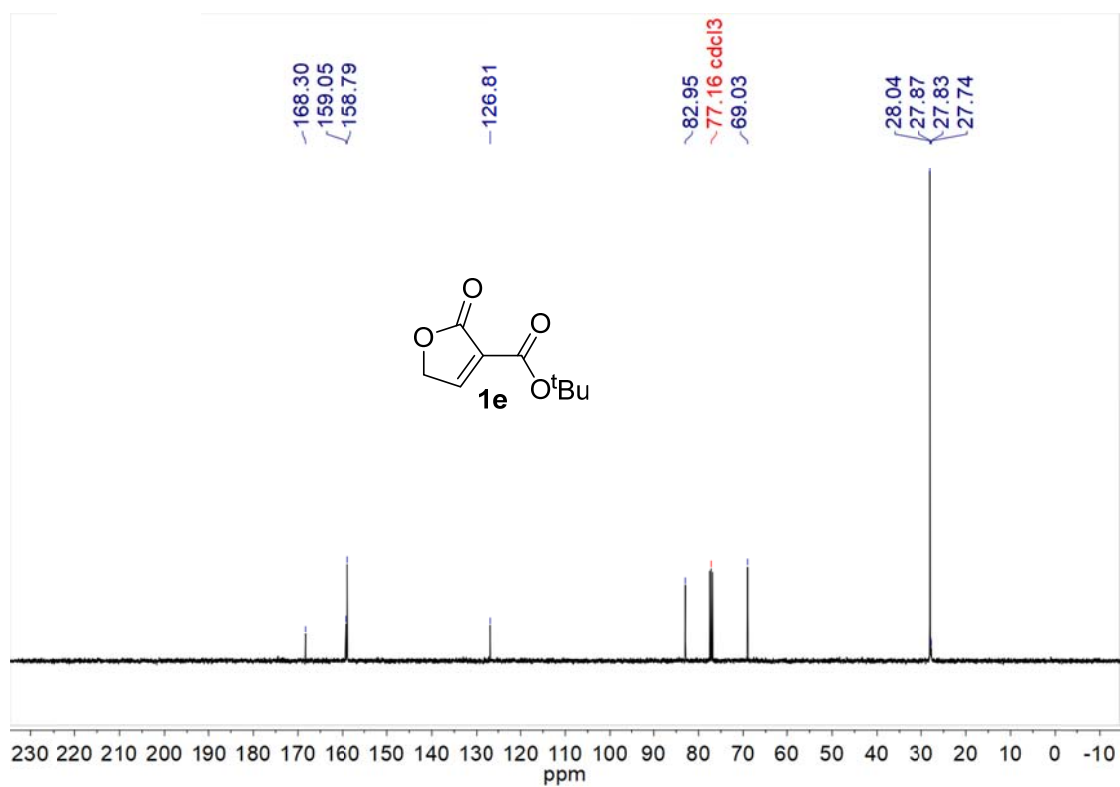

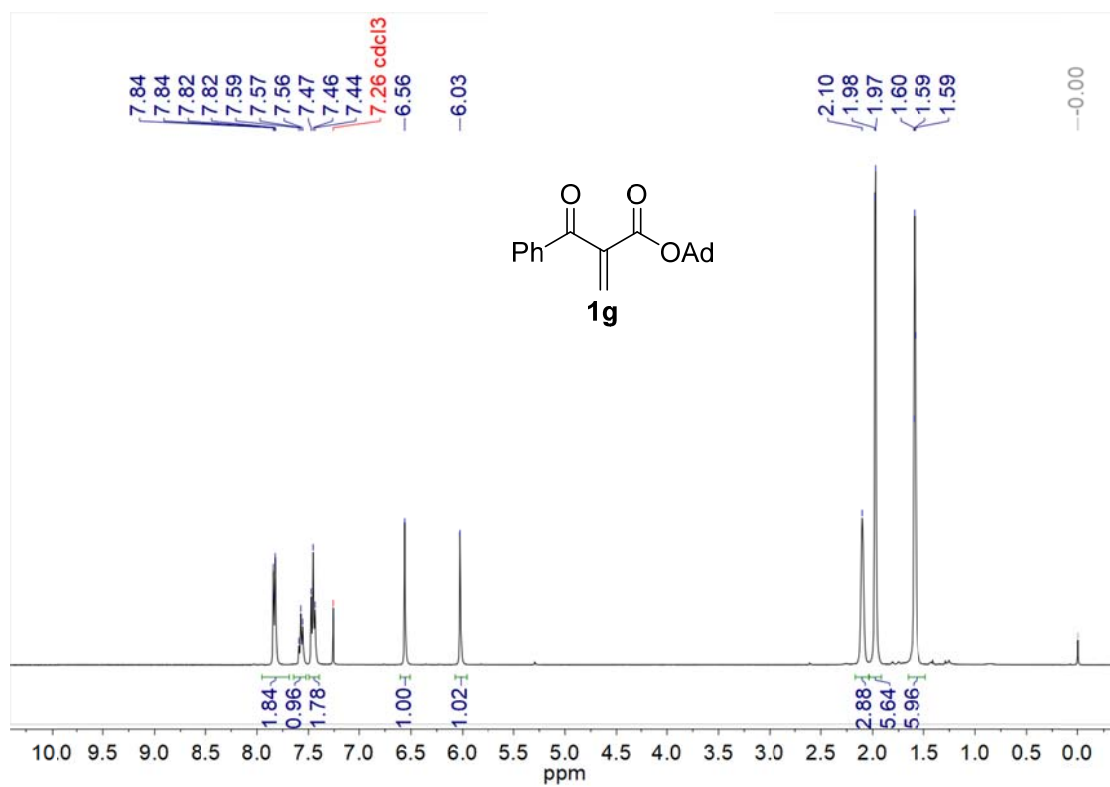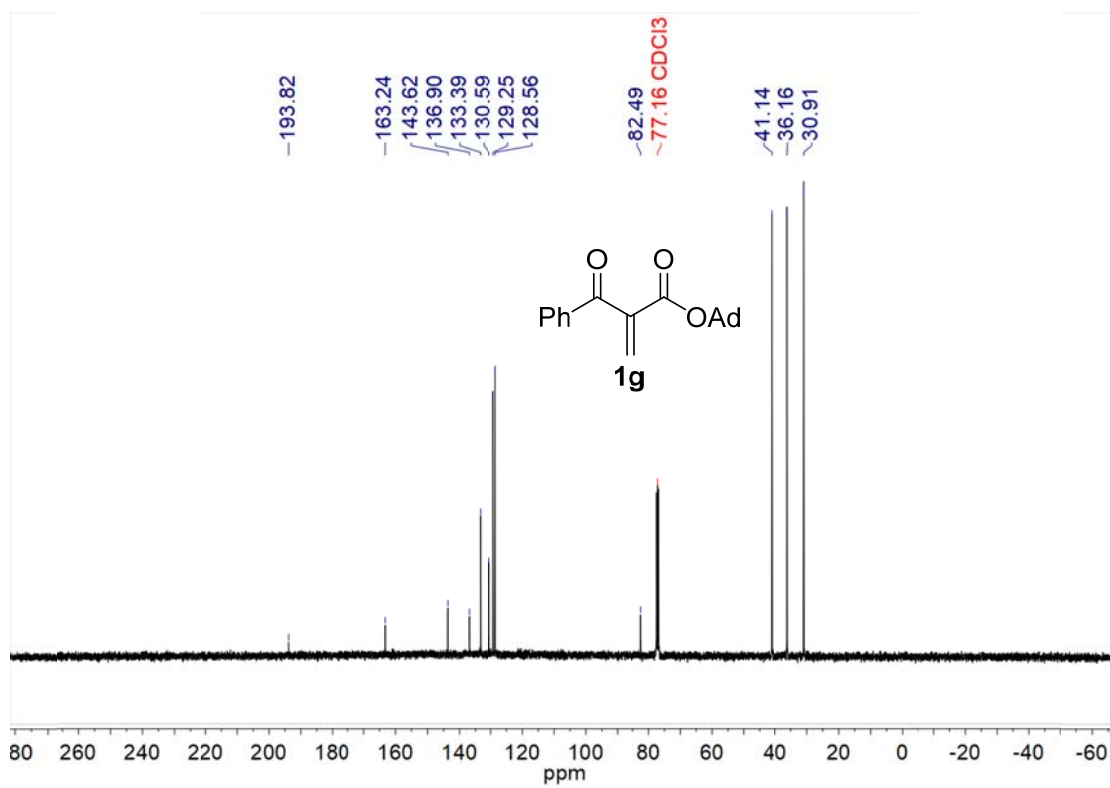

3a

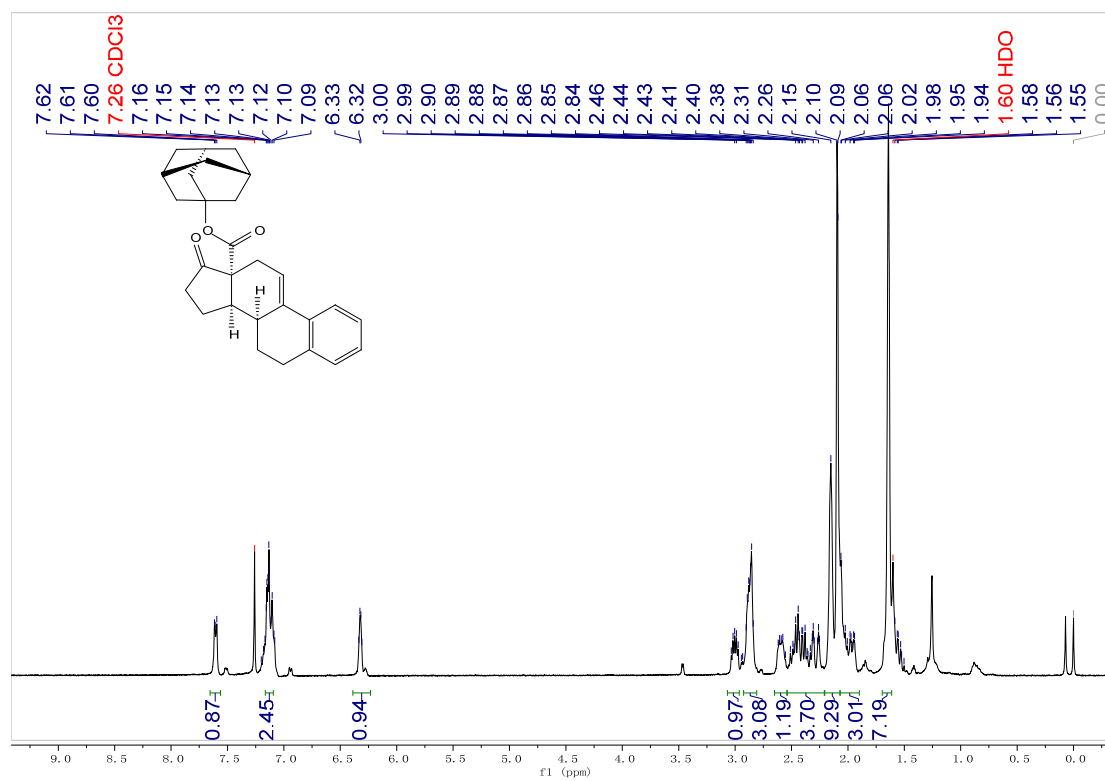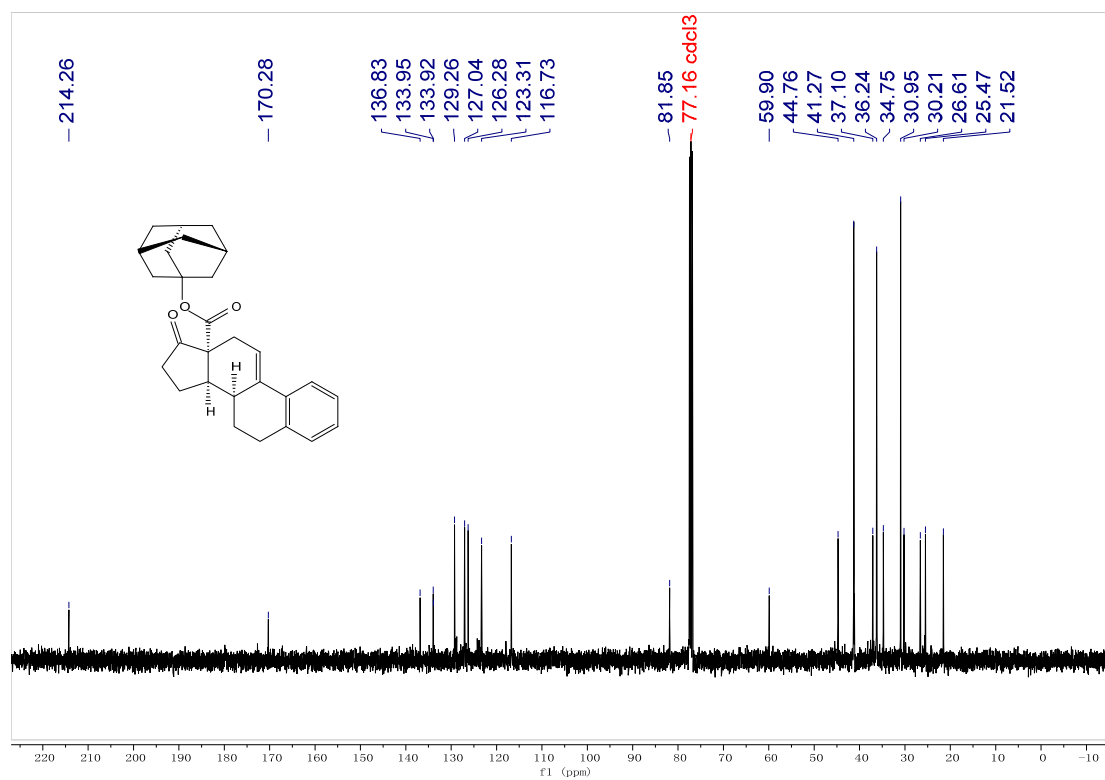

3b

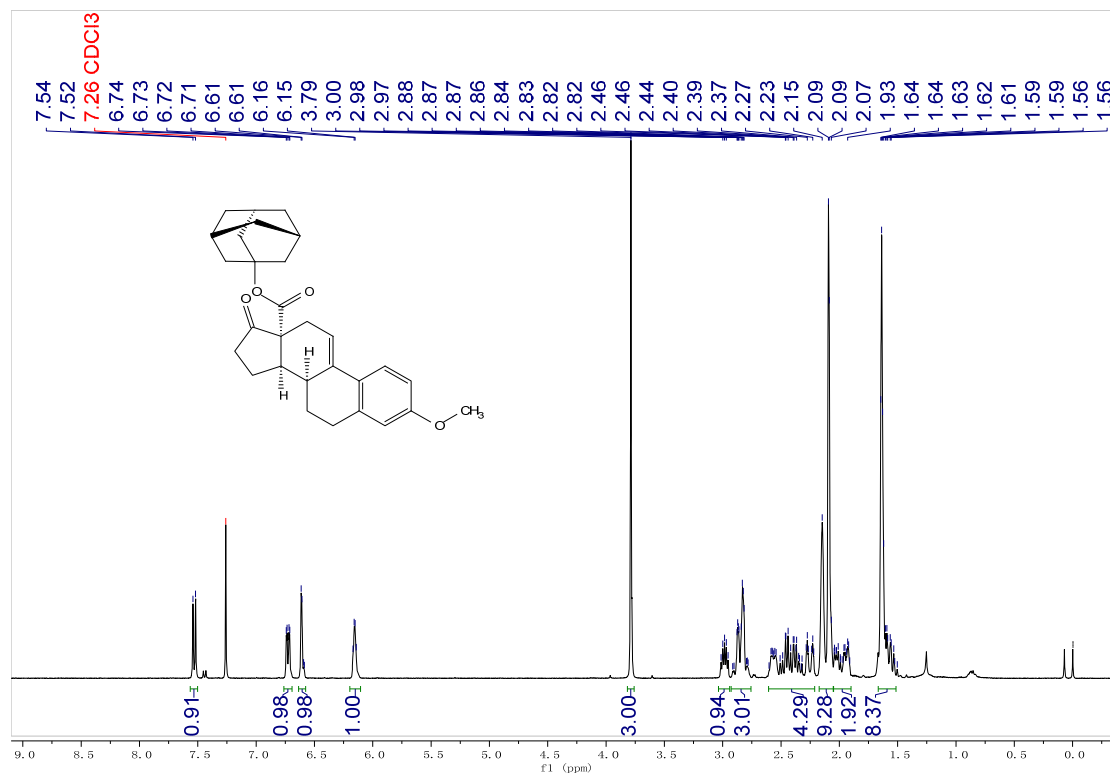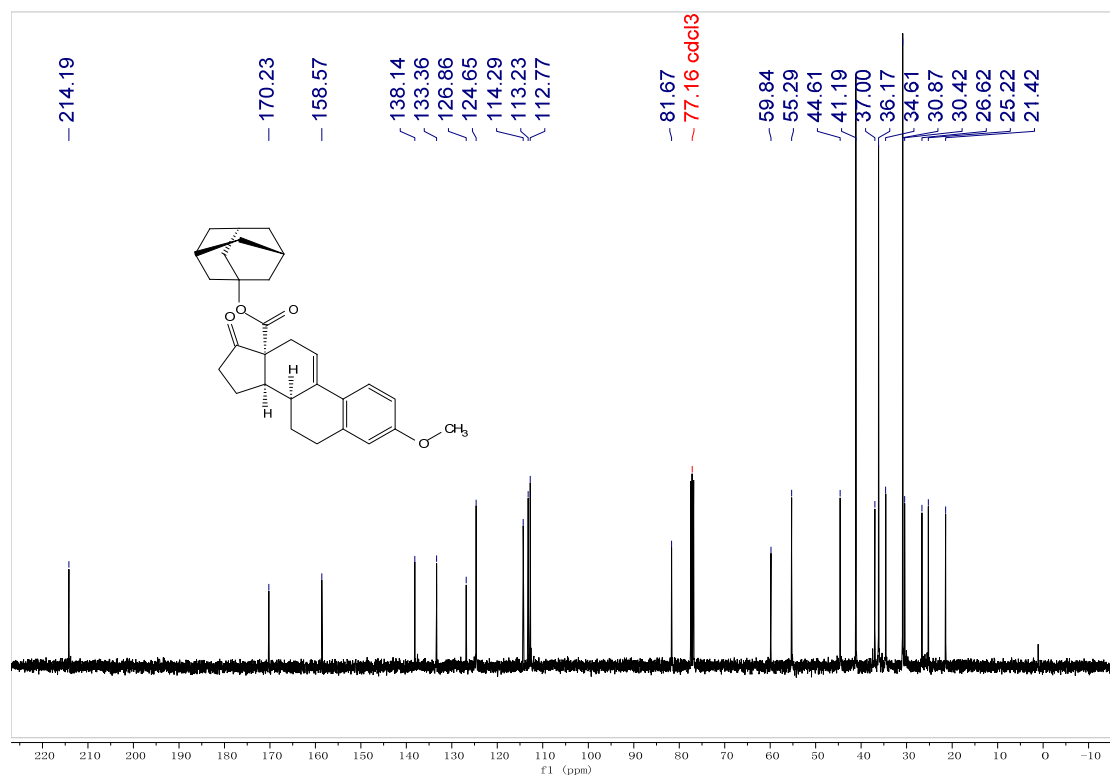

3c

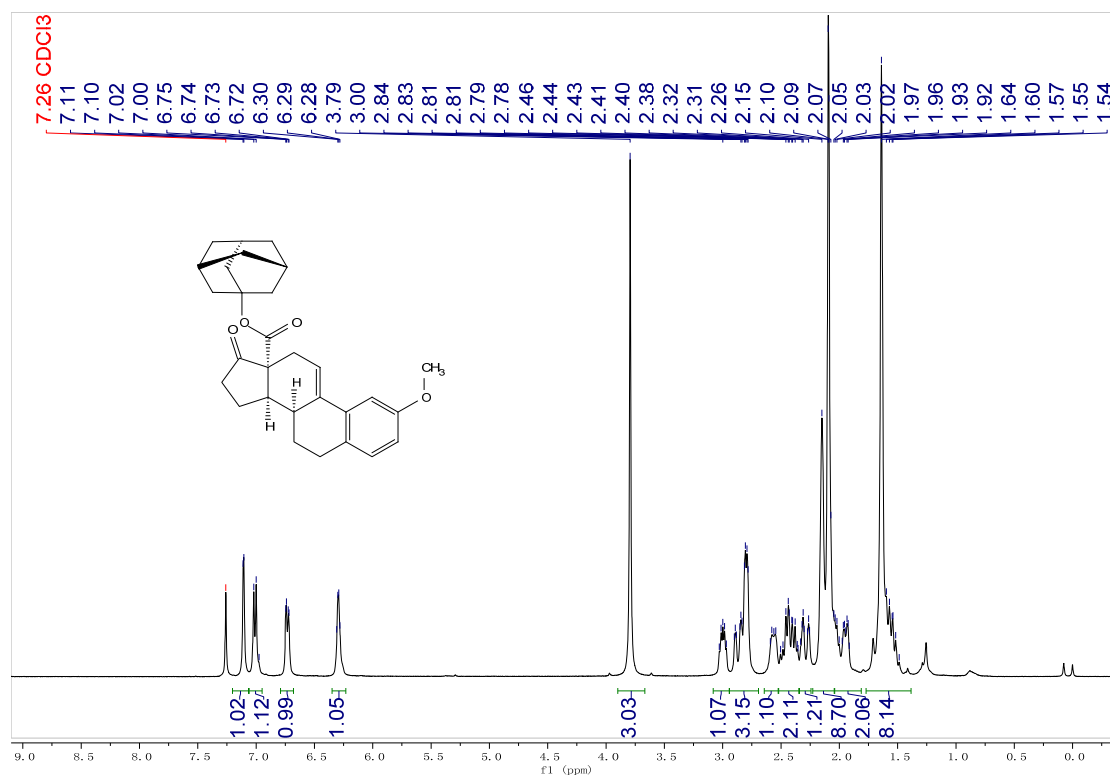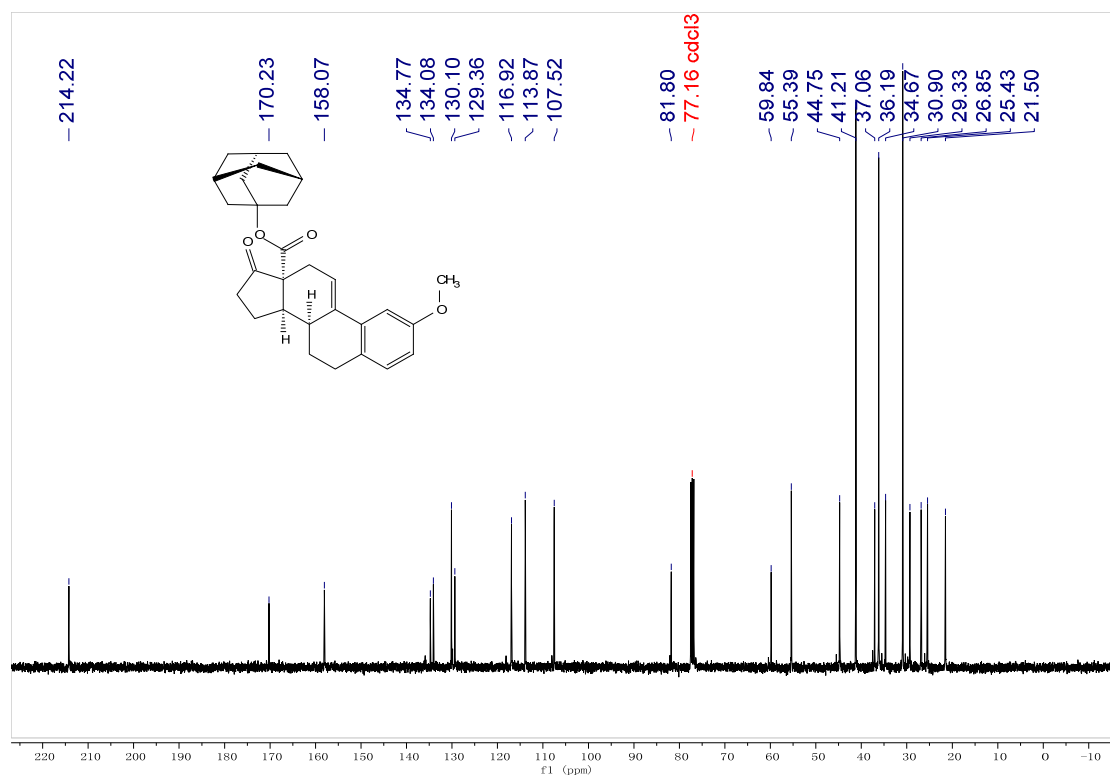

3d

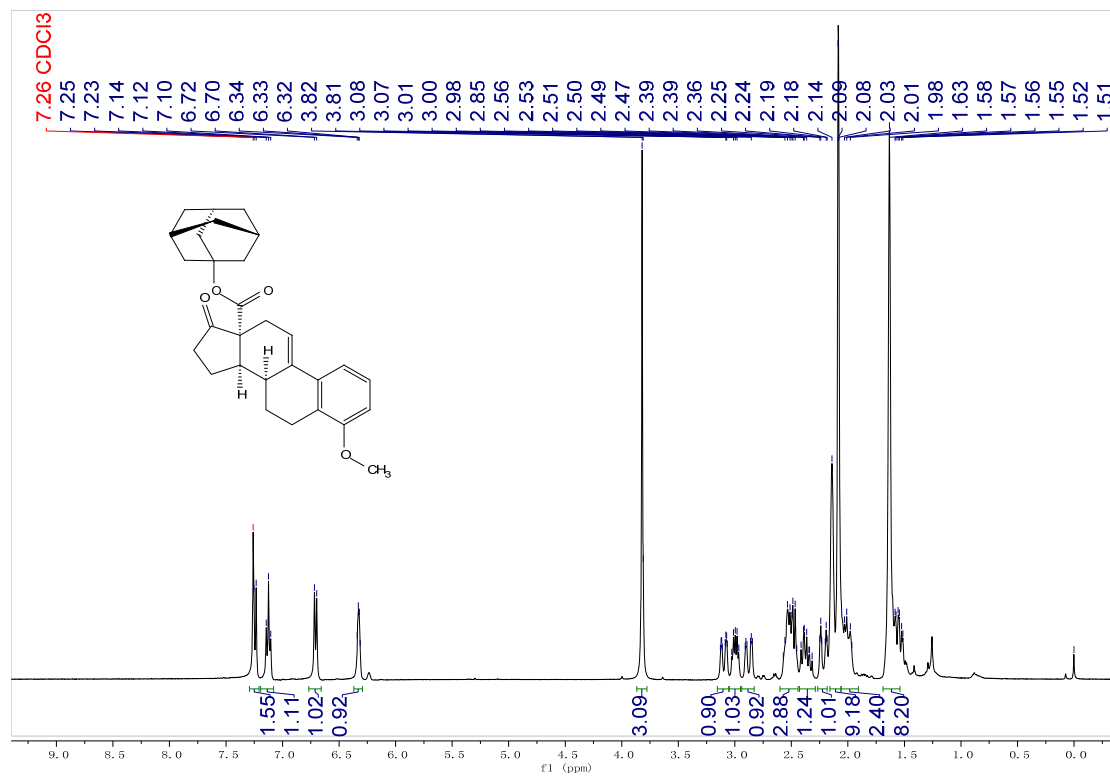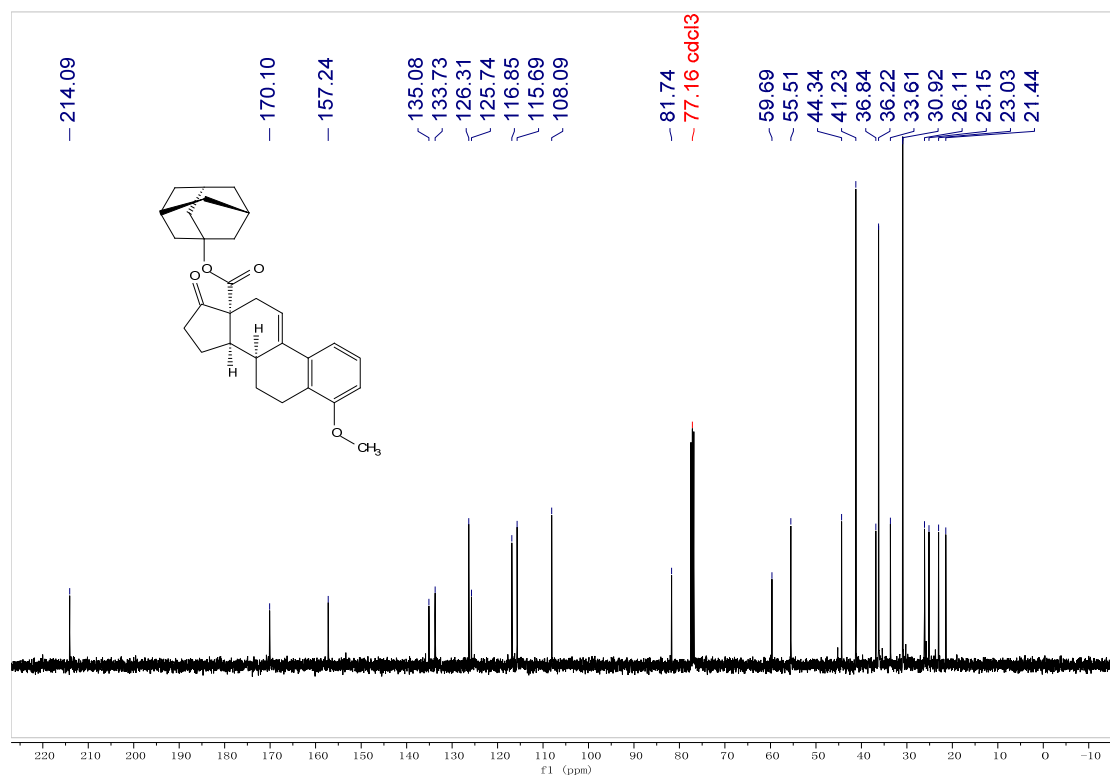

3e

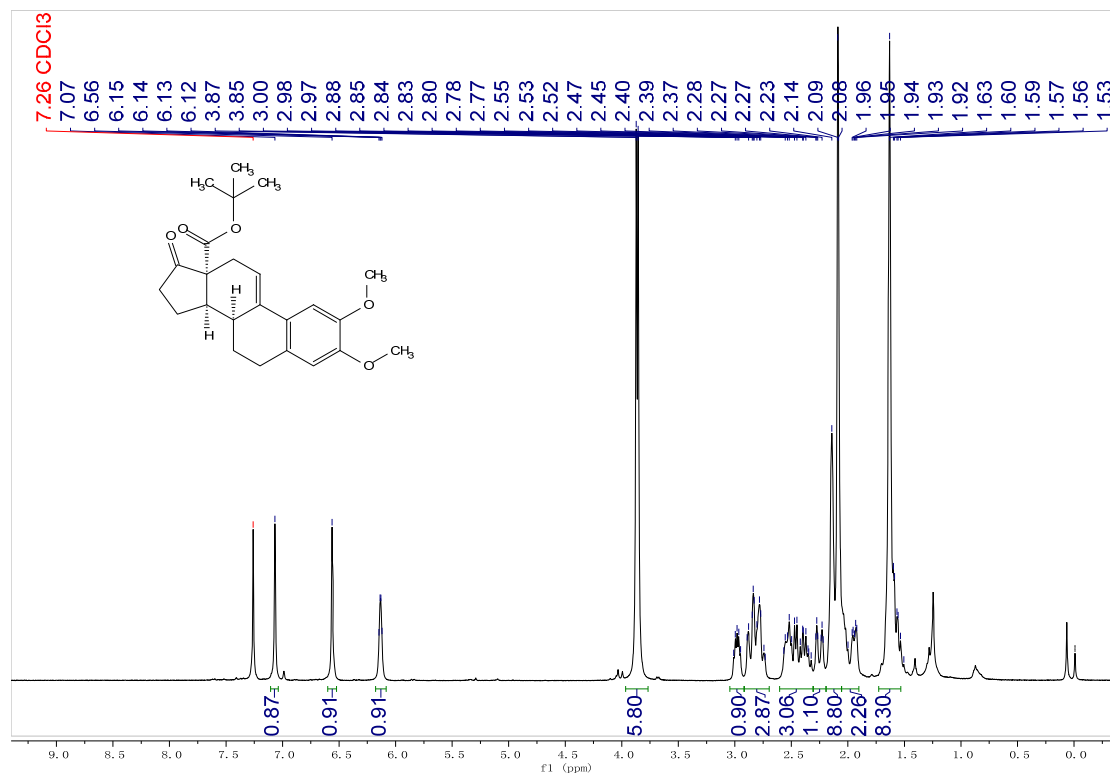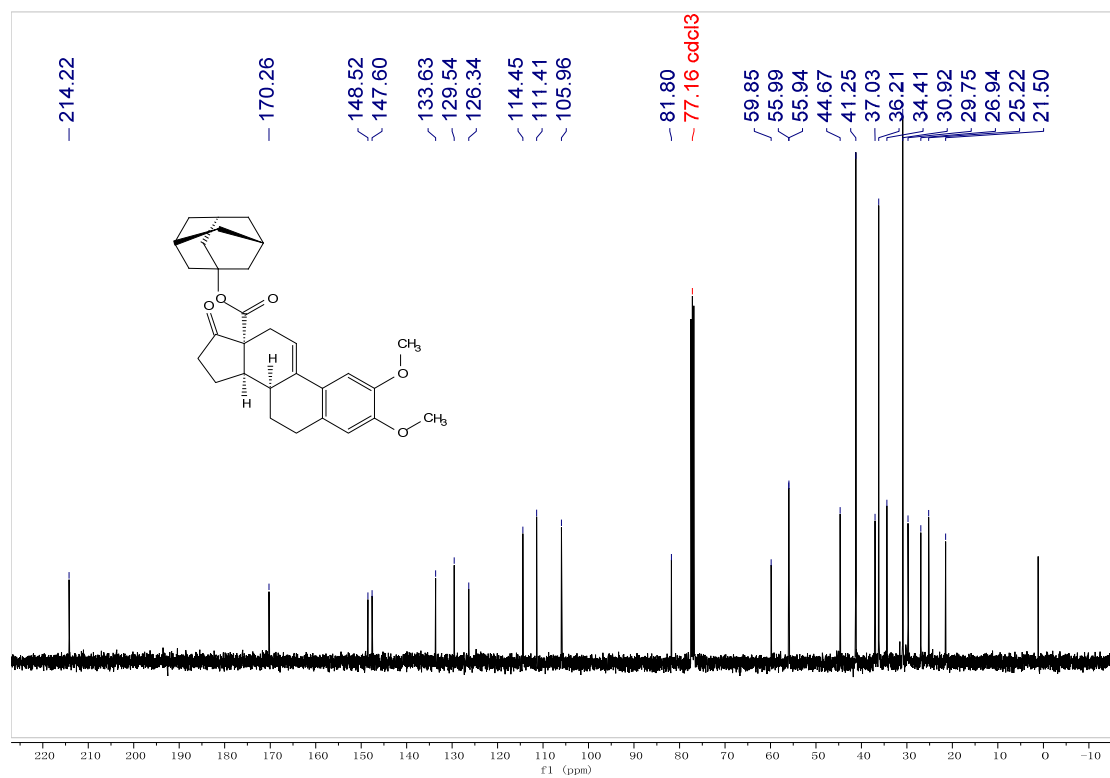



3f

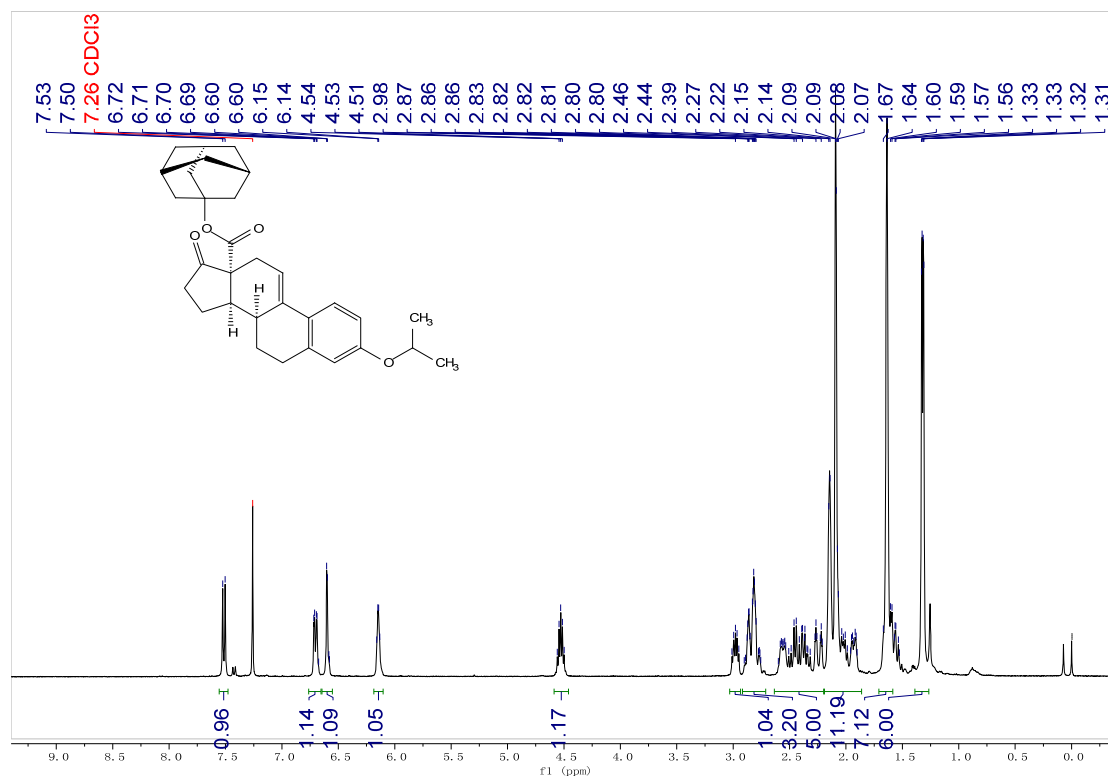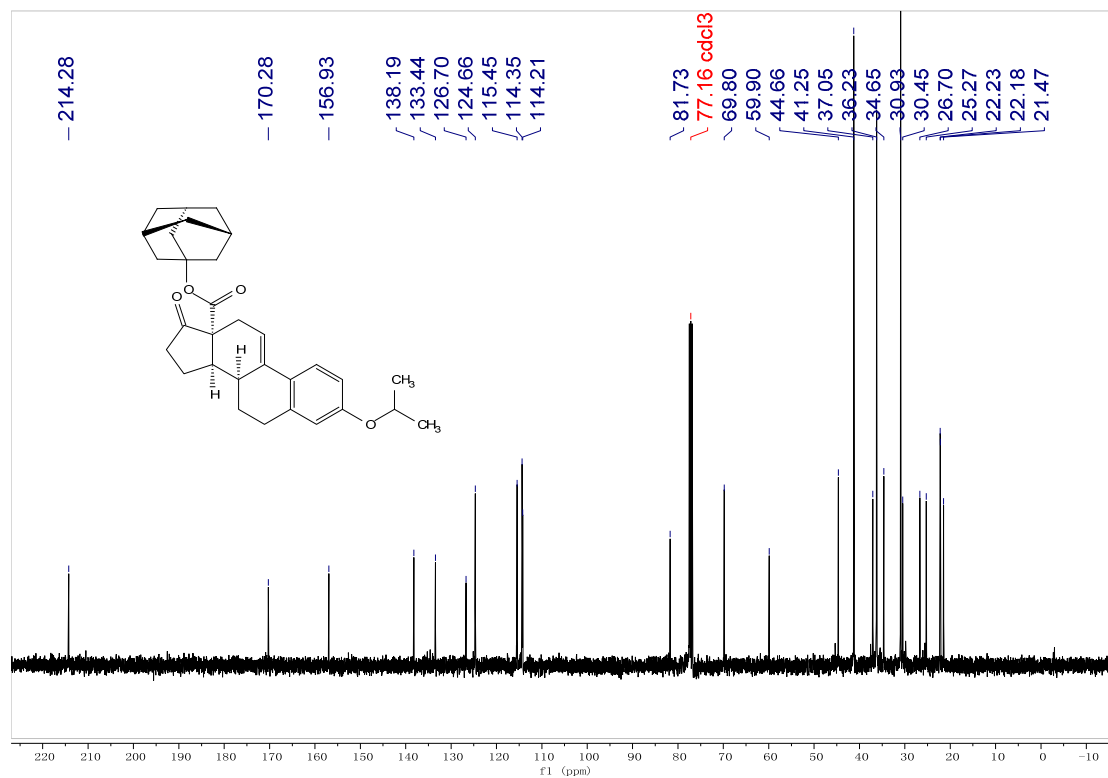

3g

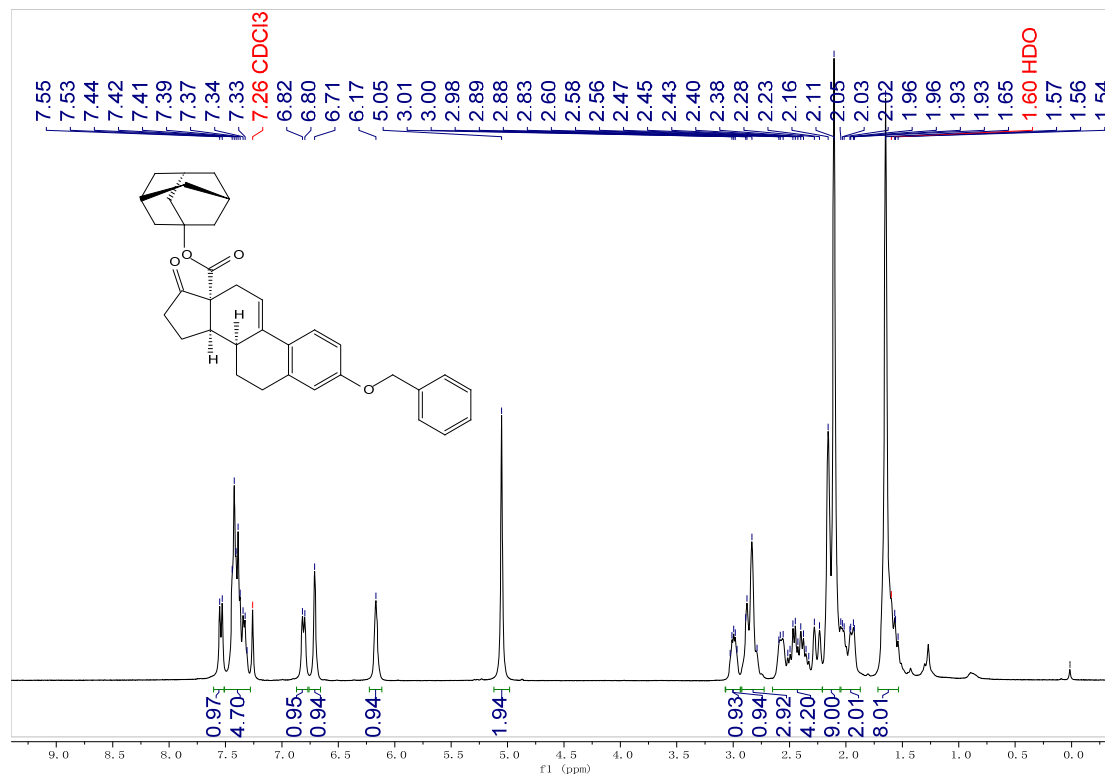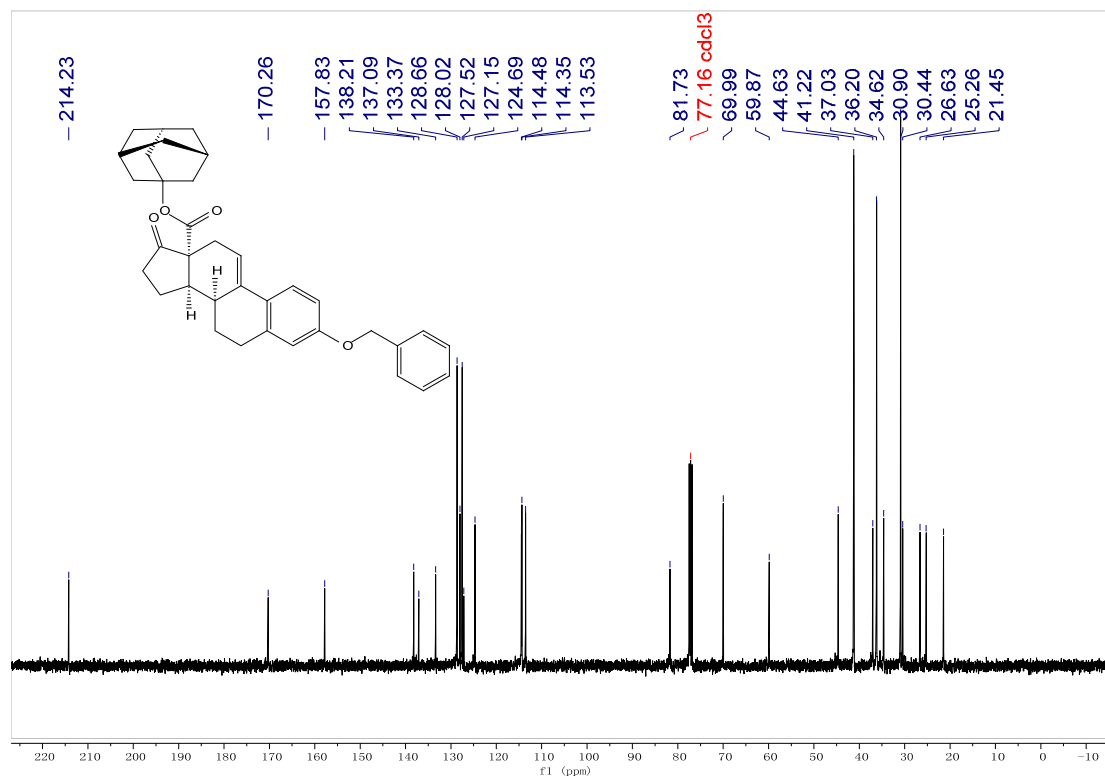

3h

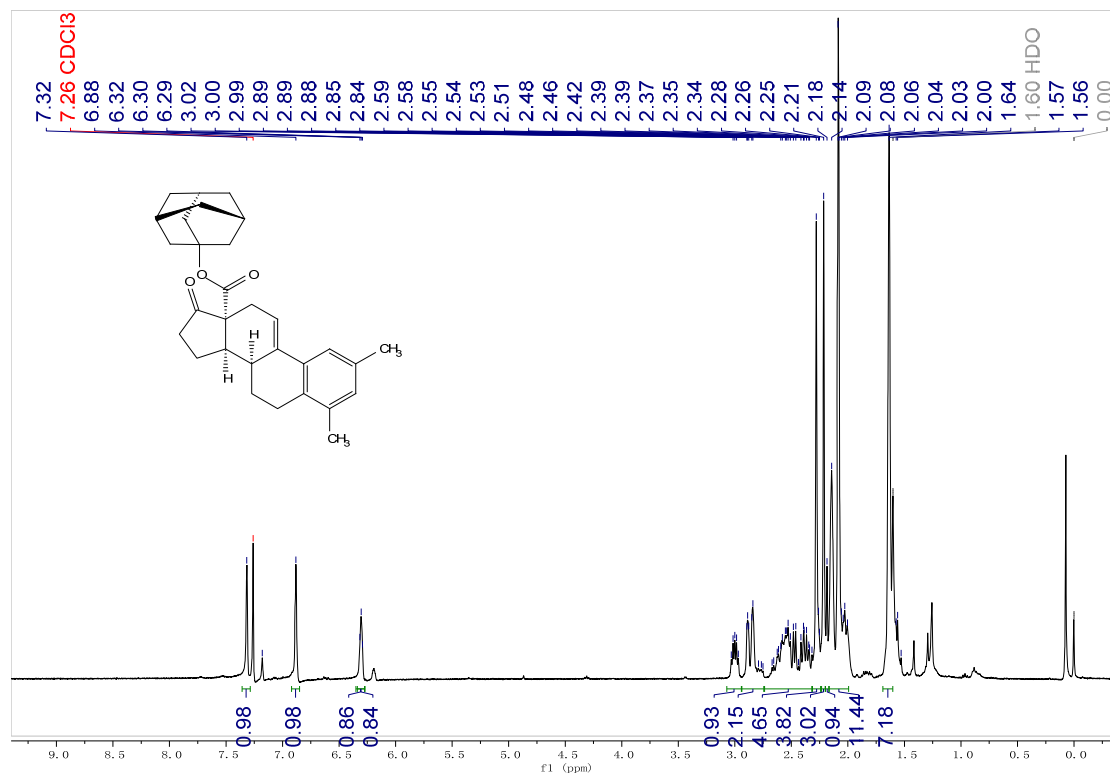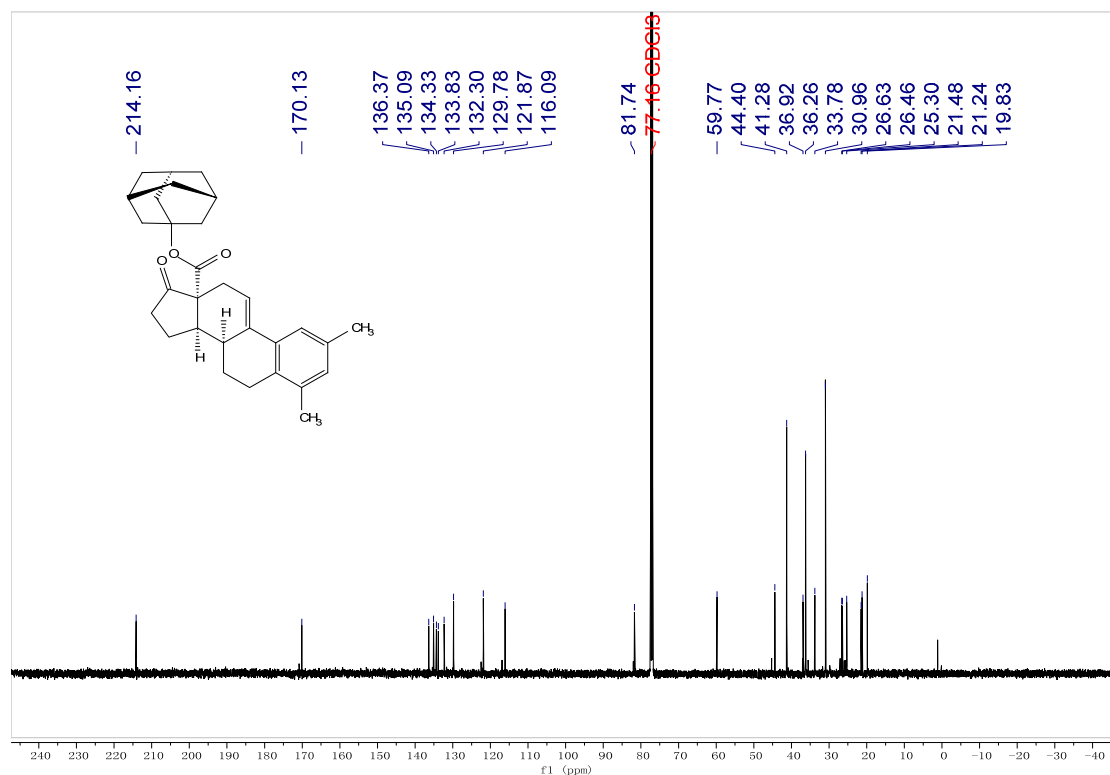

3i

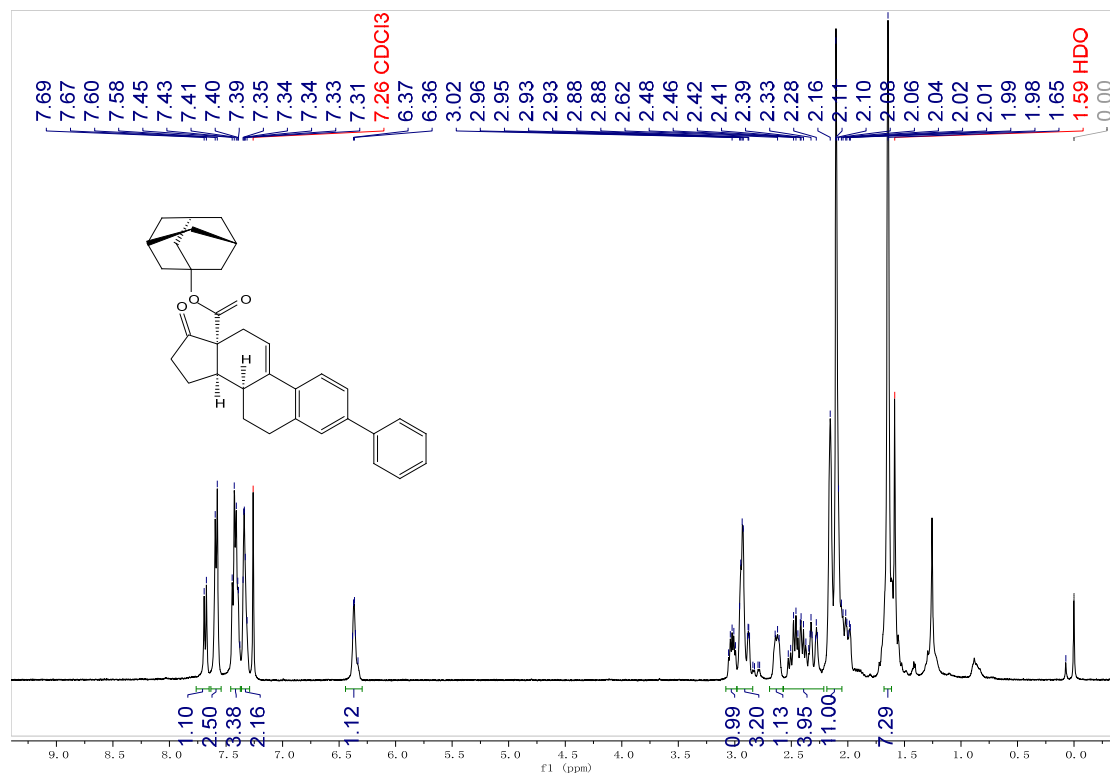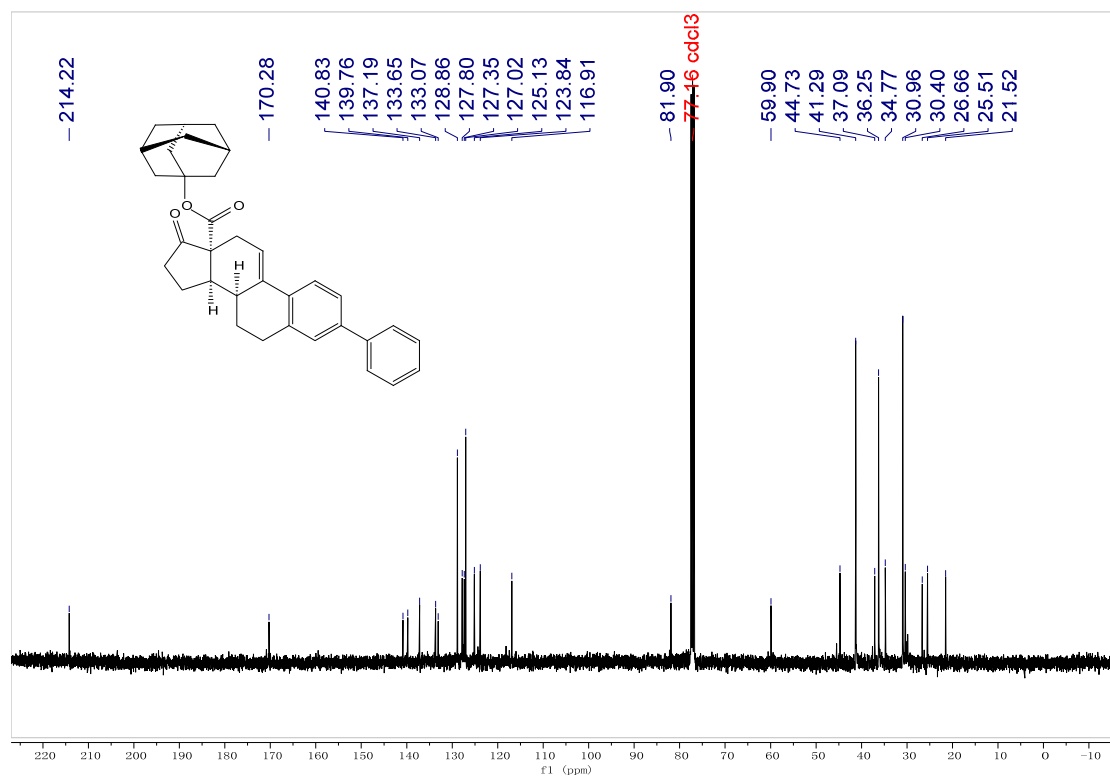

3j

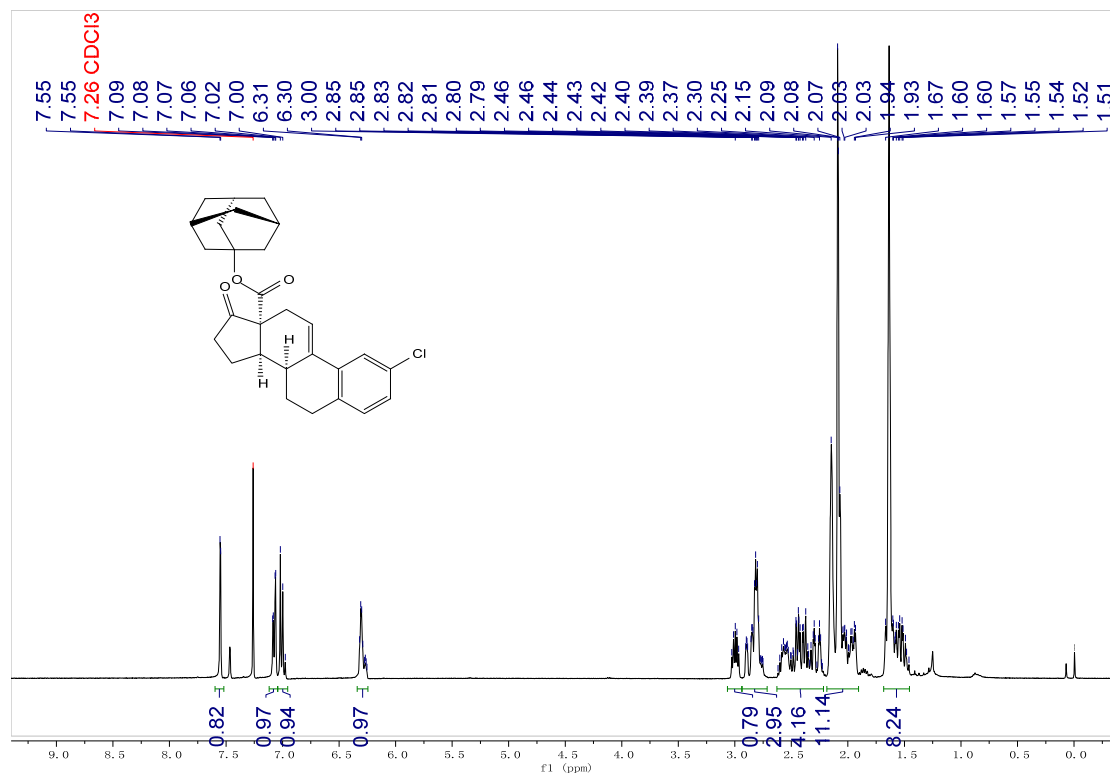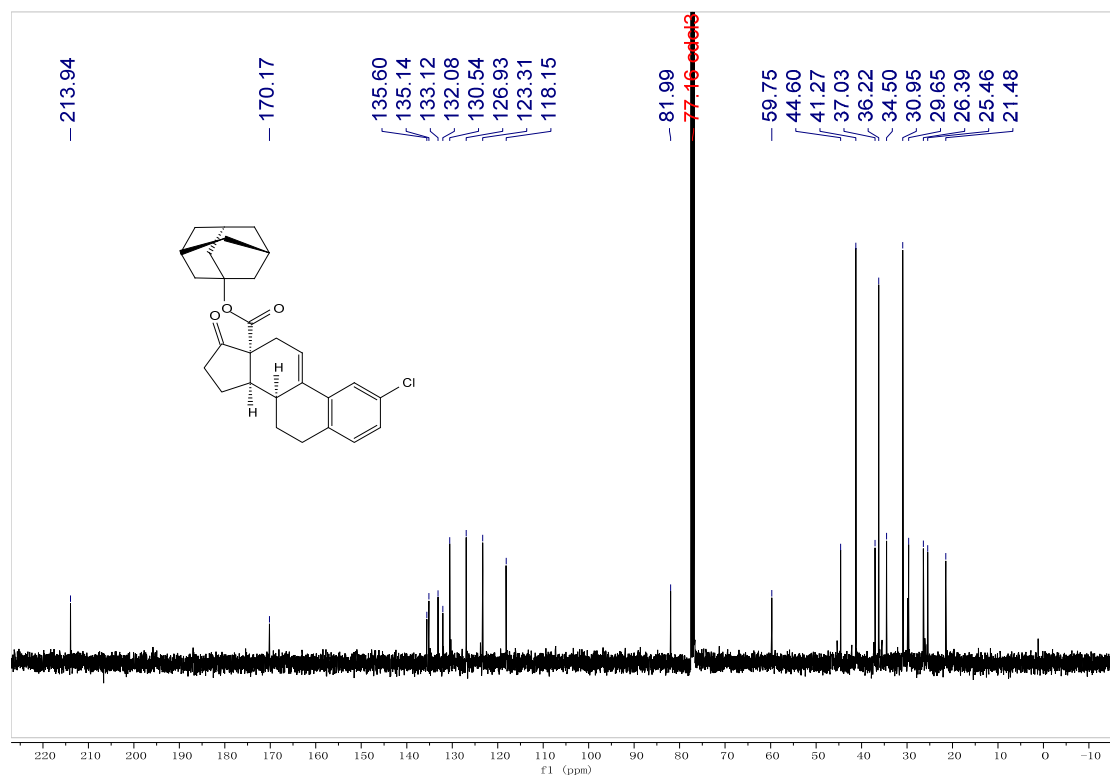

3k

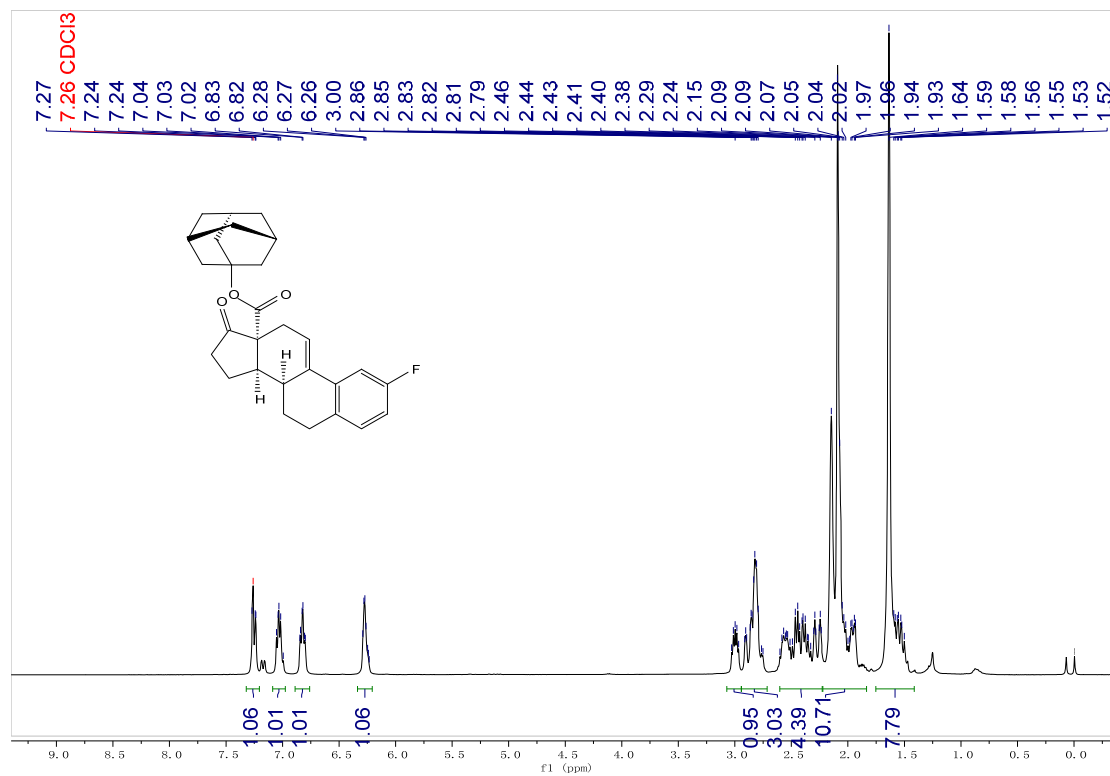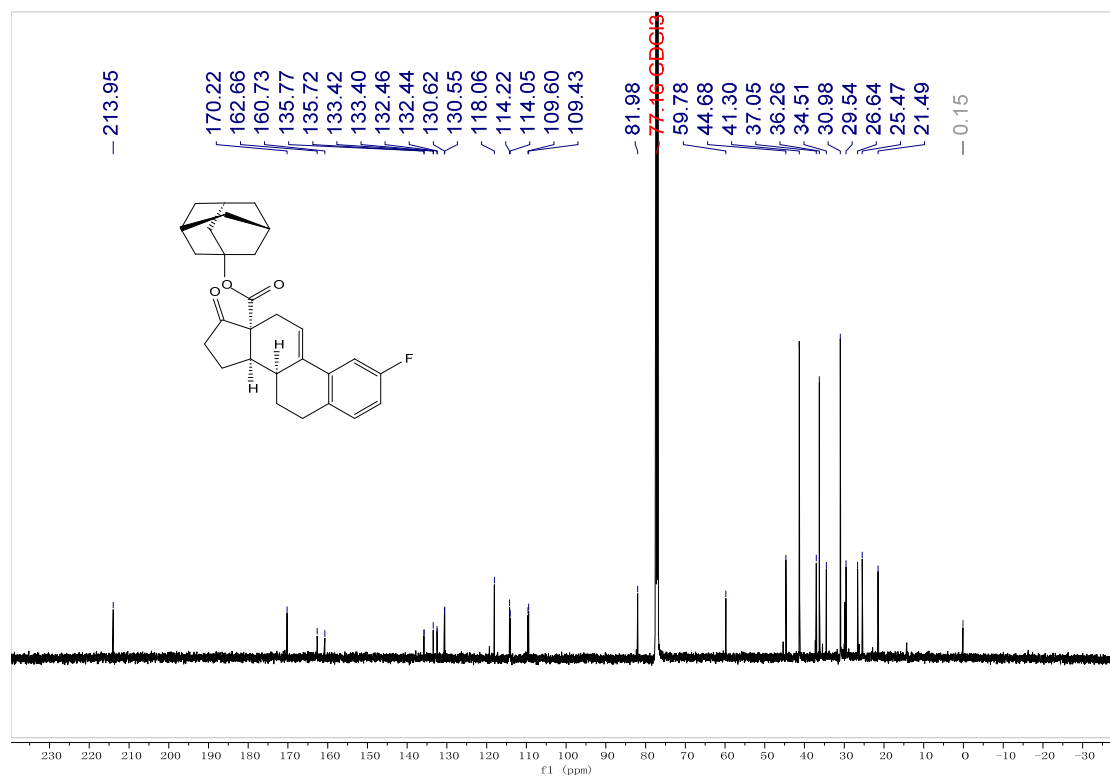

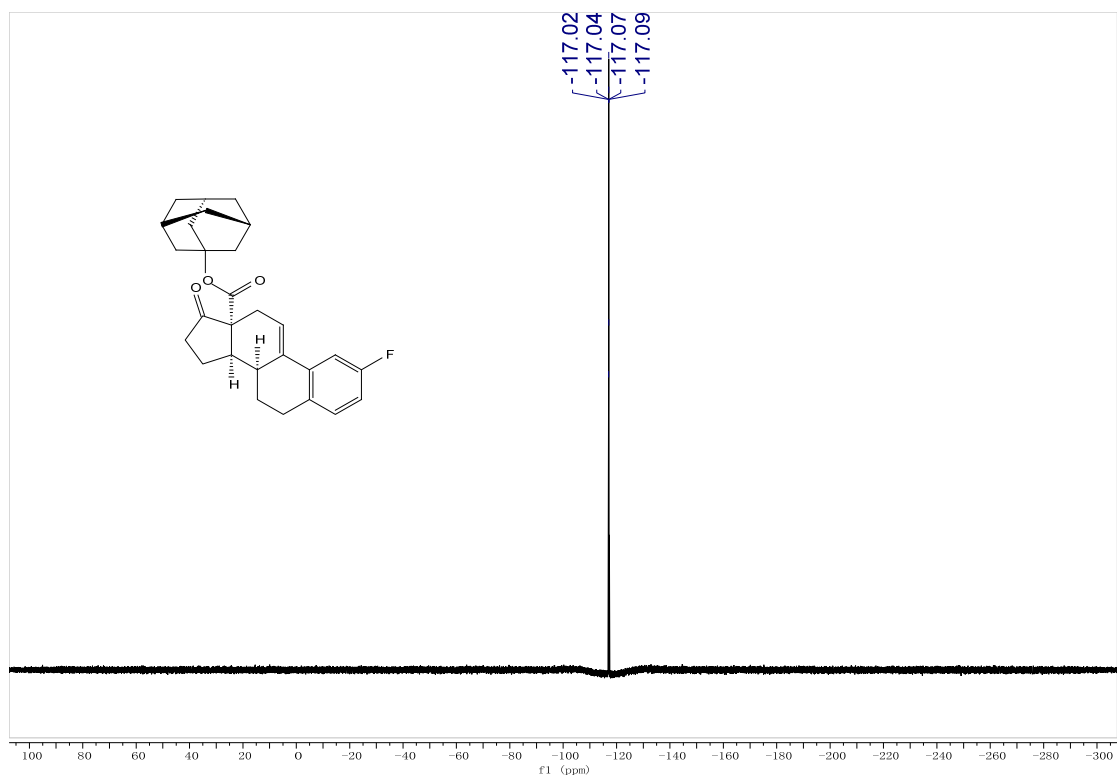

31

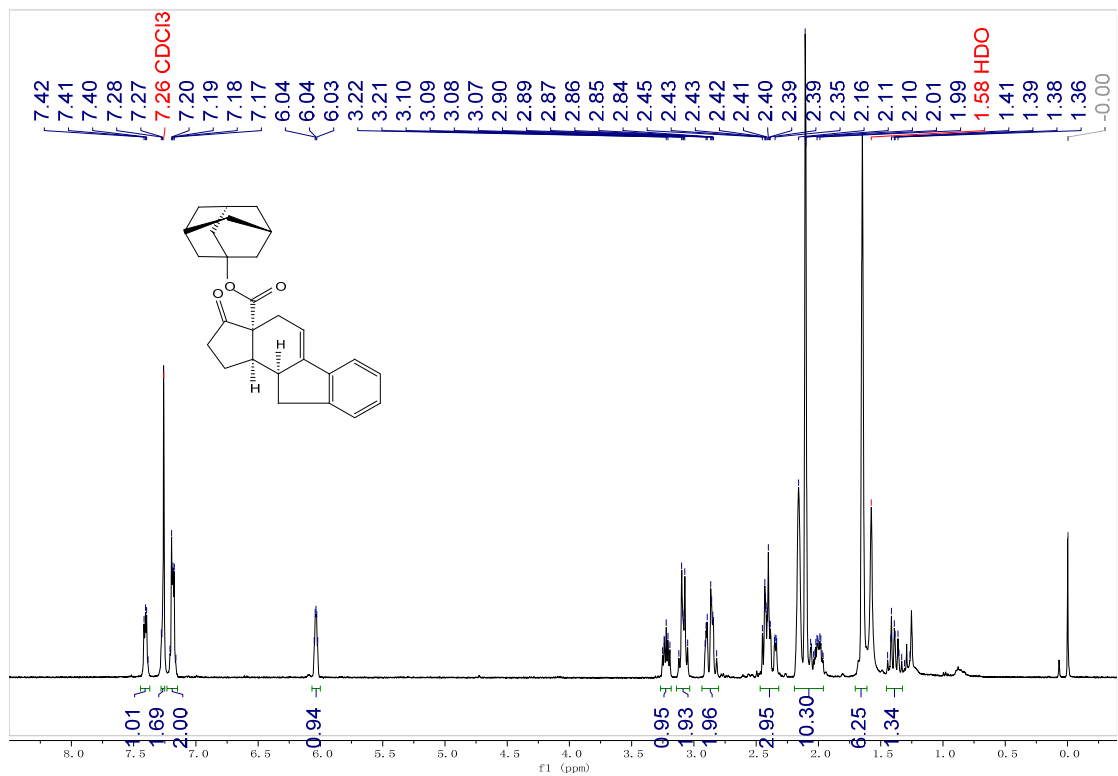

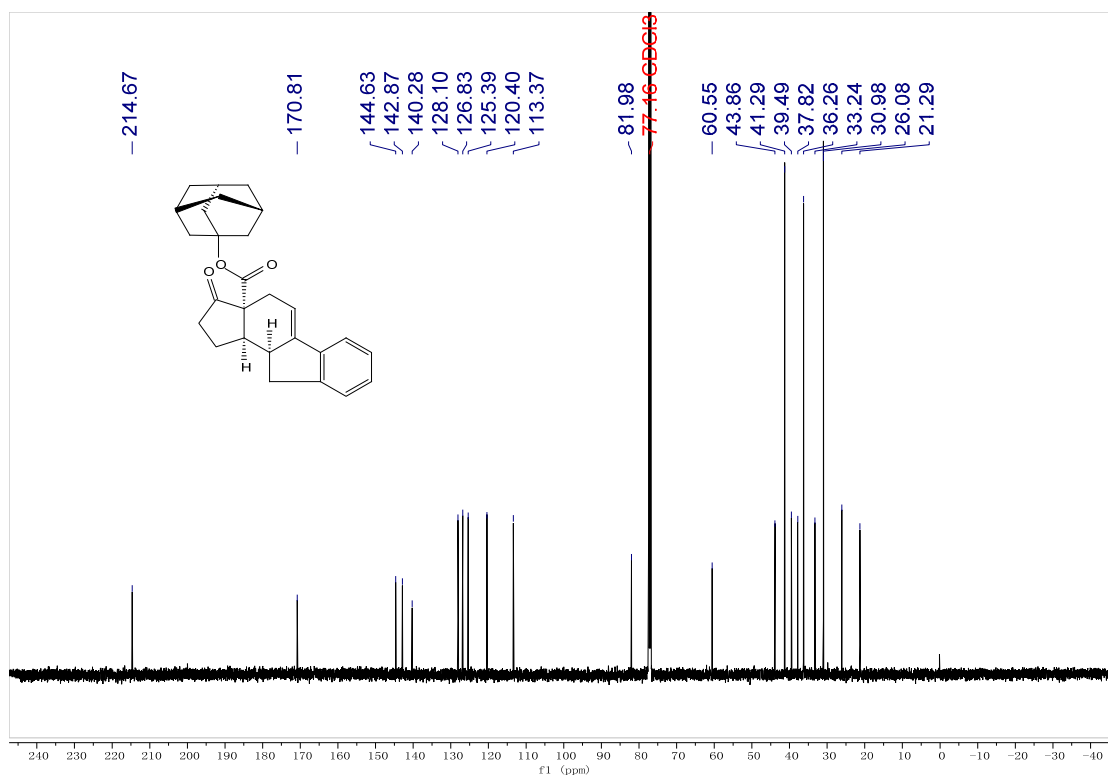

### 3m

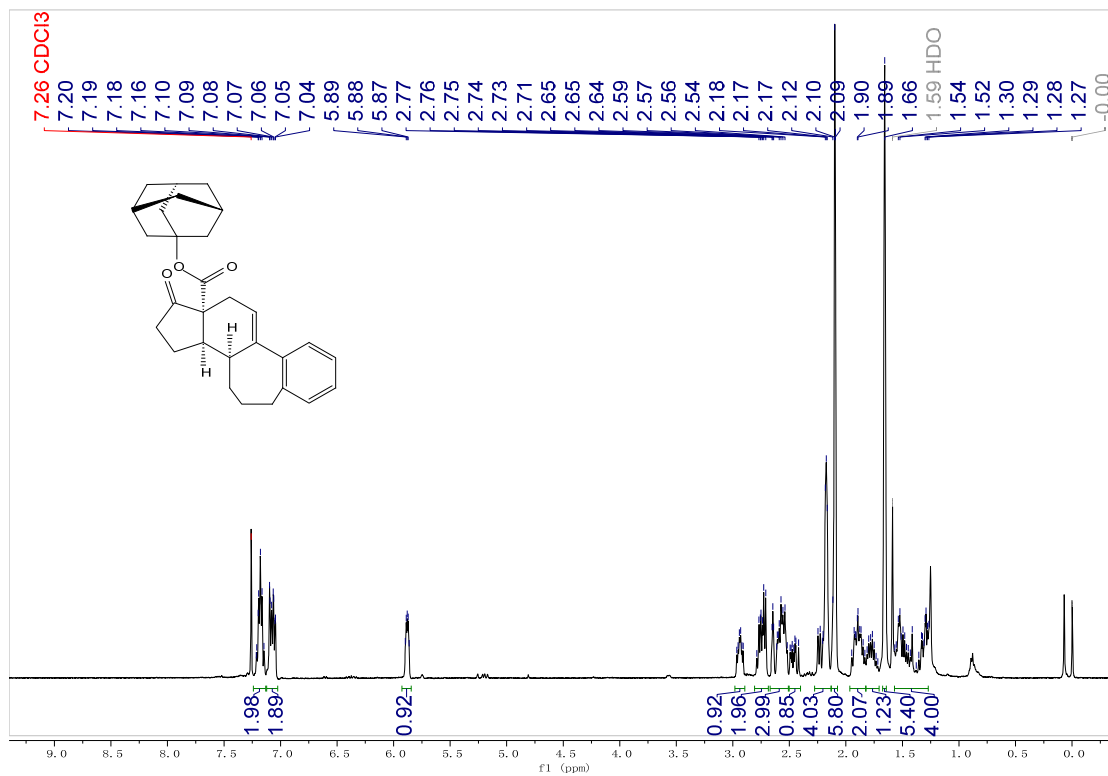



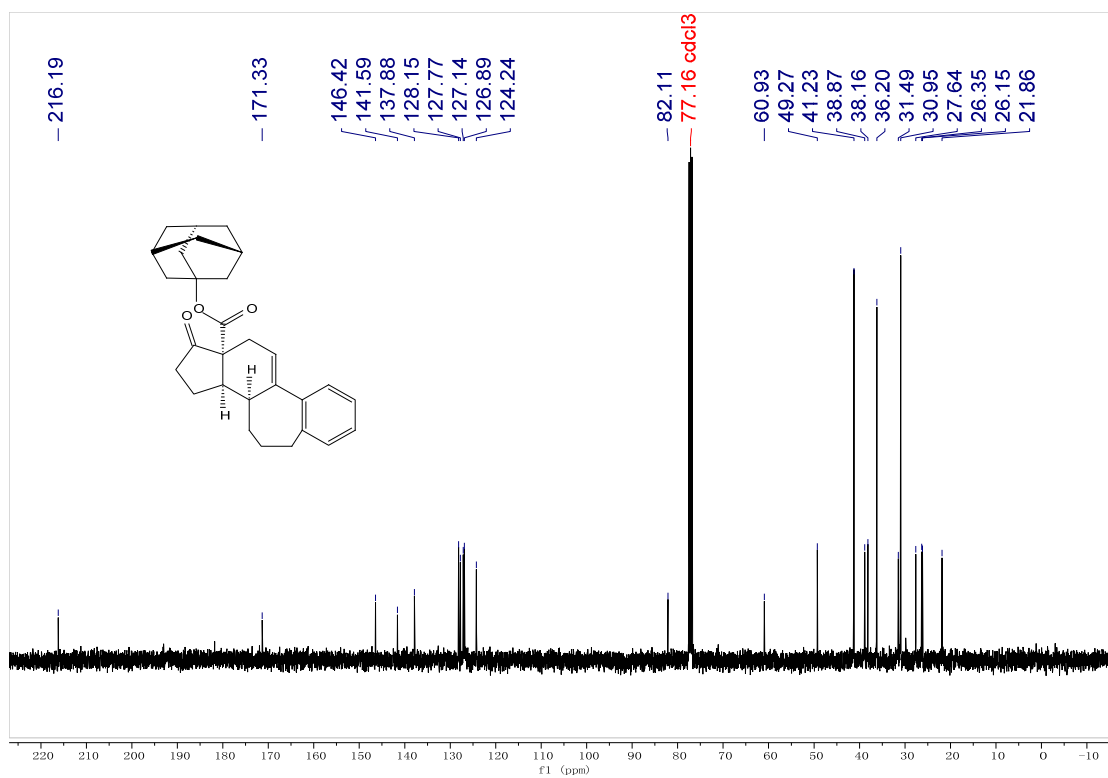

3n

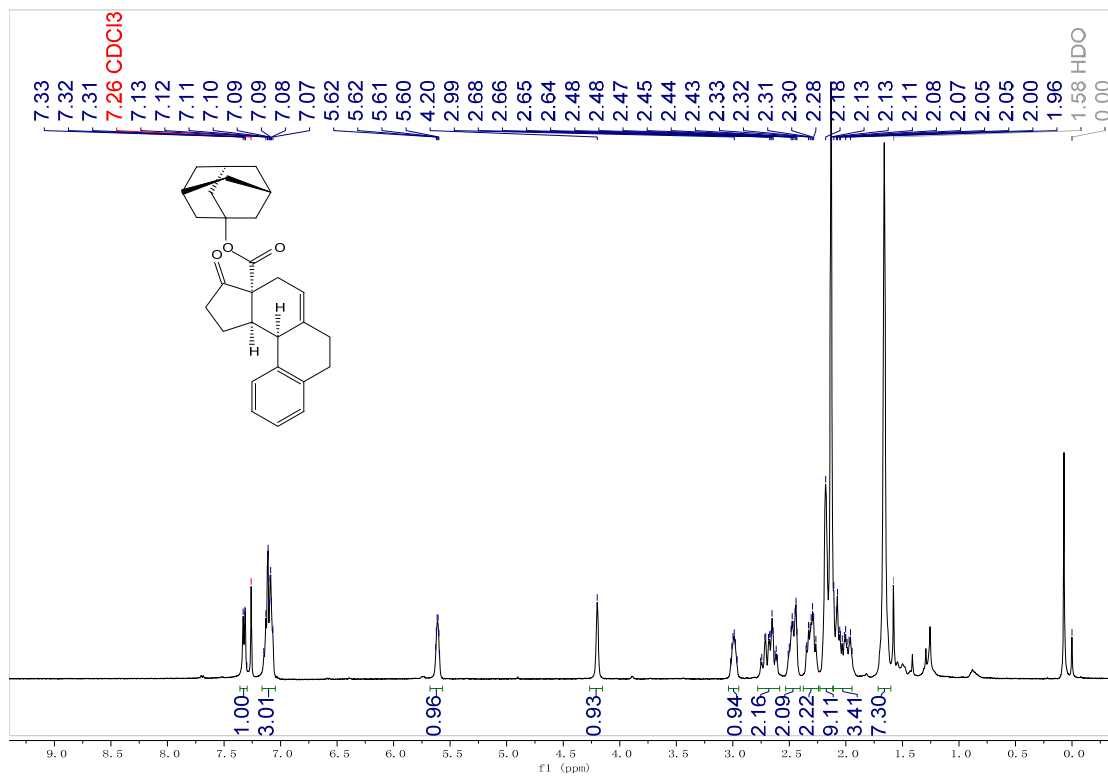

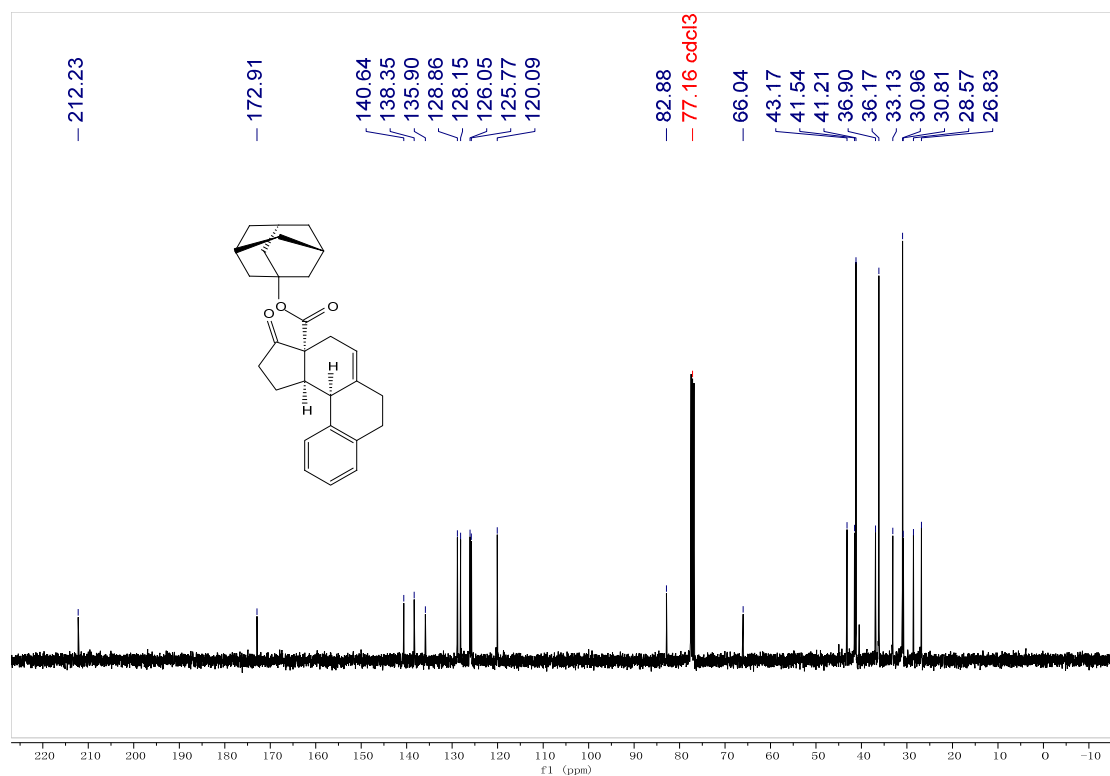

30

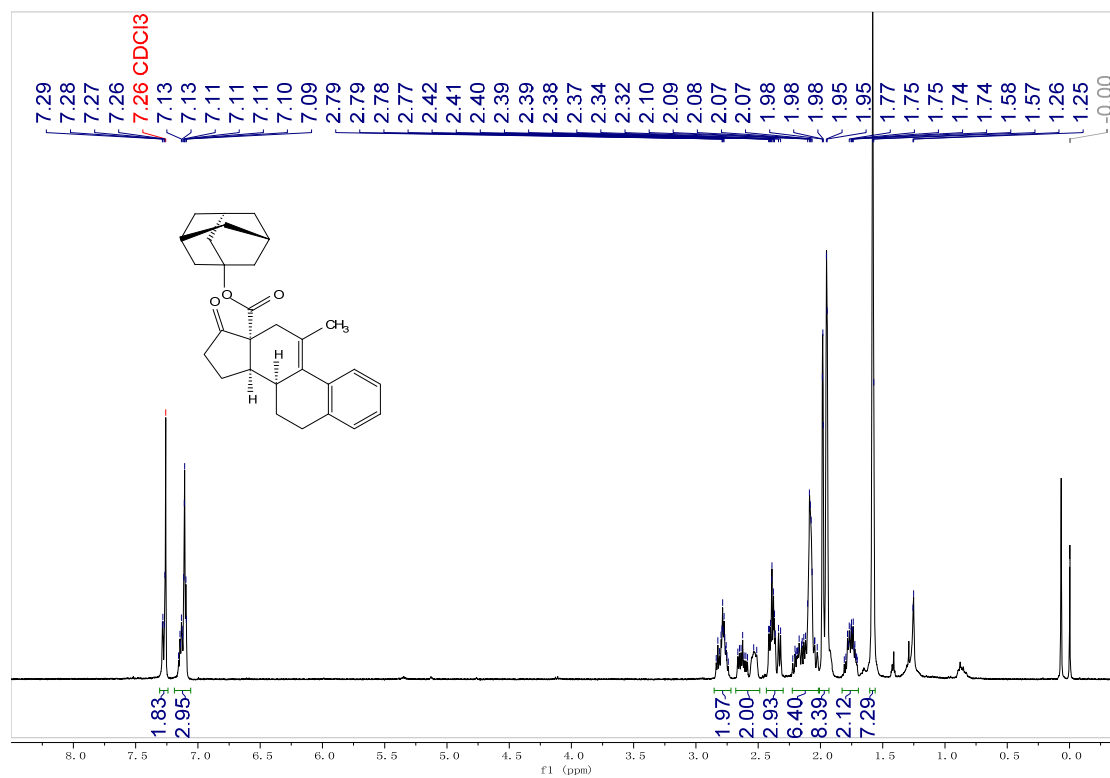

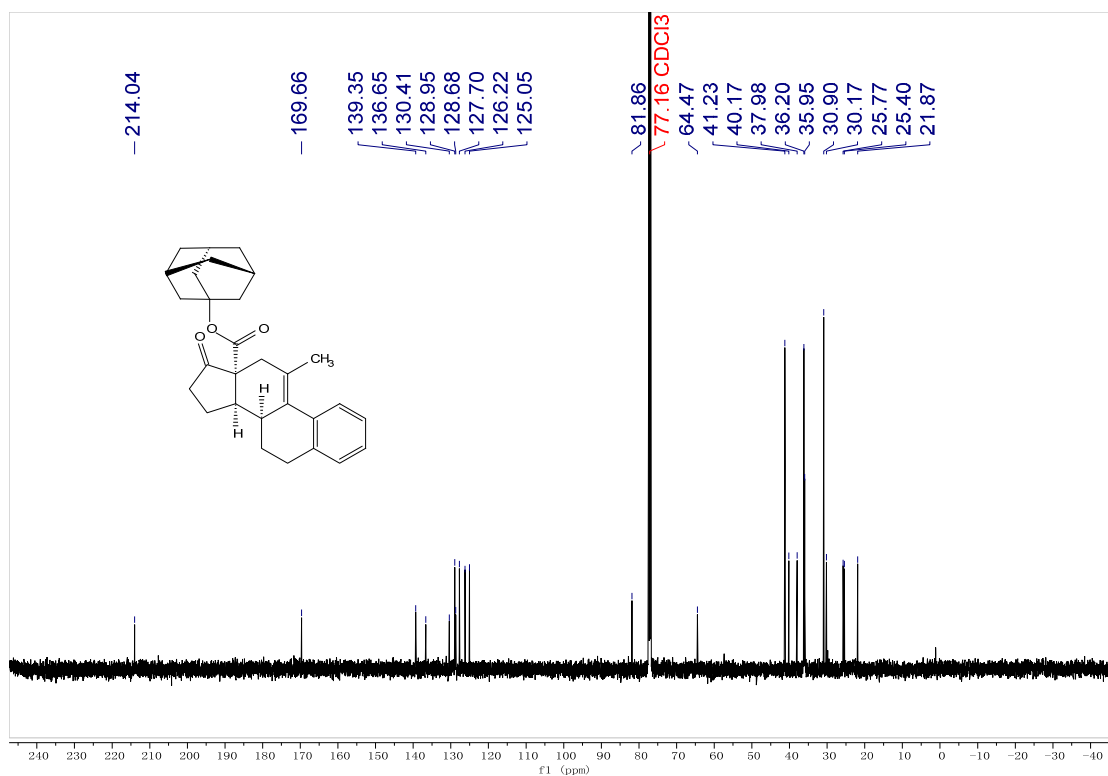

3p

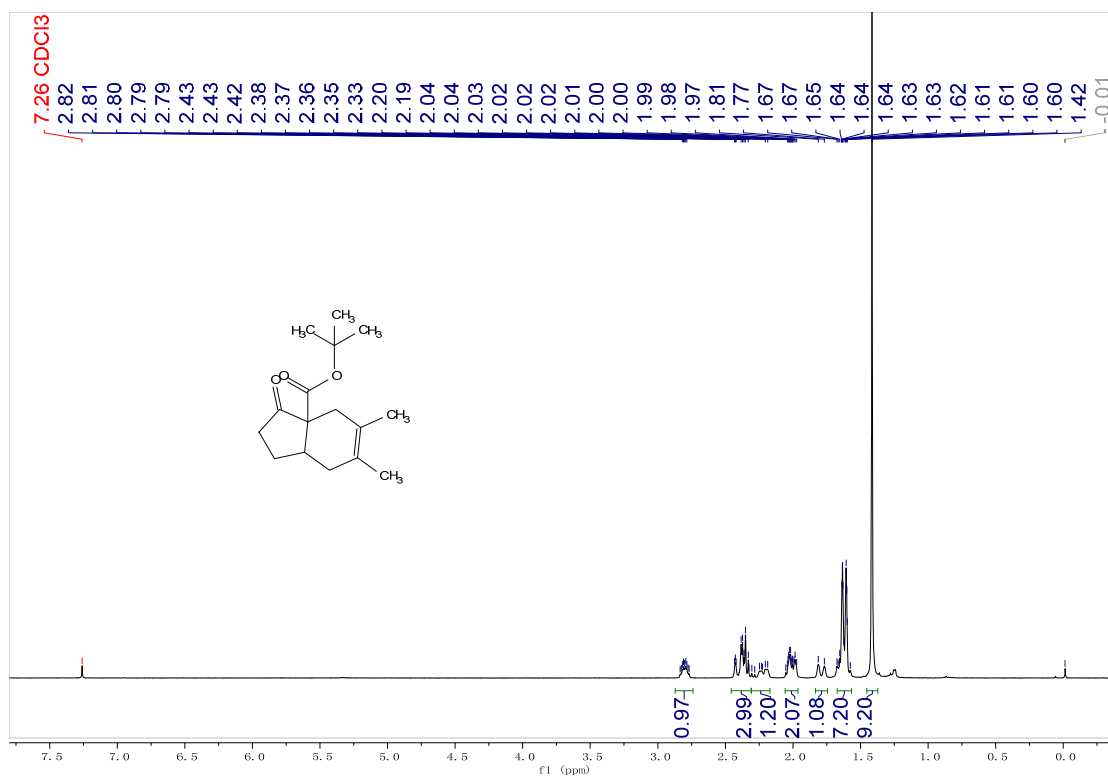

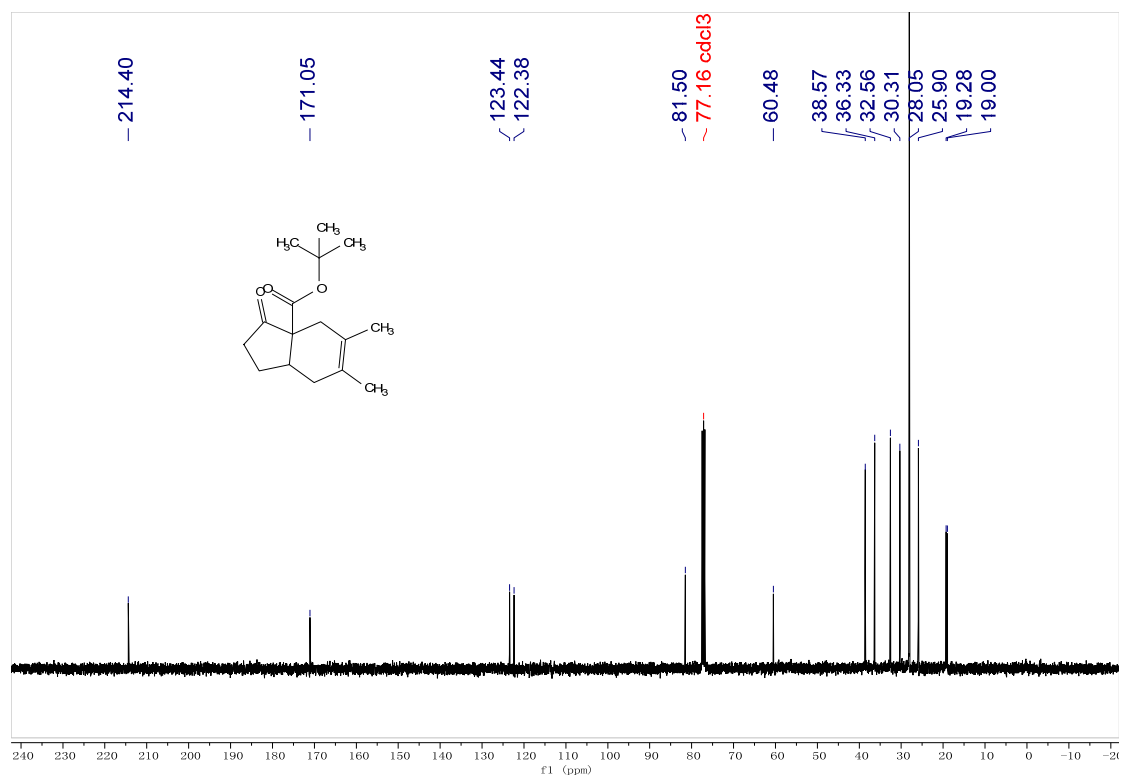

3q

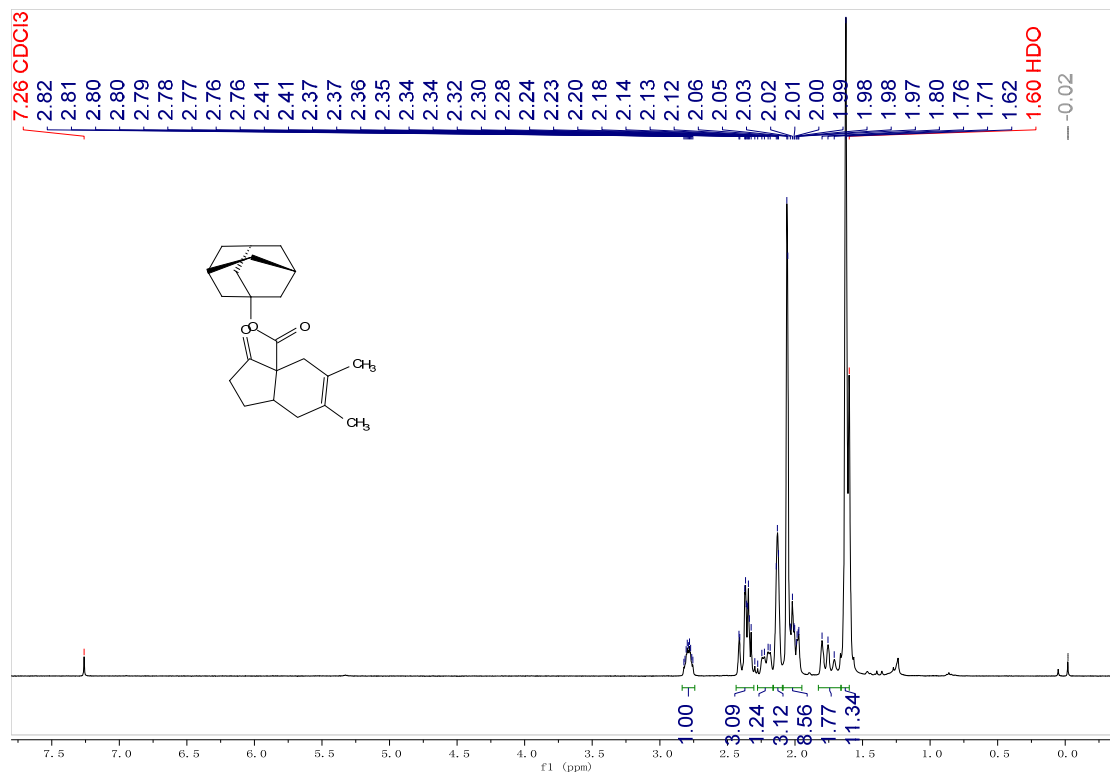

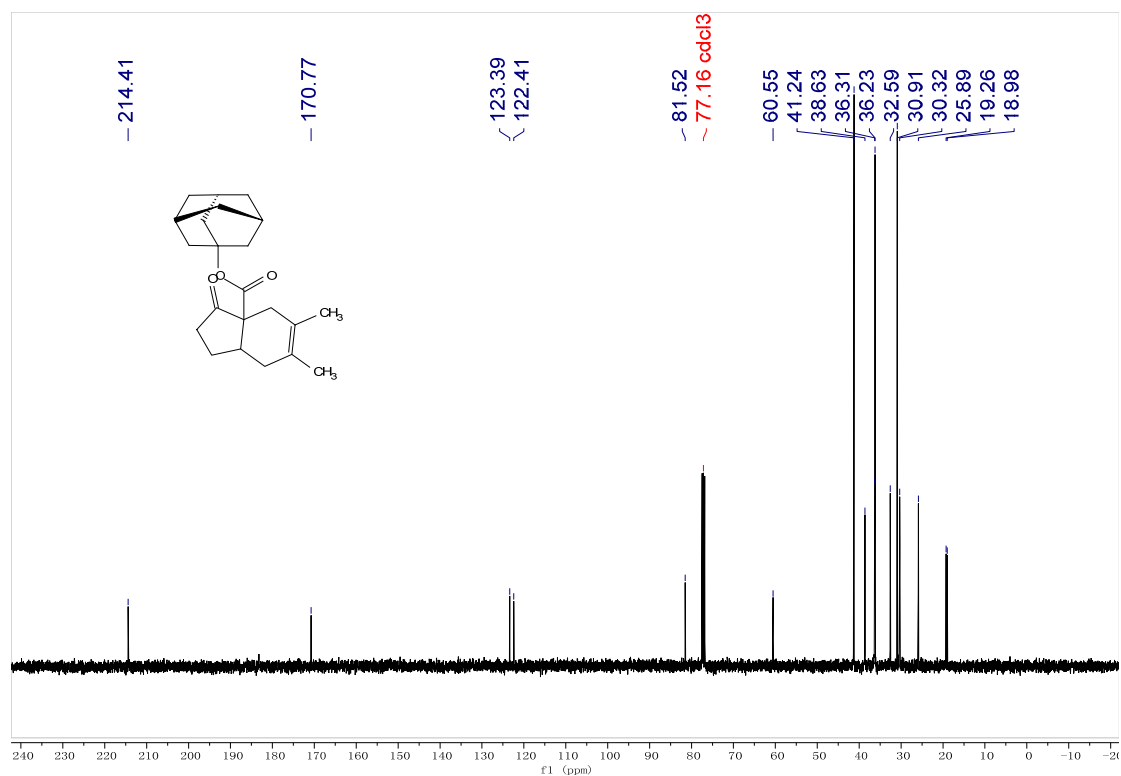

**3r**

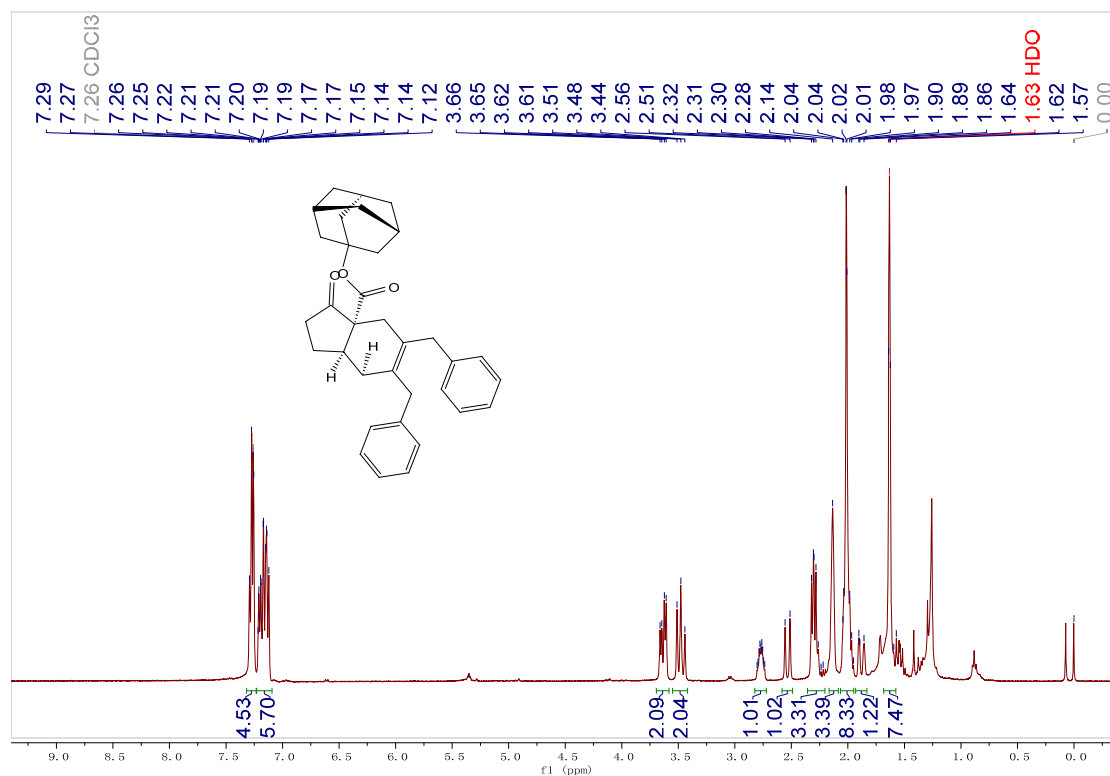

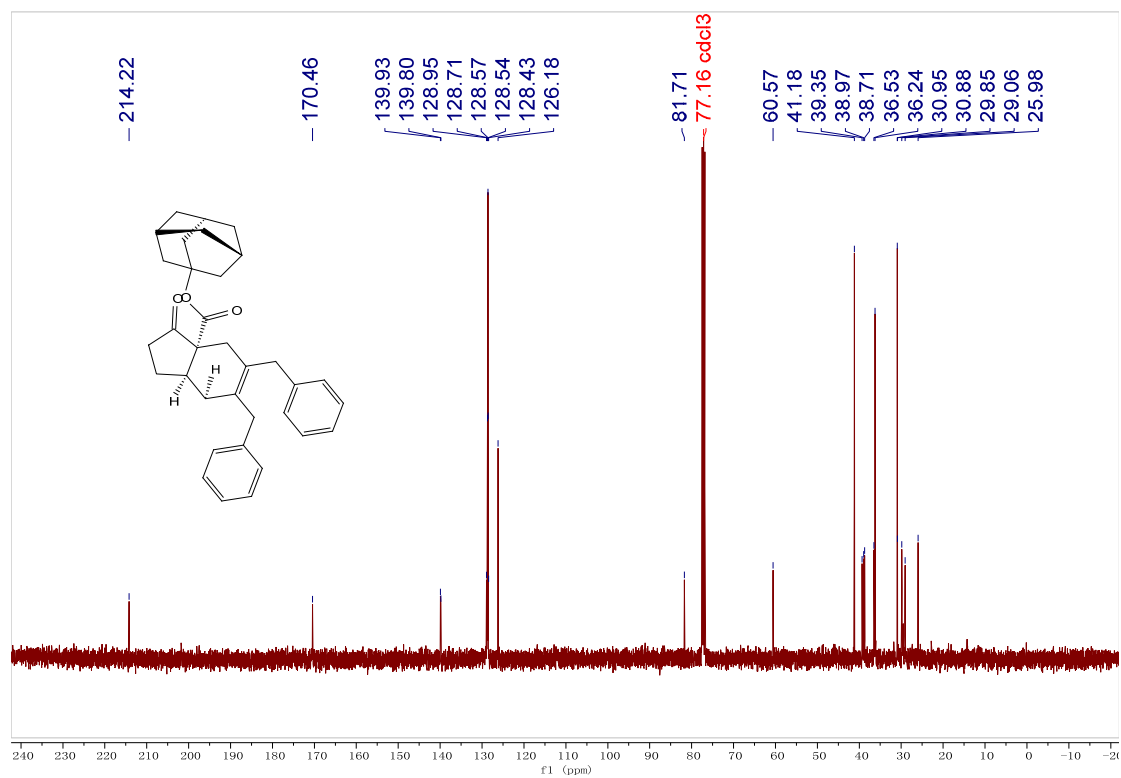

**3s**

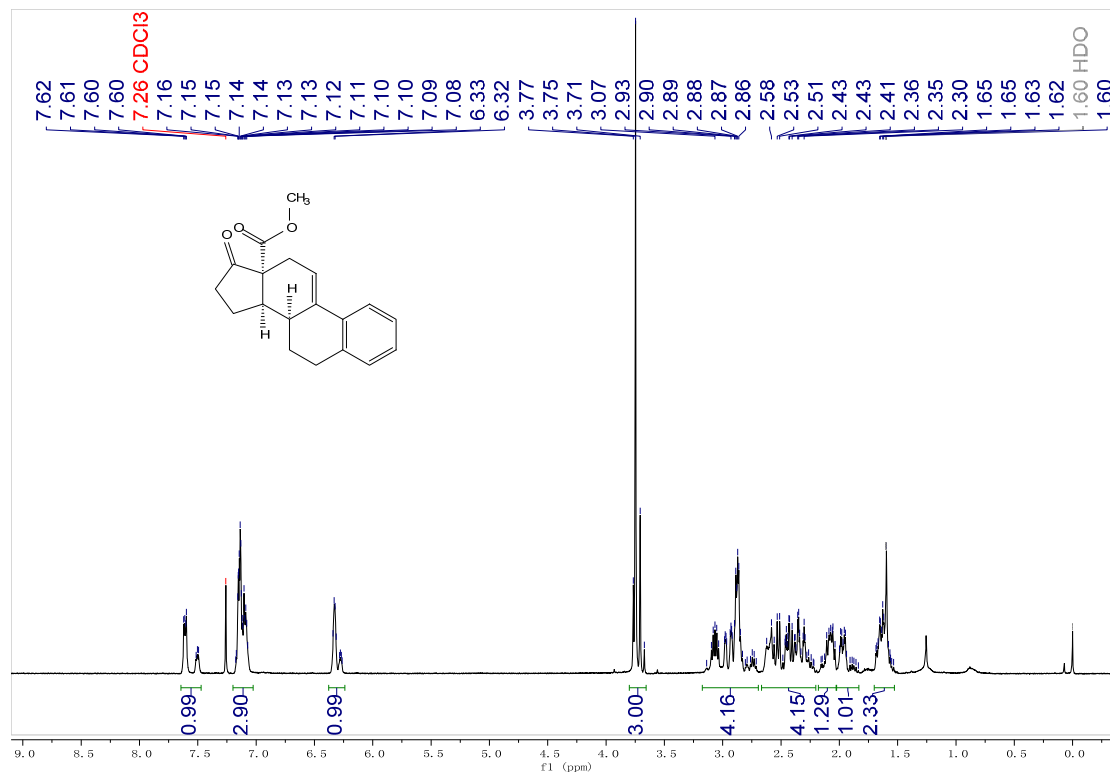

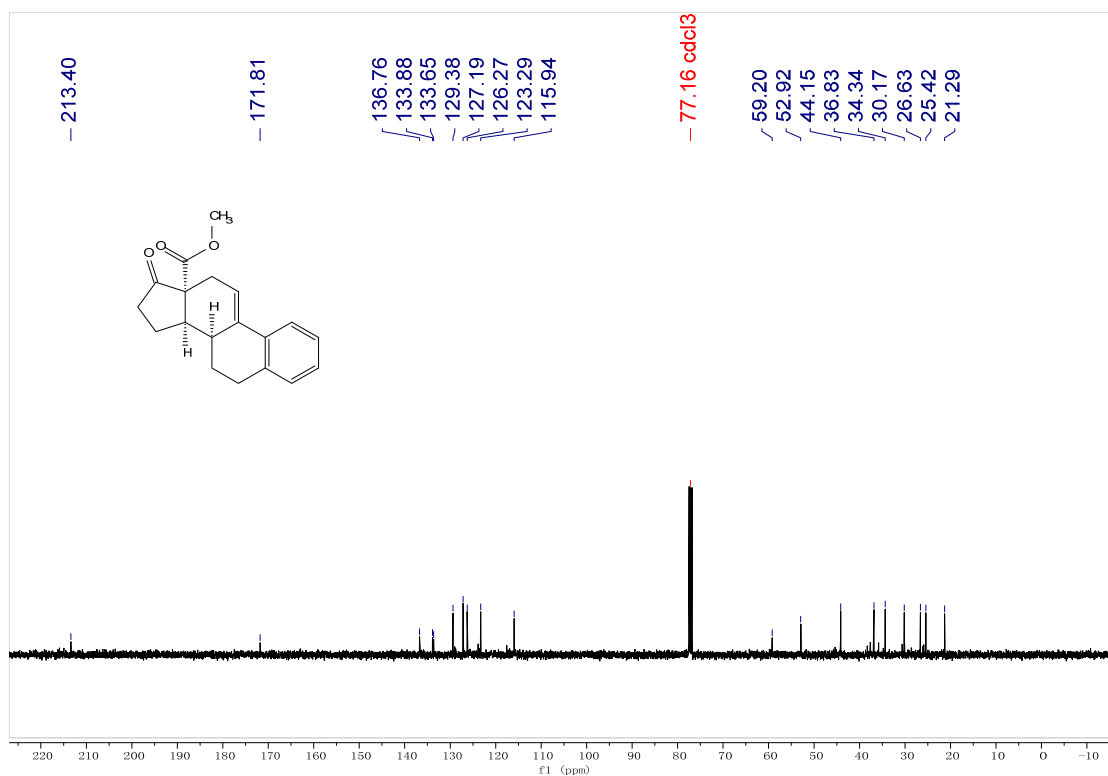

3t

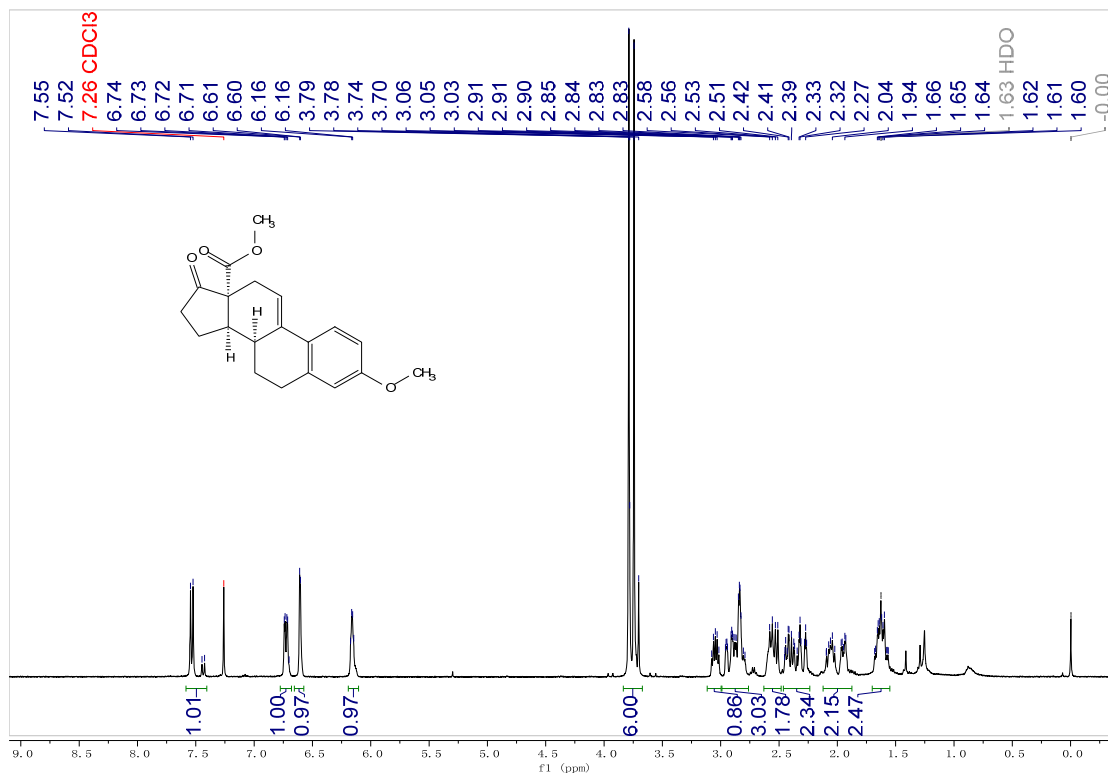

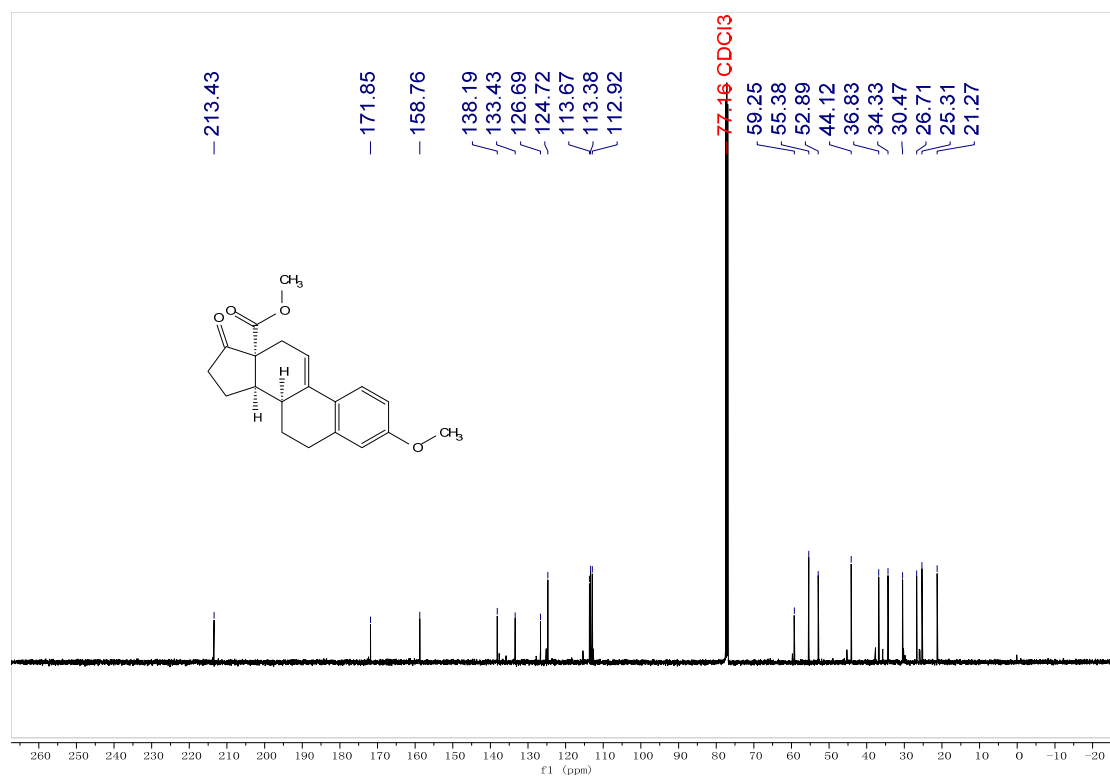

3u

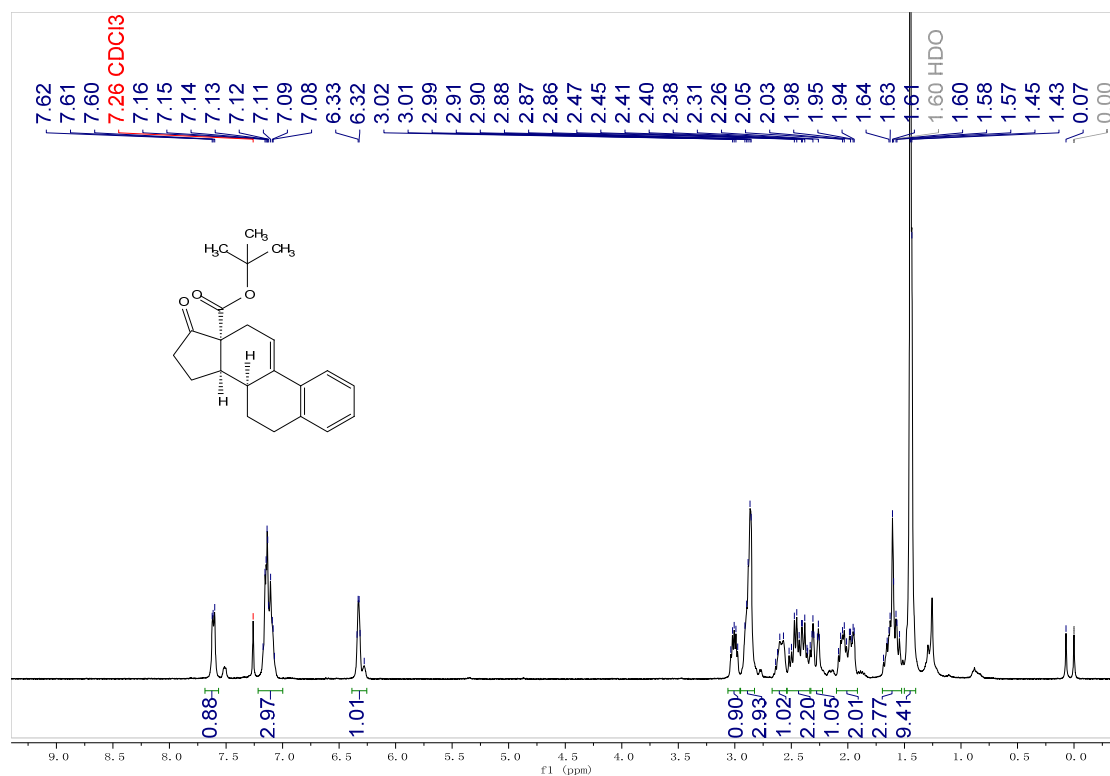



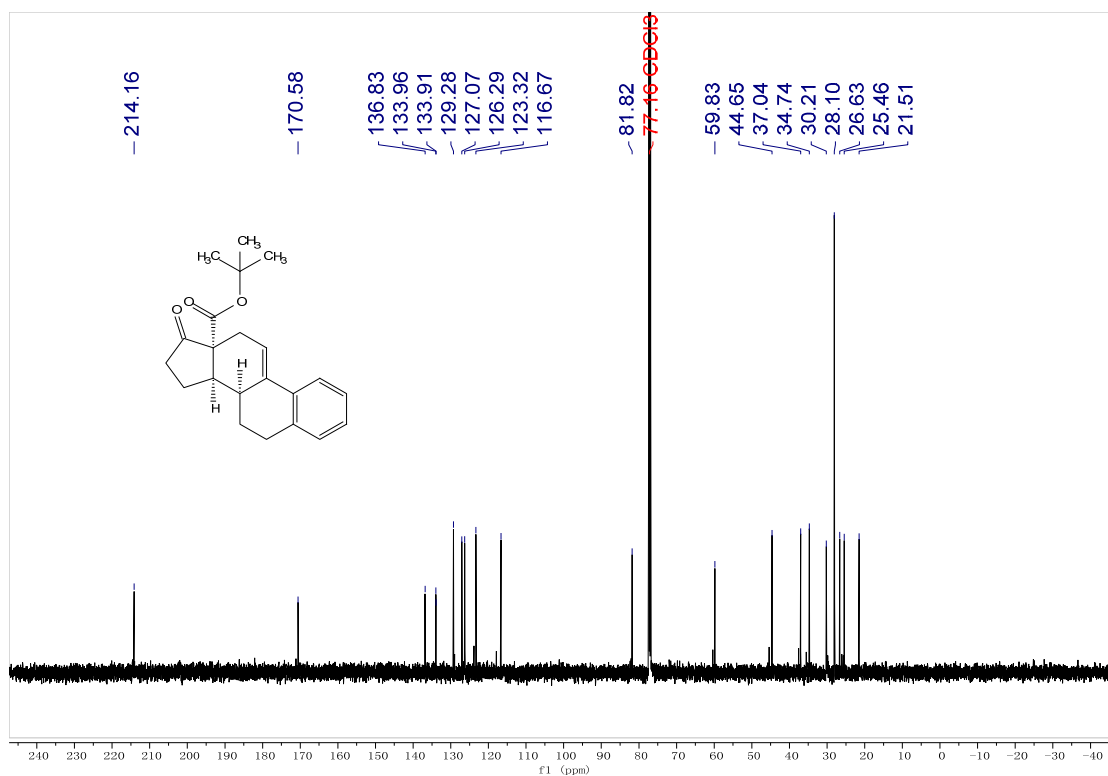

3v

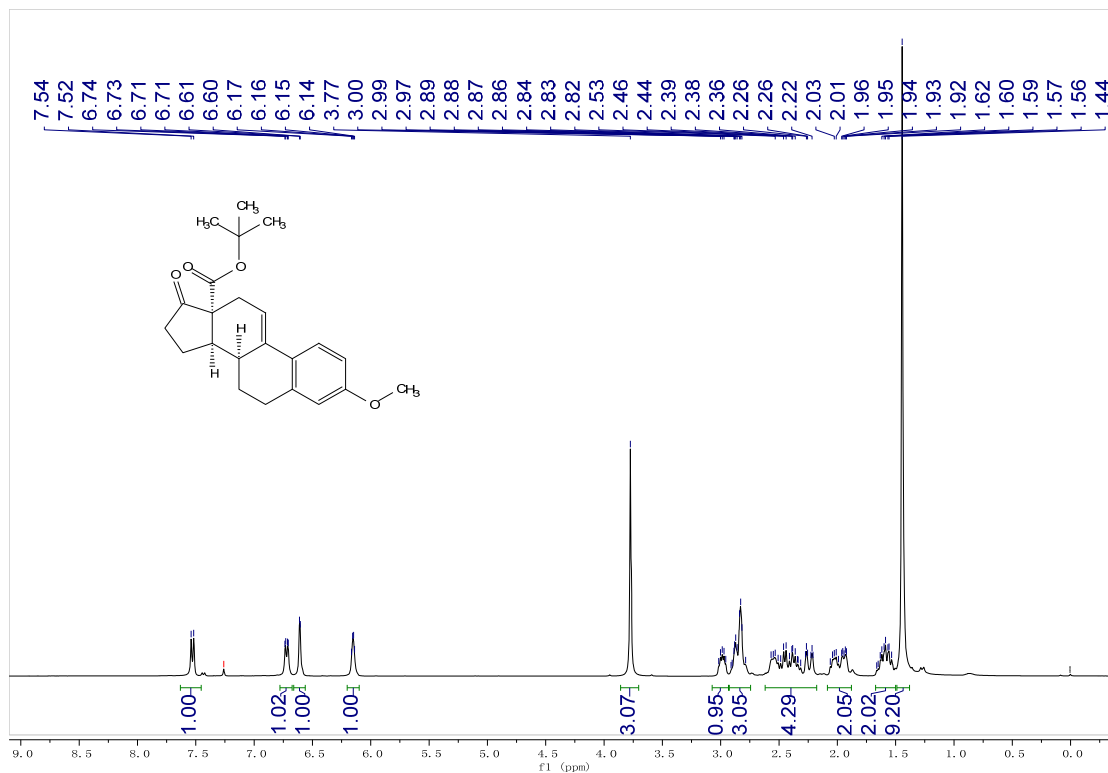

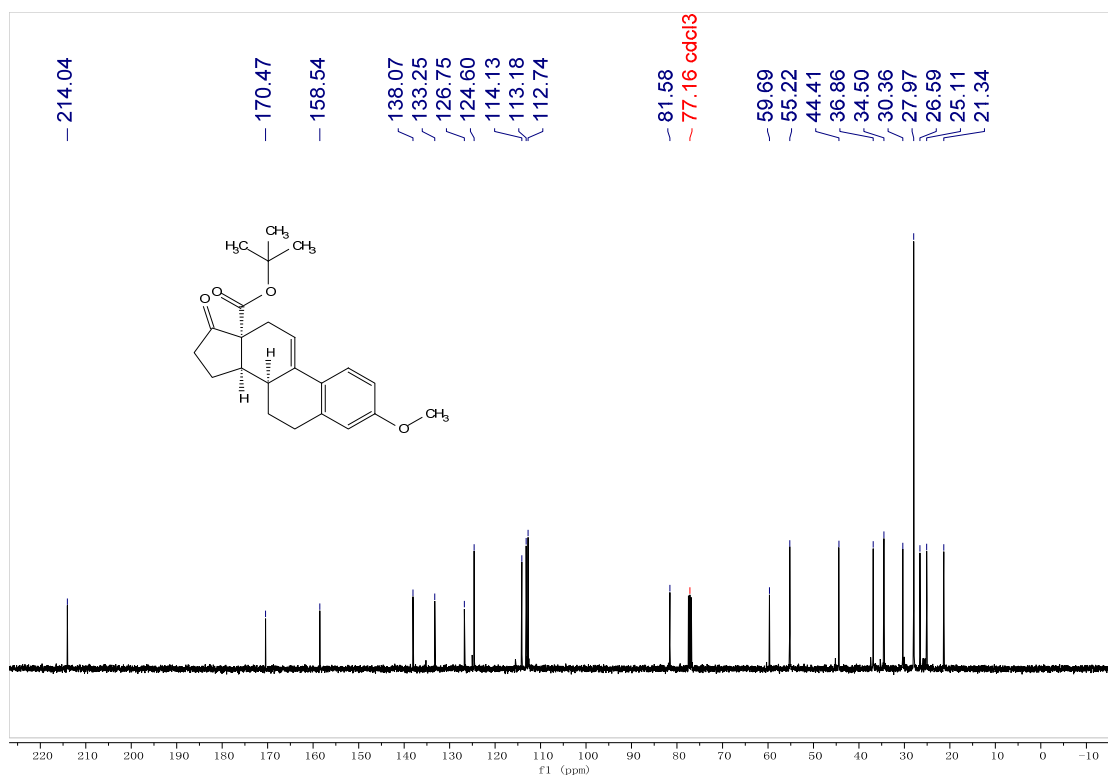

3w

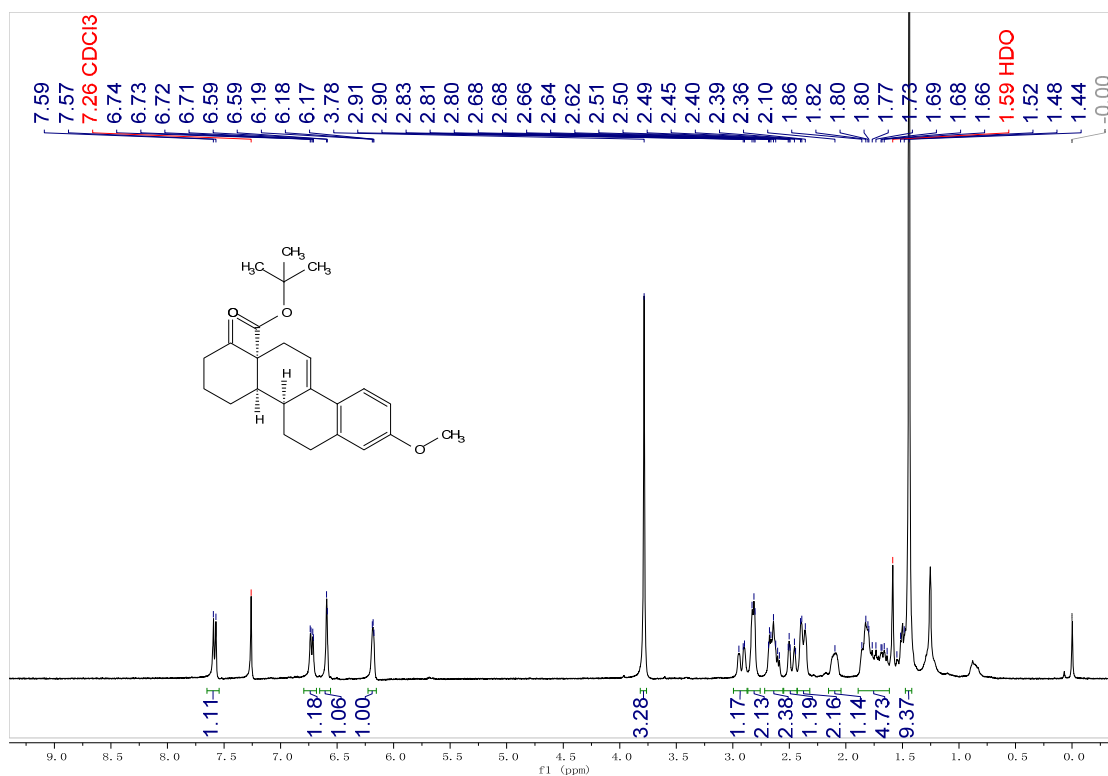

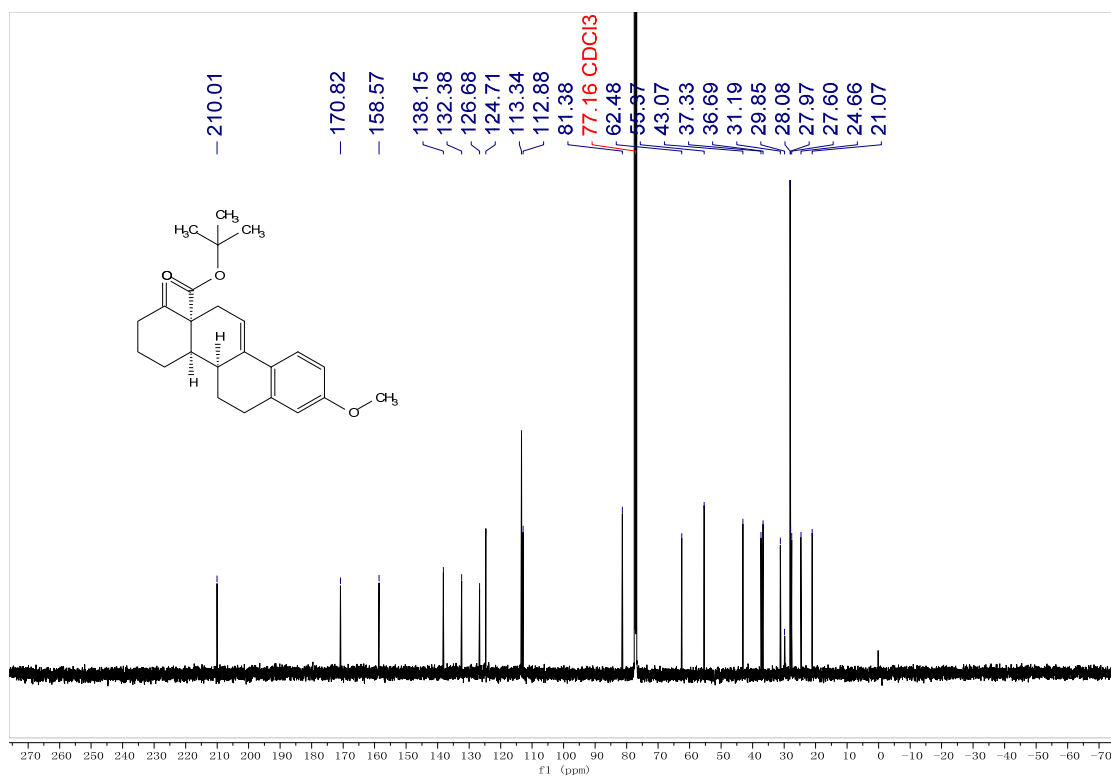

3x

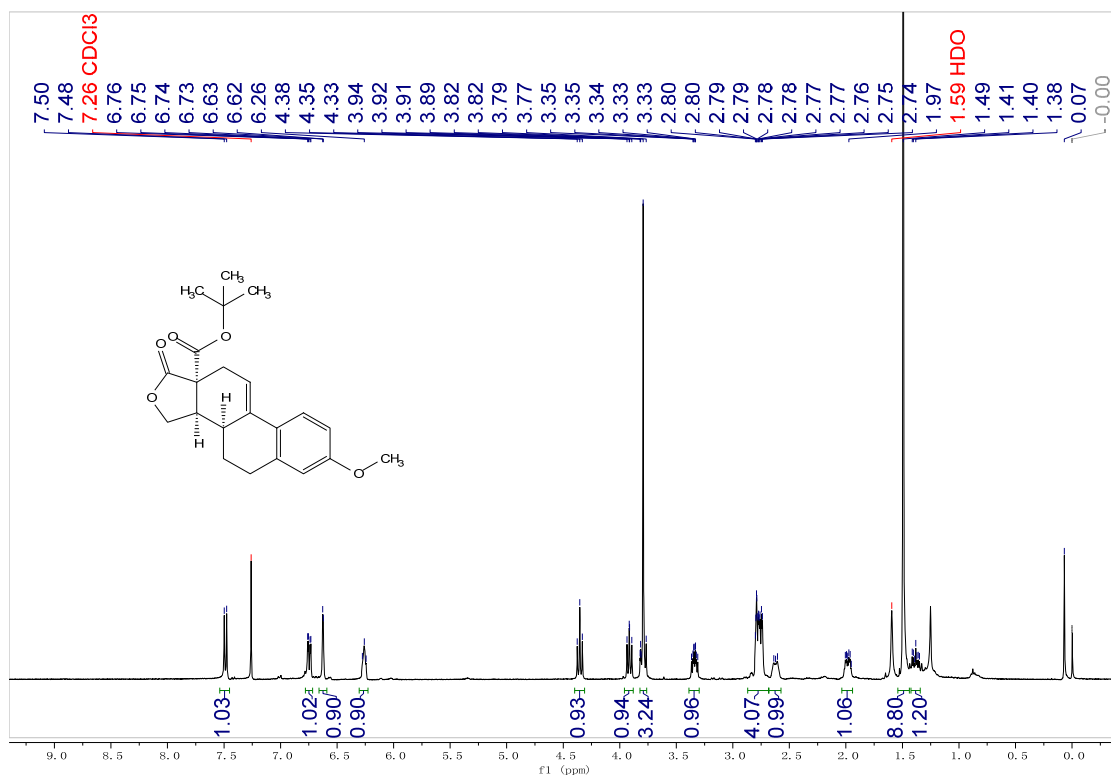

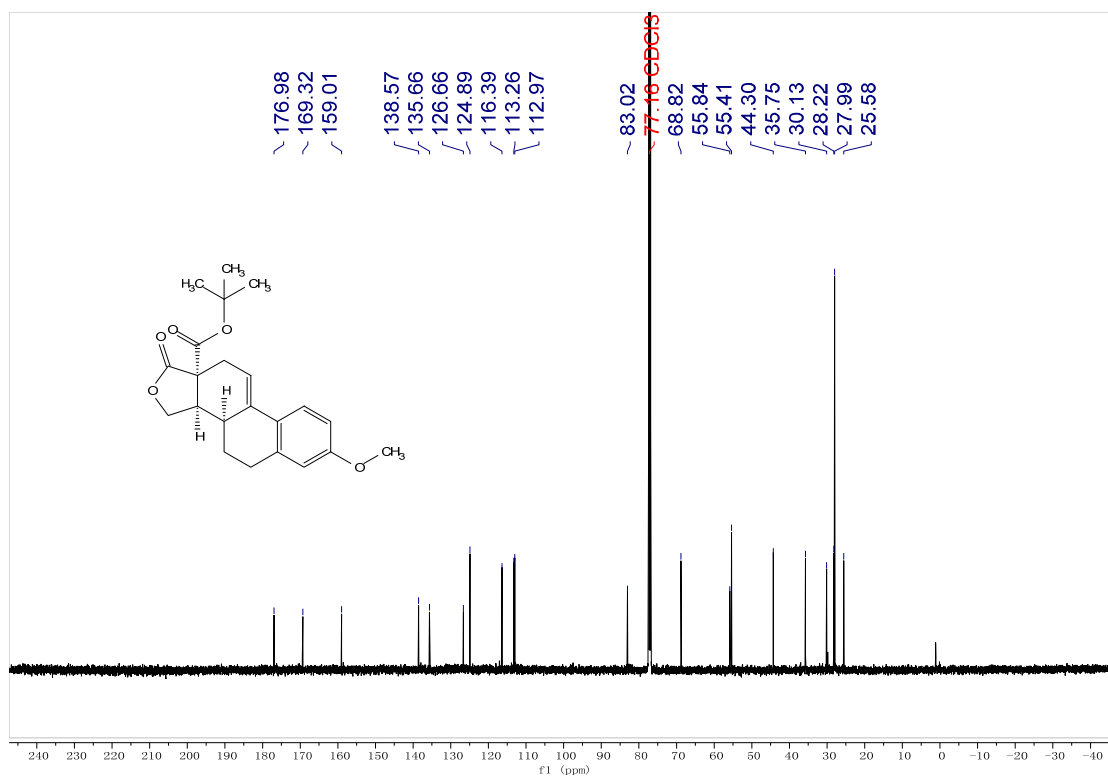

3y

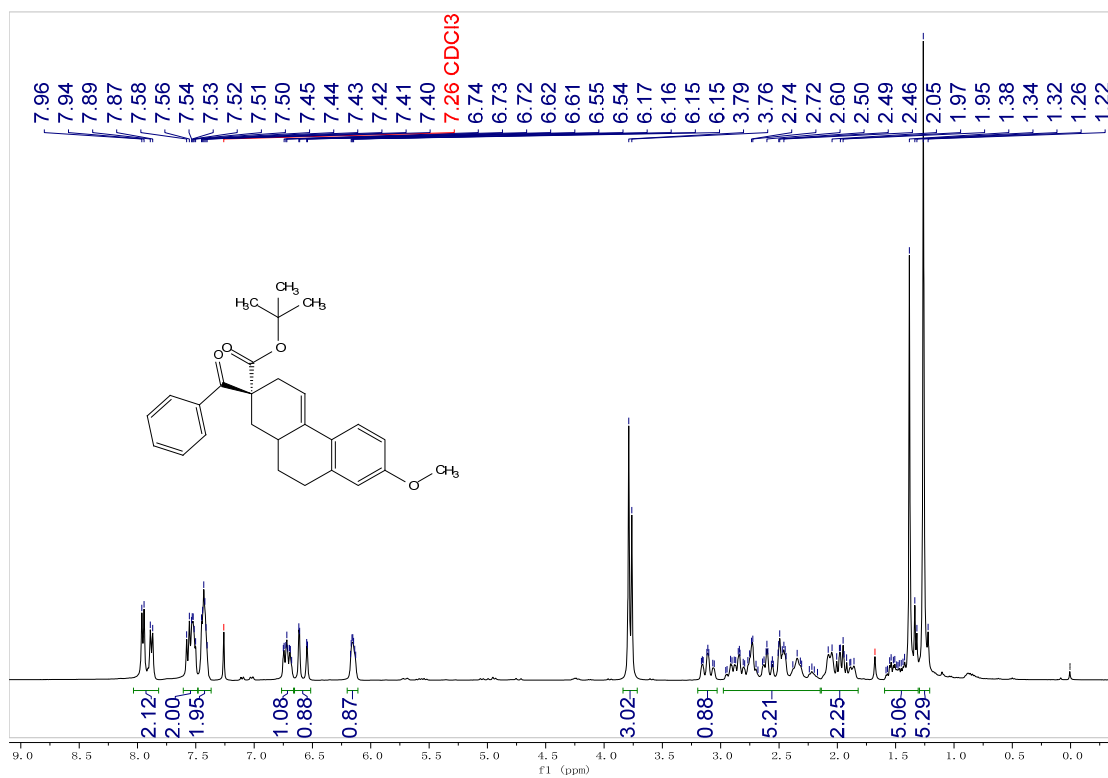

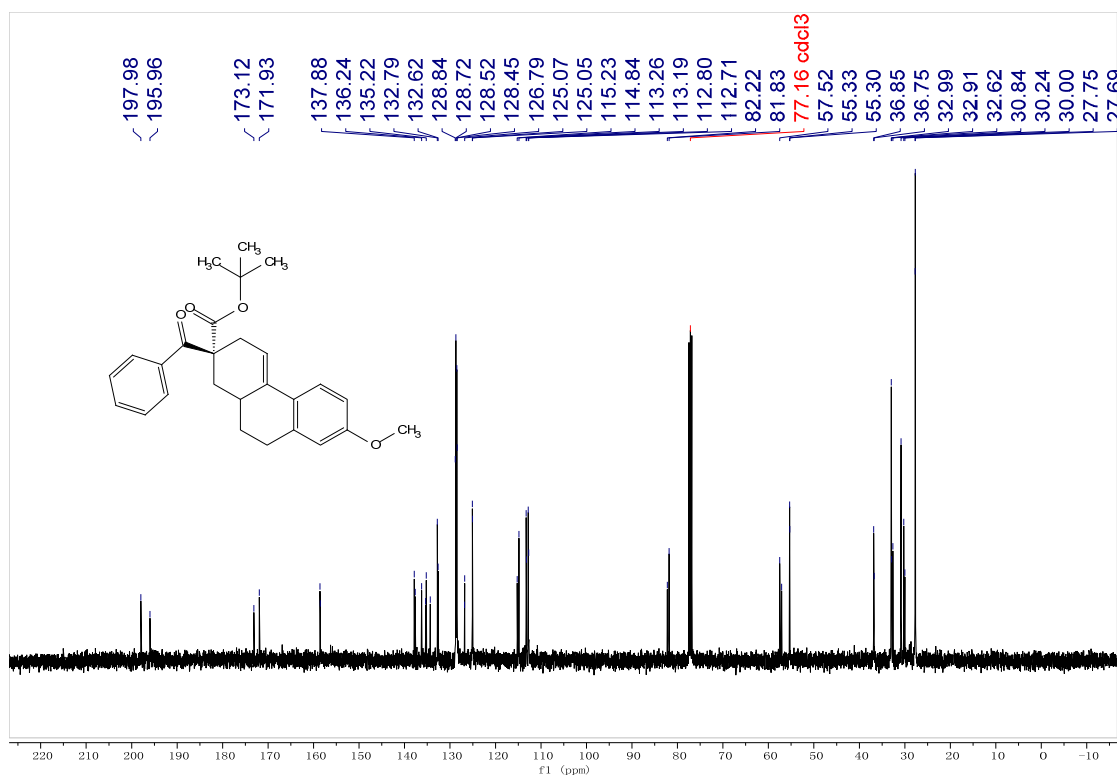

**3z**

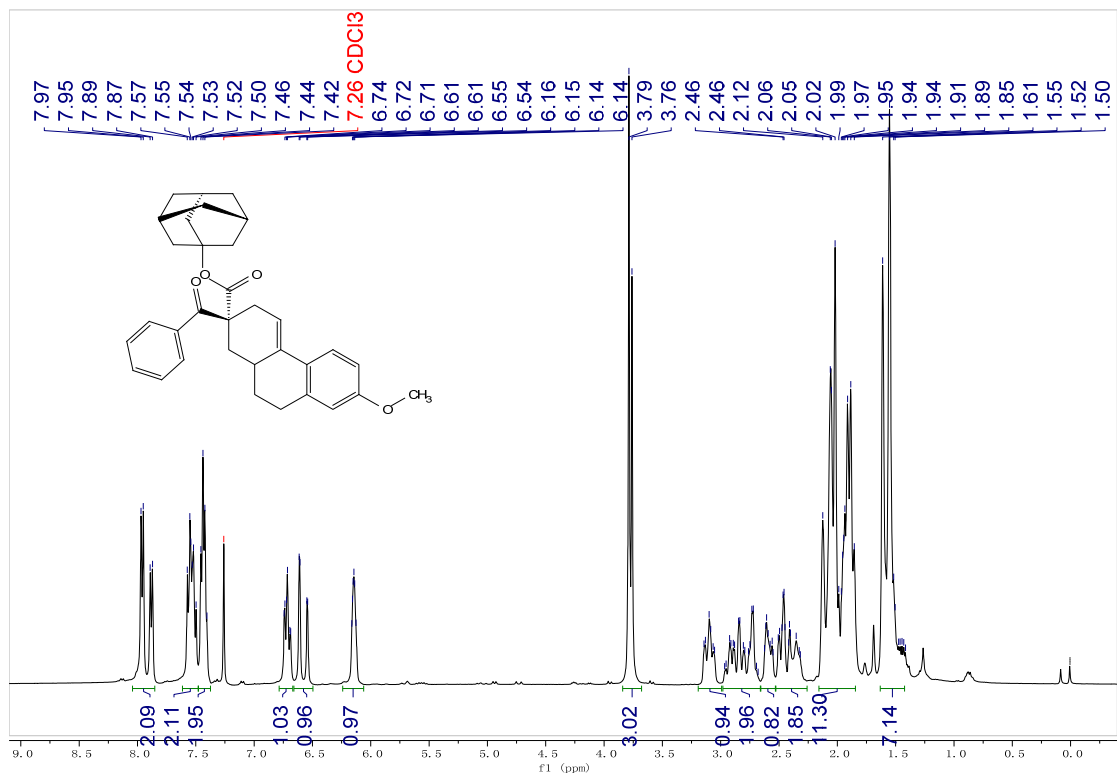

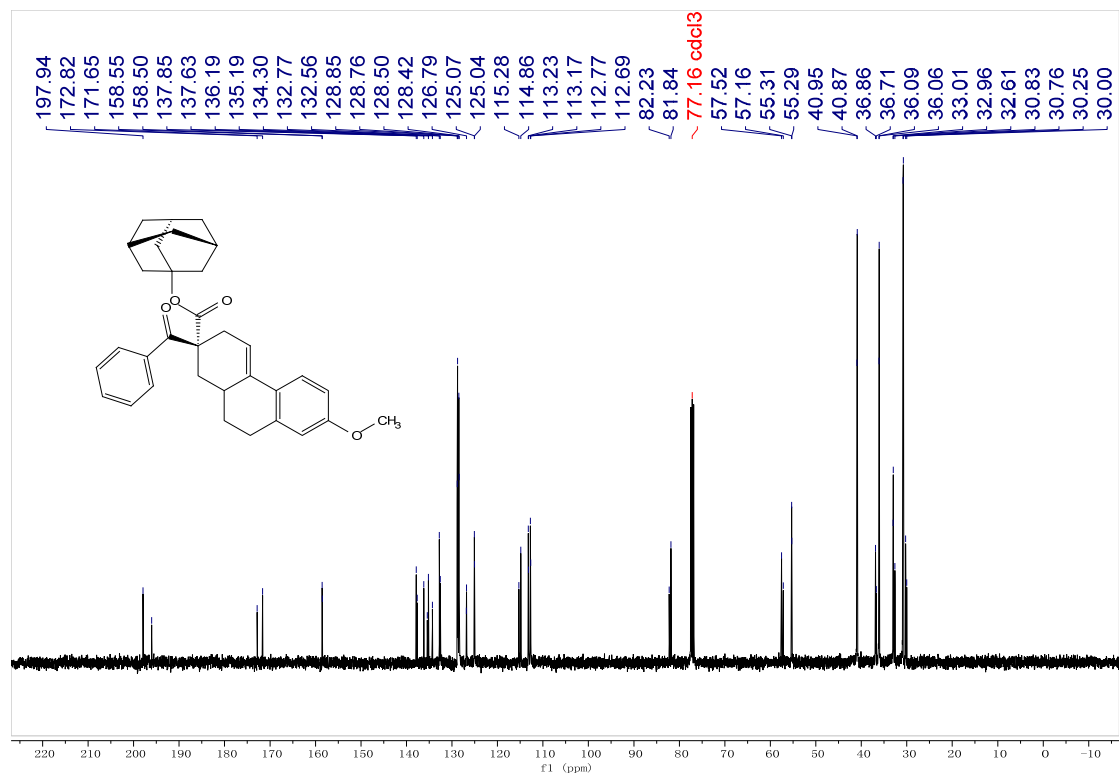

7

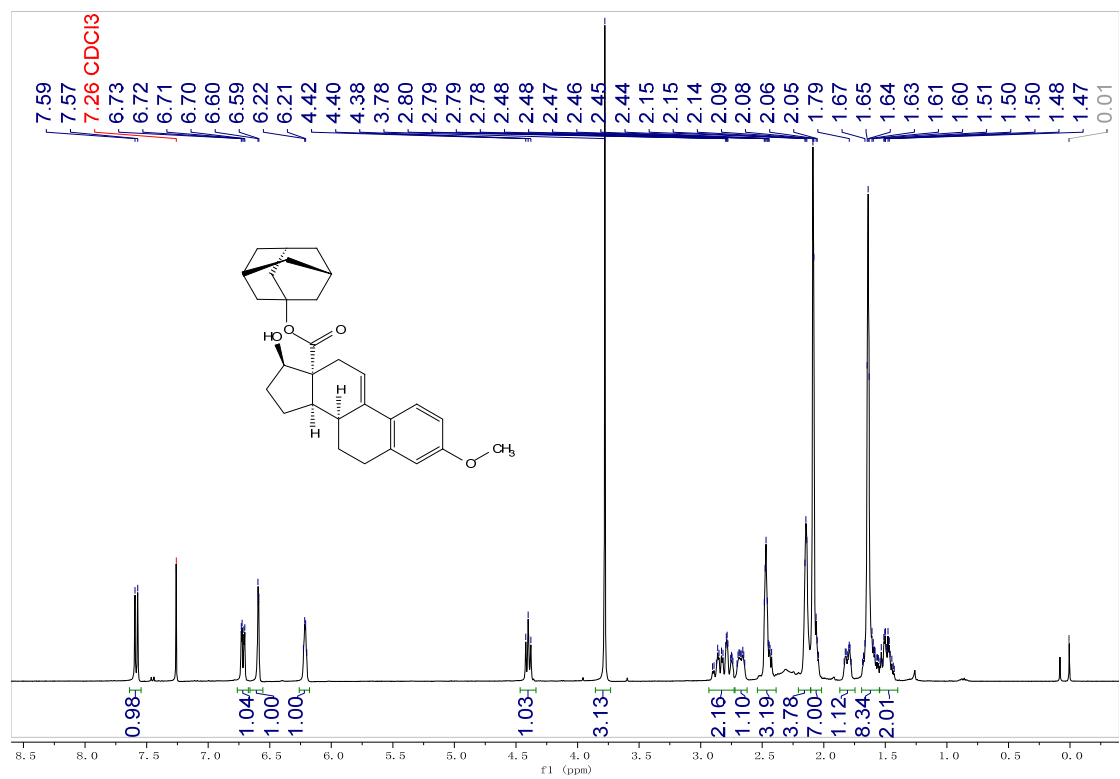

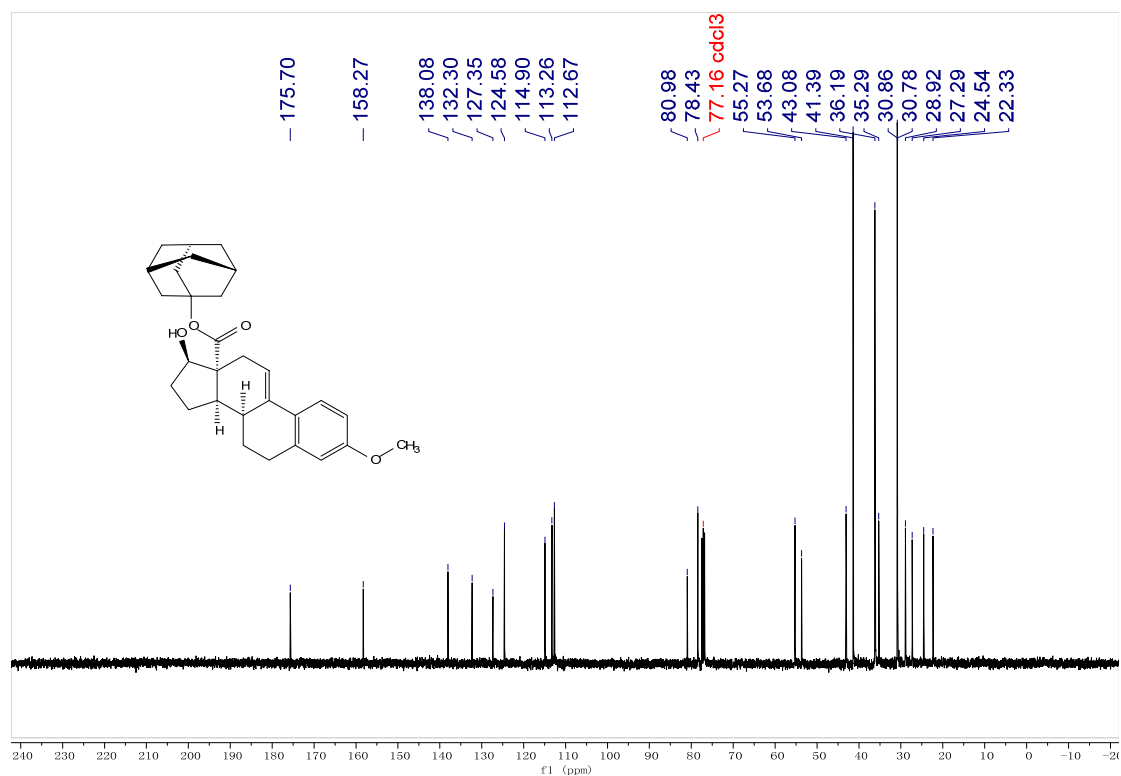

8

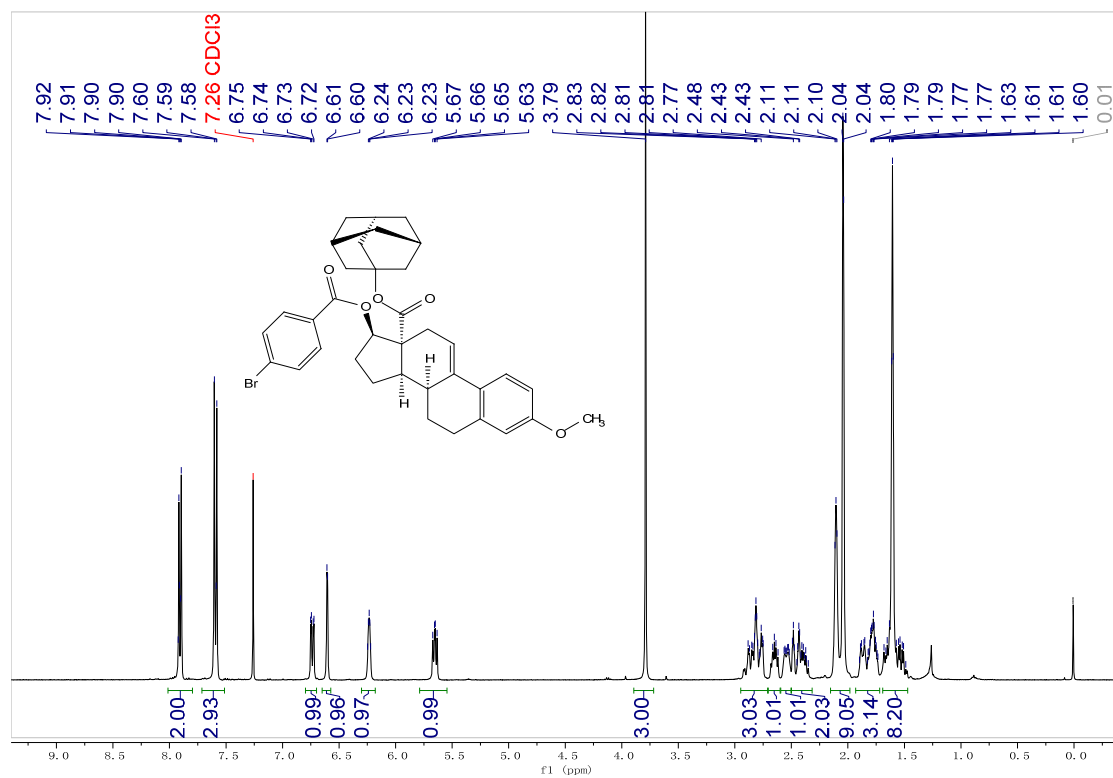

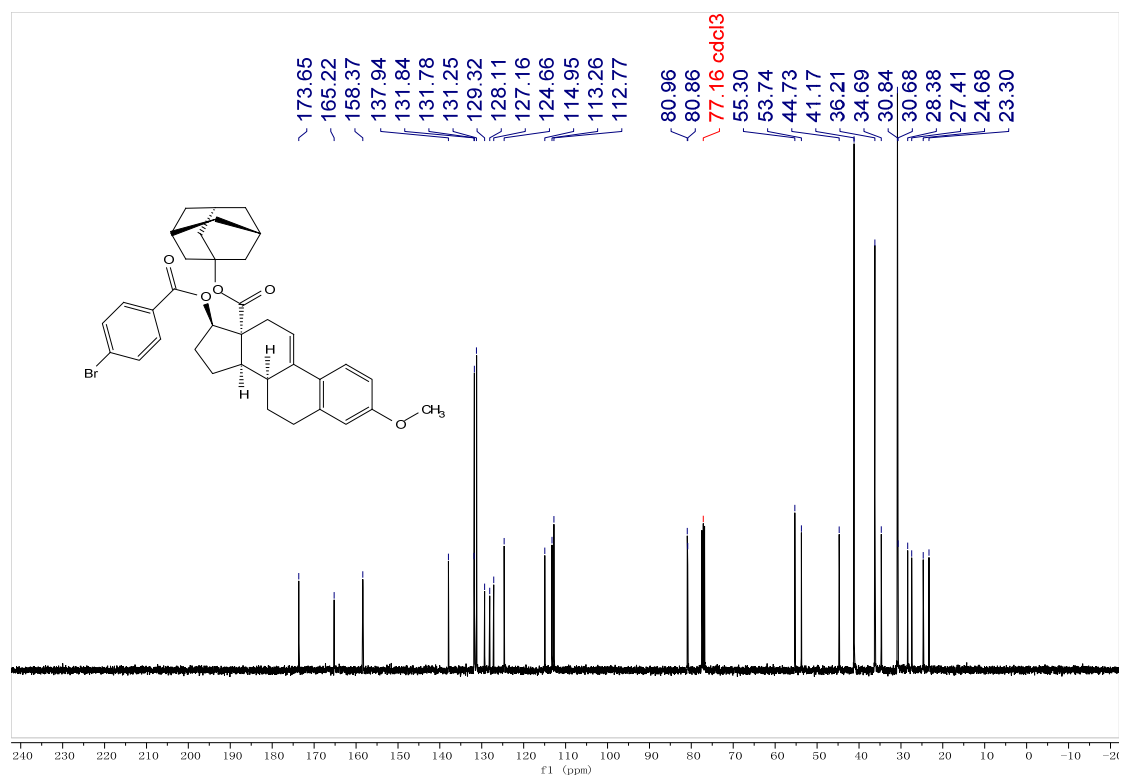

9

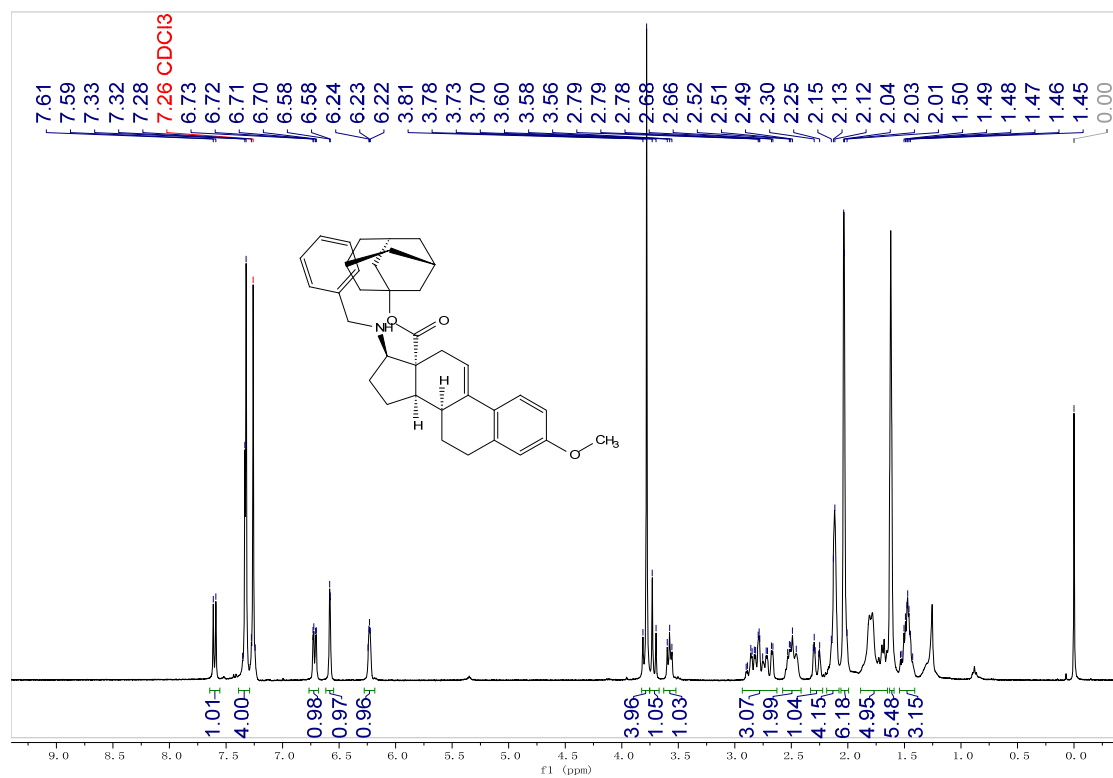



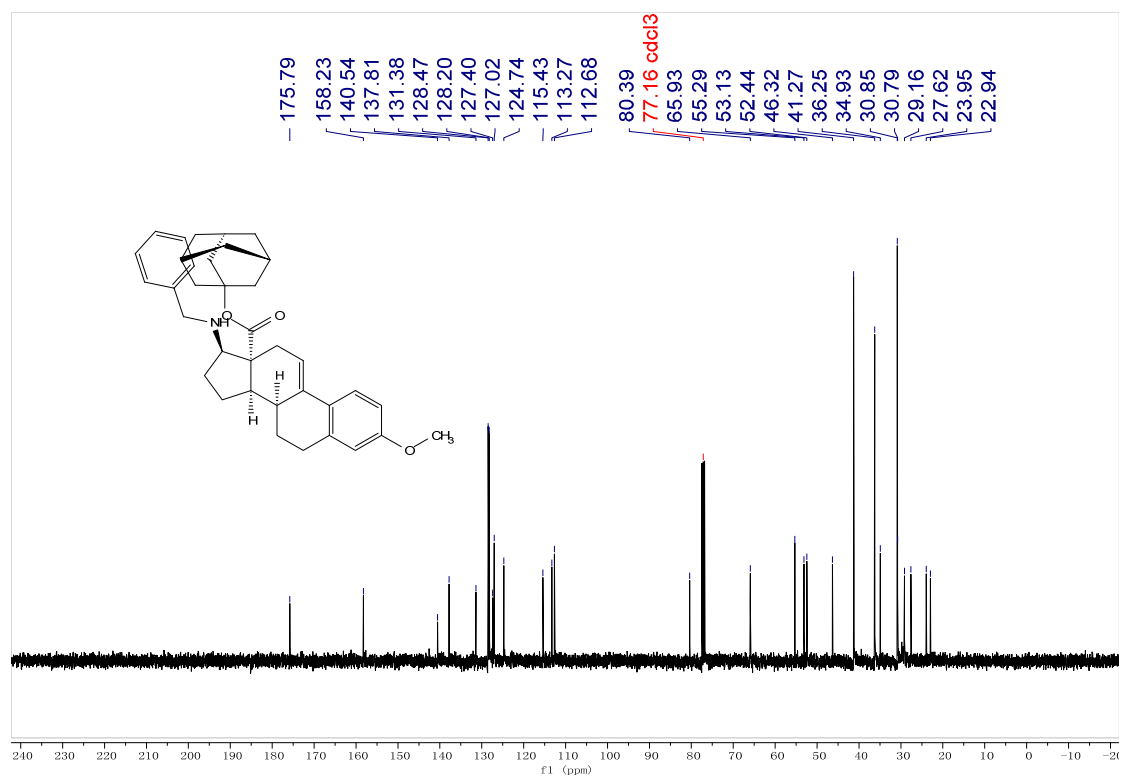

## 10. HPLC data

### HPLC of 3a

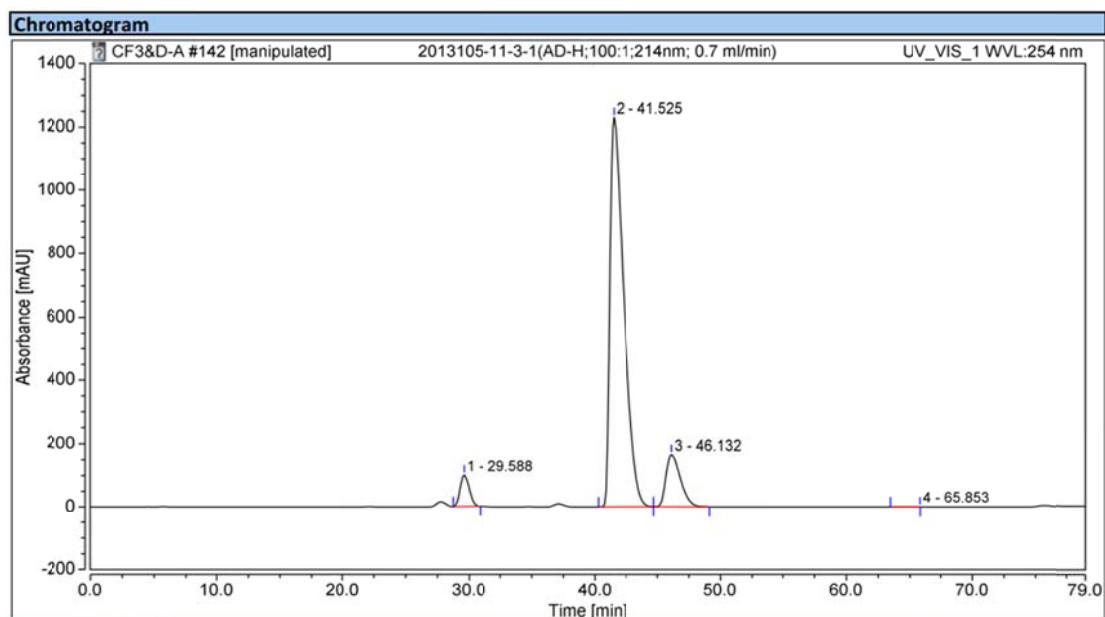

**Integration Results**

| No.           | Peak Name | Retention Time min | Area mAU*min    | Height mAU      | Relative Area % | Relative Height % | Amount mg/l |
|---------------|-----------|--------------------|-----------------|-----------------|-----------------|-------------------|-------------|
| n.a.          | toluene   | n.a.               | n.a.            | n.a.            | n.a.            | n.a.              | n.a.        |
| 1             |           | 29.588             | 82.980          | 99.322          | 4.36            | 6.65              | n.a.        |
| 2             |           | 41.525             | 1601.657        | 1230.031        | 84.13           | 82.32             | n.a.        |
| 3             |           | 46.132             | 219.107         | 164.891         | 11.51           | 11.04             | n.a.        |
| 4             |           | 65.853             | 0.051           | 0.004           | 0.00            | 0.00              | n.a.        |
| <b>Total:</b> |           |                    | <b>1903.795</b> | <b>1494.248</b> | <b>100.00</b>   | <b>100.00</b>     |             |

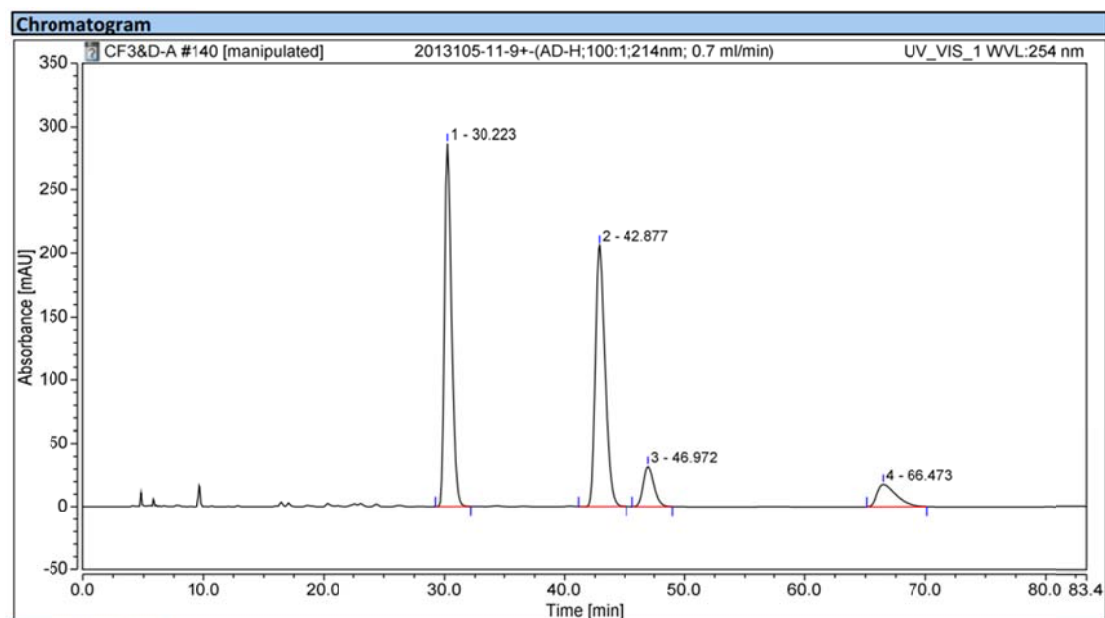

**Integration Results**

| No.           | Peak Name | Retention Time min | Area mAU*min   | Height mAU     | Relative Area % | Relative Height % | Amount mg/l |
|---------------|-----------|--------------------|----------------|----------------|-----------------|-------------------|-------------|
| n.a.          | toluene   | n.a.               | n.a.           | n.a.           | n.a.            | n.a.              | n.a.        |
| 1             |           | 30.223             | 192.944        | 286.822        | 42.80           | 52.89             | n.a.        |
| 2             |           | 42.877             | 192.199        | 205.773        | 42.63           | 37.95             | n.a.        |
| 3             |           | 46.972             | 33.000         | 31.838         | 7.32            | 5.87              | n.a.        |
| 4             |           | 66.473             | 32.672         | 17.822         | 7.25            | 3.29              | n.a.        |
| <b>Total:</b> |           |                    | <b>450.815</b> | <b>542.255</b> | <b>100.00</b>   | <b>100.00</b>     |             |

HPLC of 3b

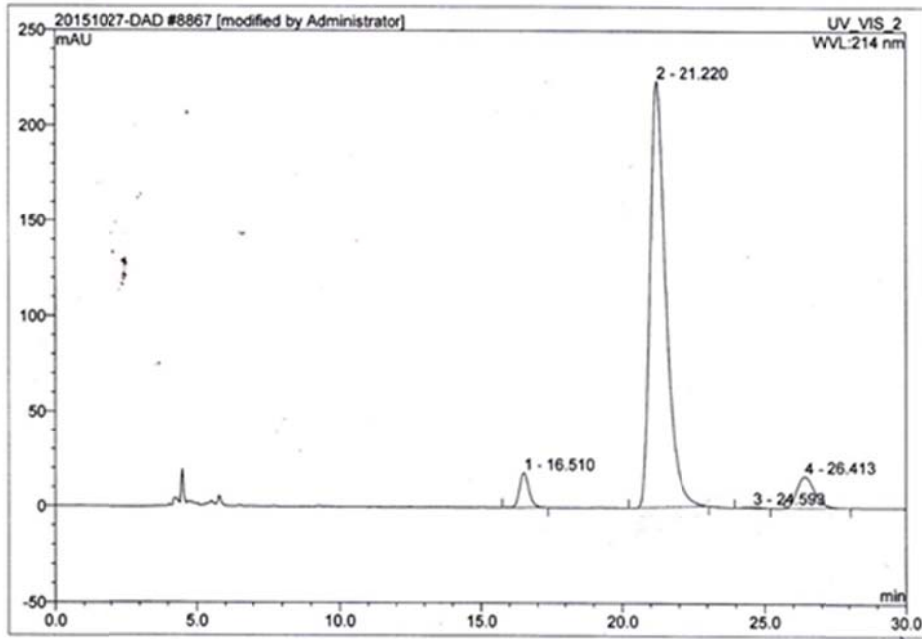

| No.           | Ret.Time min | Peak Name | Height mAU | Area mAU*min | Rel.Area % | Amount | Type |
|---------------|--------------|-----------|------------|--------------|------------|--------|------|
| 1             | 16.51        | n.a.      | 18.293     | 6.985        | 4.27       | n.a.   | BMB* |
| 2             | 21.22        | n.a.      | 223.548    | 144.232      | 88.10      | n.a.   | BMB* |
| 3             | 24.59        | n.a.      | 0.534      | 0.361        | 0.22       | n.a.   | BMB* |
| 4             | 26.41        | n.a.      | 16.725     | 12.135       | 7.41       | n.a.   | BMB* |
| <b>Total:</b> |              |           | 259.099    | 163.713      | 100.00     | 0.000  |      |

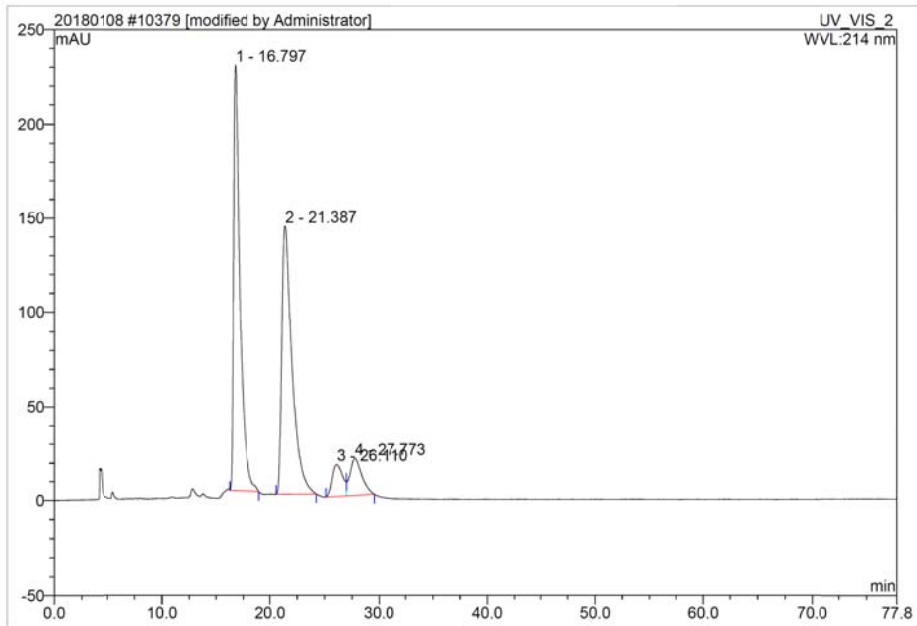

| No.           | Ret.Time min | Peak Name | Height mAU | Area mAU*min | Rel.Area % | Amount | Type |
|---------------|--------------|-----------|------------|--------------|------------|--------|------|
| 1             | 16.80        | n.a.      | 225.936    | 155.764      | 43.90      | n.a.   | BMB* |
| 2             | 21.39        | n.a.      | 142.321    | 155.035      | 43.70      | n.a.   | BMB  |
| 3             | 26.11        | n.a.      | 17.135     | 18.892       | 5.32       | n.a.   | BM   |
| 4             | 27.77        | n.a.      | 19.785     | 25.097       | 7.07       | n.a.   | MB   |
| <b>Total:</b> |              |           | 405.177    | 354.788      | 100.00     | 0.000  |      |

HPLC of 3c

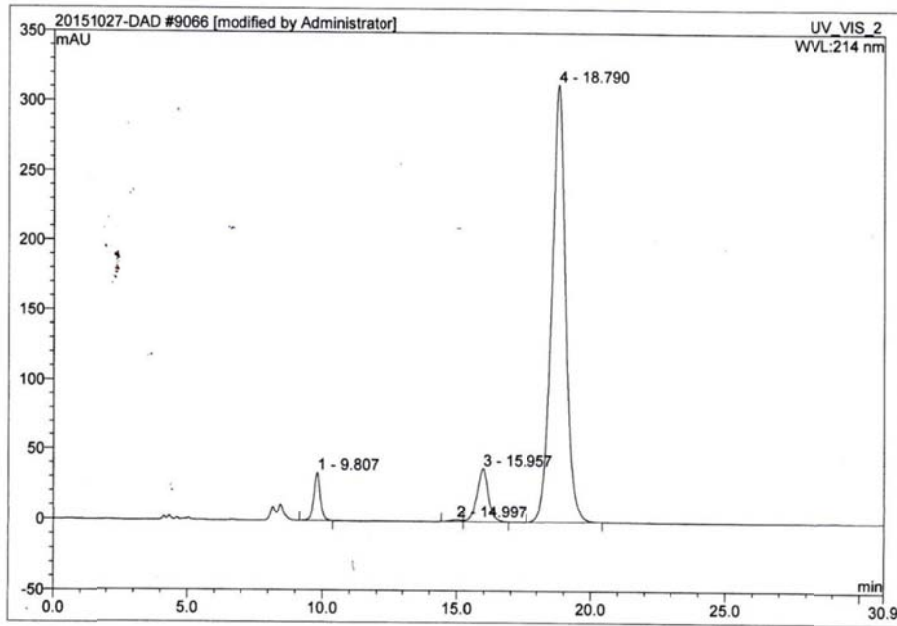

| No.           | Ret.Time min | Peak Name | Height mAU | Area mAU*min | Rel.Area % | Amount | Type |
|---------------|--------------|-----------|------------|--------------|------------|--------|------|
| 1             | 9.81         | n.a.      | 34.591     | 9.605        | 4.43       | n.a.   | BMB* |
| 2             | 15.00        | n.a.      | 1.290      | 0.571        | 0.26       | n.a.   | BM   |
| 3             | 15.96        | n.a.      | 38.187     | 18.759       | 8.65       | n.a.   | MB   |
| 4             | 18.79        | n.a.      | 313.678    | 187.899      | 86.66      | n.a.   | BMB* |
| <b>Total:</b> |              |           | 387.747    | 216.834      | 100.00     | 0.000  |      |

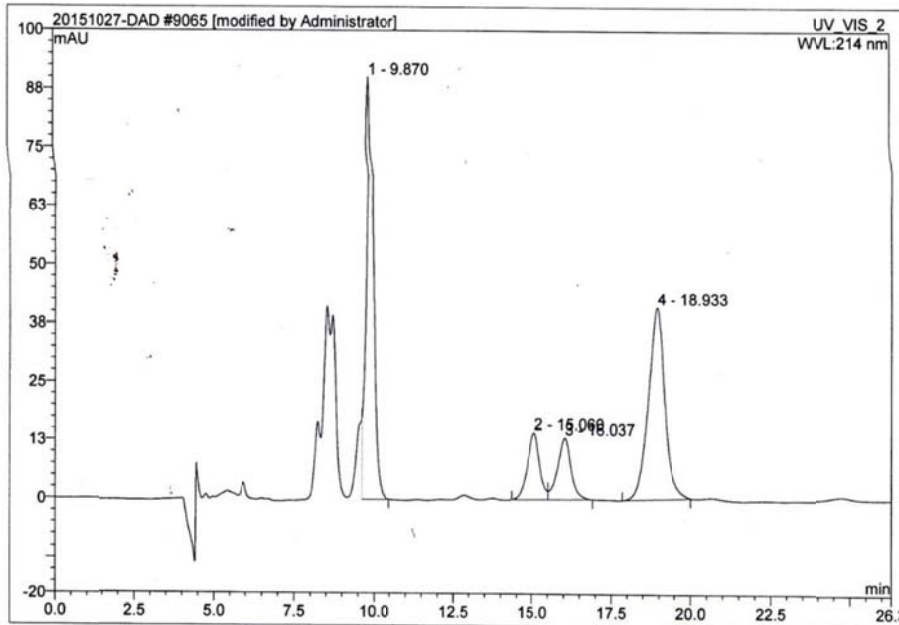

| No.           | Ret.Time min | Peak Name | Height mAU | Area mAU*min | Rel.Area % | Amount | Type |
|---------------|--------------|-----------|------------|--------------|------------|--------|------|
| 1             | 9.87         | n.a.      | 89.906     | 24.497       | 39.49      | n.a.   | MB*  |
| 2             | 15.06        | n.a.      | 14.203     | 6.487        | 10.46      | n.a.   | BM   |
| 3             | 16.04        | n.a.      | 13.164     | 6.502        | 10.48      | n.a.   | MB   |
| 4             | 18.93        | n.a.      | 41.014     | 24.554       | 39.58      | n.a.   | BMB  |
| <b>Total:</b> |              |           | 158.287    | 62.040       | 100.00     | 0.000  |      |

HPLC of 3d

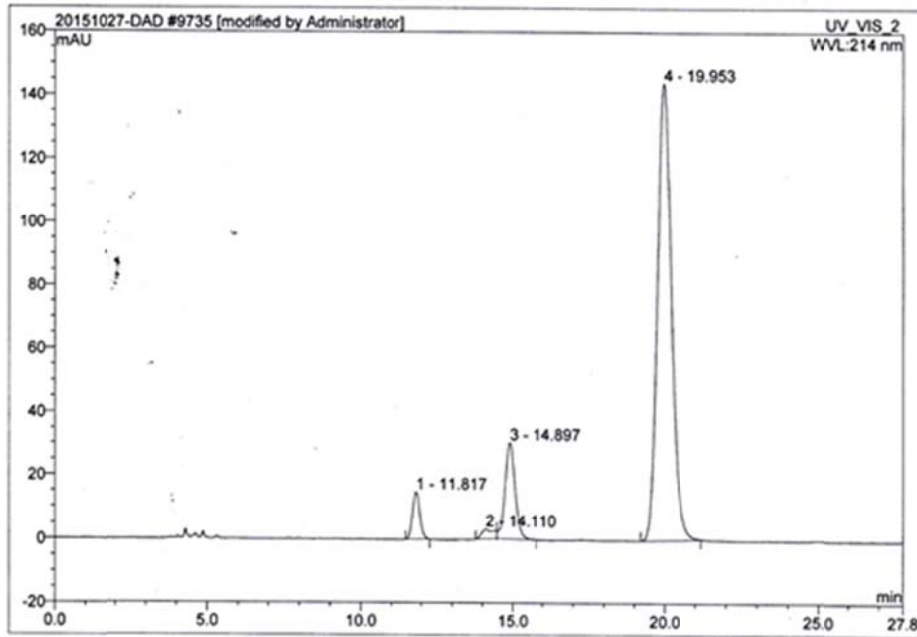

| No.           | Ret.Time min | Peak Name | Height mAU | Area mAU*min | Rel.Area % | Amount | Type |
|---------------|--------------|-----------|------------|--------------|------------|--------|------|
| 1             | 11.82        | n.a.      | 15.000     | 4.138        | 4.40       | n.a.   | BMB  |
| 2             | 14.11        | n.a.      | 3.016      | 1.418        | 1.51       | n.a.   | BM*  |
| 3             | 14.90        | n.a.      | 30.517     | 11.743       | 12.49      | n.a.   | MB*  |
| 4             | 19.95        | n.a.      | 144.195    | 76.732       | 81.60      | n.a.   | BMB  |
| <b>Total:</b> |              |           | 192.728    | 94.033       | 100.00     | 0.000  |      |

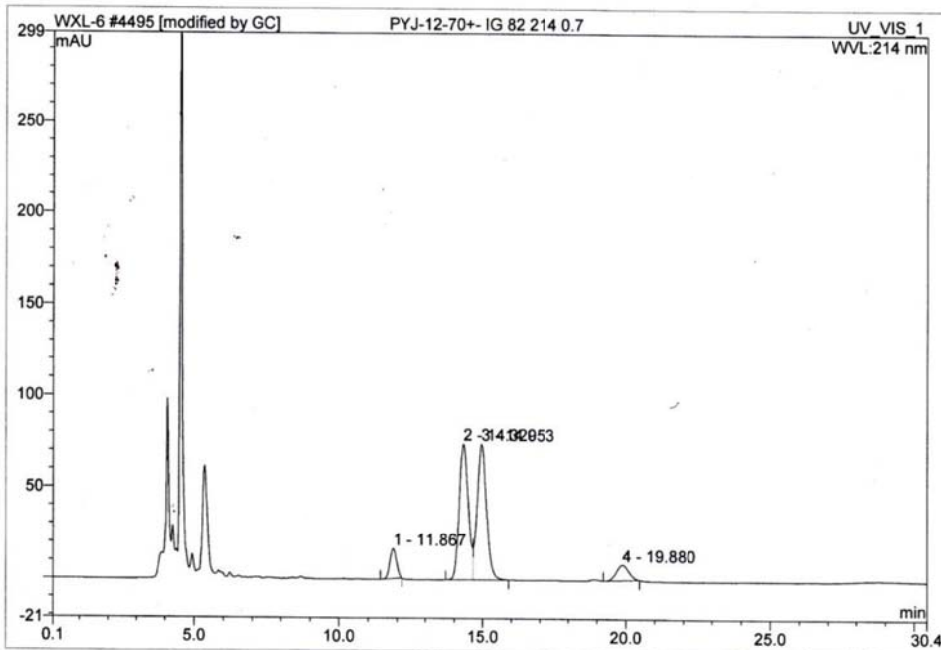

| No.           | Ret.Time min | Peak Name | Height mAU | Area mAU*min | Rel.Area % | Amount | Type |
|---------------|--------------|-----------|------------|--------------|------------|--------|------|
| 1             | 11.87        | n.a.      | 16.451     | 4.398        | 6.78       | n.a.   | BMB* |
| 2             | 14.32        | n.a.      | 74.468     | 27.500       | 42.41      | n.a.   | BM*  |
| 3             | 14.95        | n.a.      | 74.489     | 28.723       | 44.29      | n.a.   | MB*  |
| 4             | 19.88        | n.a.      | 8.519      | 4.230        | 6.52       | n.a.   | BMB* |
| <b>Total:</b> |              |           | 173.926    | 64.851       | 100.00     | 0.000  |      |

## HPLC of 3e

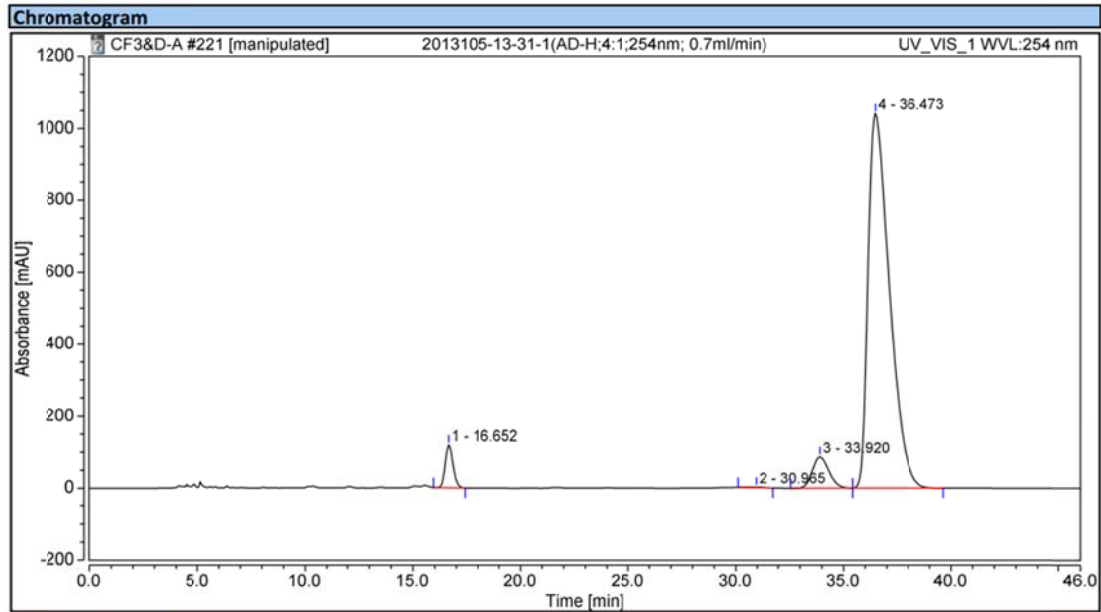

**Integration Results**

| No.           | Peak Name | Retention Time min | Area mAU*min    | Height mAU      | Relative Area % | Relative Height % | Amount mg/l |
|---------------|-----------|--------------------|-----------------|-----------------|-----------------|-------------------|-------------|
| n.a.          | toluene   | n.a.               | n.a.            | n.a.            | n.a.            | n.a.              | n.a.        |
| 1             |           | 16.652             | 49.227          | 118.657         | 3.75            | 9.51              | n.a.        |
| 2             |           | 30.965             | 1.096           | 1.463           | 0.08            | 0.12              | n.a.        |
| 3             |           | 33.920             | 75.843          | 86.712          | 5.78            | 6.95              | n.a.        |
| 4             |           | 36.473             | 1184.904        | 1040.827        | 90.38           | 83.42             | n.a.        |
| <b>Total:</b> |           |                    | <b>1311.070</b> | <b>1247.660</b> | <b>100.00</b>   | <b>100.00</b>     |             |

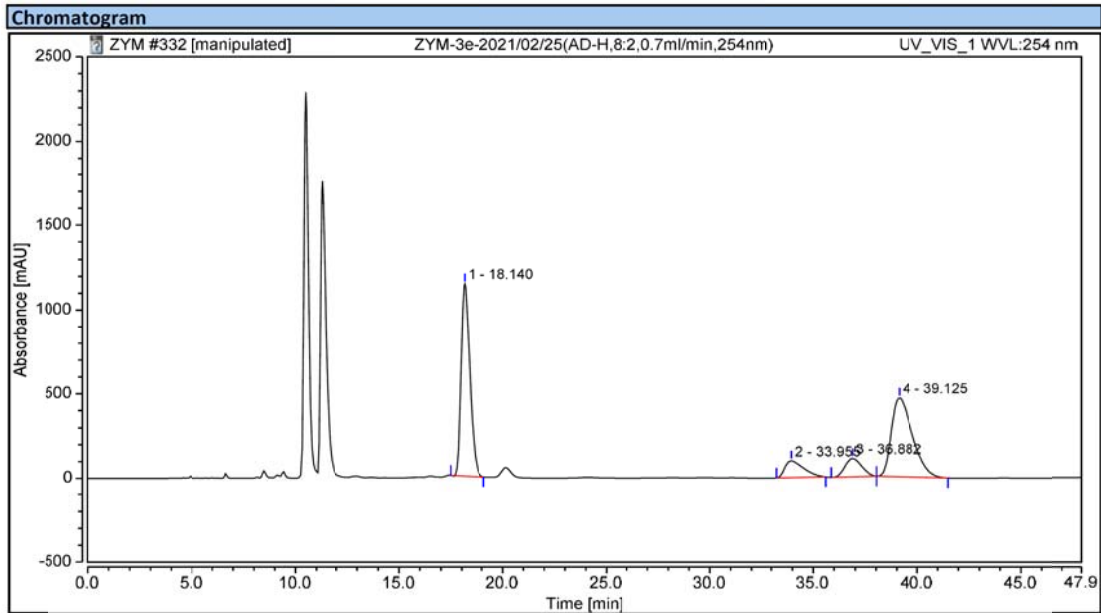

**Integration Results**

| No.           | Peak Name | Retention Time min | Area mAU*min    | Height mAU      | Relative Area % | Relative Height % | Amount n.a. |
|---------------|-----------|--------------------|-----------------|-----------------|-----------------|-------------------|-------------|
| 1             |           | 18.140             | 559.835         | 1144.161        | 42.36           | 62.96             | n.a.        |
| 2             |           | 33.955             | 103.435         | 99.079          | 7.83            | 5.45              | n.a.        |
| 3             |           | 36.882             | 100.134         | 108.797         | 7.58            | 5.99              | n.a.        |
| 4             |           | 39.125             | 558.147         | 465.209         | 42.23           | 25.60             | n.a.        |
| <b>Total:</b> |           |                    | <b>1321.551</b> | <b>1817.245</b> | <b>100.00</b>   | <b>100.00</b>     |             |

HPLC of 3f

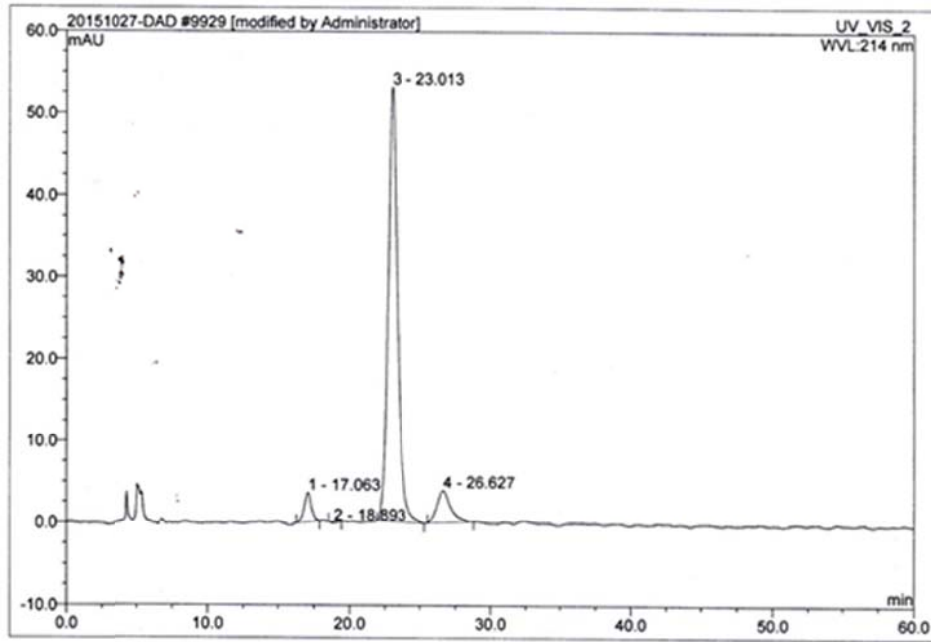

| No.           | Ret.Time min | Peak Name | Height mAU | Area mAU*min | Rel.Area % | Amount | Type |
|---------------|--------------|-----------|------------|--------------|------------|--------|------|
| 1             | 17.06        | n.a.      | 3.638      | 2.099        | 4.34       | n.a.   | BMB* |
| 2             | 18.89        | n.a.      | 0.211      | 0.092        | 0.19       | n.a.   | BMB* |
| 3             | 23.01        | n.a.      | 52.978     | 41.735       | 86.25      | n.a.   | BMB* |
| 4             | 26.63        | n.a.      | 4.000      | 4.460        | 9.22       | n.a.   | BMB* |
| <b>Total:</b> |              |           | 60.827     | 48.387       | 100.00     | 0.000  |      |

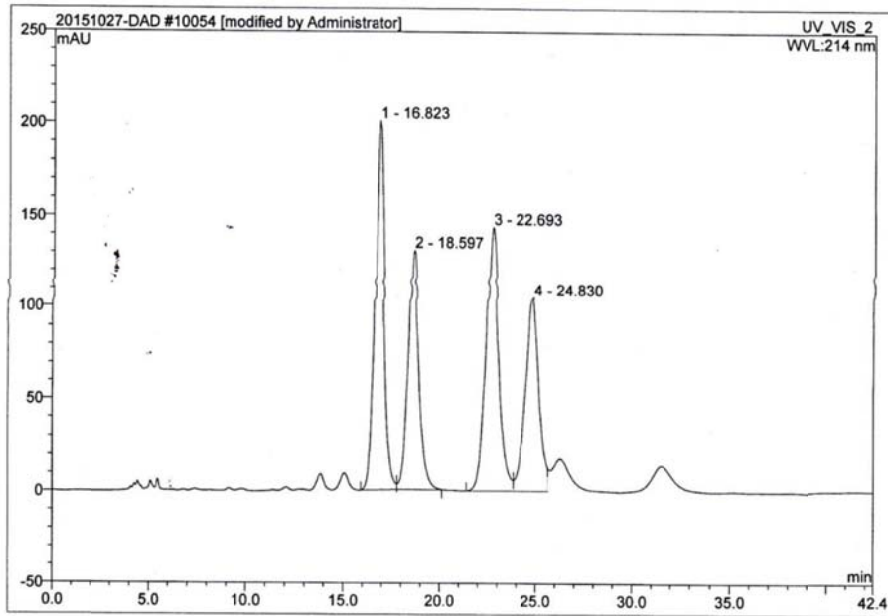

| No.           | Ret.Time min | Peak Name | Height mAU | Area mAU*min | Rel.Area % | Amount | Type |
|---------------|--------------|-----------|------------|--------------|------------|--------|------|
| 1             | 16.82        | n.a.      | 200.807    | 110.954      | 28.29      | n.a.   | BM * |
| 2             | 18.60        | n.a.      | 130.134    | 84.646       | 21.58      | n.a.   | MB*  |
| 3             | 22.69        | n.a.      | 143.598    | 111.036      | 28.31      | n.a.   | BM * |
| 4             | 24.83        | n.a.      | 105.343    | 85.562       | 21.82      | n.a.   | M *  |
| <b>Total:</b> |              |           | 579.882    | 392.198      | 100.00     | 0.000  |      |

# HPLC of 3g

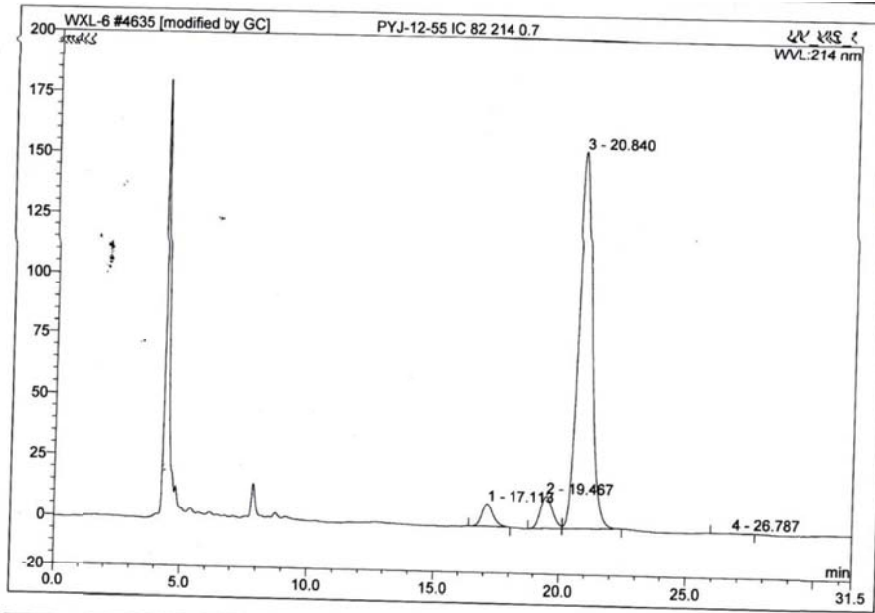

| No.           | Ret.Time min | Peak Name | Height mAU | Area mAU*min | Rel.Area % | Amount | Type |
|---------------|--------------|-----------|------------|--------------|------------|--------|------|
| 1             | 17.11        | n.a.      | 9.299      | 4.820        | 4.42       | n.a.   | BMB* |
| 2             | 19.47        | n.a.      | 13.419     | 7.519        | 6.90       | n.a.   | BM * |
| 3             | 20.84        | n.a.      | 155.792    | 96.460       | 88.51      | n.a.   | MB*  |
| 4             | 26.79        | n.a.      | 0.182      | 0.178        | 0.16       | n.a.   | BMB* |
| <b>Total:</b> |              |           | 178.691    | 108.977      | 100.00     | 0.000  |      |

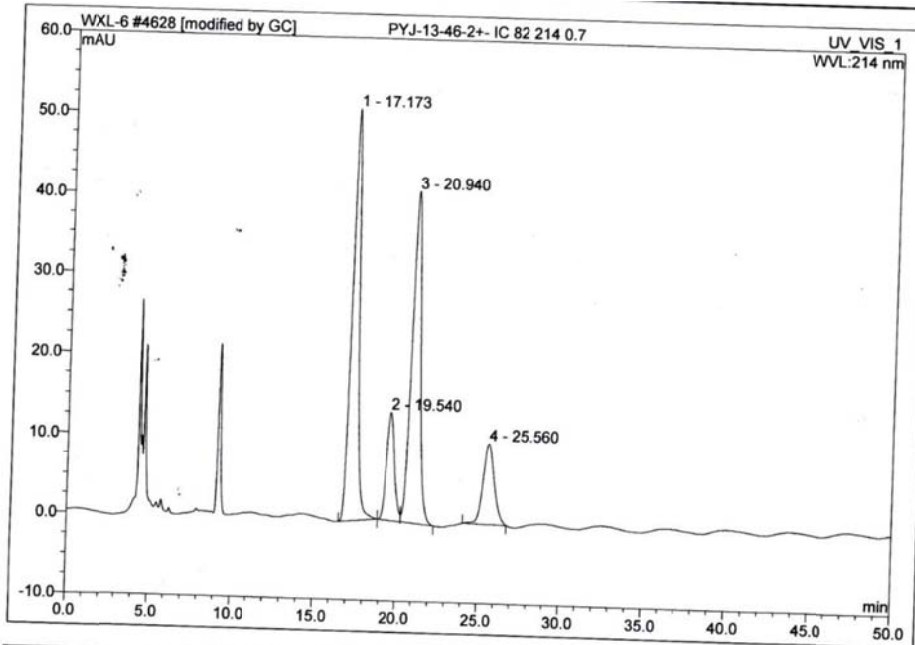

| No.           | Ret.Time min | Peak Name | Height mAU | Area mAU*min | Rel.Area % | Amount | Type |
|---------------|--------------|-----------|------------|--------------|------------|--------|------|
| 1             | 17.17        | n.a.      | 51.177     | 26.540       | 39.04      | n.a.   | BMB* |
| 2             | 19.54        | n.a.      | 13.413     | 7.731        | 11.37      | n.a.   | BM   |
| 3             | 20.94        | n.a.      | 41.219     | 25.744       | 37.87      | n.a.   | MB*  |
| 4             | 25.56        | n.a.      | 9.995      | 7.964        | 11.72      | n.a.   | BMB* |
| <b>Total:</b> |              |           | 115.805    | 67.979       | 100.00     | 0.000  |      |



HPLC of 3h

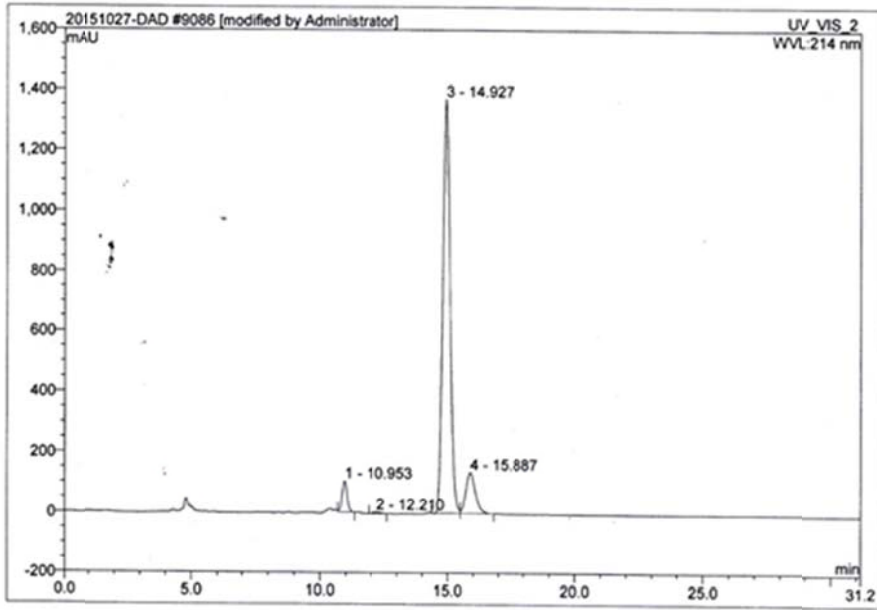

| No.           | Ret.Time min | Peak Name | Height mAU | Area mAU*min | Rel.Area % | Amount | Type |
|---------------|--------------|-----------|------------|--------------|------------|--------|------|
| 1             | 10.95        | n.a.      | 105.337    | 23.888       | 4.41       | n.a.   | MB*  |
| 2             | 12.21        | n.a.      | 3.904      | 1.510        | 0.28       | n.a.   | BMB* |
| 3             | 14.93        | n.a.      | 1373.411   | 457.792      | 84.57      | n.a.   | BM * |
| 4             | 15.89        | n.a.      | 136.380    | 58.140       | 10.74      | n.a.   | MB*  |
| <b>Total:</b> |              |           | 1619.032   | 541.330      | 100.00     | 0.000  |      |

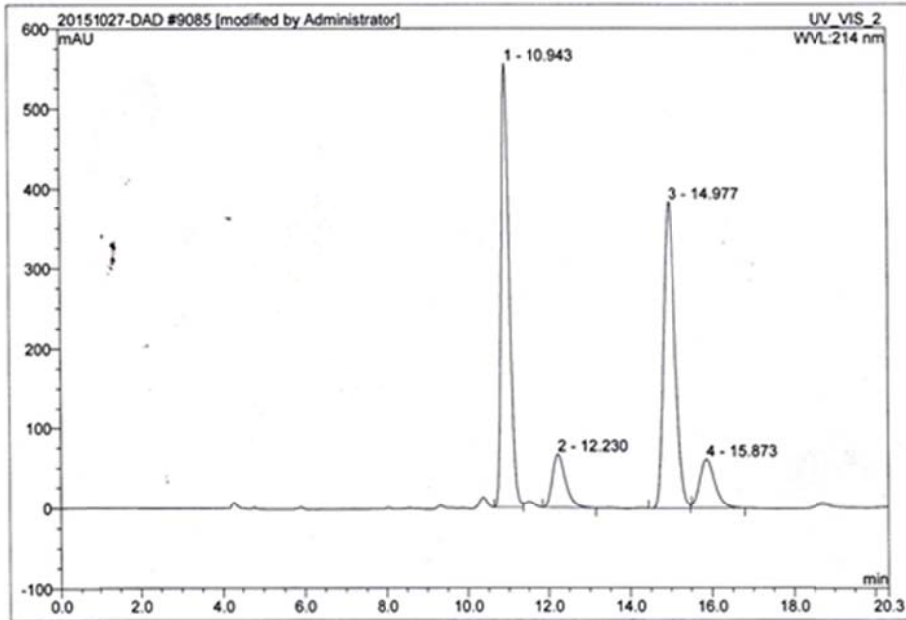

| No.           | Ret.Time min | Peak Name | Height mAU | Area mAU*min | Rel.Area % | Amount | Type |
|---------------|--------------|-----------|------------|--------------|------------|--------|------|
| 1             | 10.94        | n.a.      | 555.458    | 127.009      | 41.59      | n.a.   | BM * |
| 2             | 12.23        | n.a.      | 67.242     | 25.062       | 8.21       | n.a.   | BMB* |
| 3             | 14.98        | n.a.      | 383.213    | 126.879      | 41.55      | n.a.   | BM * |
| 4             | 15.87        | n.a.      | 61.671     | 26.406       | 8.65       | n.a.   | MB*  |
| <b>Total:</b> |              |           | 1067.583   | 305.355      | 100.00     | 0.000  |      |

HPLC of 3i

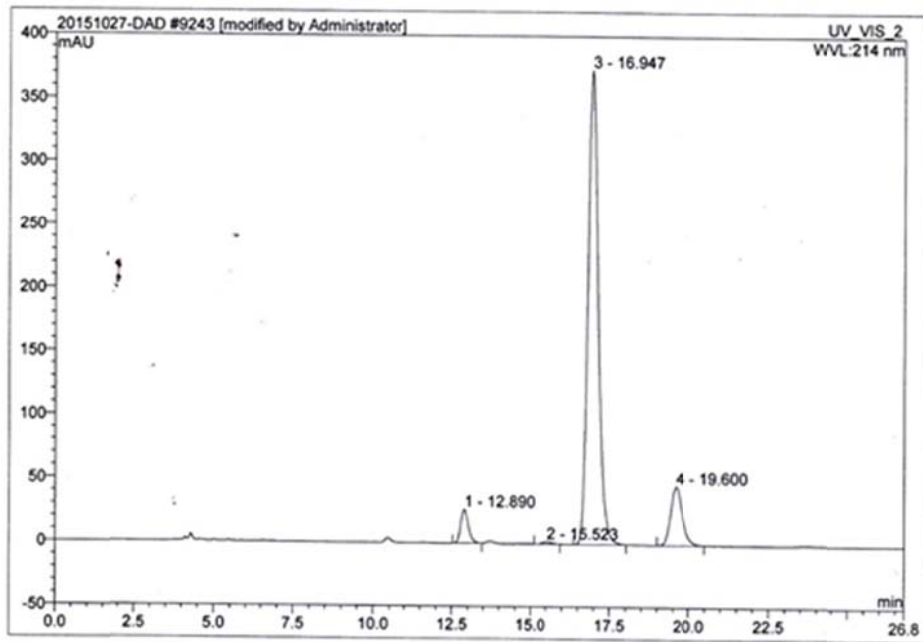

| No.           | Ret.Time min | Peak Name | Height mAU | Area mAU*min | Rel.Area % | Amount | Type |
|---------------|--------------|-----------|------------|--------------|------------|--------|------|
| 1             | 12.89        | n.a.      | 27.307     | 7.543        | 4.46       | n.a.   | BMB* |
| 2             | 15.52        | n.a.      | 1.692      | 0.556        | 0.33       | n.a.   | BMB* |
| 3             | 16.95        | n.a.      | 374.290    | 140.684      | 83.13      | n.a.   | BMB  |
| 4             | 19.60        | n.a.      | 47.142     | 20.442       | 12.08      | n.a.   | BMB  |
| <b>Total:</b> |              |           | 450.430    | 169.225      | 100.00     | 0.000  |      |

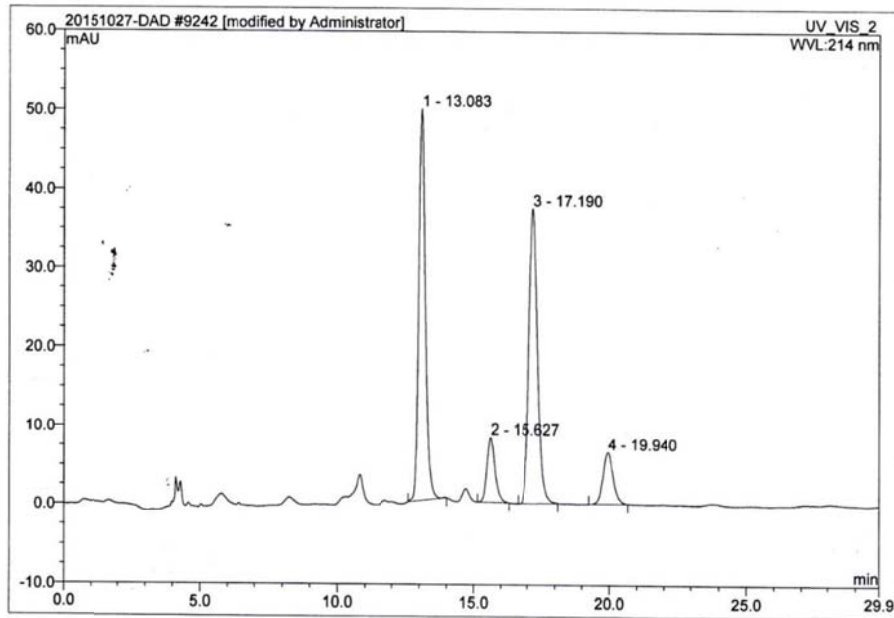

| No.           | Ret.Time min | Peak Name | Height mAU | Area mAU*min | Rel.Area % | Amount | Type |
|---------------|--------------|-----------|------------|--------------|------------|--------|------|
| 1             | 13.08        | n.a.      | 49.621     | 13.944       | 41.68      | n.a.   | BMB* |
| 2             | 15.63        | n.a.      | 8.251      | 2.847        | 8.51       | n.a.   | BMB* |
| 3             | 17.19        | n.a.      | 37.351     | 13.812       | 41.28      | n.a.   | BMB* |
| 4             | 19.94        | n.a.      | 6.634      | 2.852        | 8.53       | n.a.   | BMB* |
| <b>Total:</b> |              |           | 101.856    | 33.456       | 100.00     | 0.000  |      |

# HPLC of 3j

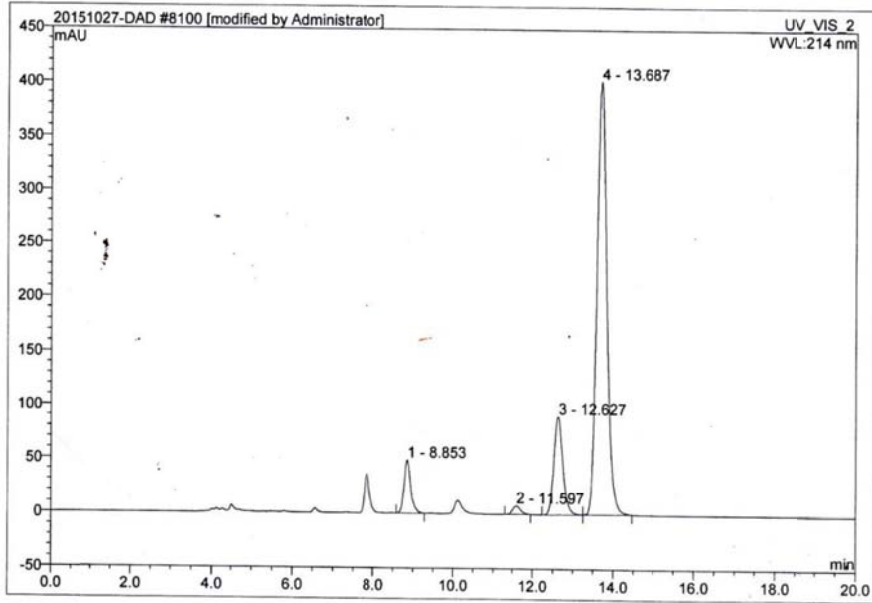

| No.           | Ret.Time min | Peak Name | Height mAU | Area mAU*min | Rel.Area % | Amount | Type |
|---------------|--------------|-----------|------------|--------------|------------|--------|------|
| 1             | 8.85         | n.a.      | 49.588     | 9.471        | 6.33       | n.a.   | BMB  |
| 2             | 11.60        | n.a.      | 7.762      | 1.808        | 1.21       | n.a.   | BMB  |
| 3             | 12.63        | n.a.      | 91.193     | 23.727       | 15.87      | n.a.   | BM   |
| 4             | 13.69        | n.a.      | 402.321    | 114.534      | 76.59      | n.a.   | MB   |
| <b>Total:</b> |              |           | 550.864    | 149.540      | 100.00     | 0.000  |      |

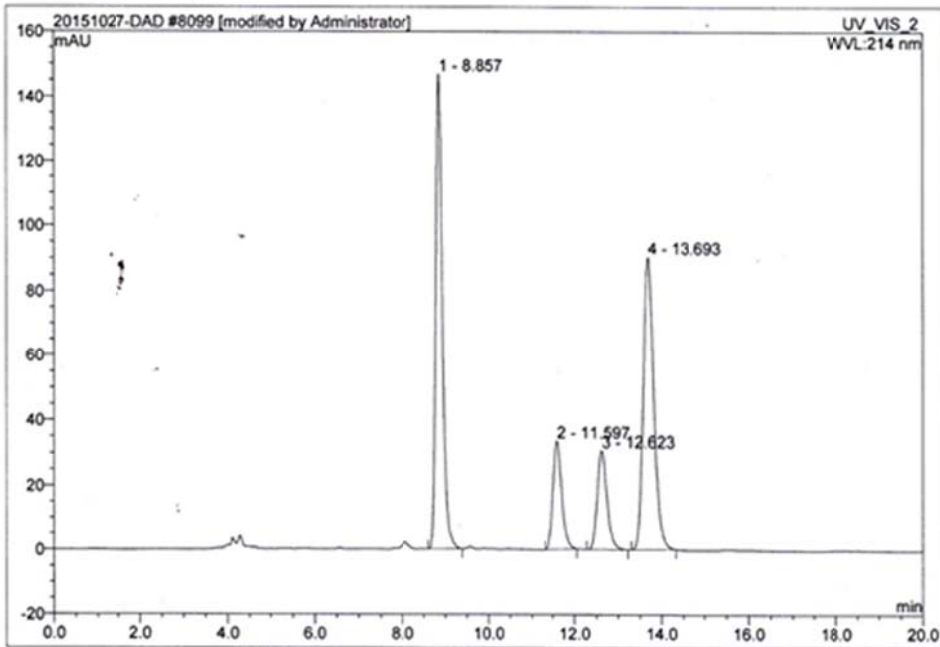

| No.           | Ret.Time min | Peak Name | Height mAU | Area mAU*min | Rel.Area % | Amount | Type |
|---------------|--------------|-----------|------------|--------------|------------|--------|------|
| 1             | 8.86         | n.a.      | 146.634    | 25.800       | 38.33      | n.a.   | BMB  |
| 2             | 11.60        | n.a.      | 33.480     | 7.932        | 11.78      | n.a.   | BMB  |
| 3             | 12.62        | n.a.      | 30.796     | 8.022        | 11.92      | n.a.   | BMB  |
| 4             | 13.69        | n.a.      | 90.337     | 25.563       | 37.97      | n.a.   | BMB  |
| <b>Total:</b> |              |           | 301.247    | 67.317       | 100.00     | 0.000  |      |

HPLC of 3k

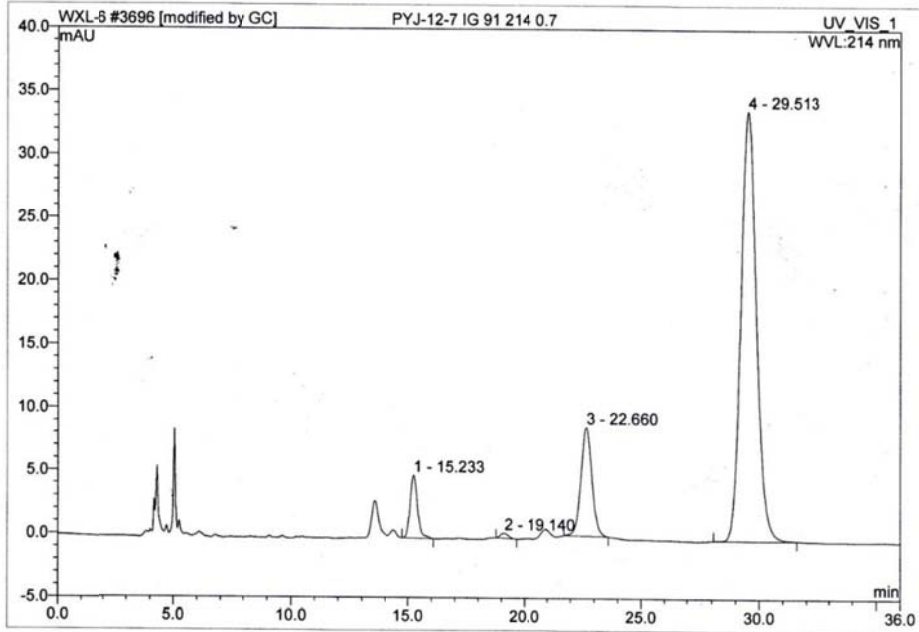

| No.           | Ret.Time<br>min | Peak Name | Height<br>mAU | Area<br>mAU*min | Rel.Area<br>% | Amount | Type |
|---------------|-----------------|-----------|---------------|-----------------|---------------|--------|------|
| 1             | 15.23           | n.a.      | 5.046         | 1.842           | 5.67          | n.a.   | BMB* |
| 2             | 19.14           | n.a.      | 0.390         | 0.152           | 0.47          | n.a.   | BMB* |
| 3             | 22.66           | n.a.      | 8.665         | 4.754           | 14.63         | n.a.   | BMB* |
| 4             | 29.51           | n.a.      | 34.100        | 25.749          | 79.24         | n.a.   | BMB* |
| <b>Total:</b> |                 |           | 48.200        | 32.497          | 100.00        | 0.000  |      |

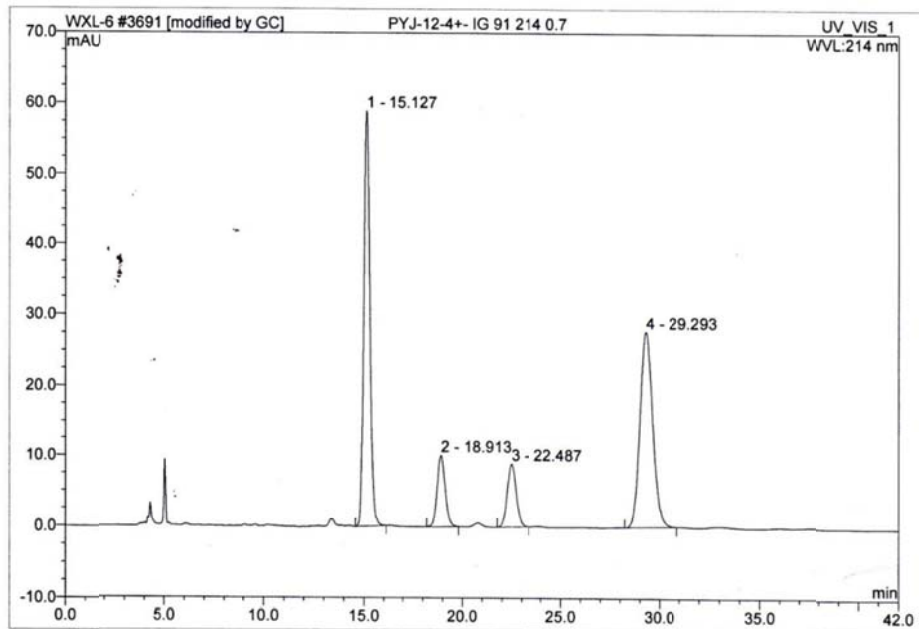

| No.           | Ret.Time<br>min | Peak Name | Height<br>mAU | Area<br>mAU*min | Rel.Area<br>% | Amount | Type |
|---------------|-----------------|-----------|---------------|-----------------|---------------|--------|------|
| 1             | 15.13           | n.a.      | 59.022        | 20.807          | 40.75         | n.a.   | BMB* |
| 2             | 18.91           | n.a.      | 10.248        | 4.800           | 9.40          | n.a.   | BMB* |
| 3             | 22.49           | n.a.      | 9.073         | 4.780           | 9.36          | n.a.   | BMB* |
| 4             | 29.29           | n.a.      | 27.844        | 20.672          | 40.49         | n.a.   | BMB* |
| <b>Total:</b> |                 |           | 106.187       | 51.059          | 100.00        | 0.000  |      |

HPLC of 3I

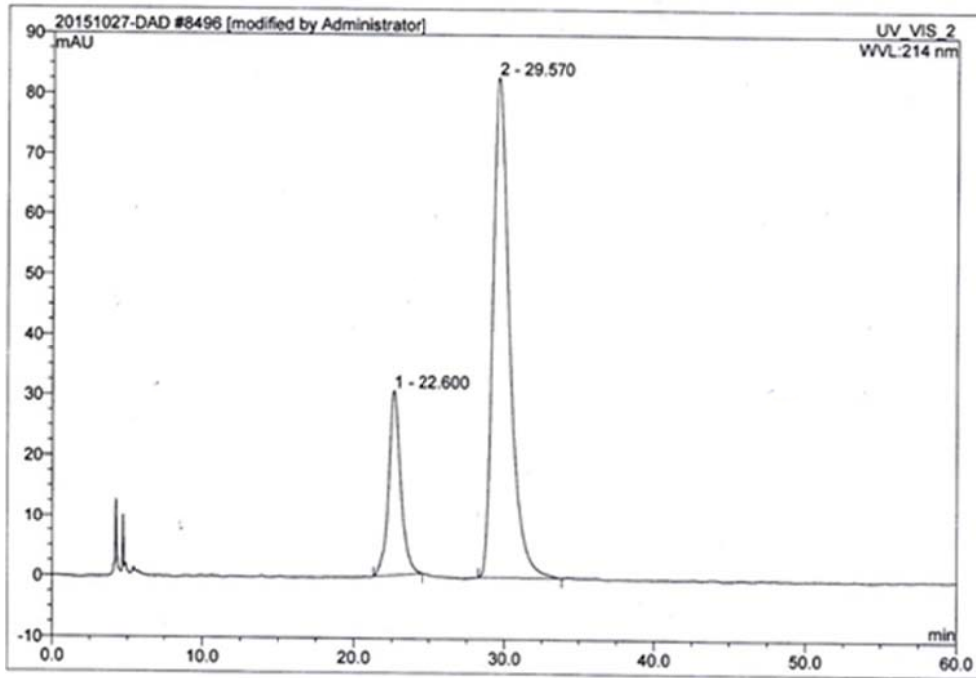

| No.           | Ret.Time min | Peak Name | Height mAU | Area mAU*min | Rel.Area % | Amount | Type |
|---------------|--------------|-----------|------------|--------------|------------|--------|------|
| 1             | 22.60        | n.a.      | 30.544     | 28.117       | 20.64      | n.a.   | BMB* |
| 2             | 29.57        | n.a.      | 82.832     | 108.091      | 79.36      | n.a.   | BMB* |
| <b>Total:</b> |              |           | 113.376    | 136.208      | 100.00     | 0.000  |      |

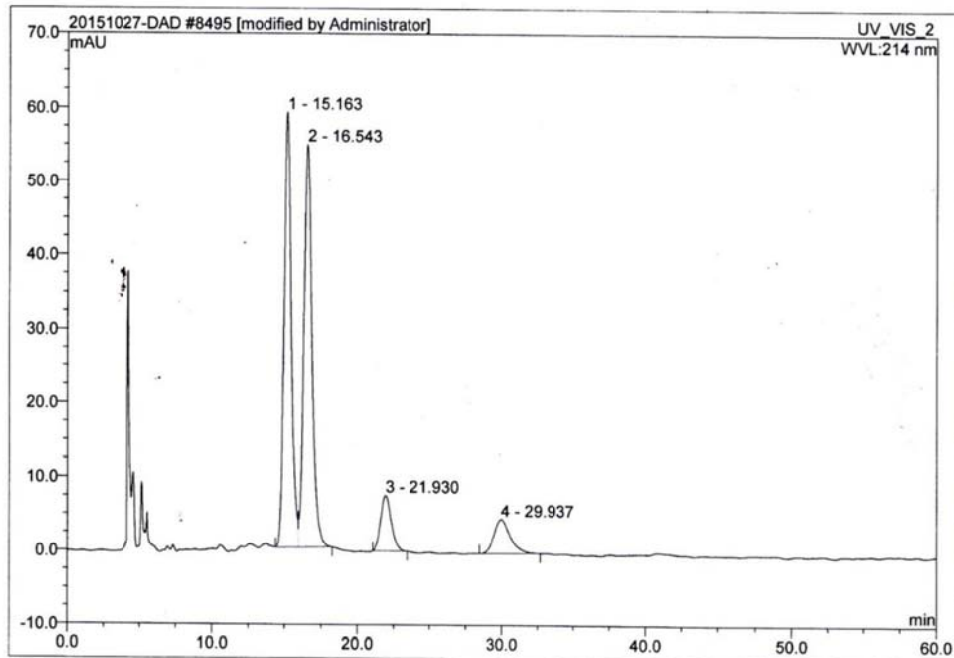

| No.           | Ret.Time min | Peak Name | Height mAU | Area mAU*min | Rel.Area % | Amount | Type |
|---------------|--------------|-----------|------------|--------------|------------|--------|------|
| 1             | 15.16        | n.a.      | 58.951     | 33.623       | 41.40      | n.a.   | BM * |
| 2             | 16.54        | n.a.      | 54.523     | 35.072       | 43.18      | n.a.   | MB*  |
| 3             | 21.93        | n.a.      | 7.604      | 6.465        | 7.96       | n.a.   | BMB* |
| 4             | 29.94        | n.a.      | 4.630      | 6.057        | 7.46       | n.a.   | BMB* |
| <b>Total:</b> |              |           | 125.708    | 81.218       | 100.00     | 0.000  |      |

# HPLC of 3m

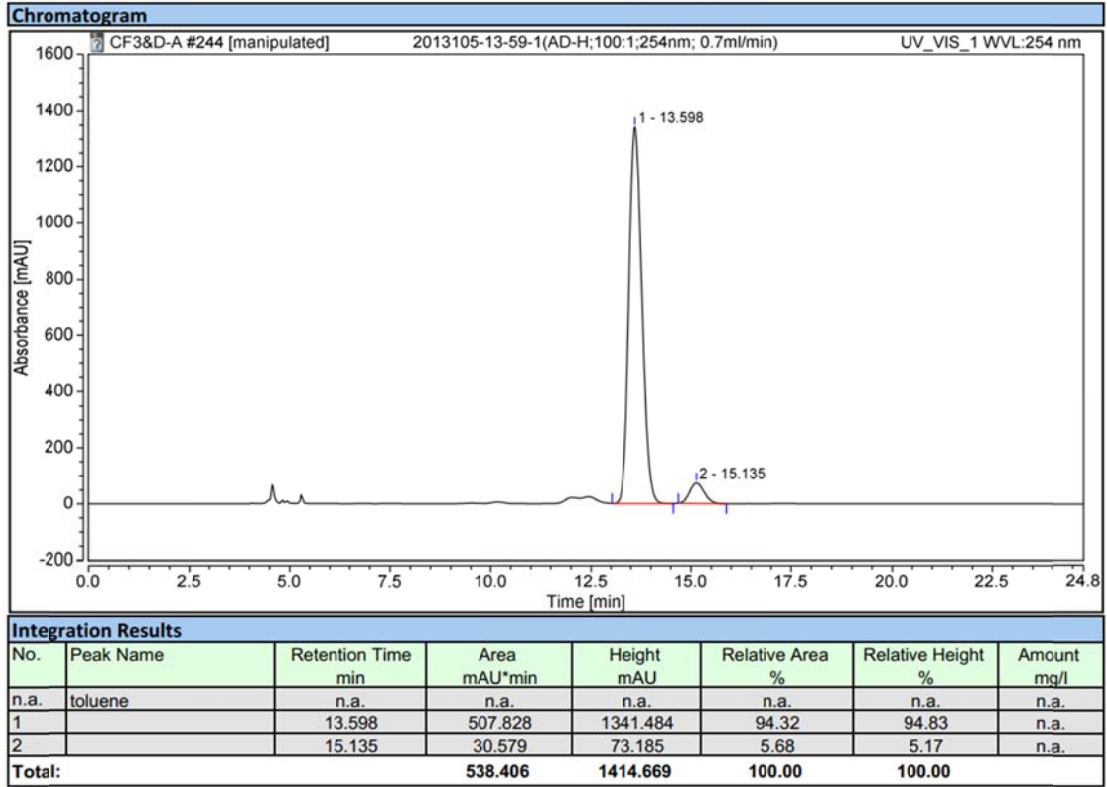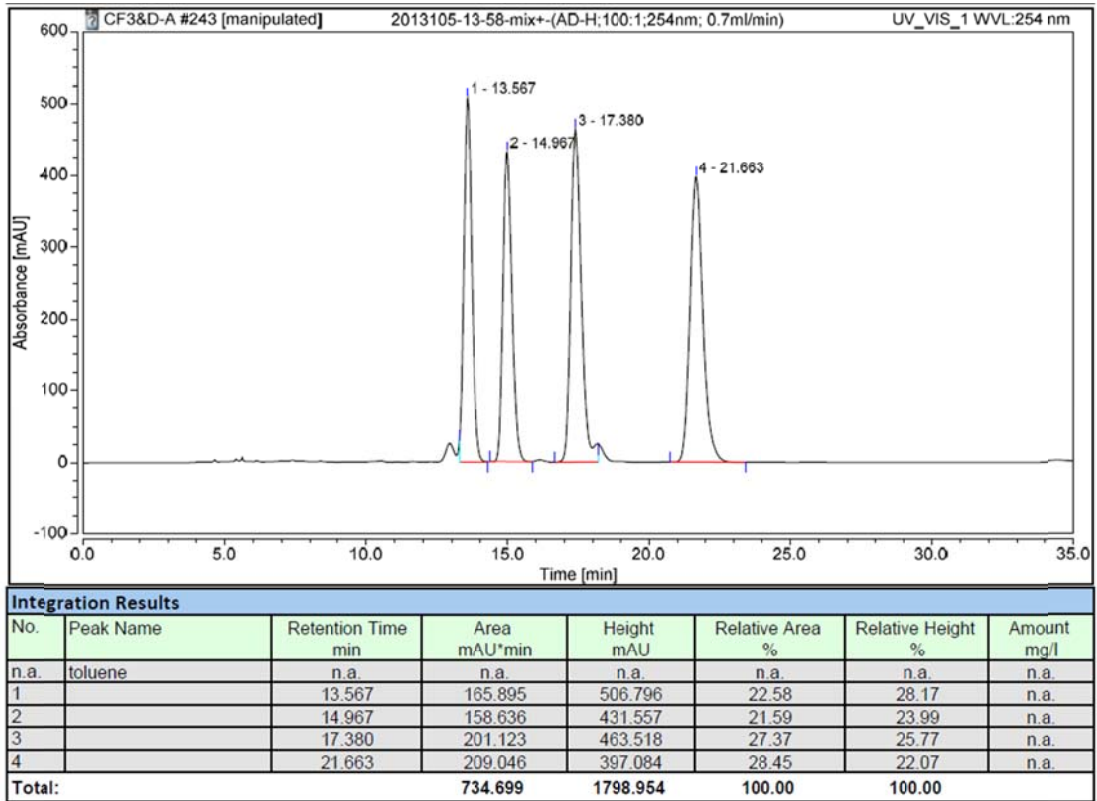

# HPLC of 3n

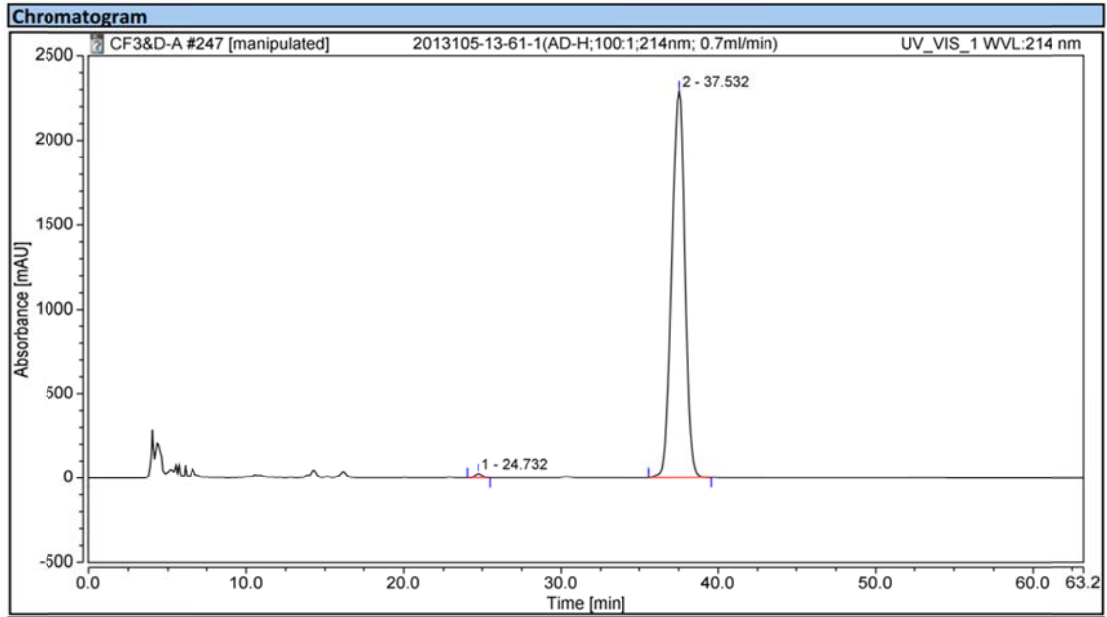

**Integration Results**

| No.           | Peak Name | Retention Time min | Area mAU*min    | Height mAU      | Relative Area % | Relative Height % | Amount mg/l |
|---------------|-----------|--------------------|-----------------|-----------------|-----------------|-------------------|-------------|
| n.a.          | toluene   | n.a.               | n.a.            | n.a.            | n.a.            | n.a.              | n.a.        |
| 1             |           | 24.732             | 12.866          | 23.700          | 0.58            | 1.02              | n.a.        |
| 2             |           | 37.532             | 2211.129        | 2290.646        | 99.42           | 98.98             | n.a.        |
| <b>Total:</b> |           |                    | <b>2223.996</b> | <b>2314.346</b> | <b>100.00</b>   | <b>100.00</b>     |             |

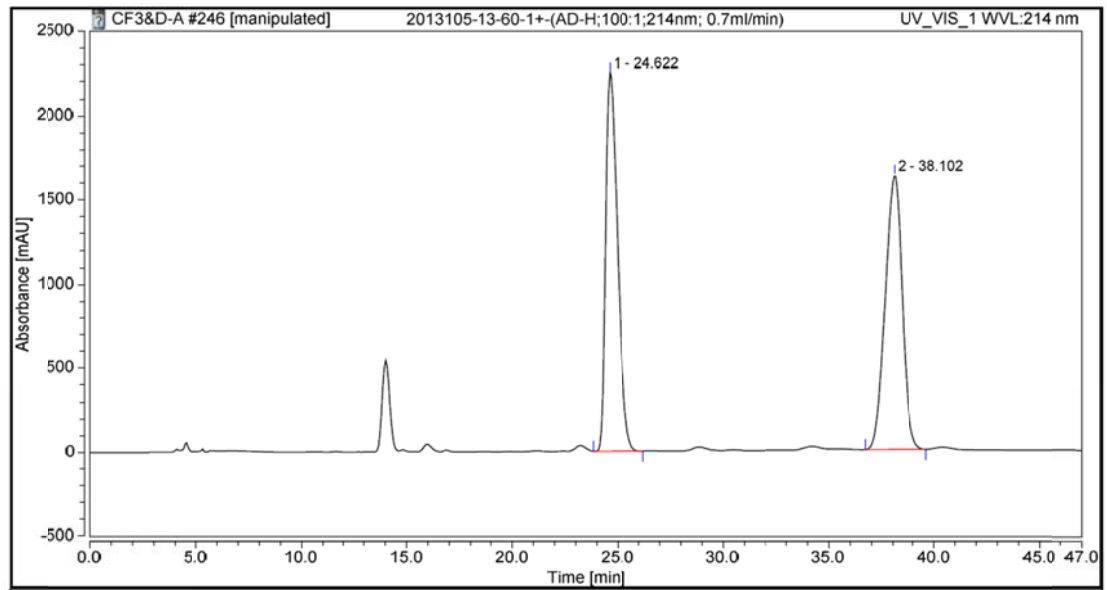

**Integration Results**

| No.           | Peak Name | Retention Time min | Area mAU*min    | Height mAU      | Relative Area % | Relative Height % | Amount mg/l |
|---------------|-----------|--------------------|-----------------|-----------------|-----------------|-------------------|-------------|
| n.a.          | toluene   | n.a.               | n.a.            | n.a.            | n.a.            | n.a.              | n.a.        |
| 1             |           | 24.622             | 1487.305        | 2248.167        | 49.39           | 58.00             | n.a.        |
| 2             |           | 38.102             | 1523.997        | 1628.085        | 50.61           | 42.00             | n.a.        |
| <b>Total:</b> |           |                    | <b>3011.302</b> | <b>3876.252</b> | <b>100.00</b>   | <b>100.00</b>     |             |

# HPLC of 3o

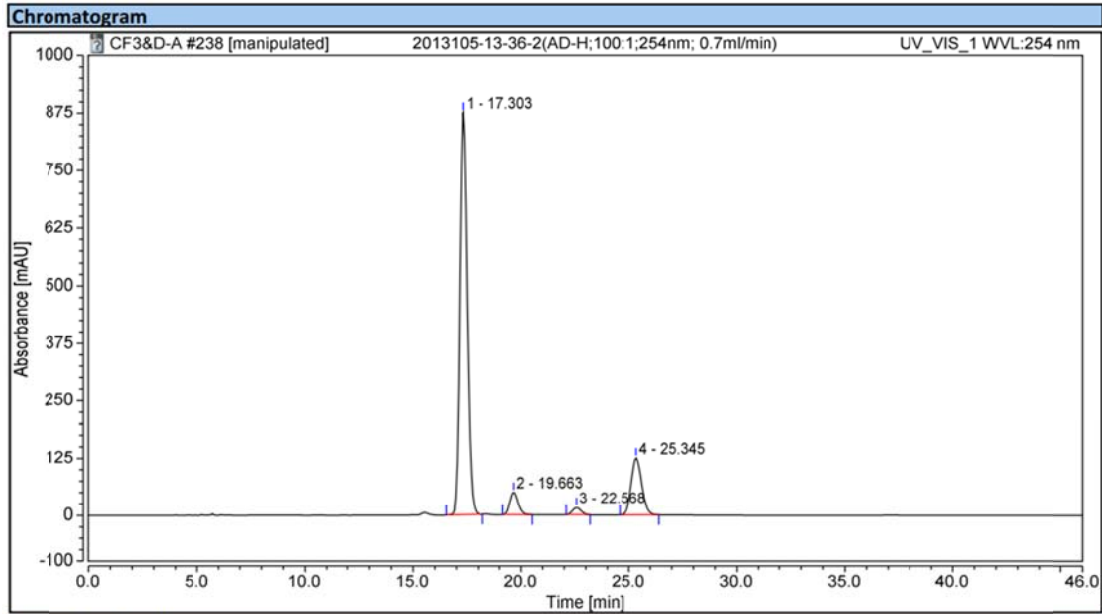

**Integration Results**

| No.           | Peak Name | Retention Time min | Area mAU*min   | Height mAU      | Relative Area % | Relative Height % | Amount mg/l |
|---------------|-----------|--------------------|----------------|-----------------|-----------------|-------------------|-------------|
| n.a.          | toluene   | n.a.               | n.a.           | n.a.            | n.a.            | n.a.              | n.a.        |
| 1             |           | 17.303             | 337.410        | 875.180         | 77.22           | 82.26             | n.a.        |
| 2             |           | 19.663             | 21.613         | 48.631          | 4.95            | 4.57              | n.a.        |
| 3             |           | 22.568             | 7.335          | 15.485          | 1.68            | 1.46              | n.a.        |
| 4             |           | 25.345             | 70.616         | 124.617         | 16.16           | 11.71             | n.a.        |
| <b>Total:</b> |           |                    | <b>436.973</b> | <b>1063.913</b> | <b>100.00</b>   | <b>100.00</b>     |             |

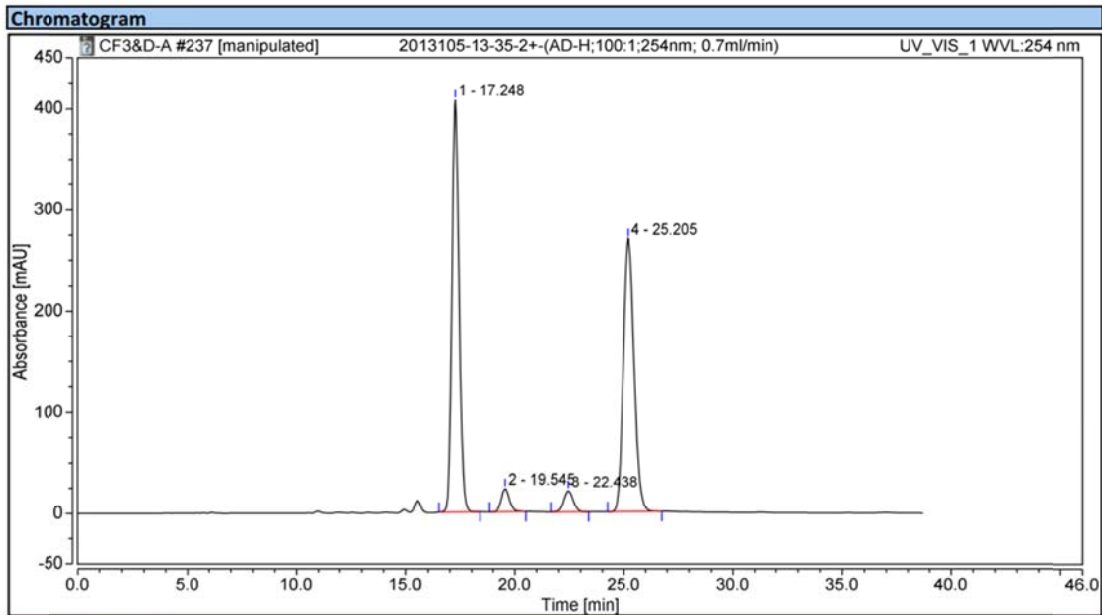

**Integration Results**

| No.           | Peak Name | Retention Time min | Area mAU*min   | Height mAU     | Relative Area % | Relative Height % | Amount mg/l |
|---------------|-----------|--------------------|----------------|----------------|-----------------|-------------------|-------------|
| n.a.          | toluene   | n.a.               | n.a.           | n.a.           | n.a.            | n.a.              | n.a.        |
| 1             |           | 17.248             | 154.595        | 407.433        | 46.98           | 56.50             | n.a.        |
| 2             |           | 19.545             | 10.152         | 23.017         | 3.09            | 3.19              | n.a.        |
| 3             |           | 22.438             | 10.451         | 20.977         | 3.18            | 2.91              | n.a.        |
| 4             |           | 25.205             | 153.857        | 269.736        | 46.76           | 37.40             | n.a.        |
| <b>Total:</b> |           |                    | <b>329.055</b> | <b>721.164</b> | <b>100.00</b>   | <b>100.00</b>     |             |



# HPLC of 3p

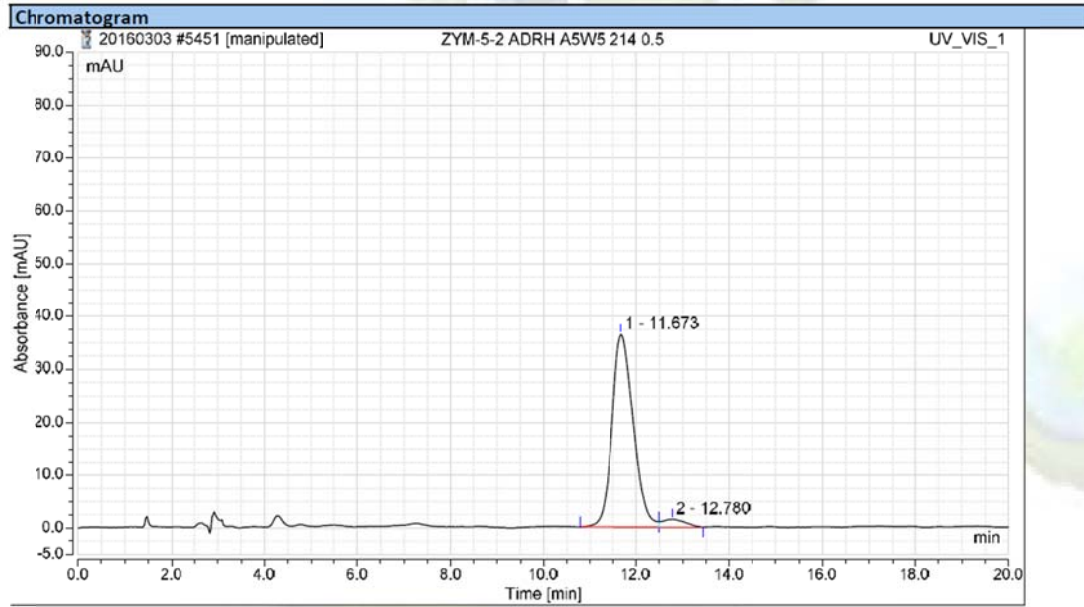

| Integration Results |                       |                 |                 |                    |
|---------------------|-----------------------|-----------------|-----------------|--------------------|
| No.                 | Retention Time<br>min | Area<br>mAU*min | Height<br>mAU   | Relative Area<br>% |
| 1                   | 11.673                | 19.4920         | 36.4224         | 95.981             |
| 2                   | 12.780                | 0.8161          | 1.4592          | 4.019              |
| <b>Total:</b>       |                       | <b>20.308</b>   | <b>1401.998</b> | <b>100.000</b>     |

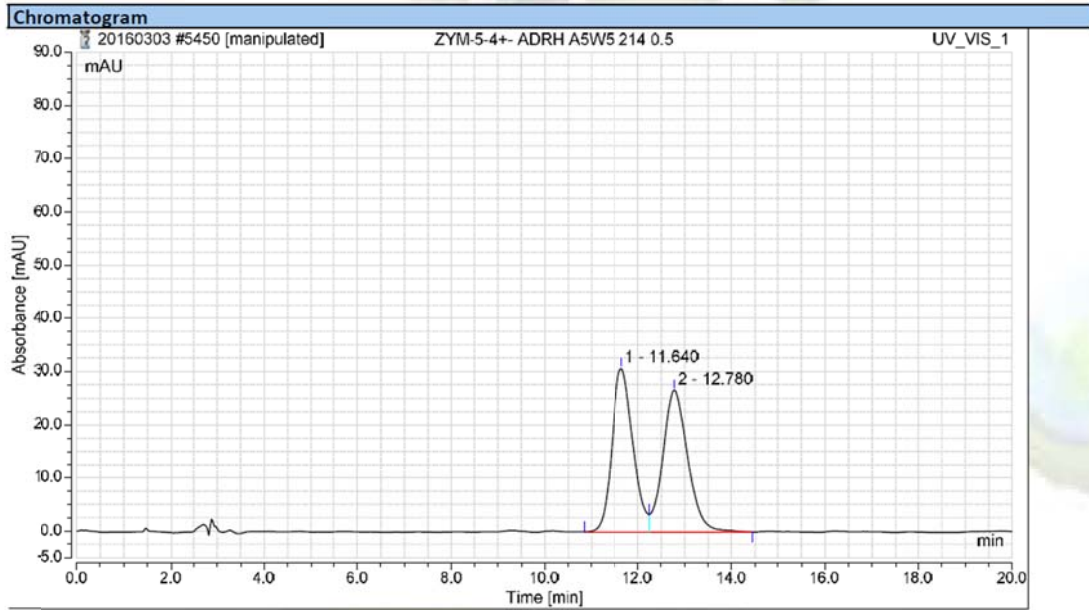

| Integration Results |                       |                 |                 |                    |
|---------------------|-----------------------|-----------------|-----------------|--------------------|
| No.                 | Retention Time<br>min | Area<br>mAU*min | Height<br>mAU   | Relative Area<br>% |
| 1                   | 11.640                | 16.3680         | 30.8136         | 49.780             |
| 2                   | 12.780                | 16.5130         | 26.6937         | 50.220             |
| <b>Total:</b>       |                       | <b>32.881</b>   | <b>1401.998</b> | <b>100.000</b>     |

# HPLC of 3q

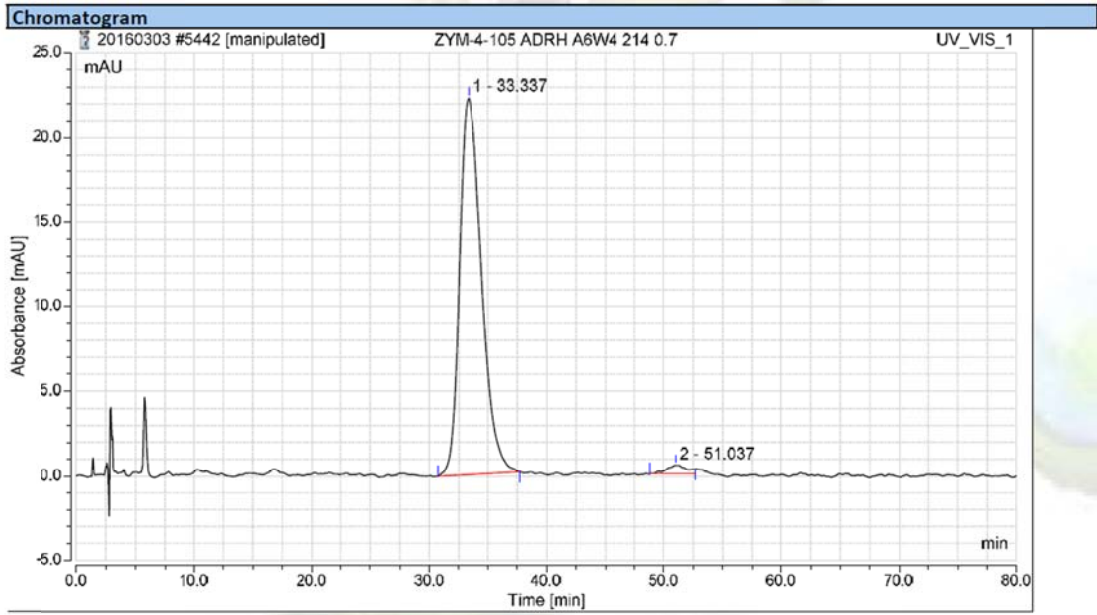

**Integration Results**

| No.           | Retention Time<br>min | Area<br>mAU*min | Height<br>mAU   | Relative Area<br>% |
|---------------|-----------------------|-----------------|-----------------|--------------------|
| 1             | 33.337                | 48.2474         | 22.2994         | 98.086             |
| 2             | 51.037                | 0.9414          | 0.4981          | 1.914              |
| <b>Total:</b> |                       | <b>49.189</b>   | <b>1401.998</b> | <b>100.000</b>     |

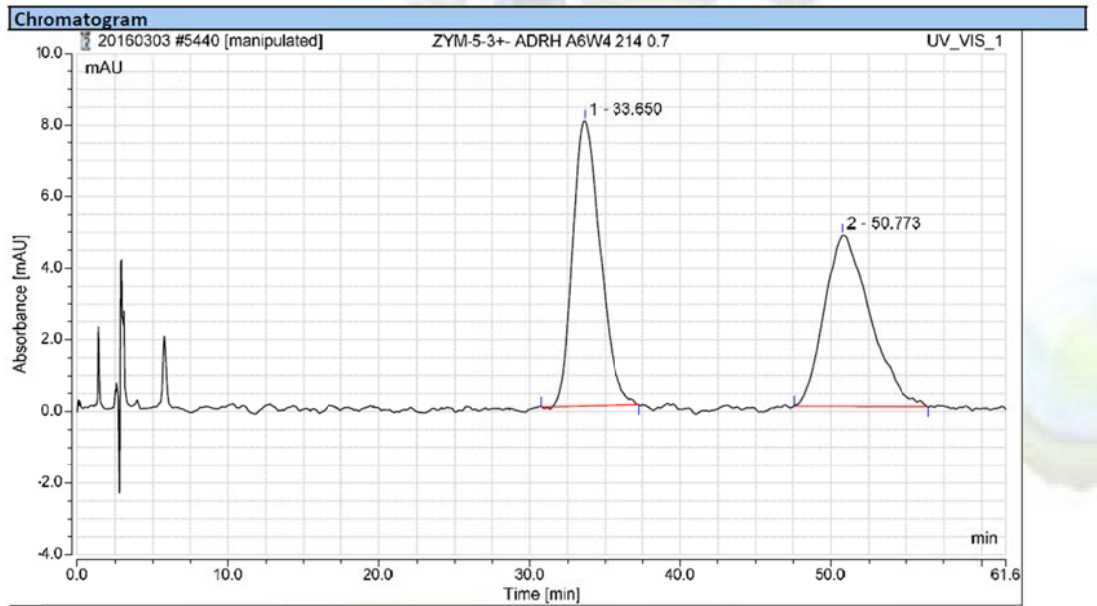

**Integration Results**

| No.           | Retention Time<br>min | Area<br>mAU*min | Height<br>mAU   | Relative Area<br>% |
|---------------|-----------------------|-----------------|-----------------|--------------------|
| 1             | 33.650                | 16.8446         | 7.9743          | 50.324             |
| 2             | 50.773                | 16.6274         | 4.7830          | 49.676             |
| <b>Total:</b> |                       | <b>33.472</b>   | <b>1401.998</b> | <b>100.000</b>     |

## HPLC of 3r

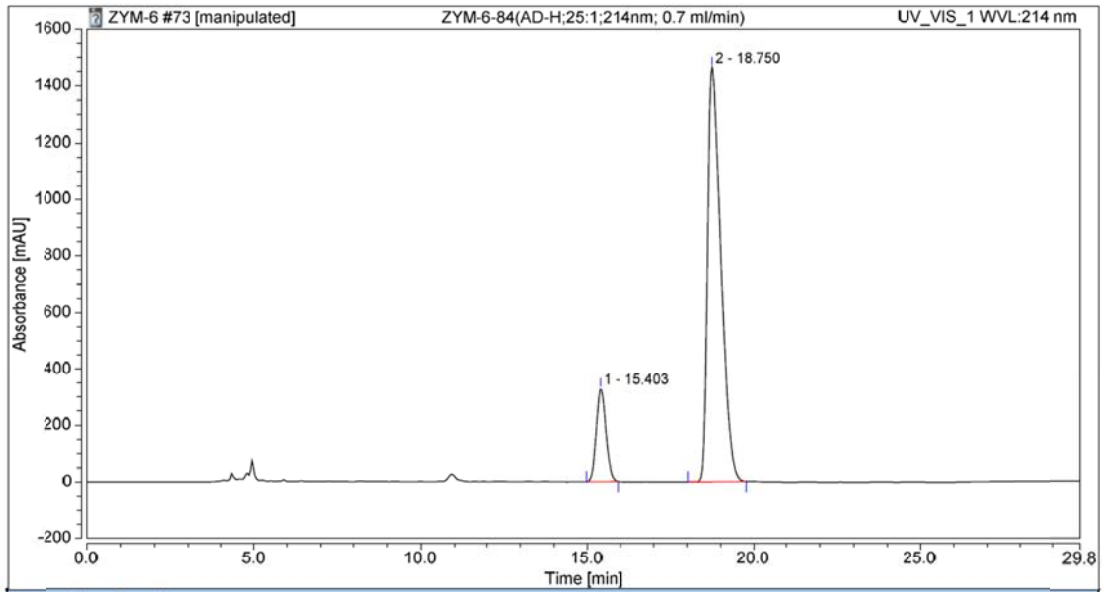

| Integration Results |           |                       |                 |                 |                    |                      |                |
|---------------------|-----------|-----------------------|-----------------|-----------------|--------------------|----------------------|----------------|
| No.                 | Peak Name | Retention Time<br>min | Area<br>mAU*min | Height<br>mAU   | Relative Area<br>% | Relative Height<br>% | Amount<br>n.a. |
| 1                   |           | 15.403                | 109.947         | 329.839         | 13.94              | 18.38                | n.a.           |
| 2                   |           | 18.750                | 678.597         | 1464.847        | 86.06              | 81.62                | n.a.           |
| <b>Total:</b>       |           |                       | <b>788.544</b>  | <b>1794.686</b> | <b>100.00</b>      | <b>100.00</b>        |                |

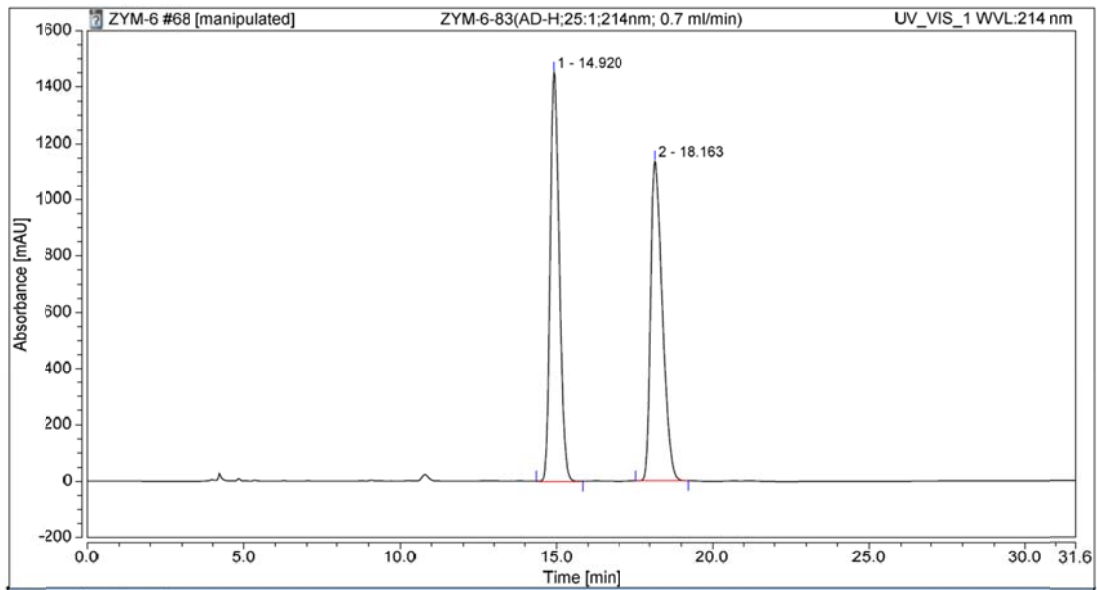

| Integration Results |           |                       |                 |                 |                    |                      |                |
|---------------------|-----------|-----------------------|-----------------|-----------------|--------------------|----------------------|----------------|
| No.                 | Peak Name | Retention Time<br>min | Area<br>mAU*min | Height<br>mAU   | Relative Area<br>% | Relative Height<br>% | Amount<br>n.a. |
| 1                   |           | 14.920                | 487.153         | 1452.212        | 49.85              | 56.12                | n.a.           |
| 2                   |           | 18.163                | 490.071         | 1135.266        | 50.15              | 43.88                | n.a.           |
| <b>Total:</b>       |           |                       | <b>977.224</b>  | <b>2587.478</b> | <b>100.00</b>      | <b>100.00</b>        |                |

# HPLC of 3s

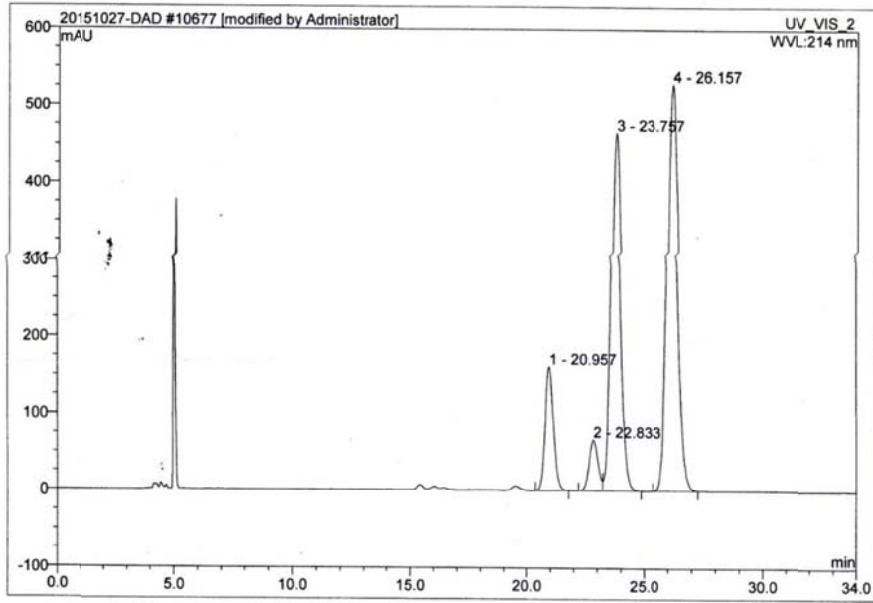

| No.           | Ret.Time min | Peak Name | Height mAU | Area mAU*min | Rel.Area % | Amount | Type |
|---------------|--------------|-----------|------------|--------------|------------|--------|------|
| 1             | 20.96        | n.a.      | 161.814    | 66.143       | 11.08      | n.a.   | BMB  |
| 2             | 22.83        | n.a.      | 67.122     | 29.365       | 4.92       | n.a.   | BM * |
| 3             | 23.76        | n.a.      | 466.355    | 223.127      | 37.38      | n.a.   | MB*  |
| 4             | 26.16        | n.a.      | 529.620    | 278.202      | 46.61      | n.a.   | BMB  |
| <b>Total:</b> |              |           | 1224.911   | 596.838      | 100.00     | 0.000  |      |

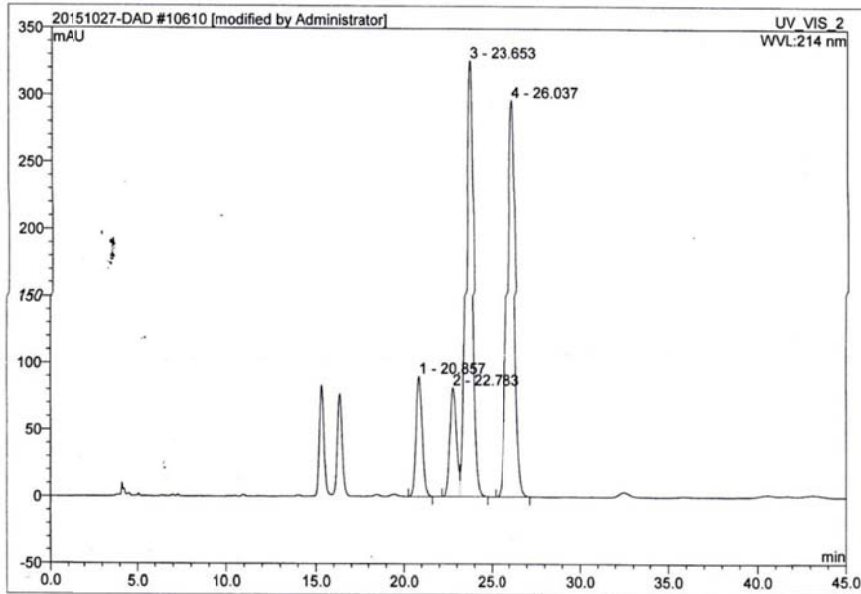

| No.           | Ret.Time min | Peak Name | Height mAU | Area mAU*min | Rel.Area % | Amount | Type |
|---------------|--------------|-----------|------------|--------------|------------|--------|------|
| 1             | 20.86        | n.a.      | 89.412     | 36.487       | 9.52       | n.a.   | BMB  |
| 2             | 22.78        | n.a.      | 80.883     | 35.550       | 9.27       | n.a.   | BM   |
| 3             | 23.65        | n.a.      | 325.814    | 156.025      | 40.70      | n.a.   | MB   |
| 4             | 26.04        | n.a.      | 296.849    | 155.252      | 40.50      | n.a.   | BMB  |
| <b>Total:</b> |              |           | 792.958    | 383.313      | 100.00     | 0.000  |      |

## HPLC of 3t

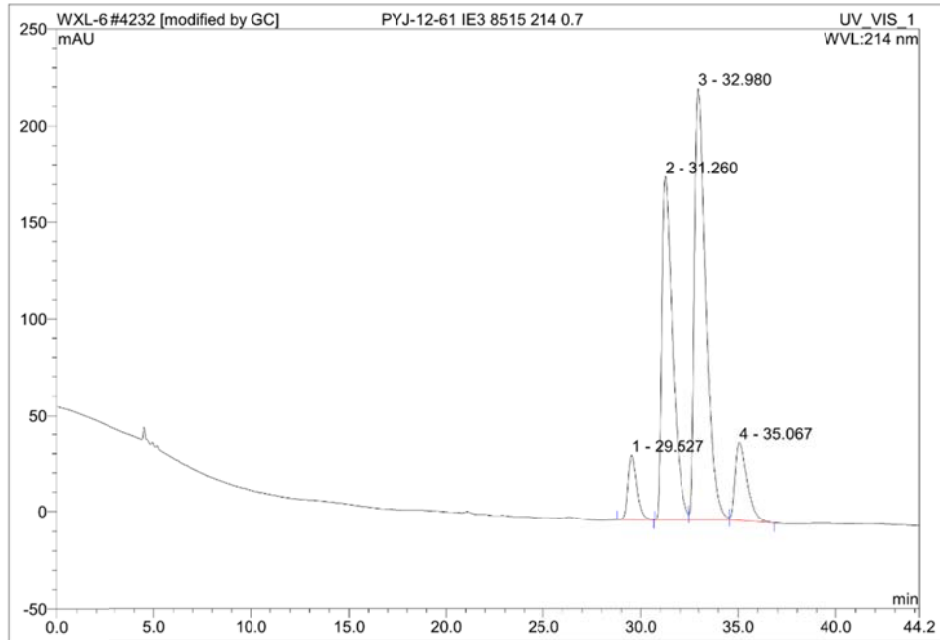

| No.           | Ret.Time min | Peak Name | Height mAU | Area mAU*min | Rel.Area % | Amount | Type |
|---------------|--------------|-----------|------------|--------------|------------|--------|------|
| 1             | 29.53        | n.a.      | 33.546     | 17.584       | 5.58       | n.a.   | BMB* |
| 2             | 31.26        | n.a.      | 177.719    | 117.170      | 37.21      | n.a.   | BM * |
| 3             | 32.98        | n.a.      | 223.387    | 151.661      | 48.16      | n.a.   | M *  |
| 4             | 35.07        | n.a.      | 40.371     | 28.512       | 9.05       | n.a.   | MB*  |
| <b>Total:</b> |              |           | 475.023    | 314.926      | 100.00     | 0.000  |      |

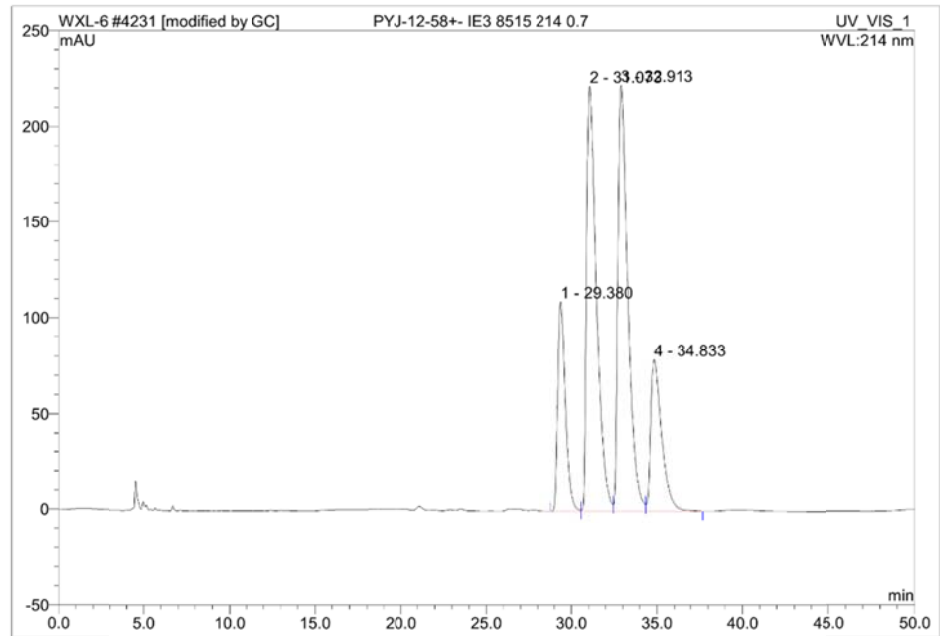

| No.           | Ret.Time min | Peak Name | Height mAU | Area mAU*min | Rel.Area % | Amount | Type |
|---------------|--------------|-----------|------------|--------------|------------|--------|------|
| 1             | 29.38        | n.a.      | 109.512    | 57.209       | 13.76      | n.a.   | BM   |
| 2             | 31.07        | n.a.      | 222.033    | 148.838      | 35.81      | n.a.   | M    |
| 3             | 32.91        | n.a.      | 222.552    | 150.356      | 36.17      | n.a.   | M    |
| 4             | 34.83        | n.a.      | 79.187     | 59.261       | 14.26      | n.a.   | MB   |
| <b>Total:</b> |              |           | 633.284    | 415.664      | 100.00     | 0.000  |      |

## HPLC of 3u

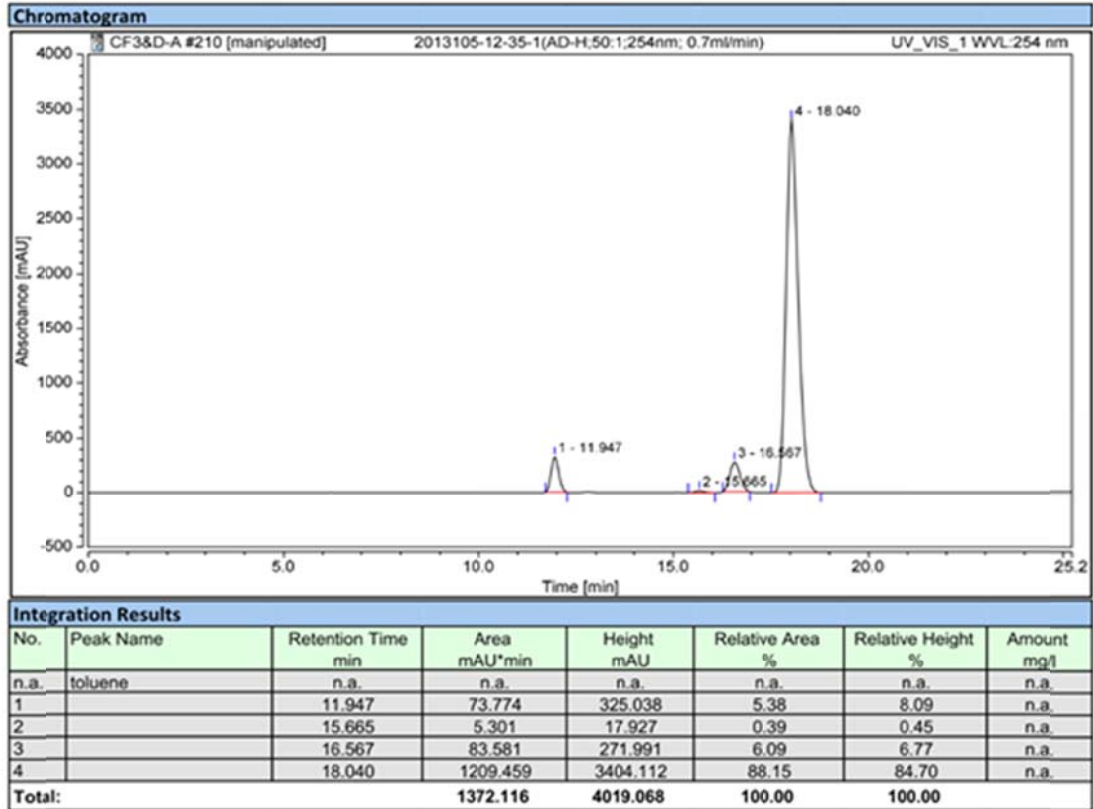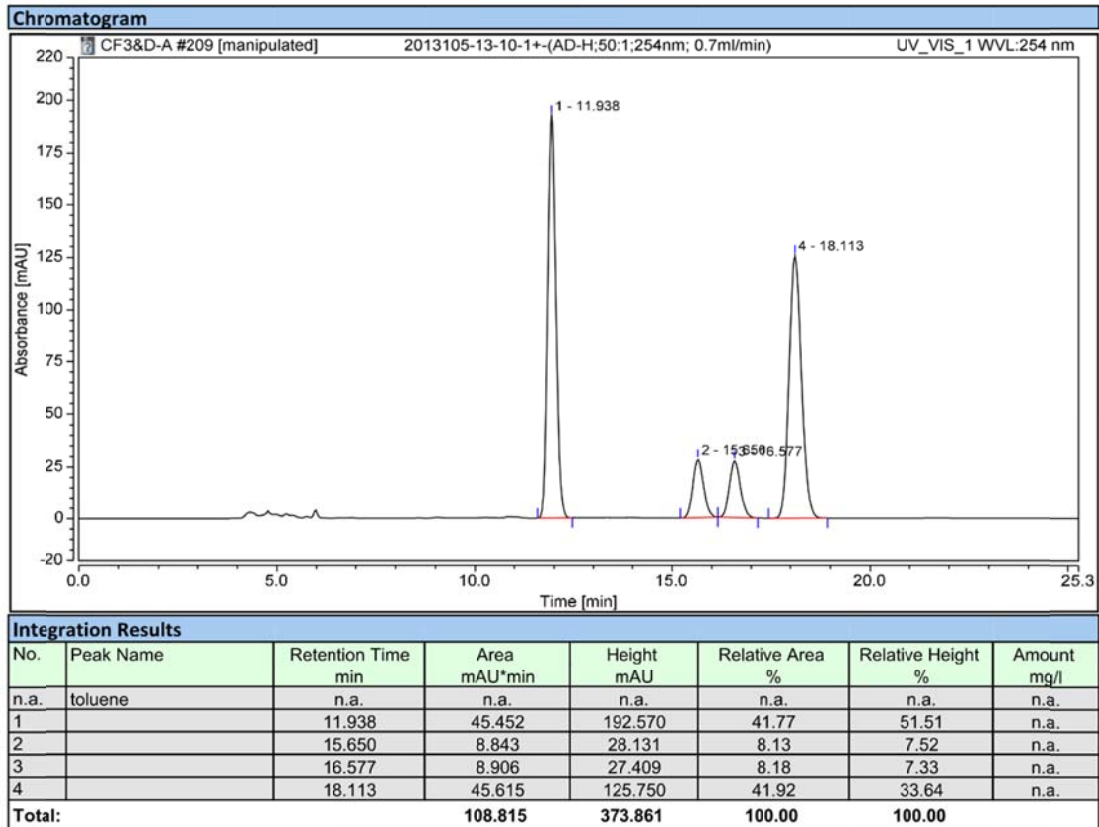

HPLC of 3v

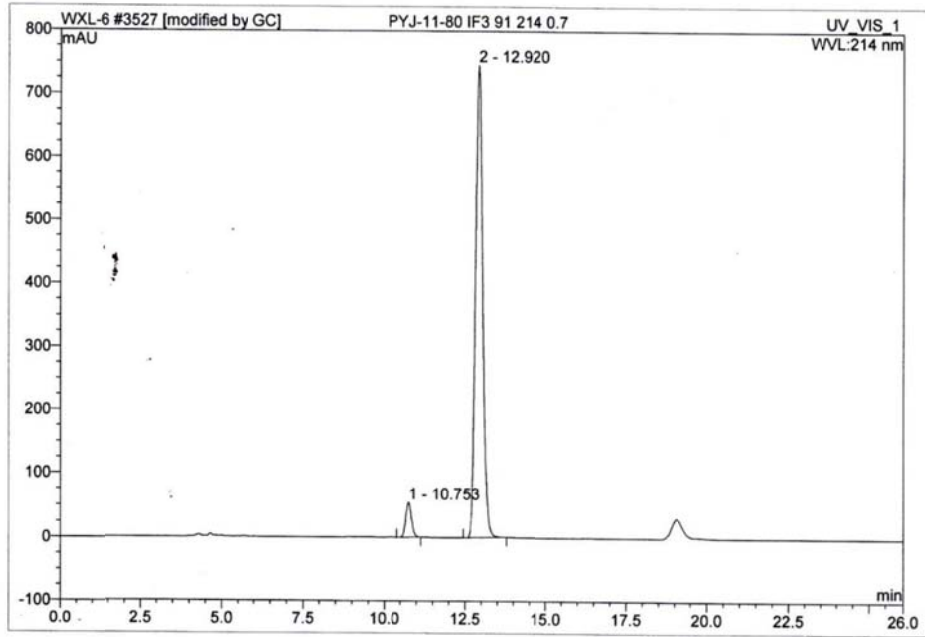

| No.           | Ret.Time min | Peak Name | Height mAU | Area mAU*min | Rel.Area % | Amount | Type |
|---------------|--------------|-----------|------------|--------------|------------|--------|------|
| 1             | 10.75        | n.a.      | 55.361     | 11.350       | 5.55       | n.a.   | BMB* |
| 2             | 12.92        | n.a.      | 746.316    | 193.152      | 94.45      | n.a.   | BMB* |
| <b>Total:</b> |              |           | 801.676    | 204.502      | 100.00     | 0.000  |      |

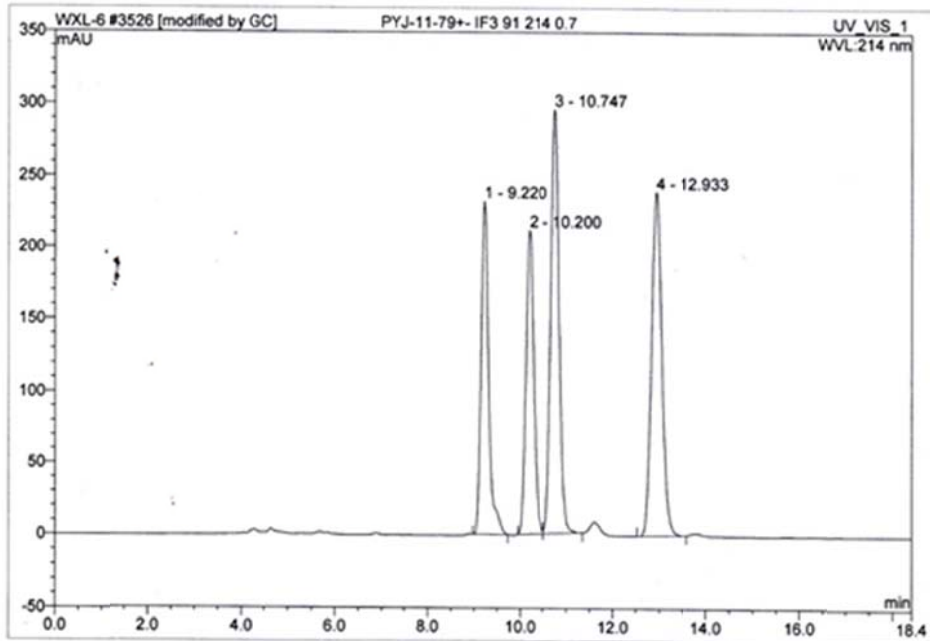

| No.           | Ret.Time min | Peak Name | Height mAU | Area mAU*min | Rel.Area % | Amount | Type |
|---------------|--------------|-----------|------------|--------------|------------|--------|------|
| 1             | 9.22         | n.a.      | 231.630    | 43.935       | 21.12      | n.a.   | BMB* |
| 2             | 10.20        | n.a.      | 211.126    | 41.862       | 20.12      | n.a.   | BM * |
| 3             | 10.75        | n.a.      | 295.187    | 61.016       | 29.33      | n.a.   | MB*  |
| 4             | 12.93        | n.a.      | 239.160    | 61.242       | 29.44      | n.a.   | BMB* |
| <b>Total:</b> |              |           | 977.103    | 208.056      | 100.00     | 0.000  |      |

# HPLC of 3w

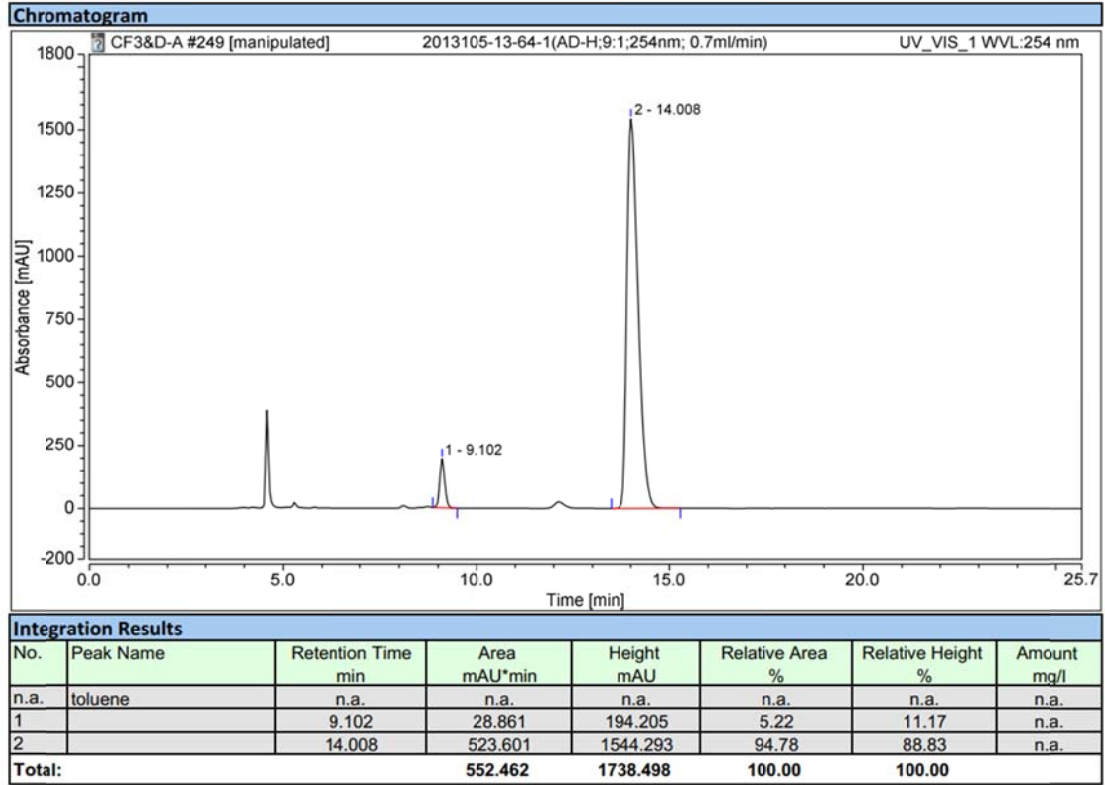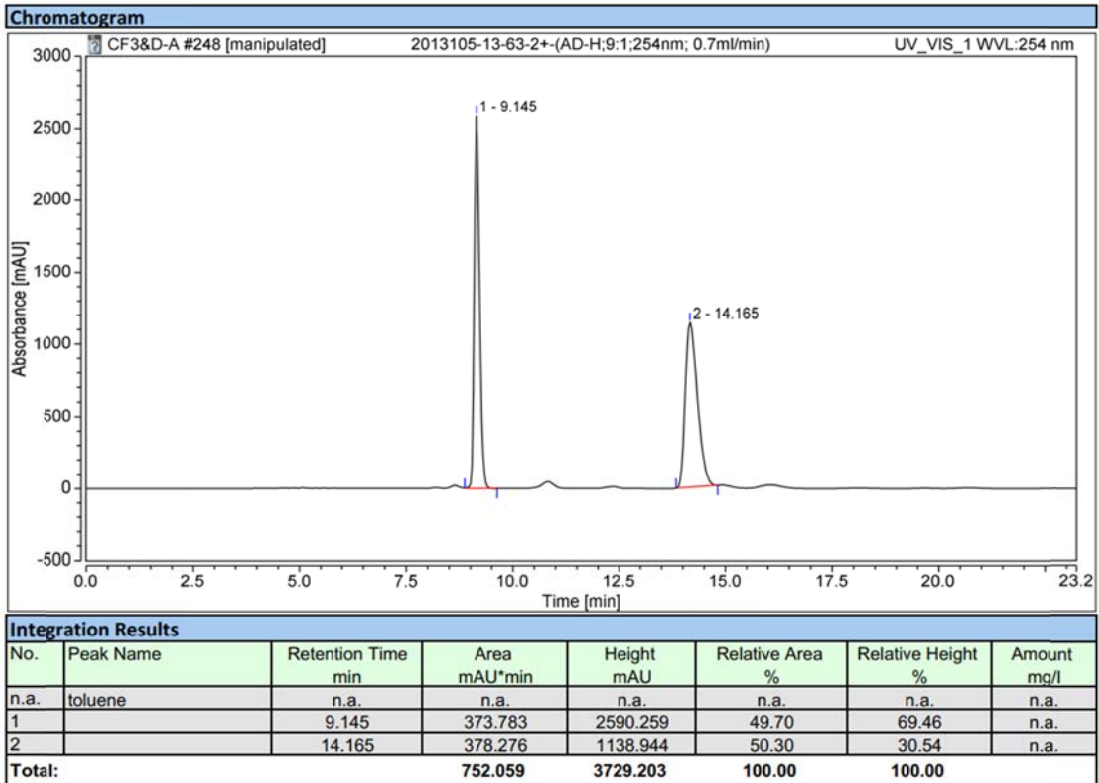



# HPLC of 3x

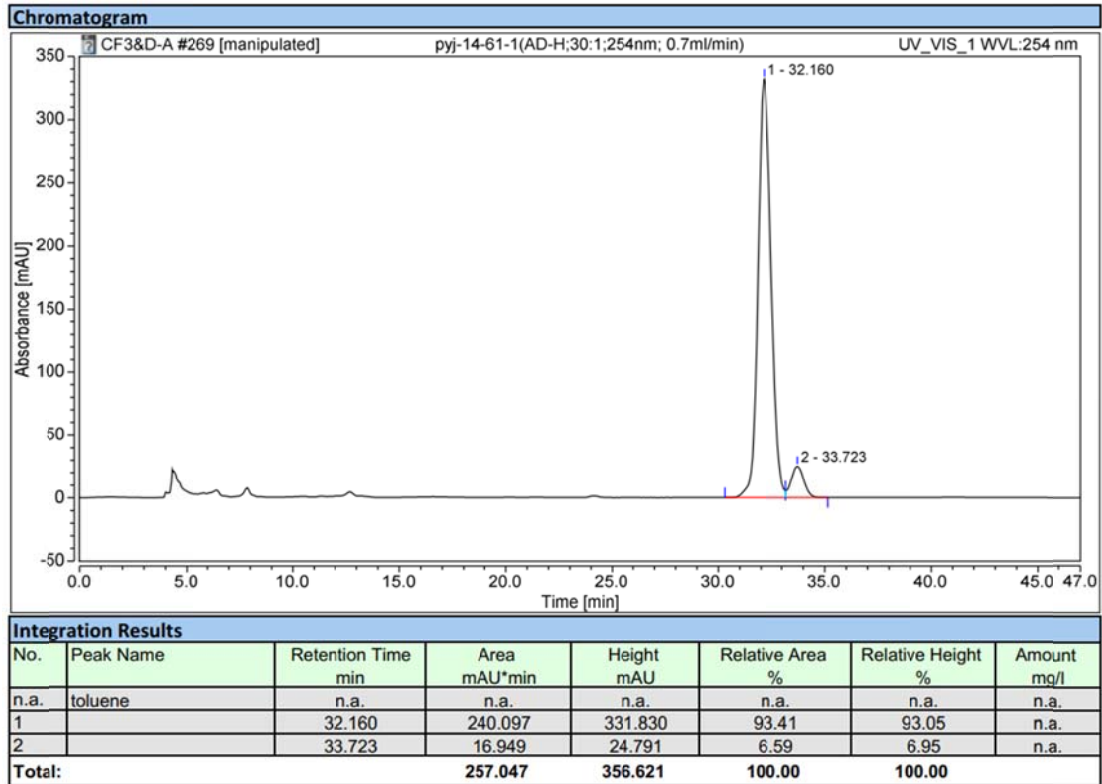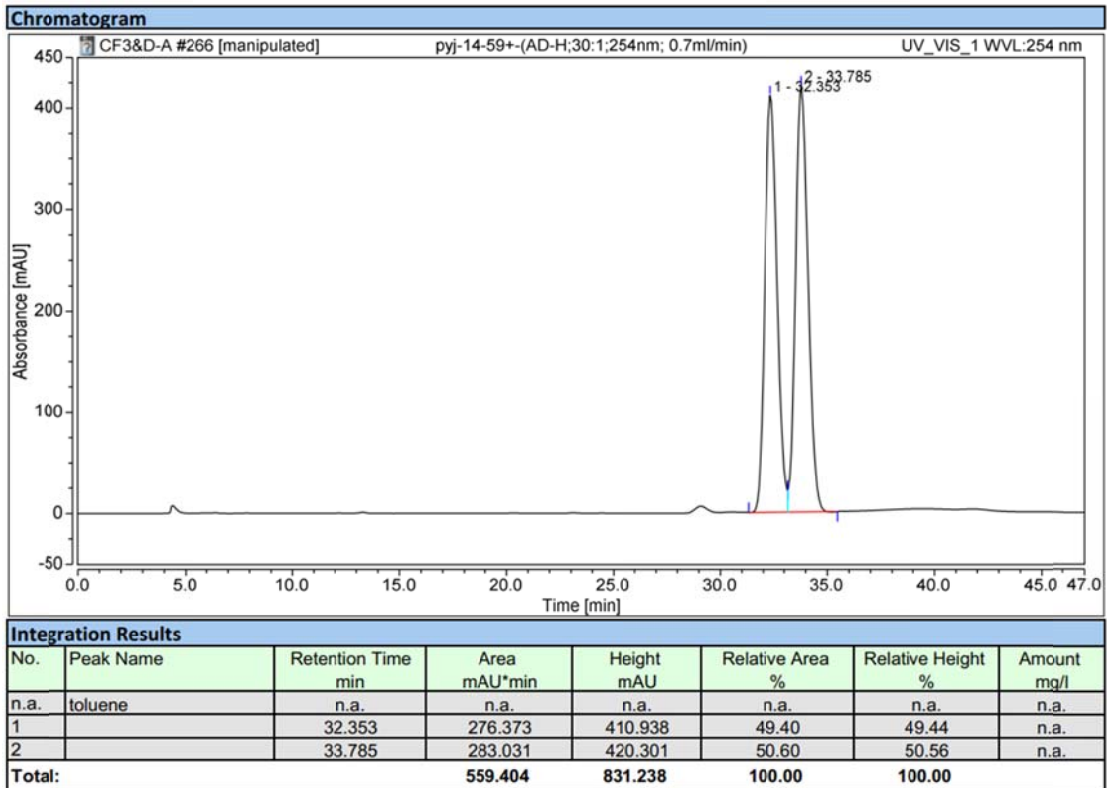

HPLC of 3y

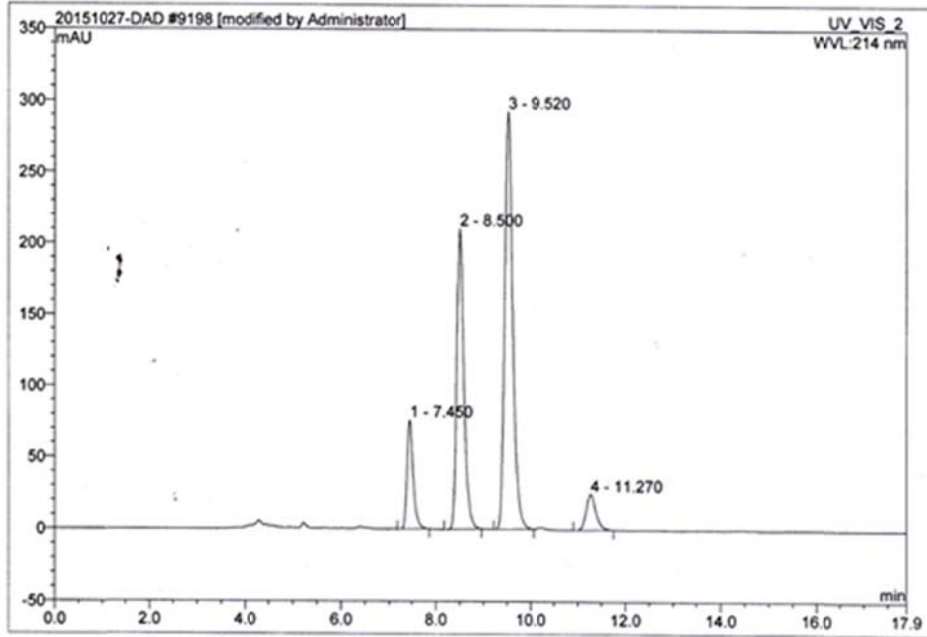

| No.           | Ret.Time min | Peak Name | Height mAU | Area mAU*min | Rel.Area % | Amount | Type |
|---------------|--------------|-----------|------------|--------------|------------|--------|------|
| 1             | 7.45         | n.a.      | 76.351     | 11.444       | 10.26      | n.a.   | BMB* |
| 2             | 8.50         | n.a.      | 210.385    | 36.666       | 32.88      | n.a.   | BMB* |
| 3             | 9.52         | n.a.      | 292.917    | 57.374       | 51.45      | n.a.   | BMB* |
| 4             | 11.27        | n.a.      | 25.540     | 6.025        | 5.40       | n.a.   | BMB* |
| <b>Total:</b> |              |           | 605.193    | 111.509      | 100.00     | 0.000  |      |

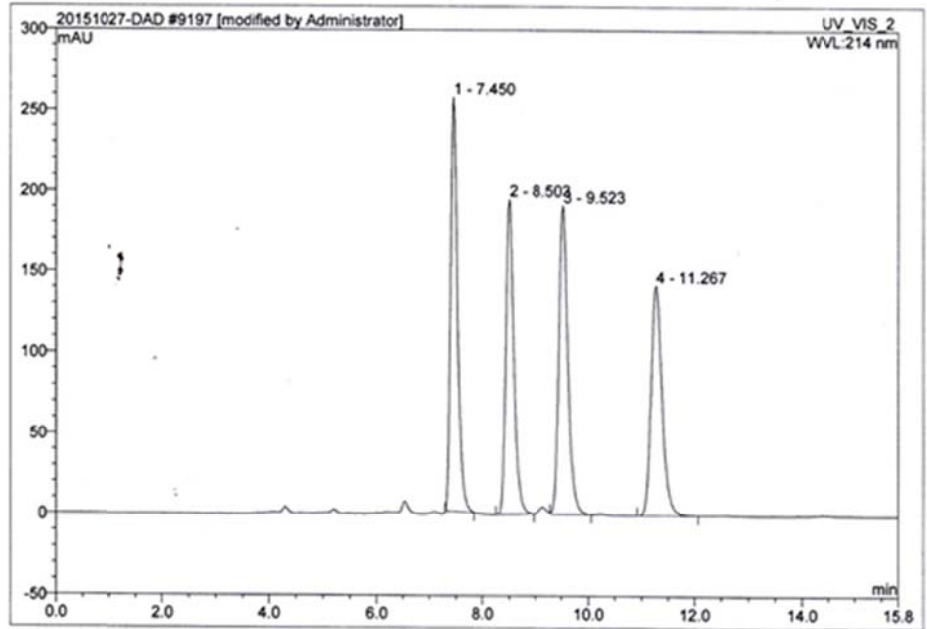

| No.           | Ret.Time min | Peak Name | Height mAU | Area mAU*min | Rel.Area % | Amount | Type |
|---------------|--------------|-----------|------------|--------------|------------|--------|------|
| 1             | 7.45         | n.a.      | 256.525    | 38.579       | 26.80      | n.a.   | BMB* |
| 2             | 8.50         | n.a.      | 194.837    | 33.895       | 23.54      | n.a.   | BMB* |
| 3             | 9.52         | n.a.      | 191.157    | 37.551       | 26.08      | n.a.   | MB*  |
| 4             | 11.27        | n.a.      | 142.404    | 33.940       | 23.58      | n.a.   | BMB  |
| <b>Total:</b> |              |           | 784.922    | 143.964      | 100.00     | 0.000  |      |

# HPLC of 3z

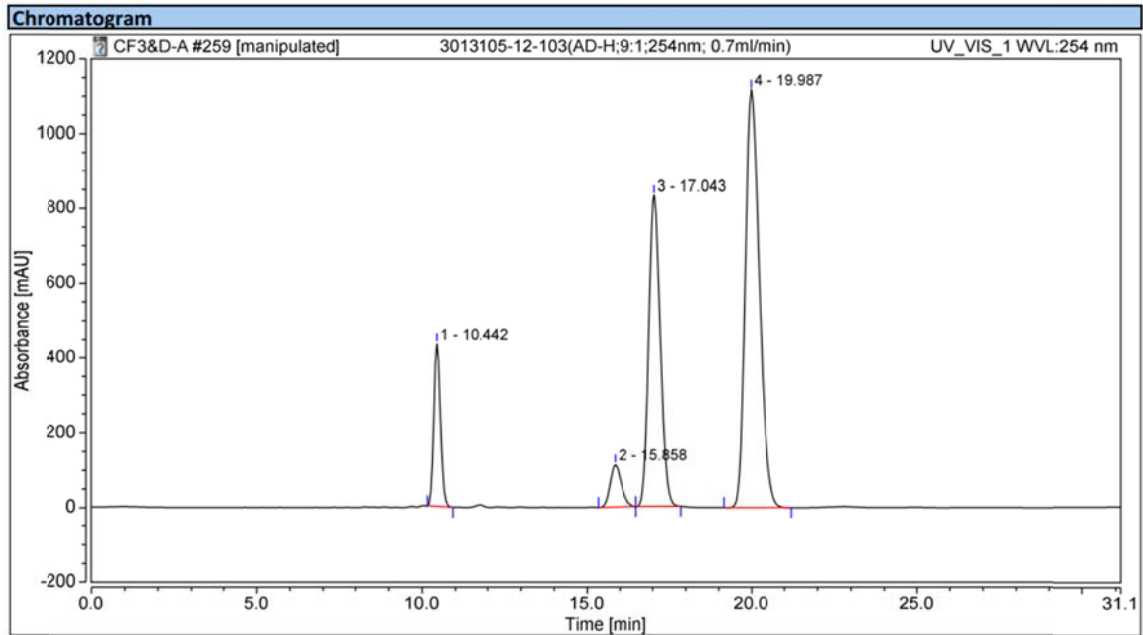

**Integration Results**

| No.           | Peak Name | Retention Time min | Area mAU*min    | Height mAU      | Relative Area % | Relative Height % | Amount mg/l |
|---------------|-----------|--------------------|-----------------|-----------------|-----------------|-------------------|-------------|
| n.a.          | toluene   | n.a.               | n.a.            | n.a.            | n.a.            | n.a.              | n.a.        |
| 1             |           | 10.442             | 100.694         | 434.934         | 9.66            | 17.43             | n.a.        |
| 2             |           | 15.858             | 45.072          | 112.755         | 4.33            | 4.52              | n.a.        |
| 3             |           | 17.043             | 338.274         | 830.774         | 32.47           | 33.30             | n.a.        |
| 4             |           | 19.987             | 557.903         | 1116.383        | 53.54           | 44.75             | n.a.        |
| <b>Total:</b> |           |                    | <b>1041.942</b> | <b>2494.846</b> | <b>100.00</b>   | <b>100.00</b>     |             |

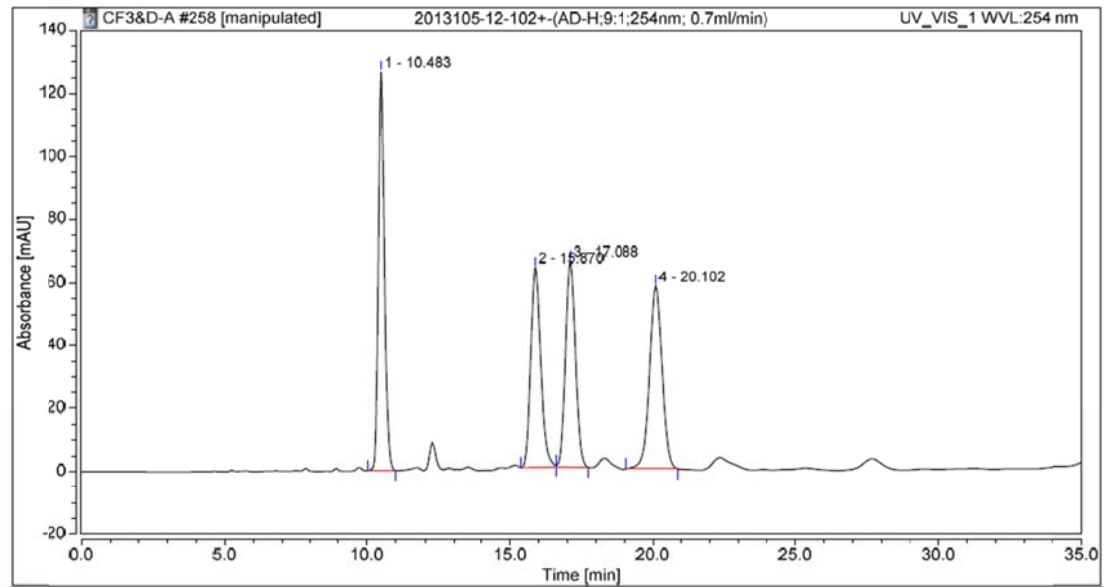

**Integration Results**

| No.           | Peak Name | Retention Time min | Area mAU*min   | Height mAU     | Relative Area % | Relative Height % | Amount mg/l |
|---------------|-----------|--------------------|----------------|----------------|-----------------|-------------------|-------------|
| n.a.          | toluene   | n.a.               | n.a.           | n.a.           | n.a.            | n.a.              | n.a.        |
| 1             |           | 10.483             | 30.445         | 126.475        | 27.18           | 40.31             | n.a.        |
| 2             |           | 15.870             | 25.712         | 63.518         | 22.95           | 20.25             | n.a.        |
| 3             |           | 17.088             | 26.241         | 65.507         | 23.43           | 20.88             | n.a.        |
| 4             |           | 20.102             | 29.618         | 58.218         | 26.44           | 18.56             | n.a.        |
| <b>Total:</b> |           |                    | <b>112.015</b> | <b>313.717</b> | <b>100.00</b>   | <b>100.00</b>     |             |
